# Supplementary material for: A synaptomic analysis reveals dopamine hub synapses in the mouse striatum
Source: PubMed Central journal article supplement (PMC9166739; doi:10.1038/s41467-022-30776-9), 2022-06-03
Supplement: 41467_2022_30776_MOESM1_ESM.pdf [file 41467_2022_30776_MOESM1_ESM.pdf]

# **A synaptomic analysis reveals dopamine hub synapses in the mouse striatum.**

## **Table of Contents**

|                                                                                                            |            |
|------------------------------------------------------------------------------------------------------------|------------|
| <b>SUPPLEMENTARY FIGURE 2: IMMUNOFLUORESCENCE OF DA-FASS SYNAPTOSOMES. ....</b>                            | <b>3</b>   |
| <b>SUPPLEMENTARY FIGURE 3: META-ANALYSIS OF ENRICHED PROTEINS WITH SINGLE CELL RNA DATABASES. ....</b>     | <b>4</b>   |
| <b>SUPPLEMENTARY FIGURE 4: CHARACTERIZATION OF THALAMO-STRIATAL HUB SYNAPSES. ....</b>                     | <b>5</b>   |
| <b>SUPPLEMENTARY FIGURE 5: POSITIVE AND NEGATIVE CONTROLS TO DOPAMINE HUB SYNAPSE IDENTIFICATION. ....</b> | <b>6</b>   |
| <b>SUPPLEMENTARY FIGURE 6: CHARACTERIZATION OF VGLUT1/TH HUB SYNAPSES. ....</b>                            | <b>8</b>   |
| <b>SUPPLEMENTARY TABLE 1: ANTIBODIES LIST AND DILUTION. ....</b>                                           | <b>9</b>   |
| <b>SUPPLEMENTARY TABLE 2: STATISTICAL ANALYSIS. ....</b>                                                   | <b>12</b>  |
| <b>SUPPLEMENTARY TABLE 3: PROTEOMICS DATASET. ....</b>                                                     | <b>20</b>  |
| <b>SUPPLEMENTARY TABLE 4: PROTEOMICS COMPARISON WITH SHARMA ET AL. ....</b>                                | <b>83</b>  |
| <b>SUPPLEMENTARY TABLE 5: PROTEOMICS COMPARISON WITH KEGG NEUROTRANSMISSION PATHWAYS. ....</b>             | <b>333</b> |
| <b>SUPPLEMENTARY DATA: UNCROPPED IMAGES FROM CAPILLARY IMMUNOBLOT EXPERIMENTS. ....</b>                    | <b>337</b> |

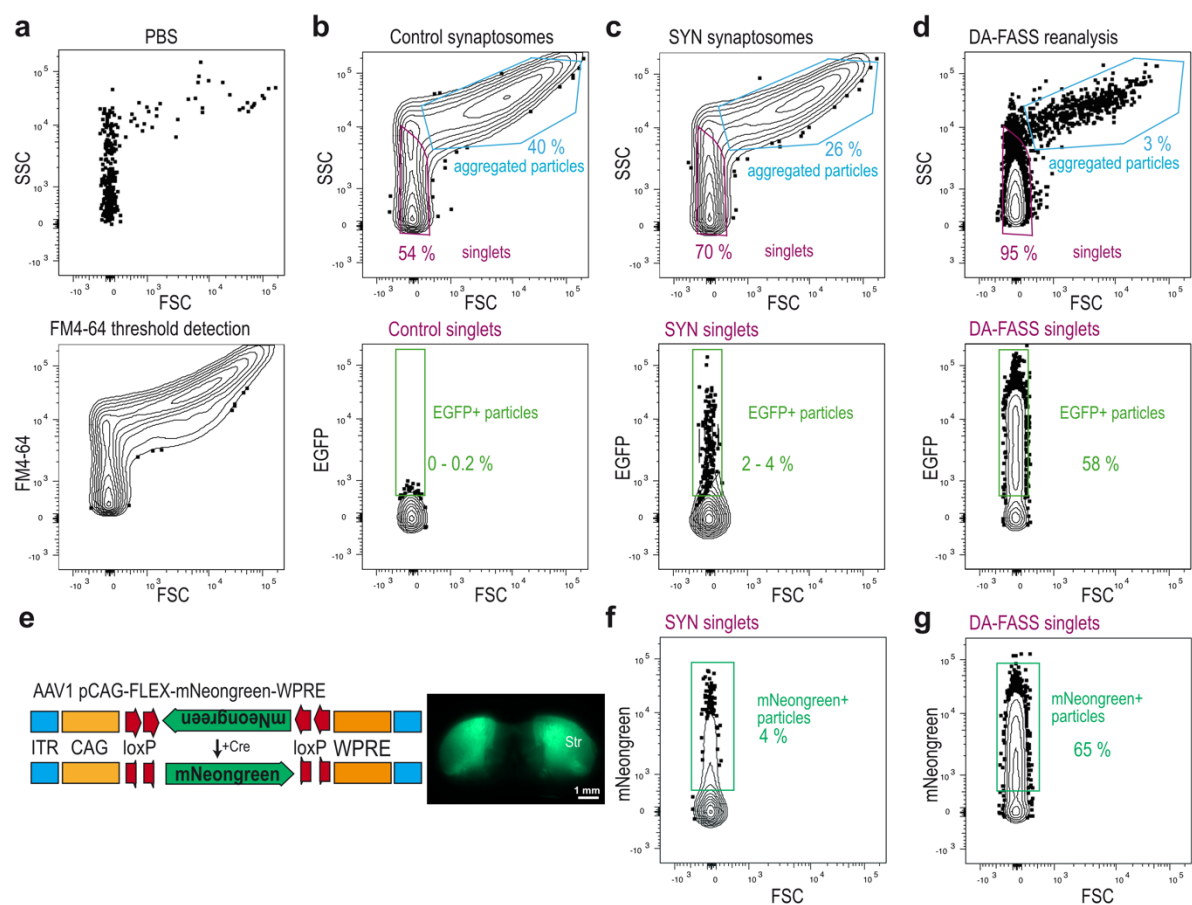

**Supplementary Figure 1: DA-FASS gating strategy.** **a-d** Representative FASS gate settings and particles detection for EGFP+ synaptosomes sorting. **a** Analysis of PBS allows defining the background noise of the thresholding using FM4-64 lipophilic styryl dye used. The noise is less than 500 events per minute. Particle detection using FM4-64 thresholding (bottom). **b** Side scatter (SSC) and forward scatter (FSC) analysis of synaptosomes allows defining aggregated particles (40 %, light blue gate) and singlets (54 %, magenta gate). As published previously, singlets gate was defined experimentally through trials and error<sup>21</sup>. Singlets are further analysed for EGFP fluorescence. Control synaptosomes display low autofluorescence. **c** SYN synaptosomes samples showed 26 % of aggregated particles and 70 % of singlets on this example. 2-4 % of the singlets were significantly fluorescent in the EGFP channel. **d** Sorted particles gated as “singlets” and “EGFP+” were re-analysed showing a drop in the proportion

of aggregated particles (3 %) and a steep rise in singlets (95 %). Up to 58 % of singlets were EGFP+. **e** Cre-dependent AAV expressing mNeongreen and mNeongreen striatal expression. Scale bar = 1mm. **f** Before sorting 4 % of the singlets were significantly fluorescent in the mNeongreen channel. **g** Same as d, after sorting up to 65 % of singlets were mNeongreen+ in the DA-FASS sample.

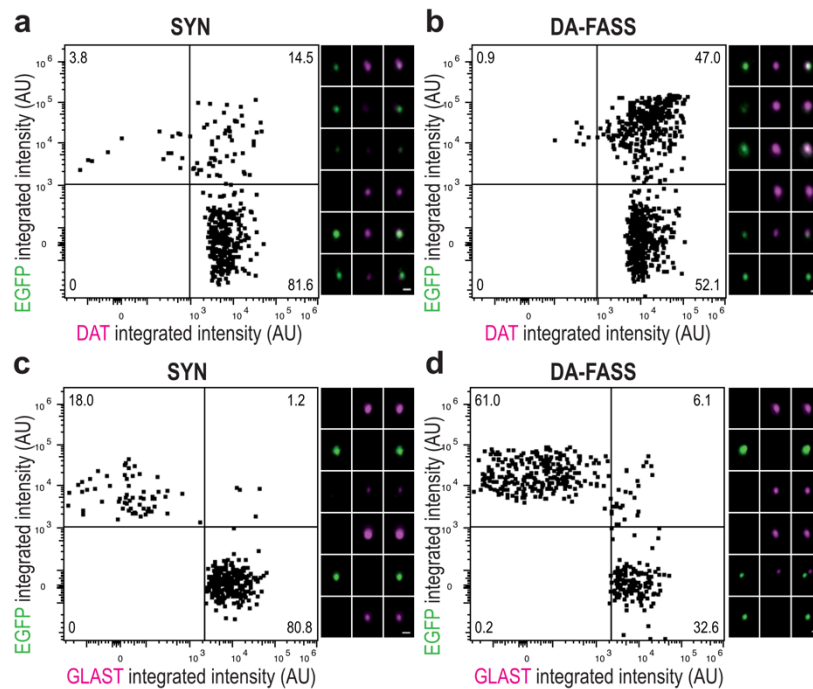

**Supplementary Figure 2: Immunofluorescence of DA-FASS synaptosomes.** **a-b** Dot plots of SYN and DA-FASS synaptosomes stained for the dopamine transporter DAT (x-axis) EGFP (y-axis) and galleries of representative epifluorescence images of individual synaptosomes. The population of particles positive for both EGFP and DAT (upper right quadrant) increases from 15 % in the SYN to 47 % in the DA-FASS sample. **c-d** Dot plots of intensity signal of singlets and DA-FASS synaptosomes stained for EGFP and the astrocyte membrane marker Slc1a3/GLAST and galleries of representative images. Note the very low representation of double positive particles. Scale bar = 1  $\mu$ m.

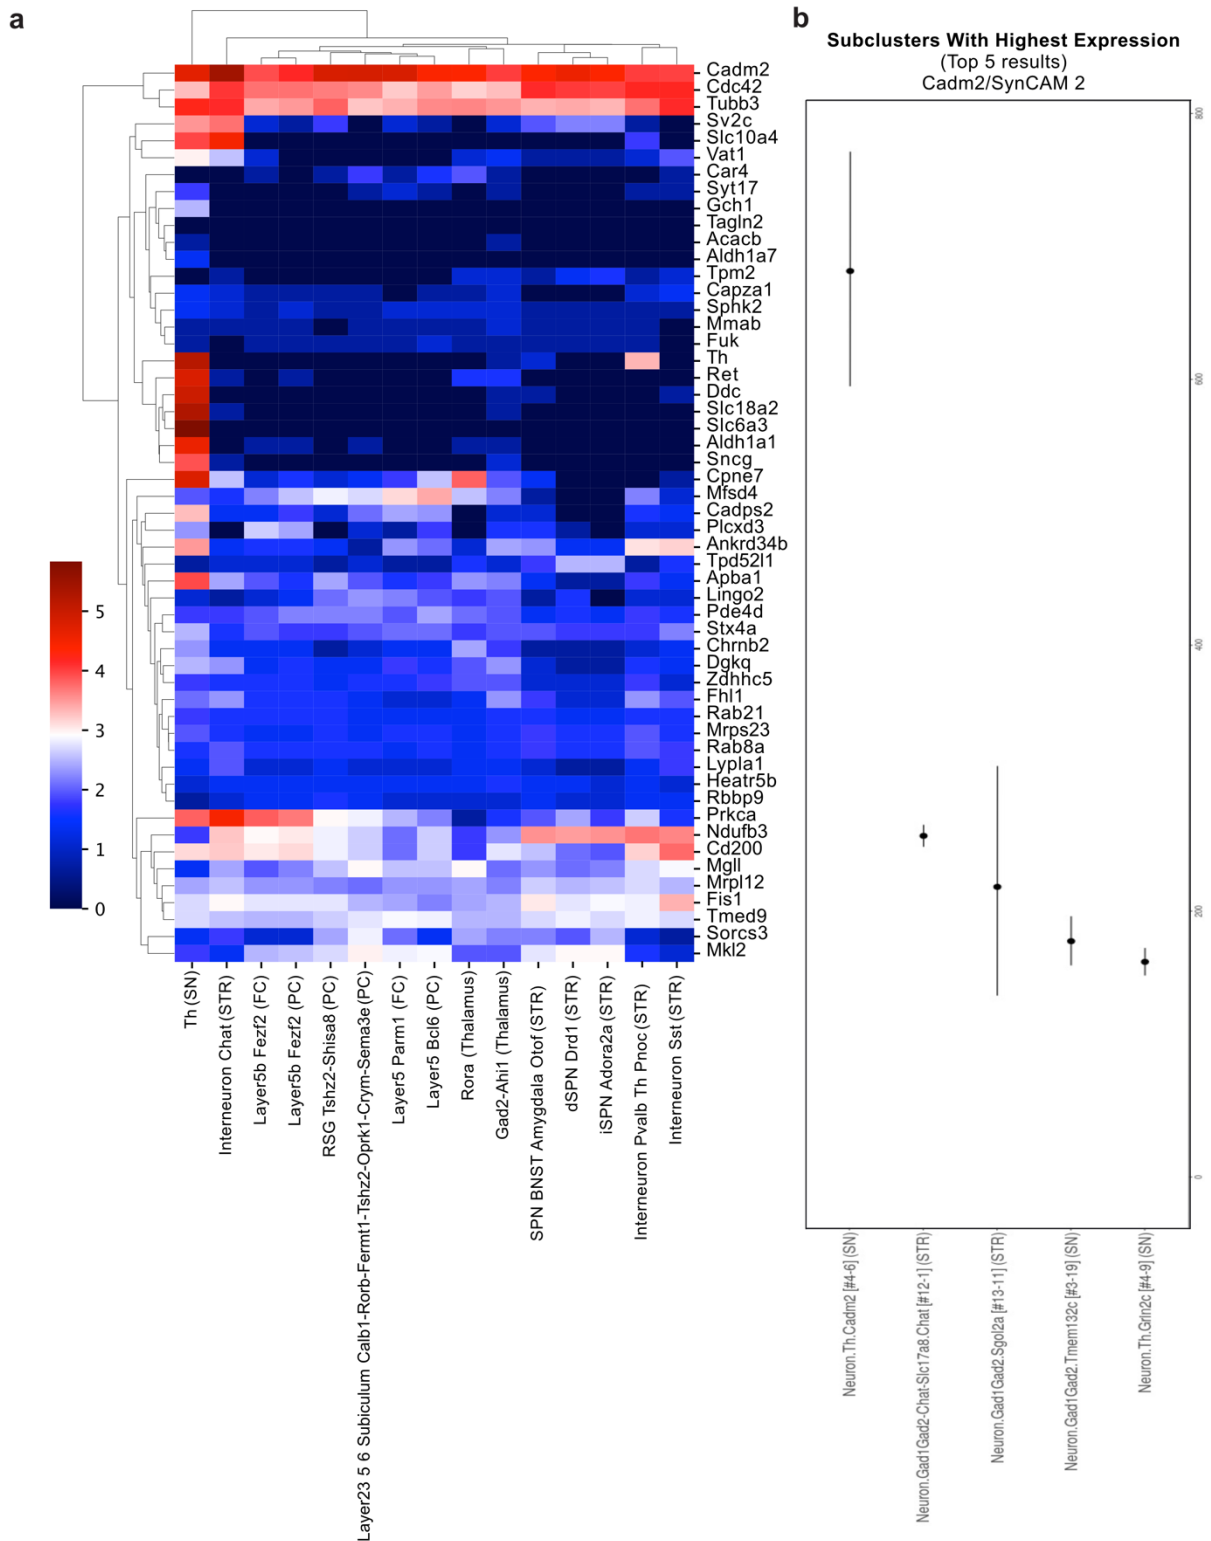

**Supplementary Figure 3: Meta-analysis of enriched proteins with single cell RNA databases.** **a** Extended Heatmap showing cell type specific mRNA abundance in neuronal cells from or projecting to the striatum (STR; Substantia Nigra, SN; Frontal Cortex, FC; Posterior Cortex, PC; Thalamus) of 53 of the enriched DA-FASS proteins present in the DropViz single

cell RNA sequencing database (Stx4a = Stx4, Mfsd4 = Mfsd4a, Fuk = Fcsk, Car4 = Ca4, Mkl2 = Mrtfb) (DropViz; <sup>35</sup>). **b** Drop Viz representation of Cadm2/ SynCAM 2 brain cellular subclusters with highest expression. Data represented per 100 000 transcripts in sub cluster. The error bars represent binomially distributed sampling noise given the number of cells in each subcluster; it does not represent heterogeneity in expression among cells within the subcluster. Dropviz data is obtained from at least N=4 independent replicates. Note that the highest Cadm2/SynCAM 2 mRNA expression throughout the brain is found in a sub cluster of substantia nigra Th neurons. Statistical significance was not analysed in this figure.

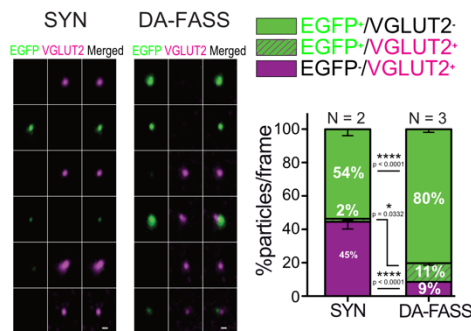

**Supplementary Figure 4: Characterization of thalamo-striatal hub synapses.**

Epifluorescence images of a representative sample of synaptosome populations (singlets and DA FASS) labelled with anti-EGFP and anti-VGLUT2, labelling mainly thalamo-striatal terminals. Analysis of particle proportions per frame. The EGFP<sup>+</sup>/VGLUT2<sup>+</sup> population increases from 2 % to 11 %. All data are mean ± SEM and pulled from 2 to 3 independent sorts. Statistical significance was analysed using Two-way ANOVA, EGFP/VGLUT2: Interaction  $F_{2,54} = 80.90$  \*\*\*\* $p < 0.0001$ , Condition  $F_{1,54} = 0.0001$   $p = 0.991$ , Immunolabelling  $F_{2,54} = 293.7$  \*\*\*\* $p < 0.0001$  with Šídák's multiple comparisons test. Scale bar = 1  $\mu$ m.

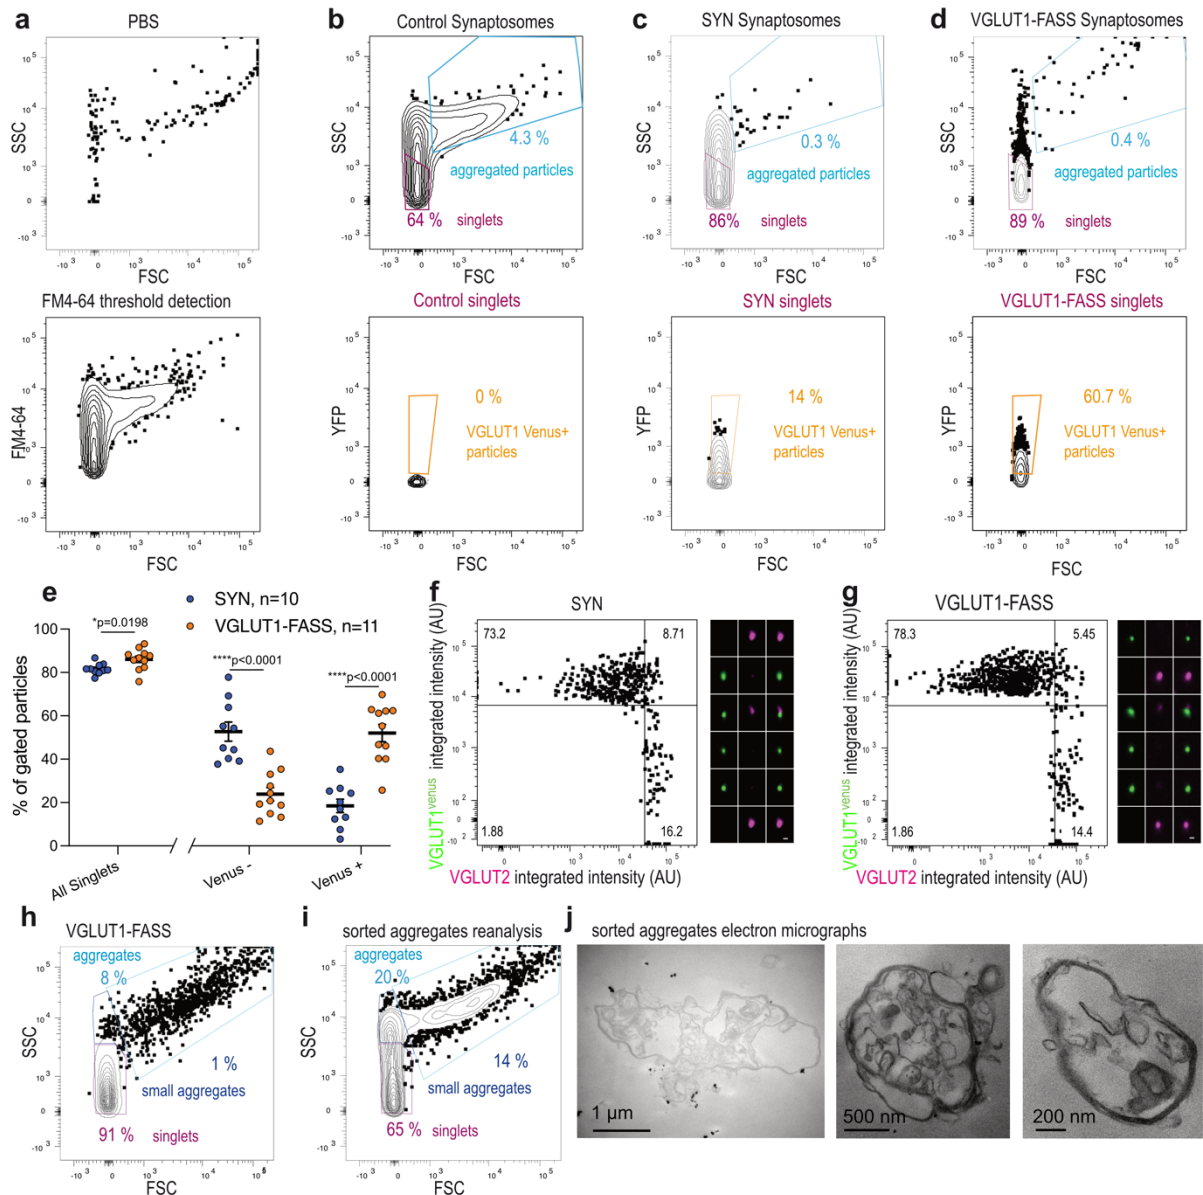

**Supplementary Figure 5: Positive and negative controls to dopamine hub synapse identification.** **a** Analysis of a PBS sample was used to define background noise in FM4-64 lipophilic styryl dye used for thresholding (top). The noise was less than 500 events per minute. Synaptosome sample detection using FM4-64 thresholding (bottom). **b** WT synaptosomes display aggregated particles (4.3 %, light blue) and singlets (64 %, magenta). Singlets gate was defined experimentally through trials and error as published previously (Luquet et al., 2017). Singlets were further analysed for Venus fluorescence to determine the autofluorescence level. **c** SYN synaptosomes samples showed 0.3 % of aggregated particles and 86 % of singlets. 14

% of synaptosomes were detected in the Venus<sup>+</sup> gate. **d** VGLUT1-FASS “singlets” were re-analysed and displayed 0.4 % of aggregated particles and 89 % singlets. Up to 60.7 % of sorted singlets were detected in the Venus<sup>+</sup> gate. **e** Average striatal VGLUT1<sup>venus</sup> FASS results. SYN (blue) and VGLUT1-FASS (orange) samples for the different gates: all singlets, Venus<sup>-</sup>, Venus<sup>+</sup>. Data are mean ± SEM and was obtained through at least 10 independent sorts. Statistical significance was analysed using Two-tailed unpaired t-test for all singlets SYN – VGLUT1-FASS \*p = 0.02 and Two-way ANOVA for VENUS<sup>-/+</sup> singlets: Interaction F<sub>1,38</sub> = 72.11 \*\*\*\*p < 0.0001, Gating F<sub>1,38</sub> = 0.668 p = 0.419, Condition F<sub>1,38</sub> = 0.412 p = 0.525 with Šidák's multiple comparisons test. **f-g** Dot plots SYN and VGLUT1-FASS synaptosomes stained for VGLUT1<sup>venus</sup> and VGLUT2 with galleries of representative epifluorescence images. Note the low representation of synaptosomes associating VGLUT1 (cortico-striatal inputs) and VGLUT2 (Thalamo-striatal inputs). Indeed VGLUT1/-2 double positives do not enrich through FASS. Scale bar = 1 μm. **h-i** Representative FASS gating for aggregates sorting. **h** Sucrose/Ficoll VGLUT1<sup>venus</sup> synaptosome samples showed 8 % of aggregated particles (light blue). **i** Particles gated as “aggregates” and large tissue fragments were sorted and reanalysed. Small and large aggregates represented 34 % of particles after sorting. **j** Electron micrographs of sorted aggregated particles coming from one single experiment. Aggregates appear much larger than hub synapses. Their cellular content is difficult to identify though myelin membranes may be recognized on some of them. Scale bar, 1 μm, 500nm, 200nm.

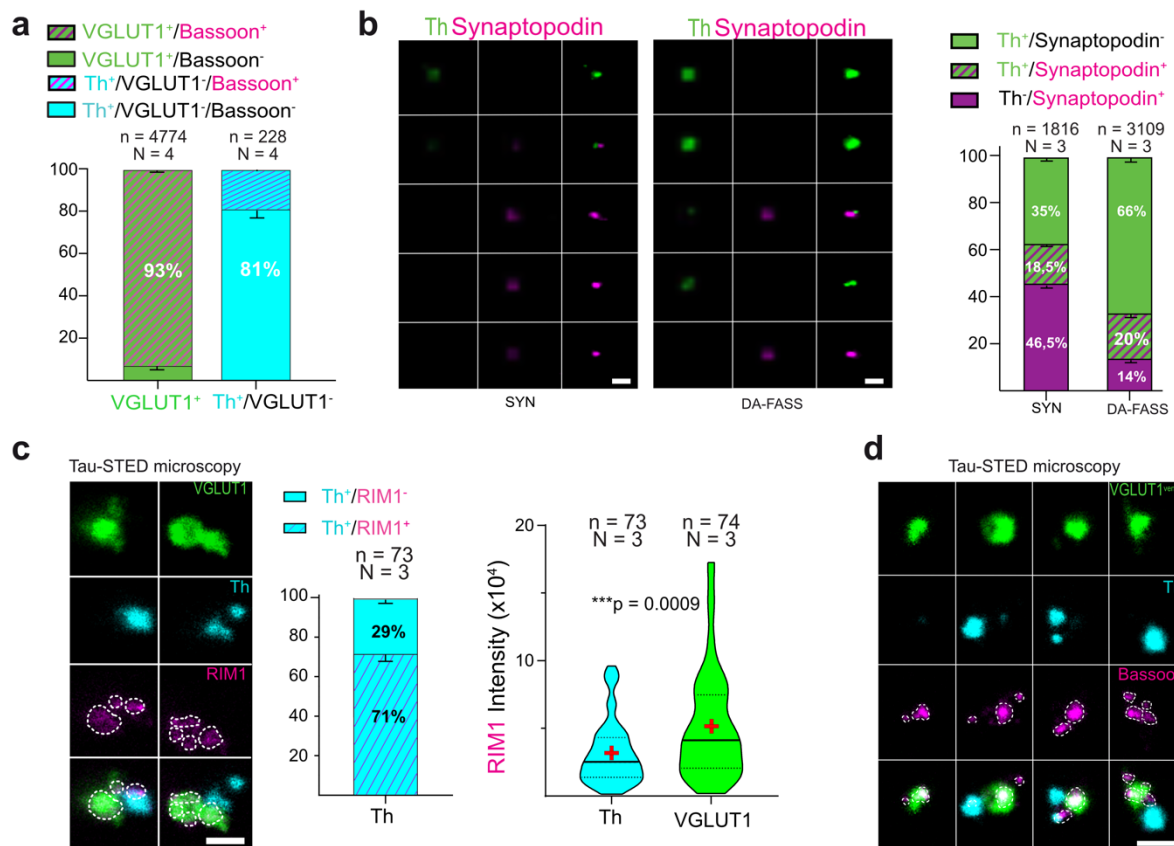

**Supplementary Figure 6: Characterization of VGLUT1/Th hub synapses.** **a** Proportion of Bassoon in VGLUT1<sup>Venus+</sup> or Th<sup>+</sup>/VGLUT1<sup>Venus-</sup> synaptosomes. **b** Epifluorescence images of a representative sample of synaptosome populations (SYN and DA-FASS) labelled with anti-Th (green) and anti-Synaptopodin1 (magenta) and analysis of Th and Synaptopodin particle proportions per frame. Data are expressed as Mean  $\pm$  SEM and pulled from 3 independent experiments. Statistical significance was analysed using Two-way ANOVA, Th/Synaptopodin: Interaction  $F_{2,255} = 251.5$  \*\*\*\* $p < 0.0001$ , Condition  $F_{1,255} = 7.774e-006$   $p = 0.998$ , Immunolabelling  $F_{2,255} = 297.4$  \*\*\*\* $p < 0.0001$ . **c** Representative STED images of VGLUT1<sup>Venus</sup>/Th/RIM1 synaptosomes, quantitative analysis of RIM1 proportion in Th<sup>+</sup> synaptosome and of RIM1 intensity in Th<sup>+</sup> or in VGLUT1<sup>Venus+</sup> synaptosome in Th-VGLUT1<sup>Venus</sup> hubs. Data is expressed as Mean  $\pm$  SEM and pulled from 3 independent experiments. Statistical significance was analysed using Mann Whitney test for intensities,



RIM1: \*\*\*p = 0.0009. **d** Additional representative STED images of VGLUT1<sup>Venus</sup>/Th/Bassoon

synaptosomes coming pulled from 3 independent experiments. Scale bar = 1  $\mu$ m

**Supplementary Table 1: Antibodies list And Dilution**

| Primary Antibodies                          | Source                                   | Identifier                                                                                           | WES (25 ng/ $\mu$ L of protein) | Immuno Fluo |
|---------------------------------------------|------------------------------------------|------------------------------------------------------------------------------------------------------|---------------------------------|-------------|
| Rat monoclonal anti-SynCAM 2                | Thomas Biederer, Yale School of Medicine | N/A, Clone 3E1, No lot number                                                                        | N/A                             | 1/200       |
| Goat polyclonal anti-Dopamine D1 receptor   | Frontier Institute                       | Cat# D1R-Go-Af1000, RRID: AB_2571594, No lot number info not possible to retrieve from collaborator  | N/A                             | 1/1000      |
| Guinea pig polyclonal anti-VGLUT2           | Millipore                                | Cat# AB2251, RRID:AB_1587626, Lot 2879548                                                            | N/A                             | 1/1000      |
| Guinea pig polyclonal anti-VGLUT1           | Millipore                                | Cat# AB5905, RRID:AB_2301751, Lot 3616495                                                            | N/A                             | 1/3000      |
| Guinea pig polyclonal anti-MGL MgII         | Frontier Institute                       | Cat# MGL-GP, RRID:AB_2716807, Lot Af200                                                              | N/A                             | 1/200       |
| Guinea pig polyclonal anti-Homer-1c         | Synaptic Systems                         | Cat# 160 004, RRID:AB_10549720, Lot 2-16                                                             | N/A                             | 1/500       |
| Mouse monoclonal anti-GFP                   | Roche                                    | Cat# 11814460001, RRID:AB_390913, Clone 7.1 and 13.1, Lot 27575600                                   | 1/100                           | 1/1000      |
| Mouse monoclonal anti-Munc-18               | BD Biosciences                           | Cat# 610336, RRID:AB_397726, Clone 31, No lot number info not possible to retrieve from collaborator | 1/500                           | N/A         |
| Mouse monoclonal anti-Synaptophysin 1       | Synaptic Systems                         | Cat# 101 011C3, RRID:AB_887822, Clone 7.2, Lot 1-61                                                  | 1/100                           | N/A         |
| Mouse monoclonal anti-Tyrosine hydroxylase  | Millipore                                | Cat# MAB318, RRID:AB_2201528, Clone LNC1, Lot 3506431                                                | 1/100                           | 1/3000      |
| Mouse monoclonal anti-PSD-95                | Abcam                                    | Cat# ab2723, RRID:AB_303248, Clone 6G6-1C9, Lot GR3589-1                                             | N/A                             | 1/400       |
| Rabbit polyclonal anti-Tyrosine hydroxylase | Synaptic Systems                         | Cat# 213 102, RRID:AB_2619896, Lot 213102/2                                                          | N/A                             | 1/500       |
| Rabbit polyclonal anti-Dopamine D2 receptor | Millipore                                | Cat# AB5084P, RRID:AB_2094980, No lot number info not possible to retrieve from collaborator         | N/A                             | 1/200       |

|                                              |                                             |                                               |                           |             |
|----------------------------------------------|---------------------------------------------|-----------------------------------------------|---------------------------|-------------|
| Rabbit polyclonal anti-Synapsin 1/2          | Synaptic Systems                            | Cat# 106 002, RRID:AB_887804, Lot 106002/16   | N/A                       | 1/2000      |
| Rabbit polyclonal anti-VGLUT2                | E Herzog                                    | Cat# VGLUT2, RRID:AB_2315563, Lot N/A         | N/A                       | 1/1000      |
| Rabbit polyclonal anti-Synaptopodin          | Synaptic Systems                            | Cat# 163 002, RRID:AB_887825, Lot 163002/7    | N/A                       | 1/800       |
| Rabbit polyclonal anti-VACHT                 | Synaptic Systems                            | Cat# 139 103, RRID:AB_887864, Lot 5-67        | N/A                       | 1/1000      |
| Rabbit polyclonal anti-VIAAT/VGATs           | Synaptic Systems                            | Cat# 131 002, RRID:AB_887871, Lot 31002/240   | N/A                       | 1/4000      |
| Rabbit polyclonal anti-DAT                   | Millipore                                   | Cat# AB2231, RRID: AB_1586991, Lot 3417479    | 1/100                     | 1/2000      |
| Rabbit polyclonal anti-EAAT1/GLAST           | Niels Christian Danbolt, University of Oslo | Cat# Ab#314, RRID:AB_2314561, Lot 1998-07-29  | 1/250                     | 1/10000     |
| Rabbit polyclonal anti-GluA1                 | Millipore                                   | Cat# AB1504, RRID:AB_2113602, Lot 2207172     | 1/50                      | N/A         |
| Rabbit polyclonal anti-GFP                   | Abcam                                       | Cat# ab290, RRID:AB_303395, Lot GR3251545-1   | N/A                       | 1/3000      |
| Rabbit polyclonal anti-Cpne7                 | OriGene                                     | Cat# TA334534, RRID: N/A, Lot QC28458/40659   | N/A                       | 1/500       |
| Rabbit polyclonal anti-Mint 1 Apba1          | Synaptic Systems                            | Cat# 144 103, RRID:AB_10635158, Lot 4         | N/A                       | 1/300       |
| Rabbit polyclonal anti-Cadps2                | Synaptic Systems                            | Cat# 262 103, RRID:AB_2619980, Lot 2          | N/A                       | 1/400       |
| Rabbit polyclonal anti-Syntaxin 4            | Synaptic Systems                            | Cat# 110 042, RRID:AB_887853, Lot 21          | N/A                       | 1/1000      |
| Rabbit polyclonal anti-Bassoon               | Synaptic Systems                            | Cat# 141 003, RRID:AB_887697, Lot 1-25        | N/A                       | 1/750       |
| Rabbit polyclonal anti-RIM1                  | Synaptic Systems                            | Cat# 140 013, RRID:AB_2238250, Lot 2-13       | N/A                       | 1/500       |
| Chicken polyclonal anti-Tyrosine hydroxylase | Millipore                                   | Cat# AB9702, RRID:AB_570923, Lot 3616562      | N/A                       | 1/1000      |
| Chicken polyclonal anti-GFP                  | Abcam                                       | Cat# ab13970, RRID:AB_300798, Lot GR3361051-2 | N/A                       | 1/3000      |
| Secondary Antibody                           | Source                                      | Identifier,                                   | WES (25 ng/μL of protein) | Immuno Fluo |
| Goat polyclonal Anti Mouse Alexa 488         | Thermo Fisher                               | Cat# A-11001, RRID: AB_2534069, Lot 2379467   | N/A                       | 1/500       |

|                                           |               |                                            |     |       |
|-------------------------------------------|---------------|--------------------------------------------|-----|-------|
| Goat polyclonal Anti Rabbit Alexa 568     | Thermo Fisher | Cat# A-11011, RRID:AB_143157, Lot 1778025  | N/A | 1/500 |
| Goat polyclonal Anti-Chicken Alexa 647    | Thermo Fisher | Cat# A-21449, RRID:AB_2535866, Lot 2186435 | N/A | 1/500 |
| Goat polyclonal Anti-Chicken Alexa 594    | Thermo Fisher | Cat# A-11042, RRID:AB_2534099, Lot 2181000 | N/A | 1/500 |
| Goat polyclonal Anti Rabbit Atto-647      | Sigma-Aldrich | Cat# 40839, RRID:AB_1137669, Lot BCCF3161  | N/A | 1/500 |
| Goat polyclonal Anti-Chicken Alexa 488    | Thermo Fisher | Cat# A-11039, RRID:AB_2534096, Lot 2304258 | N/A | 1/500 |
| Goat polyclonal Anti-Guinea Pig Alexa 647 | Thermo Fisher | Cat# A-21450, RRID:AB_2735091, Lot 2231672 | N/A | 1/500 |
| Goat polyclonal Anti-Mouse Alexa 647      | Thermo Fisher | Cat# A-21235, RRID:AB_2535804, Lot 2306581 | N/A | 1/500 |
| Goat polyclonal Anti-Mouse Alexa 568      | Thermo Fisher | Cat# A-11004, RRID:AB_2534072, Lot 1419715 | N/A | 1/500 |
| Goat polyclonal Anti Rabbit Alexa-647     | Thermo Fisher | Cat# A-21244, RRID:AB_2535812, Lot 1910774 | N/A | 1/500 |
| Goat polyclonal Anti Rabbit Alexa 488     | Thermo Fisher | Cat# A-11008, RRID:AB_143165, Lot 1705869  | N/A | 1/500 |

**Supplementary Table 2: Statistical Analysis**

| Figure  | Variable     | Condition       | (Mean $\pm$ SEM) N, n     | Source of Variation F (DFn, DFd) p value    | Post-Hoc P value summary     | Test              |  |  |
|---------|--------------|-----------------|---------------------------|---------------------------------------------|------------------------------|-------------------|--|--|
| Fig. 1d | Th           | H               | 1 $\pm$ 0.26; N = 3       | Interaction F8,36 = 0.2733 p = 0.9706       |                              | Two-way ANOVA     |  |  |
|         |              | P1              | 0.36 $\pm$ 0.07; N = 3    | Fraction F8,36 = 7.062 ****p<0.0001         |                              |                   |  |  |
|         |              | S2              | 0.77 $\pm$ 0.1; N = 3     | Protein F1,36 = 2.387 p = 0.1311            |                              |                   |  |  |
|         |              | P2              | 1.2 $\pm$ 0.27; N = 3     |                                             |                              |                   |  |  |
|         |              | Syn             | 1.5 $\pm$ 0.31; N = 3     |                                             |                              |                   |  |  |
|         |              | LS1             | 2.2 $\pm$ 0.19; N = 3     |                                             |                              |                   |  |  |
|         |              | SPM             | 0.26 $\pm$ 0.02; N = 3    |                                             |                              |                   |  |  |
|         |              | LS2             | 1.58 $\pm$ 0.32; N = 3    |                                             |                              |                   |  |  |
|         |              | LP2             | 0.82 $\pm$ 0.4; N = 3     |                                             |                              |                   |  |  |
|         |              |                 |                           |                                             |                              |                   |  |  |
|         |              |                 |                           |                                             |                              |                   |  |  |
|         |              |                 | GFP                       | H                                           | 1 $\pm$ 0.53; N = 3          |                   |  |  |
|         |              |                 |                           | P1                                          | 0.23 $\pm$ 0.09; N = 3       |                   |  |  |
|         |              |                 |                           | S2                                          | 0.49 $\pm$ 0.23; N = 3       |                   |  |  |
|         |              | P2              | 1.12 $\pm$ 0.52; N = 3    |                                             |                              |                   |  |  |
|         |              | Syn             | 1.48 $\pm$ 0.71; N = 3    |                                             |                              |                   |  |  |
|         |              | LS1             | 1.8 $\pm$ 0.5; N = 3      |                                             |                              |                   |  |  |
|         |              | SPM             | 0.07 $\pm$ 0.02; N = 3    |                                             |                              |                   |  |  |
|         |              | LS2             | 1.29 $\pm$ 0.22; N = 3    |                                             |                              |                   |  |  |
|         |              | LP2             | 0.03 $\pm$ 0.01; N = 3    |                                             |                              |                   |  |  |
| Fig. 1f | All Singlets | SYN             | 73.79 $\pm$ 4.608; N = 9  |                                             | *p = 0.0104                  | Mann-Whitney test |  |  |
|         |              | DA-FASS         | 83.91 $\pm$ 1.252; N = 8  |                                             |                              |                   |  |  |
|         | DA-FASS      | EGFP - Singlets | 30.94 $\pm$ 2.75; N = 8   | Interaction F1, 30 = 218.3 ****P<0.0001     | SYN - DA-FASS                | Two-way ANOVA     |  |  |
|         |              | EGFP + Singlets | 48.94 $\pm$ 2.30; N = 8   | Gating F1, 30 = 66.42 ****P<0.0001          | EGFP - Singlets ****p<0.0001 |                   |  |  |
|         | SYN          | EGFP - Singlets | 66.14 $\pm$ 3.97; N = 9   | Condition F1, 30 = 3.302 P = 0.0792         | EGFP + Singlets ****p<0.0001 |                   |  |  |
|         |              | EGFP + Singlets | 3.86 $\pm$ 0.53; N = 9    |                                             |                              |                   |  |  |
| Fig. 2c | EGFP-/Th+    | SYN             | 29,915 $\pm$ 4.65 n = 13  | Interaction F2, 96 = 65.04 ****p<0.0001     | SYN - DA-FASS                | Two-way ANOVA     |  |  |
|         |              | DA-FASS         | 10.027 $\pm$ 0.825 n = 21 | Condition F1, 96 = 0.03371 p = 0.8547       | EGFP-/Th+ ****p<0.0001       |                   |  |  |
|         |              |                 |                           | Immunolabelling F2, 96 = 510.3 ****p<0.0001 | EGFP+/Th+ ****p<0.0001       |                   |  |  |
|         | EGFP+/Th+    | SYN             | 57.400 $\pm$ 2.81 n = 13  |                                             | EGFP +/Th- p = 0.2534        |                   |  |  |

|         |             |         |                       |                                              |                          |               |
|---------|-------------|---------|-----------------------|----------------------------------------------|--------------------------|---------------|
|         |             | DA-FASS | 83.095 ± 1.131 n = 21 |                                              |                          |               |
|         |             |         |                       |                                              |                          |               |
|         | EGFP+/Th-   | SYN     | 11.772 ± 2.039 n = 13 |                                              |                          |               |
|         |             | DA-FASS | 6.882 ± 1.177 n = 21  |                                              |                          |               |
| Fig. 2g | EGFP-/D1R+  | SYN     | 86.81 ± 1.388 n = 12  | Interaction F2, 96 = 208,0 ****p<0,0001      | Singlets - FASS          | Two-way ANOVA |
|         |             | DA-FASS | 43.241 ± 2.035 n = 22 | Condition F1, 96 = 0,007420 p = 0,9315       | EGFP-/D1R+ ****p<0.0001  |               |
|         |             |         |                       | Immunolabelling F2, 96 = 437,9 ****p<0,0001  | EGFP+/D1R+ ****p<0.0001  |               |
|         | EGFP+/D1R+  | SYN     | 3.21 ± 0.715 n = 12   |                                              | EGFP+/D1R- ****p<0.0001  |               |
|         |             | DA-FASS | 28.585 ± 1.97 n = 22  |                                              |                          |               |
|         |             |         |                       |                                              |                          |               |
|         | EGFP+/D1R-  | SYN     | 9.496 ± 1.281 n = 12  |                                              |                          |               |
|         |             | DA-FASS | 28.081 ± 1.416 n = 22 |                                              |                          |               |
| Fig. 2k | EGFP-/D2R+  | SYN     | 72.19 ± 3.03 n = 32   | Interaction F2, 180 = 149.4 ****p<0.0001     | SYN - DA-FASS            | Two-way ANOVA |
|         |             | DA-FASS | 32.328 ± 2.42 n = 30  | Condition F1, 180 = 0.6714 p = 0.4136        | D2R+/EGFP- ****p<0.0001  |               |
|         |             |         |                       | Immunolabelling F2, 180 = 163.5 ****p<0.0001 | EGFP+/D2R+ ****p<0.0001  |               |
|         | EGFP+/D2R+  | SYN     | 15.20 ± 2.27 n = 32   |                                              | EGFP+/D2R- p = 0.1382    |               |
|         |             | DA-FASS | 53.24 ± 2.27 n = 30   |                                              |                          |               |
|         |             |         |                       |                                              |                          |               |
|         | EGFP+/D2R-  | SYN     | 8.18 ± 1.80 n = 32    |                                              |                          |               |
|         |             | DA-FASS | 14.55 ± 1.38 n = 30   |                                              |                          |               |
| Fig. 4b | Th-/Cpne7+  | SYN     | 42.61 ± 2.4 n = 31    | Interaction F2, 180 = 131.9 ****p<0.0001     | SYN - DA-FASS            | Two-way ANOVA |
|         |             | DA-FASS | 16.21 ± 1.28 n = 31   | Condition F1, 180 = 0.0004 p = 0.9841        | Th-/Cpne7+ ****p<0.0001  |               |
|         |             |         |                       | Immunolabelling F2, 180 = 570.4 ****p<0.0001 | Th+/Cpne7+ p = 0.9951    |               |
|         | Th+/Cpne7+  | SYN     | 8 ± 0.88 n = 31       |                                              | Th+/Cpne7- ****p<0.0001  |               |
|         |             | DA-FASS | 8.49 ± 0.44 n = 31    |                                              |                          |               |
|         |             |         |                       |                                              |                          |               |
|         | Th+/Cpne7-  | SYN     | 49.3 ± 2.35 n = 31    |                                              |                          |               |
|         |             | DA-FASS | 75.29 ± 1.32 n = 31   |                                              |                          |               |
| Fig. 4c | Th-/Mint-1+ | SYN     | 66.14 ± 3.09 n = 30   | Interaction F2, 183 = 163.7 ****p<0.0001     | SYN - DA-FASS            | Two-way ANOVA |
|         |             | DA-FASS | 29.92 ± 1.27 n = 33   | Condition F1, 183 = 0.0009 p = 0.9754        | Th-/Mint-1+ ****p<0.0001 |               |
|         |             |         |                       | Immunolabelling F2, 183 = 316.5 ****p<0.0001 | Th+/Mint-1+ p = 0.2048   |               |
|         | Th+/Mint-1+ | SYN     | 3.56 ± 0.5 n = 30     |                                              | Th+/Mint-1- ****p<0.0001 |               |

|         |                 |         |                     |                                              |                            |               |
|---------|-----------------|---------|---------------------|----------------------------------------------|----------------------------|---------------|
|         |                 | DA-FASS | 8.35 ± 0.65 n = 33  |                                              |                            |               |
|         | Th+/Min t-1-    | SYN     | 30.05 ± 2.99 n = 30 |                                              |                            |               |
|         |                 | DA-FASS | 61.34 ± 1.33 n = 33 |                                              |                            |               |
| Fig. 4d | Th- /Cadps2+    | SYN     | 57.71 ± 3.33 n = 30 | Interaction F2, 187 = 110.5 ****p<0.0001     | SYN - DA-FASS              | Two-way ANOVA |
|         |                 | DA-FASS | 22.63 ± 1.1 n = 34  | Condition F1, 187 = 0.004 p = 0.9511         | Th-/Cadps2+ ****p<0.0001   |               |
|         |                 |         |                     | Immunolabelling F2, 187 = 88.12 ****p<0.0001 | Th+/Cadps2 + *p=0.0434     |               |
|         | Th+/Cad ps2+    | SYN     | 12.99 ± 1.65 n = 30 |                                              | Th+/Cadps2- ****p<0.0001   |               |
|         |                 | DA-FASS | 20.54 ± 1.49 n = 34 |                                              |                            |               |
|         | Th+/Cad ps2-    | SYN     | 28.97 ± 3.41 n = 31 |                                              |                            |               |
|         |                 | DA-FASS | 56.83 ± 1.11 n = 34 |                                              |                            |               |
| Fig. 4e | DAT- /SynCAM2+  | SYN     | 53.18 ± 2.38 n = 12 | Interaction F2, 60 = 84.92 ****p<0.0001      | SYN - DA-FASS              | Two-way ANOVA |
|         |                 | DA-FASS | 18.87 ± 3.05 n = 10 | Condition F1, 60 = 4.371e-005 p = 0.9947     | DAT-/SynCAM2+ ****p<0.0001 |               |
|         |                 |         |                     | Immunolabelling F2, 60 = 73.75 ****p<0.0001  | DAT+/SynCam2+ ****p<0.0001 |               |
|         | DAT+/S ynCam2 + | SYN     | 28.69 ± 1.56 n = 12 |                                              | DAT+/SynCam2- p = 0.1265   |               |
|         |                 | DA-FASS | 71.76 ± 5.67 n = 10 |                                              |                            |               |
|         | DAT+/S ynCam2-  | SYN     | 18.18 ± 1.93 n = 12 |                                              |                            |               |
|         |                 | DA-FASS | 9.37 ± 2.81 n = 10  |                                              |                            |               |
| Fig. 4f | Th- /Stx4+      | SYN     | 62.45 ± 3.11 n = 31 | Interaction F2, 177 = 69.25 ****p<0.0001     | SYN - DA-FASS              | Two-way ANOVA |
|         |                 | DA-FASS | 29.18 ± 1.74 n = 30 | Condition F1, 177 = 0.004 p = 0.9497         | Th-/Stx4+ ****p<0.0001     |               |
|         |                 |         |                     | Immunolabelling F2, 177 = 49.15 ****p<0.0001 | Th+/Stx4+ ****p<0.0001     |               |
|         | Th+/Stx4 +      | SYN     | 7.16 ± 1.22 n = 31  |                                              | Th+/Stx4- p = 0.1185       |               |
|         |                 | DA-FASS | 33.31 ± 3.08 n = 30 |                                              |                            |               |
|         | Th+/Stx4 -      | SYN     | 30 ± 2.66 n = 31    |                                              |                            |               |
|         |                 | DA-FASS | 37.51 ± 3.06 n = 30 |                                              |                            |               |
| Fig. 4g | Th- /Mgll+      | SYN     | 31.18 ± 2.17 n = 33 | Interaction F2, 192 = 98.57 ****p<0.0001     | SYN - DA-FASS              | Two-way ANOVA |
|         |                 | DA-FASS | 8.83 ± 0.57 n = 33  | Condition F1, 192 = 4.217e-005 p = 0.9948    | Th-/Mgll+ ****p<0.0001     |               |
|         |                 |         |                     | Immunolabelling F2, 192 = 1242 ****p<0.0001  | Th+/Mgll+ **p = 0.0015     |               |

|         |                       |         |                     |                                             |                               |               |
|---------|-----------------------|---------|---------------------|---------------------------------------------|-------------------------------|---------------|
|         | Th+/Mgl<br>l+         | SYN     | 3.22 ± 0.54 n = 33  |                                             | Th+/Mgll- ****p<0.0001        |               |
|         |                       | DA-FASS | 10.28 ± 0.95 n = 33 |                                             |                               |               |
|         | Th+/Mgl<br>l-         | SYN     | 65.48 ± 2.08 n = 33 |                                             |                               |               |
|         |                       | DA-FASS | 80.79 ± 1.17 n = 33 |                                             |                               |               |
| Fig. 5b | Synapsin<br>+/EGFP-   | SYN     | 83.2 ± 1.06 n = 9   | Interaction F2, 51 = 237,8 ****p<0.0001     | SYN - DA-FASS                 | Two-way ANOVA |
|         |                       | DA-FASS | 33.78 ± 2.38 n = 10 | Condition F1, 51 = 0,01020 p = 0.9199       | EGFP-/Synapsin+ ****p<0.0001  |               |
|         |                       |         |                     | Immunolabelling F2, 51 = 237,5 ****p<0.0001 | EGFP+/Synapsin+ ****p<0.0001  |               |
|         | EGFP+/S<br>ynapsin+   | SYN     | 6.62 ± 1.15 n = 9   |                                             | EGFP+/Synapsin- ***p = 0.0006 |               |
|         |                       | DA-FASS | 44.88 ± 3.31 n = 10 |                                             |                               |               |
|         | EGFP+/S<br>ynapsin-   | SYN     | 9.64 ± 1.43 n = 9   |                                             |                               |               |
|         |                       | DA-FASS | 21.31 ± 1.6 n = 10  |                                             |                               |               |
| Fig. 5d | EGFP-<br>/VGLUT<br>1+ | SYN     | 76.23 ± 1.62 n = 12 | Interaction F2, 63 = 91,49 ****p<0.0001     | SYN - DA-FASS                 | Two-way ANOVA |
|         |                       | DA-FASS | 30.93 ± 4.53 n = 11 | Condition F1, 63 = 0,002 p = 0.9695         | EGFP-/VGLUT1+ ****p<0.0001    |               |
|         |                       |         |                     | Immunolabelling F2, 63 = 92,06 ****p<0.0001 | EGFP+/VGLUT1+ **p = 0.0022    |               |
|         | EGFP+/<br>VGLUT<br>1+ | SYN     | 5.92 ± 1.39 n = 12  |                                             | EGFP+/VGLUT1- ****p<0.0001    |               |
|         |                       | DA-FASS | 20.78 ± 2.68 n = 11 |                                             |                               |               |
|         | EGFP+/<br>VGLUT<br>1- | SYN     | 17.8 ± 1.68 n = 12  |                                             |                               |               |
|         |                       | DA-FASS | 48.52 ± 4.61 n = 11 |                                             |                               |               |
| Fig. 5f | EGFP-<br>/VIAAT<br>+  | SYN     | 68.19 ± 3.24 n = 9  | Interaction F2, 78 = 54,90 ****p<0.0001     | SYN - DA-FASS                 | Two-way ANOVA |
|         |                       | DA-FASS | 25.93 ± 1.9 n = 19  | Condition F1, 78 = 0,04 p = 0.8438          | EGFP-/VIAAT+ ****p<0.0001     |               |
|         |                       |         |                     | Immunolabelling F2, 78 = 55,34 ****p<0.0001 | EGFP+/VIAAT+ *p = 0.0158      |               |
|         | EGFP+/<br>VIAAT+      | SYN     | 4.11 ± 0.92 n = 9   |                                             | EGFP+/VIAAT- ****p<0.0001     |               |
|         |                       | DA-FASS | 18.76 ± 3.22 n = 19 |                                             |                               |               |
|         | EGFP+/<br>VIAAT-      | SYN     | 25.96 ± 2.72 n = 9  |                                             |                               |               |
|         |                       | DA-FASS | 55.32 ± 4.28 n = 19 |                                             |                               |               |

|         |                          |                 |                            |                                                 |                                    |                     |
|---------|--------------------------|-----------------|----------------------------|-------------------------------------------------|------------------------------------|---------------------|
| Fig. 5h | Th-<br>/VChT<br>+        | SYN             | 62.5 ± 2.08 n = 30         | Interaction F2, 144 =<br>180,3 ****p<0.0001     | SYN - DA-<br>FASS                  | Two-way<br>ANOVA    |
|         |                          | DA-FASS         | 28.01 ± 1.34 n =<br>20     | Condition F1, 144 =<br>0,01571 p = 0.9004       | Th-/VChT+ ****p<0.0001             |                     |
|         |                          |                 |                            | Immunolabelling F2, 144<br>= 412,2 ****p<0.0001 | Th+/VChT+ ***p = 0.0011            |                     |
|         | Th+/VA<br>ChT+           | SYN             | 1.68 ± 0.37 n = 30         |                                                 | Th+/VChT- ****p<0.0001             |                     |
|         |                          | DA-FASS         | 10.19 ± 0.65 n =<br>20     |                                                 |                                    |                     |
|         |                          |                 |                            |                                                 |                                    |                     |
|         | Th+/VA<br>ChT-           | SYN             | 35.23 ± 2.18 n =<br>30     |                                                 |                                    |                     |
|         |                          | DA-FASS         | 61.71 ± 1.19 n =<br>20     |                                                 |                                    |                     |
|         |                          |                 |                            |                                                 |                                    |                     |
| Fig. 6a | Th                       | DA-FASS         | 0.1742 ± 0.003 n<br>= 1175 | ****p<0.0001                                    | Th -<br>Labelling                  | Kruskal-<br>Wallis  |
|         | Syncam2                  | DA-FASS         | 0.2852 ± 0.006 n<br>= 949  |                                                 | Th vs. Syncam2<br>****p<0.0001     |                     |
|         | D2R                      | DA-FASS         | 0.2982 ± 0.015 n<br>= 181  |                                                 | Th vs. D2R ****p<0.0001            |                     |
|         | VChT                     | DA-FASS         | 0.3182 ± 0.017 n<br>= 151  |                                                 | Th vs. VChT<br>****p<0.0001        |                     |
|         | VGLUT<br>1               | DA-FASS         | 0.3813 ± 0.017 n<br>= 193  |                                                 | Th vs. VGLUT1<br>****p<0.0001      |                     |
|         | VIAAT                    | DA-FASS         | 0.3982 ± 0.015 n<br>= 362  |                                                 | Th vs. VIAAT<br>****p<0.0001       |                     |
|         | VGLUT<br>2               | DA-FASS         | 0.4077 ± 0.019 n<br>= 150  |                                                 | Th vs. VGLUT2<br>****p<0.0001      |                     |
|         | Stx4                     | DA-FASS         | 0.4965 ± 0.009 n<br>= 880  |                                                 | Th vs. Stx4 ****p<0.0001           |                     |
|         | D1R                      | DA-FASS         | 0.5126 ± 0.022 n<br>= 246  |                                                 | Th vs. D1R ****p<0.0001            |                     |
|         |                          |                 |                            |                                                 |                                    |                     |
|         |                          |                 |                            |                                                 |                                    |                     |
|         |                          |                 |                            |                                                 |                                    |                     |
| Fig. 7b | VGLUT<br>1venus-<br>/Th+ | SYN             | 55.06 ± 3.19 n =<br>19     | Interaction F2,111 =<br>47,14 ****p<0.0001      | SYN -<br>VGLUT1-<br>FASS           | Two-way<br>ANOVA    |
|         |                          | VGLUT1-<br>FASS | 22.03 ± 1.55 n =<br>20     | Condition F1, 111 =<br>0,002573 p = 0.9596      | VGLUT1venus- /Th+<br>****p<0.0001  |                     |
|         |                          |                 |                            | Immunolabelling F2, 111<br>= 15,54 ****p<0.0001 | VGLUT1venus+ /Th+ ***p<br>= 0.0006 |                     |
|         | VGLUT<br>1venus+<br>/Th+ | SYN             | 15.46 ± 2.6 n = 19         |                                                 | VGLUT1venus+ /Th- ***p<br>= 0.0002 |                     |
|         |                          | VGLUT1-<br>FASS | 31.5 ± 4.02 n = 20         |                                                 |                                    |                     |
|         |                          |                 |                            |                                                 |                                    |                     |
|         | VGLUT<br>1venus+<br>/Th- | SYN             | 28.14 ± 2.6 n = 19         |                                                 |                                    |                     |
|         |                          | VGLUT1-<br>FASS | 45.5 ± 3.16 n = 20         |                                                 |                                    |                     |
| Fig. 7c | Th                       | SYN             | 437200 ±<br>79456.71 n = 3 |                                                 | p = 0.5839                         | Unpaired t-<br>test |



|         |                                         |                              |                               |                                                 |                                        |                        |
|---------|-----------------------------------------|------------------------------|-------------------------------|-------------------------------------------------|----------------------------------------|------------------------|
|         |                                         | VGLUT1-<br>FASS              | 357648 ±<br>107551.79 n = 3   |                                                 |                                        |                        |
|         | VGLUT<br>1venus                         | SYN                          | 391944.33 ±<br>60156.53 n = 3 |                                                 | *p = 0.0431                            |                        |
|         |                                         | VGLUT1-<br>FASS              | 670425.33 ±<br>73824.66 n = 3 |                                                 |                                        |                        |
| Fig. 7d | VGLUT1venus+                            |                              |                               |                                                 |                                        |                        |
|         |                                         | Th-                          | 143489 ± 2037 n<br>= 3609     | ****p<0.0001                                    |                                        | Mann<br>Whitney        |
|         |                                         | Th+                          | 182796 ± 4513 n<br>= 1206     | ****p<0.0001                                    |                                        | Kolmogorov<br>-Smirnov |
|         | Bassoon+                                |                              |                               |                                                 |                                        |                        |
|         |                                         | Th-                          | 143489 ± 2037 n<br>= 3609     | ****p<0.0001                                    |                                        | Mann<br>Whitney        |
|         |                                         | Th+                          | 182796 ± 4513 n<br>= 1206     | ****p<0.0001                                    |                                        | Kolmogorov<br>-Smirnov |
| Fig. 7e |                                         |                              |                               |                                                 |                                        |                        |
|         | Th+/VG<br>LUT1+                         | Th_Bassoo<br>n+              | 39,67 ± 4,055 n =<br>84       |                                                 |                                        | descriptive            |
|         |                                         | Th_Bassoo<br>n-              | 60,33 ± 4,055 n =<br>82       |                                                 |                                        | descriptive            |
|         | Bassoon<br>+                            | Th_Bassoo<br>n+              | 65498.8 ± 6546 n<br>= 84      |                                                 |                                        |                        |
|         |                                         | VGLUT1v<br>enus Bass<br>oon+ | 255181.0 ± 24922<br>n = 82    | ****p<0.0001                                    |                                        | Mann<br>Whitney        |
| Fig. 7f |                                         |                              |                               |                                                 |                                        |                        |
|         | Homer+                                  |                              |                               |                                                 |                                        |                        |
|         |                                         | Th-                          | 55356 ± 1052 n =<br>1877      | ****p<0.0001                                    |                                        | Mann<br>Whitney        |
|         |                                         | Th+                          | 64756 ± 1385 n =<br>1536      | ****p<0.0001                                    |                                        | Kolmogorov<br>-Smirnov |
| Fig. 7g |                                         |                              |                               |                                                 |                                        |                        |
|         | PSD95+                                  |                              |                               |                                                 |                                        |                        |
|         |                                         | Th-                          | 21758 ± 471.1 n =<br>2232     | ****p<0.0001                                    |                                        | Mann<br>Whitney        |
|         |                                         | Th+                          | 20149 ± 580.9 n =<br>1533     | ***p = 0.0004                                   |                                        | Kolmogorov<br>-Smirnov |
| Fig. 7h | Synaptopodin1+                          |                              |                               |                                                 |                                        |                        |
|         |                                         | Th-                          | 213786 ± 6158 n<br>= 1528     | **p = 0.0015                                    |                                        | Mann<br>Whitney        |
|         |                                         | Th+                          | 382663 ± 36567 n<br>= 725     | *p = 0.0272                                     |                                        | Kolmogorov<br>-Smirnov |
| Fig. 7i | VGLUT<br>1venus+/<br>Synaptop<br>odin1- | Th-                          | 68.71 ± 1.17 n =<br>81        | Interaction F1, 320 =<br>95,48 ****p<0.0001     | Th- - Th+                              | Two-way<br>ANOVA       |
|         |                                         | Th+                          | 54.63 ± 1.7 n = 81            | Condition F1, 320 =<br>0,1688 p = 0.6815        | VGLUT1+ ****p<0.0001                   |                        |
|         |                                         |                              |                               | Immunolabelling F1, 320<br>= 326,0 ****p<0.0001 | VGLUT1+ Synaptopodin1+<br>****p<0.0001 |                        |
|         | VGLUT<br>1venus+/<br>Synaptop<br>odin1- | Th-                          | 30.22 ± 0.92 n =<br>81        |                                                 |                                        |                        |

|                      |                   |                  |                       |                                              |                                |                 |
|----------------------|-------------------|------------------|-----------------------|----------------------------------------------|--------------------------------|-----------------|
|                      | Synaptopodin1+    |                  |                       |                                              |                                |                 |
|                      |                   | Th+              | 43.17 ± 1.6 n = 81    |                                              |                                |                 |
| Supplementary Fig.4  | EGFP-/VGLUT 2+    | SYN              | 44.55 ± 4.57 n = 6    | Interaction F2, 54 = 80,90 ****p<0.0001      | Singlets - FASS                | Two-way ANOVA   |
|                      |                   | DA-FASS          | 8.57 ± 1.53 n = 14    | Condition F1, 54 = 0,0001 p = 0.9912         | VGLUT1+ ****p<0.0001           |                 |
|                      |                   |                  |                       | Immunolabelling F2, 54 = 293,7 ****p<0.0001  | ++ *p = 0.0332                 |                 |
|                      | EGFP+/VGLUT 2+    | SYN              | 1.79 ± 1.14 n = 6     |                                              | EGFP+ ****p<0.0001             |                 |
|                      |                   | DA-FASS          | 11.22 ± 1.38 n = 14   |                                              |                                |                 |
|                      | EGFP+/VGLUT 2-    | SYN              | 53.65 ± 4.29 n = 6    |                                              |                                |                 |
|                      |                   | DA-FASS          | 80.13 ± 2.27 n = 14   |                                              |                                |                 |
| Supplementary Fig.5e | All Singlets      | SYN              | 81.68 ± 0.7955 N = 10 |                                              | *p = 0.0198                    | Unpaired t test |
|                      |                   | VGLUT1-FASS      | 86.05 ± 1.468 N = 11  |                                              |                                |                 |
|                      | SYN               | VENUS - Singlets | 52.71 ± 4.38 N = 10   | Interaction F1, 38 = 72.11 ****p<0.0001      | SYN - VGLUT1-FASS              | Two-way ANOVA   |
|                      |                   | VENUS + Singlets | 18.48 ± 3.08 N = 10   | Gating F1, 38 = 0.6683 p = 0.4187            | VENUS - Singlets ****p<0.0001  |                 |
|                      | VGLUT 1-FASS      | VENUS - Singlets | 23.85 ± 3.053 N = 11  | Condition F1, 38 = 0.4118 p = 0.5249         | VENUS + Singlets ****p<0.0001  |                 |
|                      |                   | VENUS + Singlets | 52,06 ± 4,02 N = 11   |                                              |                                |                 |
| Supplementary Fig.6a |                   |                  |                       |                                              |                                |                 |
|                      | Bassoon           | VGLUT1+          | 93,37 ± 0,40 n = 4456 |                                              |                                |                 |
|                      |                   | VGLUT1-/Th+      | 19,57 ± 3,73 n = 45   |                                              |                                | descriptive     |
| Supplementary Fig.6b | Th+/Synaptopodin- | SYN              | 36.51 ± 1.49 n = 49   | Interaction F2, 255 = 251,5 ****p<0.0001     | Singlets - FASS                | Two-way ANOVA   |
|                      |                   | DA-FASS          | 66.65 ± 0.95 n = 38   | Condition F1, 255 = 7,774e-006 p = 0.9978    | Th+/Synaptopodin- ****p<0.0001 |                 |
|                      |                   |                  |                       | Immunolabelling F2, 255 = 297,4 ****p<0.0001 | Th+/Synaptopodin+ p = 0.9576   |                 |
|                      | Th+/Synaptopodin+ | SYN              | 18.59 ± 1.51 n = 49   |                                              | Th-/Synaptopodin+ ****p<0.0001 |                 |
|                      |                   | DA-FASS          | 19.47 ± 0.84 n = 38   |                                              |                                |                 |
|                      |                   |                  |                       |                                              |                                |                 |

|                             |                           |                 |                            |               |  |                 |
|-----------------------------|---------------------------|-----------------|----------------------------|---------------|--|-----------------|
|                             | Th-<br>/Synapto<br>podin+ | SYN             | 44.91 ± 1.72 n = 49        |               |  |                 |
|                             |                           | DA-FASS         | 13.9 ± 0.58 n = 38         |               |  |                 |
|                             |                           |                 |                            |               |  |                 |
| Supple<br>mentary<br>Fig.6c | Th                        | RIM1+           | 69,67 ± 4,3 n = 73         |               |  |                 |
|                             |                           | RIM1-           | 30,33 ± 4,3 n = 73         |               |  | descriptive     |
|                             |                           |                 |                            |               |  |                 |
|                             | RIM1+                     | Th              | 31886 ± 2739 n = 73        |               |  |                 |
|                             |                           | VGLUT1v<br>enus | 255181.0 ± 24922<br>n = 74 | ***p = 0.0009 |  | Mann<br>Whitney |
|                             |                           |                 |                            |               |  |                 |

**Supplementary Table 3: Proteomics Dataset**

| Accession   | Coverage [%] | # Unique Peptides | Score Sequest HT: Sequest HT | Entrez Gene ID | Gene Symbol | # Razor Peptides | Abundance Ratio: (DA-FASS) / (SYN) | Abundance Ratio Adj. P-Value: (DA-FASS) / (SYN) |
|-------------|--------------|-------------------|------------------------------|----------------|-------------|------------------|------------------------------------|-------------------------------------------------|
| P16546      | 65           | 195               | 5133,76                      |                | Sptan1      | 0                | 1,22                               | 6,95E-01                                        |
| Q62261      | 60           | 150               | 2762,32                      | 20742          | Sptbn1      | 7                | 1,07                               | 9,67E-01                                        |
| Q9JHU4      | 42           | 196               | 1648,46                      | 13424          | Dync1h1     | 0                | 1,25                               | 6,06E-01                                        |
| Q68FD5      | 51           | 91                | 4778,24                      | 67300          | Cltc        | 0                | 1,14                               | 8,70E-01                                        |
| K2C1_HUMAN  | 70           | 44                | 11983,21                     |                |             | 12               | 1,26                               | 5,95E-01                                        |
| Q9QXS1      | 43           | 197               | 1059                         | 18810          | Plec        | 3                | 1,15                               | 8,37E-01                                        |
| Q6PIC6      | 56           | 39                | 4985,81                      | 232975         | Atp1a3      | 3                | 1,10                               | 9,34E-01                                        |
| K22E_HUMAN  | 81           | 51                | 8081,59                      |                |             | 14               | 1,34                               | 3,61E-01                                        |
| Q61879      | 53           | 101               | 1111,52                      | 77579          | Myh10       | 19               | 1,06                               | 9,74E-01                                        |
| Q8VDN2      | 51           | 37                | 3378,23                      | 11928          | Atp1a1      | 0                | 0,98                               | 9,81E-01                                        |
| Q6PIE5      | 54           | 39                | 3610,82                      | 98660          | Atp1a2      | 27               | 1,01                               | 1,00E+00                                        |
| G5E829      | 44           | 30                | 2356,23                      | 67972          | Atp2b1      | 5                | 0,93                               | 9,36E-01                                        |
| Q9QYX7      | 32           | 123               | 662,32                       | 26875          | Pclo        | 4                | 0,98                               | 9,79E-01                                        |
| Q9R0K7      | 46           | 36                | 2109,59                      | 11941          | Atp2b2      | 24               | 1,02                               | 9,90E-01                                        |
| O88737      | 39           | 101               | 978,92                       | 12217          | Bsn         | 1                | 0,90                               | 8,85E-01                                        |
| P39053      | 61           | 49                | 2052,86                      | 13429          | Dnm1        | 16               | 1,00                               | 9,97E-01                                        |
| Q8C8R3      | 35           | 96                | 1041,55                      | 109676         | Ank2        | 13               | 1,31                               | 4,46E-01                                        |
| O88935      | 58           | 27                | 1933,82                      | 20964          | Syn1        | 6                | 1,03                               | 9,85E-01                                        |
| K1C10_HUMAN | 60           | 26                | 8256,42                      |                |             | 20               | 1,27                               | 5,46E-01                                        |
| E9Q557      | 30           | 112               | 1229,56                      | 109620         | Dsp         | 0                | 1,03                               | 9,86E-01                                        |
| P63017      | 64           | 29                | 2583,46                      | 15481          | Hspa8       | 14               | 1,09                               | 9,42E-01                                        |
| P56480      | 48           | 21                | 3232,08                      | 11947          | Atp5f1b     | 0                | 0,73                               | 2,60E-01                                        |
| O08599      | 64           | 45                | 1984,97                      | 20910          | Stxbp1      | 1                | 0,93                               | 9,56E-01                                        |
| Q7TMM9      | 62           | 2                 | 4324,27                      | 22151          | Tubb2a      | 8                | 1,11                               | 9,21E-01                                        |
| Q99104      | 41           | 85                | 1194,19                      | 17918          | Myo5a       | 0                | 1,16                               | 8,10E-01                                        |
| O08553      | 60           | 26                | 2077,38                      | 12934          | Dpysl2      | 5                | 0,98                               | 9,77E-01                                        |
| Q9CWF2      | 62           | 2                 | 4244,39                      | 73710          | Tubb2b      | 0                | 1,09                               | 9,43E-01                                        |
| K1C9_HUMAN  | 76           | 38                | 5136,35                      |                |             | 0                | 0,81                               | 6,07E-01                                        |
| Q8BPN8      | 31           | 80                | 584,48                       | 235380         | Dmxl2       | 2                | 1,18                               | 7,79E-01                                        |
| P60710      | 74           | 2                 | 3031,11                      | 11461          | Actb        | 36               | 0,98                               | 9,85E-01                                        |
| Q9D6F9      | 62           | 8                 | 3899,35                      | 22153          | Tubb4a      | 0                | 1,14                               | 8,70E-01                                        |
| Q64332      | 42           | 18                | 1553,11                      | 20965          | Syn2        | 1                | 1,03                               | 9,85E-01                                        |
| P99024      | 61           | 4                 | 4269,14                      | 22154          | Tubb5       | 2                | 1,19                               | 7,50E-01                                        |
| P50516      | 55           | 34                | 1557,11                      | 11964          | Atp6v1a     | 0                | 1,16                               | 8,10E-01                                        |
| Q8CAQ8      | 58           | 45                | 1065,87                      | 76614          | Immt        | 0                | 0,97                               | 9,76E-01                                        |
| Q9DBG3      | 47           | 23                | 1220,75                      | 71770          | Ap2b1       | 29               | 1,09                               | 9,44E-01                                        |
| Q9ERD7      | 54           | 10                | 3304,9                       | 22152          | Tubb3       | 1                | 1,62                               | 2,37E-02                                        |
| P14873      | 36           | 68                | 554,4                        | 17755          | Map1b       | 1                | 1,05                               | 9,76E-01                                        |

|        |    |    |         |                  |                   |    |      |          |
|--------|----|----|---------|------------------|-------------------|----|------|----------|
| P16858 | 56 | 21 | 1474,42 | 14433            | Gapdh             | 0  | 0,94 | 9,60E-01 |
| P46460 | 54 | 52 | 1764,79 | 18195            | Nsf               | 0  | 1,19 | 7,50E-01 |
| Q99KI0 | 51 | 39 | 1535,43 | 11429            | Aco2              | 0  | 0,69 | 1,22E-01 |
| P13595 | 43 | 37 | 1553,74 | 17967            | Ncam1             | 0  | 1,07 | 9,69E-01 |
| P17426 | 49 | 35 | 1372,25 | 11771            | Ap2a1             | 13 | 1,14 | 8,53E-01 |
| P17182 | 62 | 28 | 1288,7  | 13806;<br>433182 | Eno1              | 2  | 0,95 | 9,74E-01 |
| Q9Z1G4 | 35 | 30 | 1264,68 | 11975            | Atp6v0a1          | 0  | 1,02 | 9,96E-01 |
| Q80TJ1 | 45 | 40 | 785,32  | 27062            | Cadps             | 8  | 1,06 | 9,74E-01 |
| Q7TSJ2 | 67 | 53 | 1015,41 | 17760            | Map6              | 0  | 1,24 | 6,37E-01 |
| P17710 | 43 | 43 | 1363,22 | 15275            | Hk1               | 6  | 1,05 | 9,76E-01 |
| Q4ACU6 | 48 | 65 | 855,92  | 58234            | Shank3            | 2  | 1,20 | 7,46E-01 |
| Q62108 | 40 | 32 | 1028,69 | 13385            | Dlg4              | 2  | 0,97 | 9,76E-01 |
| Q91VD9 | 53 | 37 | 1182,94 | 227197           | Ndufs1            | 0  | 0,80 | 5,69E-01 |
| P68369 | 59 | 9  | 3054,9  | 22142            | Tuba1a            | 23 | 0,96 | 9,74E-01 |
| P12960 | 43 | 39 | 964,72  | 12805            | Cntn1             | 0  | 1,13 | 8,86E-01 |
| Q7TPR4 | 54 | 24 | 711,66  | 109711           | Actn1             | 4  | 1,15 | 8,41E-01 |
| P17427 | 45 | 29 | 1191,78 | 11772            | Ap2a2             | 0  | 1,10 | 9,34E-01 |
| P52480 | 63 | 32 | 1241,64 | 18746            | Pkm               | 0  | 0,91 | 9,19E-01 |
| P05064 | 70 | 27 | 1254,57 | 11674            | Aldoa             | 3  | 1,32 | 4,17E-01 |
| P68368 | 53 | 8  | 2672,45 | 22145            | Tuba4a            | 0  | 0,72 | 1,98E-01 |
| P60879 | 76 | 21 | 1318,03 | 20614            | Snap25            | 2  | 1,19 | 7,51E-01 |
| P19096 | 27 | 61 | 561,73  | 14104            | Fasn              | 0  | 1,15 | 8,42E-01 |
| P58281 | 50 | 47 | 848,68  | 74143            | Opa1              | 0  | 0,69 | 1,40E-01 |
| Q9WV92 | 56 | 42 | 688,09  | 13823            | Epb4113           | 4  | 1,02 | 9,94E-01 |
| P07901 | 45 | 25 | 1185,58 | 15519            | Hsp90aa1          | 0  | 1,09 | 9,42E-01 |
| P11499 | 47 | 25 | 1124,89 | 15516            | Hsp90ab1          | 19 | 1,04 | 9,77E-01 |
| P38647 | 51 | 34 | 756,38  | 15526            | Hspa9             | 0  | 0,84 | 7,39E-01 |
| Q61316 | 59 | 39 | 702,35  |                  | Hspa4             | 6  | 1,08 | 9,56E-01 |
| P61264 | 56 | 20 | 1178,54 | 56216            | Stx1b             | 0  | 0,98 | 9,79E-01 |
| P05214 | 46 | 6  | 2715,95 | 22144;<br>22147  | Tuba3a;<br>Tuba3b | 0  | 1,08 | 9,56E-01 |
| Q03265 | 56 | 33 | 1879,62 | 11946            | Atp5fla           | 0  | 0,93 | 9,41E-01 |
| Q02053 | 34 | 33 | 729,61  | 22201            | Uba1              | 0  | 1,15 | 8,37E-01 |
| Q6Q477 | 27 | 18 | 1133,86 | 381290           | Atp2b4            | 0  | 0,95 | 9,64E-01 |
| P06837 | 85 | 21 | 814,43  | 14432            | Gap43             | 0  | 1,22 | 6,82E-01 |
| P46096 | 52 | 19 | 1283,36 | 20979            | Syt1              | 13 | 1,14 | 8,66E-01 |
| P63038 | 53 | 35 | 1107,96 | 15510            | Hspd1             | 0  | 1,04 | 9,76E-01 |
| Q4KMM3 | 56 | 42 | 526,02  | 170719           | Oxr1              | 0  | 0,83 | 6,74E-01 |
| Q02257 | 48 | 28 | 1188,43 | 16480            | Jup               | 7  | 1,02 | 9,94E-01 |
| Q04447 | 55 | 19 | 1249,15 | 12709            | Ckb               | 0  | 0,85 | 7,49E-01 |
| Q920I9 | 39 | 52 | 692,76  | 104082           | Wdr7              | 0  | 1,10 | 9,23E-01 |
| Q922U2 | 36 | 14 | 3490,83 | 110308           | Krt5              | 9  | 0,97 | 9,76E-01 |
| P62259 | 78 | 22 | 1216,67 | 22627            | Ywhae             | 3  | 0,86 | 7,86E-01 |
| O55143 | 39 | 41 | 973,84  | 11938            | Atp2a2            | 0  | 0,98 | 9,80E-01 |
| Q61781 | 43 | 3  | 2944,49 | 16664            | Krt14             | 10 | 1,15 | 8,42E-01 |
| Q61644 | 73 | 36 | 774,14  | 23969            | Pacsin1           | 0  | 0,93 | 9,42E-01 |
| Q8CHC4 | 39 | 51 | 754,53  |                  | Synj1             | 0  | 1,17 | 8,09E-01 |

|                |    |    |         |        |          |    |      |          |
|----------------|----|----|---------|--------|----------|----|------|----------|
| O35643         | 41 | 19 | 865,02  | 11764  | Ap1b1    | 0  | 1,02 | 9,94E-01 |
| Q71LX4         | 33 | 54 | 267,65  | 70549  | Tln2     | 8  | 1,11 | 9,19E-01 |
| Q76MZ3         | 48 | 24 | 725,24  | 51792  | Ppp2r1a  | 0  | 1,03 | 9,83E-01 |
| P24549         | 48 | 19 | 678,88  | 11668  | Aldh1a1  | 12 | 3,45 | 6,00E-14 |
| P28652         | 49 | 15 | 1057,84 | 12323  | Camk2b   | 9  | 1,02 | 9,91E-01 |
| P57780         | 53 | 27 | 555,74  | 60595  | Actn4    | 18 | 0,91 | 9,12E-01 |
| Q91XM9         | 46 | 31 | 610,04  | 23859  | Dlg2     | 7  | 0,95 | 9,70E-01 |
| Q8VDD5         | 28 | 44 | 325,18  | 17886  | Myh9     | 1  | 0,86 | 7,77E-01 |
| P62814         | 56 | 27 | 1004,09 | 11966  | Atp6v1b2 | 0  | 1,18 | 7,79E-01 |
| P50396         | 66 | 20 | 679,87  | 14567  | Gdi1     | 9  | 0,95 | 9,74E-01 |
| Q62420         | 48 | 13 | 811,31  | 20404  | Sh3gl2   | 7  | 1,04 | 9,76E-01 |
| Q64521         | 47 | 36 | 664,19  | 14571  | Gpd2     | 0  | 0,90 | 8,91E-01 |
| P26443         | 54 | 30 | 697,53  | 14661  | Glud1    | 0  | 0,78 | 4,92E-01 |
| ALBU_BO<br>VIN | 63 | 33 | 913,64  | 280717 | ALB      | 7  | 0,56 | 2,12E-03 |
| Q9QYR6         | 24 | 52 | 320,53  | 17754  | Map1a    | 0  | 1,24 | 6,48E-01 |
| P23819         | 37 | 29 | 633,93  |        | Gria2    | 5  | 1,04 | 9,76E-01 |
| P47857         | 44 | 24 | 677,38  | 18642  | Pfkm     | 3  | 1,06 | 9,76E-01 |
| O35526         | 48 | 21 | 859,23  | 20907  | Stx1a    | 1  | 1,03 | 9,83E-01 |
| P18872         | 52 | 16 | 1511,41 | 14681  | Gnao1    | 2  | 0,97 | 9,76E-01 |
| Q8QZT1         | 54 | 23 | 805,99  | 110446 | Acat1    | 0  | 0,83 | 6,98E-01 |
| Q6IFX2         | 36 | 6  | 1947,7  | 68239  | Krt42    | 1  | 0,99 | 9,87E-01 |
| Q9CZW5         | 48 | 29 | 673,1   | 28185  | Tomm70   | 0  | 0,65 | 5,06E-02 |
| P50446         | 38 | 3  | 1814,27 | 16687  | Krt6a    | 21 | 0,92 | 9,23E-01 |
| P17183         | 55 | 19 | 683,06  | 13807  | Eno2     | 0  | 0,75 | 3,18E-01 |
| D3Z7P3         | 45 | 26 | 532,29  | 14660  | Gls      | 0  | 0,91 | 9,02E-01 |
| P60469         | 39 | 43 | 425,79  | 76787  | Ppfia3   | 3  | 1,08 | 9,56E-01 |
| Q01853         | 51 | 35 | 531,46  | 269523 | Vcp      | 0  | 1,13 | 8,86E-01 |
| Q9QWL7         | 51 | 10 | 2258,36 | 16667  | Krt17    | 27 | 1,18 | 7,74E-01 |
| P28663         | 68 | 18 | 632,17  | 17957  | Napb     | 5  | 1,04 | 9,78E-01 |
| Q6ZQ38         | 34 | 41 | 611,6   | 71902  | Cand1    | 2  | 1,03 | 9,82E-01 |
| Q60597         | 40 | 39 | 526,18  | 18293  | Ogdh     | 0  | 0,80 | 5,86E-01 |
| Q91V14         | 24 | 25 | 819,22  | 57138  | Slc12a5  | 5  | 0,98 | 9,85E-01 |
| Q9QWI6         | 41 | 45 | 418,52  | 56013  | Srcin1   | 0  | 1,12 | 8,94E-01 |
| Q9JI91         | 49 | 27 | 525,03  | 11472  | Actn2    | 0  | 1,20 | 7,33E-01 |
| Q91V92         | 44 | 43 | 539,17  | 104112 | Acly     | 0  | 1,04 | 9,78E-01 |
| Q9DBJ1         | 57 | 11 | 748,51  | 18648  | Pgam1    | 7  | 1,11 | 9,17E-01 |
| O55131         | 47 | 24 | 747,42  | 235072 | Septin7  | 1  | 1,10 | 9,34E-01 |
| P20029         | 50 | 32 | 740,25  | 14828  | Hspa5    | 0  | 0,97 | 9,77E-01 |
| P56564         | 22 | 11 | 514,62  | 20512  | Slc1a3   | 2  | 0,87 | 8,12E-01 |
| P06745         | 45 | 27 | 896,42  | 14751  | Gpi      | 0  | 1,10 | 9,34E-01 |
| Q9Z2H5         | 44 | 30 | 469,07  | 13821  | Epb4111  | 0  | 1,29 | 5,04E-01 |
| Q810U3         | 31 | 37 | 637,85  | 269116 | Nfasc    | 0  | 1,24 | 6,42E-01 |
| Q5SQX6         | 34 | 23 | 607,36  | 76884  | Cyfip2   | 22 | 1,00 | 9,99E-01 |
| Q9DB77         | 47 | 20 | 881,71  | 67003  | Uqcrc2   | 0  | 0,74 | 3,11E-01 |
| P63101         | 79 | 18 | 1055    | 22631  | Ywhaz    | 6  | 0,94 | 9,64E-01 |
| Q8K2B3         | 48 | 28 | 587,19  | 66945  | Sdha     | 0  | 0,79 | 4,99E-01 |

|                 |    |    |         |        |          |   |      |          |
|-----------------|----|----|---------|--------|----------|---|------|----------|
| Q91XV3          | 85 | 16 | 546,47  | 70350  | Basp1    | 0 | 0,84 | 7,09E-01 |
| P05063          | 60 | 20 | 600,25  | 11676  | Aldoc    | 0 | 0,88 | 8,41E-01 |
| Q922S4          | 38 | 33 | 653,47  | 207728 | Pde2a    | 0 | 0,86 | 7,86E-01 |
| Q7TQF7          | 46 | 27 | 696,32  | 218038 | Amph     | 2 | 1,18 | 7,79E-01 |
| P09411          | 74 | 21 | 636,16  | 18655  | Pgk1     | 7 | 1,11 | 9,16E-01 |
| Q3UHHJ0         | 46 | 28 | 377,48  | 269774 | Aak1     | 0 | 1,09 | 9,42E-01 |
| Q9JME5          | 39 | 40 | 410,01  | 11775  | Ap3b2    | 0 | 1,09 | 9,39E-01 |
| Q9WUA3          | 37 | 28 | 452,23  | 56421  | Pfkip    | 5 | 1,17 | 8,07E-01 |
| Q9R1T4          | 41 | 9  | 719,13  | 56526  | Septin6  | 0 | 1,09 | 9,39E-01 |
| ALDOA_R<br>ABIT | 47 | 19 | 828,18  |        |          | 0 | 1,23 | 6,66E-01 |
| Q8BKX1          | 65 | 30 | 628,91  | 108100 | Baiap2   | 0 | 1,13 | 8,85E-01 |
| Q8CI94          | 45 | 30 | 531,98  | 110078 | Pygb     | 8 | 0,92 | 9,34E-01 |
| Q02248          | 43 | 21 | 522,33  | 12387  | Ctnnb1   | 0 | 1,17 | 7,91E-01 |
| P12382          | 35 | 21 | 423,29  | 18641  | Pfkl     | 0 | 1,01 | 1,00E+00 |
| Q9Z1B3          | 34 | 39 | 415,85  | 18795  | Plcb1    | 0 | 1,00 | 1,00E+00 |
| Q61301          | 44 | 29 | 362,41  | 12386  | Ctnna2   | 4 | 0,91 | 9,02E-01 |
| P08249          | 69 | 21 | 1072,3  | 17448  | Mdh2     | 0 | 0,79 | 5,33E-01 |
| D3YVF0          | 50 | 23 | 731,38  | 238276 | Akap5    | 0 | 0,78 | 4,66E-01 |
| Q9ES97          | 41 | 29 | 542,49  | 20168  | Rtn3     | 1 | 1,03 | 9,83E-01 |
| P14094          | 38 | 18 | 911,79  | 11931  | Atp1b1   | 0 | 0,98 | 9,83E-01 |
| Q8BH59          | 39 | 26 | 1132,69 | 78830  | Slc25a12 | 6 | 0,78 | 4,69E-01 |
| F6SEU4          | 33 | 35 | 438,55  | 240057 | Syngap1  | 1 | 1,09 | 9,51E-01 |
| P68134          | 50 | 5  | 2049,61 | 11459  | Acta1    | 0 | 0,57 | 3,07E-03 |
| Q9QXZ0          | 10 | 65 | 105,97  |        | Macf1    | 1 | 1,21 | 7,50E-01 |
| P31324          | 57 | 17 | 512,32  | 19088  | Prkar2b  | 4 | 0,92 | 9,30E-01 |
| P47708          | 46 | 27 | 422,2   | 19894  | Rph3a    | 0 | 1,23 | 6,58E-01 |
| Q8BFR5          | 54 | 21 | 570,41  | 233870 | Tufm     | 0 | 0,92 | 9,31E-01 |
| Q9Z2Y3          | 76 | 27 | 703,02  | 26556  | Homer1   | 1 | 0,94 | 9,59E-01 |
| P68033          | 45 | 4  | 2037,32 | 11464  | Actc1    | 0 | 0,45 | 3,99E-06 |
| P17156          | 40 | 10 | 995,63  | 15512  | Hspa2    | 2 | 1,12 | 9,15E-01 |
| P16330          | 53 | 30 | 832,02  | 12799  | Cnp      | 0 | 0,89 | 8,54E-01 |
| E9Q3L2          | 23 | 50 | 337,62  | 224020 | Pi4ka    | 0 | 0,88 | 8,41E-01 |
| P70704          | 33 | 37 | 491,24  | 11980  | Atp8a1   | 0 | 0,94 | 9,56E-01 |
| P43006          | 34 | 19 | 1106,81 | 20511  | Slc1a2   | 0 | 0,91 | 9,16E-01 |
| Q60864          | 57 | 39 | 396,04  | 20867  | Stip1    | 0 | 0,93 | 9,48E-01 |
| P15508          | 29 | 47 | 208,99  |        | Sptb     | 0 | 1,39 | 2,63E-01 |
| Q8K0T0          | 44 | 20 | 628,57  | 104001 | Rtn1     | 0 | 1,09 | 9,47E-01 |
| P46660          | 58 | 29 | 621,57  | 226180 | Ina      | 0 | 1,22 | 6,94E-01 |
| P40142          | 39 | 29 | 554,04  | 21881  | Tkt      | 0 | 0,99 | 9,95E-01 |
| P28660          | 34 | 36 | 479,02  | 50884  | Nckap1   | 1 | 0,94 | 9,63E-01 |
| P48722          | 42 | 30 | 415,57  | 18415  | Hspa4l   | 0 | 1,17 | 7,98E-01 |
| Q99P72          | 37 | 34 | 482,17  | 68585  | Rtn4     | 0 | 1,16 | 8,09E-01 |
| P11798          | 44 | 19 | 1004,59 | 12322  | Camk2a   | 9 | 1,10 | 9,23E-01 |
| Q80TE7          | 36 | 40 | 407,17  | 242274 | Lrrc7    | 3 | 0,86 | 7,89E-01 |
| Q8CA95          | 38 | 32 | 567,47  | 23984  | Pde10a   | 0 | 0,88 | 8,53E-01 |
| Q62188          | 46 | 17 | 635,22  | 22240  | Dpysl3   | 1 | 1,15 | 8,35E-01 |

|             |    |    |          |        |          |    |      |          |
|-------------|----|----|----------|--------|----------|----|------|----------|
| P62737      | 42 | 4  | 1789,42  | 11475  | Acta2    | 0  | 0,45 | 3,99E-06 |
| Q9Z0P4      | 58 | 20 | 507,58   | 18483  | Palm     | 2  | 0,87 | 8,25E-01 |
| Q9Z1G3      | 65 | 31 | 608,28   | 66335  | Atp6v1c1 | 0  | 1,16 | 8,26E-01 |
| Q8C1B7      | 48 | 13 | 719,3    | 52398  | Septin11 | 18 | 1,10 | 9,34E-01 |
| Q9JIS5      | 25 | 18 | 793,47   | 64051  | Sv2a     | 0  | 1,01 | 1,00E+00 |
| Q9Z2Q6      | 43 | 18 | 546,08   | 18951  | Septin5  | 1  | 1,13 | 8,82E-01 |
| P70398      | 21 | 50 | 176,02   | 22284  | Usp9x    | 0  | 1,06 | 9,74E-01 |
| Q61699      | 47 | 30 | 370,07   | 15505  | Hsph1    | 0  | 1,11 | 9,16E-01 |
| P84091      | 58 | 25 | 641,11   | 11773  | Ap2m1    | 0  | 1,25 | 6,23E-01 |
| O08788      | 33 | 35 | 249,26   | 13191  | Dctn1    | 0  | 1,32 | 4,56E-01 |
| Q8K596      | 29 | 21 | 626,13   | 110891 | Slc8a2   | 1  | 0,96 | 9,74E-01 |
| P40124      | 57 | 21 | 446,56   | 12331  | Cap1     | 1  | 0,88 | 8,51E-01 |
| Q6P9K9      | 23 | 25 | 356,9    | 18191  | Nrxn3    | 6  | 1,18 | 7,89E-01 |
| O08917      | 57 | 21 | 383,56   | 14251  | Flot1    | 0  | 1,00 | 1,00E+00 |
| P11881      | 19 | 53 | 204,63   | 16438  | Itpr1    | 0  | 1,07 | 9,70E-01 |
| P05201      | 64 | 25 | 763,62   | 14718  | Got1     | 0  | 1,04 | 9,77E-01 |
| P63268      | 39 | 3  | 1786,67  | 11468  | Actg2    | 0  | 0,45 | 3,99E-06 |
| Q05920      | 32 | 32 | 394,15   |        | Pc       | 0  | 0,73 | 2,61E-01 |
| Q60932      | 59 | 15 | 756,81   | 22333  | Vdac1    | 2  | 0,84 | 7,33E-01 |
| P08553      | 36 | 30 | 525,54   | 18040  | Nefm     | 4  | 1,14 | 8,66E-01 |
| Q9Z2K1      | 24 | 8  | 2452,76  | 16666  | Krt16    | 0  | 0,86 | 7,90E-01 |
| Q9CZ13      | 44 | 18 | 646,85   | 22273  | Uqerc1   | 1  | 0,83 | 6,74E-01 |
| O08532      | 26 | 27 | 334,25   | 12293  | Cacna2d1 | 1  | 0,86 | 7,89E-01 |
| P05202      | 47 | 23 | 805,54   | 14719  | Got2     | 0  | 0,99 | 9,85E-01 |
| P56399      | 34 | 25 | 488,45   | 22225  | Usp5     | 0  | 1,09 | 9,42E-01 |
| Q61548      | 24 | 20 | 733,3    | 20616  | Snap91   | 3  | 1,10 | 9,34E-01 |
| Q8VD37      | 47 | 28 | 330,25   | 73094  | Sgip1    | 0  | 1,18 | 7,77E-01 |
| Q91V41      | 78 | 16 | 571,04   | 68365  | Rab14    | 2  | 1,11 | 9,16E-01 |
| P08113      | 38 | 30 | 359,39   | 22027  | Hsp90b1  | 0  | 0,83 | 6,94E-01 |
| P35564      | 39 | 24 | 405,44   | 12330  | Canx     | 0  | 0,81 | 6,23E-01 |
| Q11011      | 35 | 31 | 482,15   | 19155  | Npepps   | 0  | 1,08 | 9,60E-01 |
| B1AWN6      | 19 | 21 | 216,93   | 110876 | Scn2a    | 20 | 1,09 | 9,36E-01 |
| TRYP_PIG    | 50 | 9  | 10937,77 |        |          | 0  | 1,07 | 9,71E-01 |
| P35486      | 54 | 29 | 531,05   | 18597  | Pdha1    | 1  | 0,86 | 7,90E-01 |
| P50518      | 51 | 19 | 660,91   | 11973  | Atp6v1e1 | 0  | 1,17 | 8,07E-01 |
| O35927      | 31 | 29 | 358,55   | 18163  | Ctnnd2   | 5  | 1,04 | 9,76E-01 |
| Q99KJ8      | 53 | 17 | 352,5    | 69654  | Dctn2    | 0  | 1,09 | 9,44E-01 |
| KRHB6_HUMAN | 53 | 7  | 295,74   | 3892   | KRT86    | 8  | 2,20 | 9,01E-06 |
| DHE3_BOVIN  | 36 | 22 | 528,11   | 281785 | GLUD1    | 0  | 0,81 | 5,97E-01 |
| Q8BVE3      | 48 | 22 | 396,68   | 108664 | Atp6v1h  | 0  | 1,09 | 9,39E-01 |
| Q80TZ3      | 29 | 26 | 424,74   | 72685  | Dnajc6   | 3  | 1,32 | 4,06E-01 |
| Q8VEM8      | 39 | 16 | 1019,25  | 18674  | Slc25a3  | 0  | 0,85 | 7,41E-01 |
| Q8BMF4      | 29 | 17 | 538,19   | 235339 | Dlat     | 0  | 0,73 | 2,39E-01 |
| O88533      | 31 | 14 | 347,65   | 13195  | Ddc      | 0  | 4,01 | 1,60E-16 |
| Q61598      | 59 | 15 | 354,8    | 14569  | Gdi2     | 0  | 0,89 | 8,54E-01 |
| Q9D051      | 42 | 14 | 503,14   | 68263  | Pdhb     | 0  | 0,87 | 8,09E-01 |



|                 |    |    |        |        |         |    |      |          |
|-----------------|----|----|--------|--------|---------|----|------|----------|
| Q64487          | 20 | 20 | 324,15 | 19266  | Ptprd   | 10 | 1,03 | 9,85E-01 |
| Q91WD5          | 37 | 16 | 480,05 | 226646 | Ndufs2  | 0  | 0,81 | 6,06E-01 |
| P16125          | 43 | 16 | 669,58 | 16832  | Ldhb    | 0  | 1,03 | 9,83E-01 |
| Q8K1M6          | 46 | 30 | 354,23 | 74006  | Dnm11   | 0  | 1,23 | 6,61E-01 |
| Q8BW75          | 44 | 18 | 400,14 | 109731 | Maob    | 3  | 0,93 | 9,40E-01 |
| P20357          | 25 | 37 | 178,12 | 17756  | Map2    | 0  | 1,08 | 9,70E-01 |
| Q8BFZ3          | 39 | 4  | 875,69 | 238880 | Actbl2  | 0  | 0,71 | 5,00E-01 |
| Q8BZ98          | 30 | 14 | 561,75 | 103967 | Dnm3    | 6  | 1,10 | 9,36E-01 |
| P14824          | 51 | 33 | 286,14 | 11749  | Anxa6   | 0  | 1,05 | 9,76E-01 |
| Q9CQV8          | 59 | 8  | 696,38 | 54401  | Ywhab   | 0  | 0,90 | 8,86E-01 |
| P97427          | 35 | 12 | 627,85 | 12933  | Crmp1   | 2  | 1,16 | 8,25E-01 |
| P48962          | 57 | 13 | 987,34 | 11739  | Slc25a4 | 11 | 0,80 | 5,72E-01 |
| Q8K0U4          | 43 | 30 | 391,99 | 73442  | Hspa12a | 0  | 0,92 | 9,33E-01 |
| P97797          | 35 | 13 | 371,19 | 19261  | Sirpa   | 0  | 0,90 | 8,93E-01 |
| P17751          | 66 | 17 | 757,85 | 21991  | Tpi1    | 0  | 1,10 | 9,34E-01 |
| Q9Z218          | 32 | 26 | 417,5  | 13483  | Dpp6    | 3  | 1,08 | 9,60E-01 |
| P63318          | 44 | 24 | 372,36 | 18752  | Prkcg   | 4  | 0,81 | 6,35E-01 |
| O70161          | 36 | 19 | 208,88 | 18717  | Pip5k1c | 0  | 1,09 | 9,60E-01 |
| E9PUL5          | 53 | 11 | 345,54 | 69017  | Prrt2   | 0  | 0,87 | 8,10E-01 |
| Q6PB66          | 25 | 34 | 183,07 | 72416  | Lrpprc  | 0  | 0,79 | 5,35E-01 |
| B0V2N1          | 20 | 21 | 289,01 | 19280  | Ptprs   | 0  | 1,11 | 9,34E-01 |
| Q3UHL1          | 49 | 21 | 347,99 | 235604 | Camkv   | 0  | 1,18 | 7,86E-01 |
| P07356          | 47 | 20 | 520,58 | 12306  | Anxa2   | 0  | 0,94 | 9,60E-01 |
| P15105          | 48 | 19 | 515,74 | 14645  | Glul    | 0  | 0,87 | 8,07E-01 |
| P47757          | 54 | 17 | 344,96 | 12345  | Capzb   | 0  | 1,02 | 9,91E-01 |
| P27773          | 43 | 23 | 452,98 | 14827  | Pdia3   | 0  | 0,90 | 8,95E-01 |
| Q9Z210          | 34 | 25 | 356,68 | 56384  | Letm1   | 0  | 0,75 | 3,18E-01 |
| O08539          | 39 | 20 | 507,16 | 30948  | Bin1    | 0  | 1,03 | 9,85E-01 |
| O70589          | 31 | 28 | 294,42 | 12361  | Cask    | 0  | 1,12 | 8,91E-01 |
| Q9QXS6          | 35 | 23 | 309,32 | 56320  | Dbn1    | 0  | 1,02 | 9,96E-01 |
| Q7TMB8          | 22 | 8  | 397,1  | 20430  | Cyfp1   | 0  | 0,77 | 3,85E-01 |
| Q9DB05          | 61 | 12 | 352,88 | 108124 | Napa    | 0  | 1,03 | 9,93E-01 |
| P06151          | 44 | 17 | 531,85 | 16828  | Ldha    | 1  | 0,92 | 9,34E-01 |
| Q9EQH3          | 32 | 25 | 367,3  | 65114  | Vps35   | 0  | 1,09 | 9,50E-01 |
| Q8CHH9          | 38 | 17 | 424,64 | 20362  | Septin8 | 0  | 0,98 | 9,81E-01 |
| KRHB5_H<br>UMAN | 51 | 6  | 250,66 | 3891   | KRT85   | 27 | 2,27 | 3,20E-06 |
| Q9DCX2          | 54 | 12 | 461,55 | 71679  | Atp5pd  | 0  | 0,79 | 5,01E-01 |
| P63044          | 69 | 6  | 464    | 22318  | Vamp2   | 2  | 1,42 | 1,91E-01 |
| Q9R0P9          | 63 | 13 | 538,74 | 22223  | Uchl1   | 0  | 1,28 | 5,43E-01 |
| Q60634          | 54 | 23 | 269,56 | 14252  | Flot2   | 0  | 0,99 | 9,89E-01 |
| Q9WU78          | 39 | 29 | 215,65 | 18571  | Pdcd6ip | 0  | 1,08 | 9,56E-01 |
| P08551          | 37 | 24 | 367,01 | 18039  | Nefl    | 0  | 1,06 | 9,74E-01 |
| P68254          | 47 | 11 | 607,63 | 22630  | Ywhaq   | 0  | 0,88 | 8,26E-01 |
| Q6PH08          | 35 | 28 | 266,74 | 238988 | Erc2    | 5  | 1,35 | 3,45E-01 |
| KRHB3_H<br>UMAN | 42 | 2  | 277,23 |        |         | 0  | 0,51 | 1,51E-02 |
| P70175          | 31 | 23 | 221,57 | 53310  | Dlg3    | 0  | 1,06 | 9,76E-01 |

|            |    |    |         |        |          |   |      |          |
|------------|----|----|---------|--------|----------|---|------|----------|
| P68404     | 36 | 15 | 363,09  | 18751  | Prkcb    | 4 | 1,08 | 9,56E-01 |
| P10637     | 32 | 22 | 437,39  | 17762  | Mapt     | 0 | 0,98 | 9,85E-01 |
| Q9CS84     | 22 | 24 | 257,11  | 18189  | Nrxn1    | 3 | 1,00 | 9,99E-01 |
| P51881     | 53 | 11 | 846,87  | 11740  | Slc25a5  | 0 | 0,72 | 2,06E-01 |
| Q91V61     | 60 | 16 | 520,12  | 94280  | Sfxn3    | 2 | 0,78 | 4,72E-01 |
| Q99N28     | 42 | 12 | 385,96  | 94332  | Cadm3    | 0 | 0,97 | 9,76E-01 |
| P62874     | 33 | 7  | 756,38  | 14688  | Gnb1     | 6 | 0,77 | 4,48E-01 |
| P61922     | 34 | 16 | 486,71  | 268860 | Abat     | 0 | 0,70 | 1,64E-01 |
| Q61490     | 31 | 20 | 345,97  | 11658  | Alcam    | 0 | 1,06 | 9,74E-01 |
| Q91ZX7     | 9  | 36 | 112,42  | 16971  | Lrp1     | 2 | 0,89 | 8,57E-01 |
| Q8R0Y6     | 35 | 27 | 210,87  | 107747 | Aldh1l1  | 0 | 0,85 | 7,48E-01 |
| O08749     | 39 | 18 | 618,89  | 13382  | Dld      | 0 | 0,88 | 8,33E-01 |
| P60904     | 46 | 10 | 396,22  | 13002  | Dnaje5   | 0 | 1,27 | 5,48E-01 |
| P61982     | 58 | 8  | 668,79  | 22628  | Ywhag    | 5 | 1,04 | 9,76E-01 |
| P63328     | 31 | 11 | 671,42  | 19055  | Ppp3ca   | 6 | 0,95 | 9,70E-01 |
| Q811D0     | 26 | 14 | 310,56  | 13383  | Dlg1     | 0 | 1,18 | 7,77E-01 |
| Q91ZA3     | 36 | 25 | 239,51  | 110821 | Pcca     | 0 | 0,64 | 4,82E-02 |
| P58252     | 31 | 26 | 274,73  | 13629  | Eef2     | 0 | 1,01 | 1,00E+00 |
| Q6ZQ18     | 26 | 19 | 233,58  | 668212 | Efr3b    | 1 | 0,92 | 9,24E-01 |
| O35136     | 31 | 23 | 257,97  | 17968  | Ncam2    | 0 | 1,08 | 9,59E-01 |
| O88342     | 37 | 19 | 343,51  | 22388  | Wdr1     | 0 | 1,01 | 1,00E+00 |
| P42932     | 45 | 22 | 393,78  | 12469  | Cct8     | 0 | 1,04 | 9,77E-01 |
| ALBU_HUMAN | 41 | 20 | 505,78  | 213    | ALB      | 0 | 0,80 | 5,96E-01 |
| Q8CGY8     | 28 | 28 | 229,93  | 108155 | Ogt      | 0 | 1,08 | 9,56E-01 |
| O35098     | 35 | 13 | 216,66  |        | Dpysl4   | 0 | 1,31 | 4,42E-01 |
| Q91WC3     | 41 | 27 | 239,22  | 216739 | Acsl6    | 1 | 0,88 | 8,56E-01 |
| Q9D0M3     | 34 | 10 | 468,71  | 66445  | Cycl     | 0 | 0,86 | 7,90E-01 |
| P08752     | 49 | 8  | 622,09  | 14678  | Gnai2    | 0 | 0,90 | 8,91E-01 |
| P35700     | 68 | 11 | 432,11  | 18477  | Prdx1    | 9 | 1,33 | 3,97E-01 |
| Q80TL4     | 51 | 19 | 285,75  | 230085 | Phf24    | 0 | 1,09 | 9,38E-01 |
| P80318     | 45 | 24 | 212,87  | 12462  | Cct3     | 0 | 1,19 | 7,60E-01 |
| P35802     | 20 | 9  | 467,92  | 234267 | Gpm6a    | 0 | 0,89 | 8,85E-01 |
| Q9D0K2     | 31 | 15 | 287,22  | 67041  | Oxct1    | 0 | 0,86 | 7,78E-01 |
| AGG56535.I | 42 | 12 | 368,16  |        |          | 0 | 5,12 | 1,60E-16 |
| Q99PU5     | 33 | 19 | 232,58  | 94180  | Acsbg1   | 0 | 0,94 | 9,56E-01 |
| P97807     | 40 | 15 | 351,81  | 14194  | Fh       | 0 | 0,82 | 6,57E-01 |
| Q99PT1     | 54 | 9  | 306,55  | 192662 | Arhgdia  | 0 | 0,92 | 9,22E-01 |
| Q9Z1S5     | 44 | 16 | 417,01  | 24050  | Septin3  | 0 | 0,92 | 9,34E-01 |
| P24529     | 41 | 19 | 256,87  | 21823  | Th       | 0 | 4,52 | 1,60E-16 |
| Q8R1Q8     | 48 | 23 | 250,14  | 235661 | Dync1li1 | 1 | 1,06 | 9,74E-01 |
| Q8BGZ7     | 29 | 5  | 1120,73 | 109052 | Krt75    | 1 | 1,08 | 9,69E-01 |
| Q9EPN1     | 15 | 34 | 104,37  | 26422  | Nbea     | 0 | 1,04 | 9,82E-01 |
| P10852     | 30 | 16 | 600,45  | 17254  | Slc3a2   | 0 | 1,05 | 9,76E-01 |
| P63011     | 51 | 6  | 909,09  | 19339  | Rab3a    | 1 | 1,09 | 9,48E-01 |
| P23818     | 31 | 23 | 305,7   | 14799  | Grial    | 2 | 1,11 | 9,22E-01 |
| P70441     | 53 | 17 | 218,16  | 26941  | Slc9a3r1 | 0 | 1,05 | 9,76E-01 |

|             |    |    |         |        |          |    |      |          |
|-------------|----|----|---------|--------|----------|----|------|----------|
| B2RSH2      | 44 | 9  | 629,06  | 14677  | Gnai1    | 6  | 0,81 | 6,36E-01 |
| P70168      | 27 | 19 | 220,2   | 16211  | Kpnb1    | 0  | 1,06 | 9,74E-01 |
| Q8K212      | 37 | 30 | 225,15  | 107975 | Pacs1    | 0  | 1,18 | 7,97E-01 |
| Q03137      | 24 | 17 | 212,74  | 13838  | Epha4    | 2  | 1,14 | 8,85E-01 |
| P84309      | 20 | 21 | 216,43  | 224129 | Adcy5    | 1  | 0,73 | 2,47E-01 |
| KRHB4_HUMAN | 48 | 23 | 417,99  |        |          | 1  | 1,11 | 9,19E-01 |
| Q8JZQ2      | 29 | 25 | 230,23  | 69597  | Afg3l2   | 0  | 0,76 | 4,02E-01 |
| O70318      | 32 | 25 | 176,97  | 13822  | Epb41l2  | 0  | 0,87 | 8,09E-01 |
| P63085      | 47 | 11 | 389,32  | 26413  | Mapk1    | 8  | 1,16 | 8,10E-01 |
| Q8K021      | 41 | 10 | 345,45  | 107767 | Scamp1   | 0  | 1,22 | 6,94E-01 |
| Q9Z219      | 48 | 23 | 317,15  | 20916  | Sucla2   | 0  | 0,89 | 8,53E-01 |
| Q4KUS2      | 19 | 35 | 140,61  | 382018 | Unc13a   | 0  | 1,10 | 9,24E-01 |
| Q8BJI1      | 24 | 15 | 290,3   | 229706 | Slc6a17  | 0  | 0,94 | 9,60E-01 |
| P09103      | 35 | 18 | 202,09  | 18453  | P4hb     | 0  | 0,93 | 9,36E-01 |
| Q8BLQ9      | 41 | 16 | 281,82  | 239857 | Cadm2    | 0  | 1,28 | 5,42E-01 |
| Q9Z2W9      | 28 | 18 | 259,48  | 53623  | Gria3    | 2  | 0,99 | 9,87E-01 |
| P97300      | 34 | 16 | 462,22  | 20320  | Nptn     | 0  | 1,09 | 9,48E-01 |
| TAU_HUMAN   | 20 | 16 | 417,45  |        |          | 0  | 0,98 | 9,78E-01 |
| P02535      | 22 | 3  | 3020,19 | 16661  | Krt10    | 0  | 3,77 | 4,06E-05 |
| Q923T9      | 28 | 6  | 467,57  | 12325  | Camk2g   | 0  | 1,00 | 9,91E-01 |
| P80314      | 38 | 19 | 245,98  | 12461  | Cct2     | 0  | 1,21 | 7,25E-01 |
| P68181      | 40 | 7  | 350,82  | 18749  | Prkacb   | 13 | 1,03 | 9,87E-01 |
| P53810      | 65 | 17 | 174,71  | 18738  | Pitpna   | 3  | 1,11 | 9,19E-01 |
| O54983      | 34 | 11 | 483,93  | 12971  | Crym     | 0  | 0,87 | 8,05E-01 |
| P68510      | 58 | 12 | 629,08  | 22629  | Ywhah    | 3  | 0,90 | 8,89E-01 |
| Q6NXX7      | 29 | 21 | 349,87  | 269109 | Dpp10    | 0  | 0,89 | 8,57E-01 |
| P14152      | 43 | 14 | 615,45  | 17449  | Mdh1     | 0  | 1,05 | 9,76E-01 |
| P80315      | 45 | 21 | 213,98  | 12464  | Cct4     | 1  | 1,01 | 1,00E+00 |
| P47754      | 67 | 11 | 276,73  | 12343  | Capza2   | 2  | 1,04 | 9,76E-01 |
| Q91YT0      | 36 | 18 | 380,74  | 17995  | Ndufv1   | 0  | 0,80 | 5,47E-01 |
| Q8BYR5      | 21 | 17 | 167,27  | 320405 | Cadps2   | 0  | 1,62 | 2,37E-02 |
| Q8BG39      | 24 | 14 | 418,51  | 64176  | Sv2b     | 2  | 0,96 | 9,76E-01 |
| O55106      | 32 | 16 | 197,83  | 268980 | Strn     | 2  | 0,78 | 4,82E-01 |
| P17742      | 63 | 11 | 336     | 268373 | Ppia     | 0  | 0,87 | 8,26E-01 |
| P48453      | 31 | 9  | 409,29  | 19056  | Ppp3cb   | 0  | 0,95 | 9,70E-01 |
| CATA_HUMAN  | 33 | 16 | 293,24  |        |          | 4  | 0,93 | 9,39E-01 |
| P62761      | 70 | 14 | 208,53  | 26950  | Vsnl1    | 3  | 1,20 | 7,33E-01 |
| Q80U63      | 28 | 20 | 193,54  | 170731 | Mfn2     | 0  | 0,88 | 8,43E-01 |
| P62880      | 32 | 3  | 685,85  | 14693  | Gnb2     | 3  | 0,76 | 3,75E-01 |
| Q9D6R2      | 43 | 17 | 566,42  | 67834  | Idh3a    | 0  | 0,85 | 7,46E-01 |
| P63005      | 46 | 18 | 257,37  | 18472  | Pafah1b1 | 1  | 1,02 | 9,98E-01 |
| Q9CWZ7      | 62 | 19 | 332,19  | 108123 | Napg     | 0  | 1,07 | 9,71E-01 |
| PPIA_HUMAN  | 57 | 10 | 312,06  |        |          | 0  | 0,88 | 8,50E-01 |
| O35945      | 28 | 4  | 243,14  | 26358  | Aldh1a7  | 0  | 4,30 | 6,26E-06 |

|            |    |    |        |        |          |    |      |          |
|------------|----|----|--------|--------|----------|----|------|----------|
| Q8BX70     | 11 | 35 | 46,46  | 320528 | Vps13c   | 0  | 0,96 | 9,74E-01 |
| P53994     | 69 | 8  | 299,03 | 59021  | Rab2a    | 8  | 1,10 | 9,25E-01 |
| Q921M7     | 42 | 9  | 211,56 | 223601 | Cyrib    | 4  | 1,07 | 9,72E-01 |
| O55042     | 57 | 6  | 426,58 | 20617  | Snca     | 4  | 0,91 | 9,09E-01 |
| P05132     | 32 | 6  | 340,62 | 18747  | Prkaca   | 0  | 0,97 | 9,76E-01 |
| A2AN08     | 8  | 40 | 50,97  | 69116  | Ubr4     | 0  | 1,22 | 6,92E-01 |
| P42859     | 12 | 33 | 79,6   |        | Htt      | 0  | 1,19 | 7,60E-01 |
| P11627     | 19 | 21 | 186,89 |        | Llcam    | 0  | 0,94 | 9,64E-01 |
| Q9R111     | 44 | 22 | 309,64 | 14544  | Gda      | 0  | 0,81 | 6,07E-01 |
| P19783     | 60 | 15 | 432,3  | 12857  | Cox4i1   | 0  | 0,81 | 6,28E-01 |
| Q9QYC0     | 28 | 17 | 227,31 | 11518  | Add1     | 1  | 1,17 | 8,05E-01 |
| P47738     | 34 | 15 | 242,75 | 11669  | Aldh2    | 0  | 0,75 | 3,15E-01 |
| E9Q401     | 8  | 31 | 51,6   | 20191  | Ryr2     | 5  | 1,01 | 1,00E+00 |
| Q8VHW2     | 42 | 10 | 180,6  |        | Cacng8   | 0  | 0,99 | 9,91E-01 |
| O08709     | 64 | 15 | 265,89 | 11758  | Prdx6    | 0  | 0,82 | 6,58E-01 |
| Q3UV17     | 19 | 7  | 871,98 | 77055  | Krt76    | 2  | 1,29 | 4,83E-01 |
| P61161     | 31 | 12 | 312,46 | 66713  | Actr2    | 0  | 0,96 | 9,74E-01 |
| Q60902     | 28 | 21 | 124,31 | 13859  | Eps15l1  | 0  | 0,90 | 8,81E-01 |
| Q9CZS1     | 36 | 16 | 209,41 | 72535  | Aldh1b1  | 1  | 0,66 | 7,46E-02 |
| O70443     | 52 | 16 | 283,76 | 14687  | Gnaz     | 0  | 0,97 | 9,76E-01 |
| Q8BWF0     | 35 | 17 | 302,99 | 214579 | Aldh5a1  | 0  | 0,97 | 9,76E-01 |
| Q3UNH4     | 30 | 23 | 171,81 | 26913  | Gprin1   | 0  | 0,88 | 8,26E-01 |
| Q6PHZ2     | 31 | 8  | 401,24 | 108058 | Camk2d   | 0  | 1,29 | 5,02E-01 |
| Q9CQQ7     | 38 | 16 | 353,34 | 11950  | Atp5pb   | 0  | 0,82 | 6,58E-01 |
| Q80UG2     | 18 | 20 | 100,5  | 243743 | Plxna4   | 11 | 0,93 | 9,56E-01 |
| Q9WV34     | 45 | 21 | 285,18 | 50997  | Mpp2     | 2  | 0,99 | 9,91E-01 |
| K1H1_HUMAN | 56 | 4  | 580,53 |        |          | 1  | 1,00 | 9,91E-01 |
| P28738     | 28 | 14 | 146,44 | 16574  | Kif5c    | 8  | 1,24 | 6,21E-01 |
| P21279     | 49 | 12 | 288,8  | 14682  | Gnaq     | 7  | 0,89 | 8,53E-01 |
| K1HB_HUMAN | 54 | 5  | 549,56 | 3884   | KRT33B   | 17 | 1,87 | 9,82E-04 |
| P26645     | 55 | 10 | 191,05 | 17118  | Marcks   | 0  | 0,93 | 9,42E-01 |
| Q9CYT6     | 41 | 18 | 309,94 | 67252  | Cap2     | 0  | 0,88 | 8,32E-01 |
| Q6ZPE2     | 20 | 31 | 99,06  | 77980  | Sbfl     | 0  | 0,99 | 9,94E-01 |
| G5E8K5     | 13 | 14 | 150,72 | 11735  | Ank3     | 0  | 0,80 | 6,23E-01 |
| P31648     | 18 | 8  | 243,08 | 232333 | Slc6a1   | 0  | 1,04 | 9,78E-01 |
| Q3TXX4     | 20 | 11 | 435,36 | 72961  | Slc17a7  | 3  | 0,97 | 9,76E-01 |
| Q9D6M3     | 42 | 9  | 420,88 | 68267  | Slc25a22 | 3  | 0,85 | 7,61E-01 |
| P11983     | 39 | 20 | 283,34 | 21454  | Tcp1     | 0  | 1,12 | 8,93E-01 |
| Q9Z0X1     | 29 | 15 | 199,27 | 26926  | Aifm1    | 0  | 0,76 | 3,03E-01 |
| Q9CZC8     | 38 | 14 | 200,36 | 69938  | Scrn1    | 0  | 1,08 | 9,55E-01 |
| Q9QXL2     | 14 | 18 | 189,94 | 16564  | Kif21a   | 1  | 1,22 | 7,20E-01 |
| K1HA_HUMAN | 58 | 2  | 224,8  |        |          | 6  | 1,19 | 7,71E-01 |
| Q60931     | 40 | 10 | 402,3  | 22335  | Vdac3    | 0  | 0,86 | 7,77E-01 |
| P10126     | 30 | 8  | 435,39 | 13627  | Eef1a1   | 9  | 1,05 | 9,76E-01 |
| Q9Z0E0     | 28 | 19 | 318,13 | 26562  | Ncdn     | 0  | 0,96 | 9,76E-01 |

|        |    |    |        |        |          |    |      |          |
|--------|----|----|--------|--------|----------|----|------|----------|
| Q9CR62 | 55 | 16 | 377,57 | 67863  | Slc25a11 | 0  | 0,94 | 9,56E-01 |
| Q80TR1 | 19 | 19 | 221,84 | 330814 | Adgr11   | 2  | 1,06 | 9,74E-01 |
| P62823 | 48 | 7  | 605,55 | 67295  | Rab3c    | 2  | 1,27 | 5,50E-01 |
| Q64727 | 30 | 29 | 130,67 | 22330  | Vcl      | 0  | 1,05 | 9,76E-01 |
| Q01065 | 36 | 16 | 203,09 | 18574  | Pde1b    | 2  | 0,81 | 6,23E-01 |
| P80316 | 40 | 20 | 180,52 | 12465  | Cct5     | 0  | 1,08 | 9,56E-01 |
| Q91V12 | 30 | 11 | 218,11 | 70025  | Acot7    | 0  | 1,17 | 8,25E-01 |
| P62821 | 68 | 8  | 456,14 | 19324  | Rab1A    | 4  | 1,19 | 7,61E-01 |
| Q60598 | 42 | 21 | 186,64 | 13043  | Ctnn     | 0  | 1,08 | 9,56E-01 |
| Q8BMS1 | 27 | 19 | 222,88 | 97212  | Hadha    | 0  | 1,03 | 9,85E-01 |
| P67778 | 56 | 14 | 278,51 | 18673  | Phb      | 0  | 0,85 | 7,61E-01 |
| Q62465 | 35 | 11 | 258,46 | 26949  | Vat1     | 0  | 1,65 | 1,58E-02 |
| Q8BUV3 | 35 | 19 | 153,71 | 268566 | Gphn     | 0  | 1,16 | 8,45E-01 |
| P10649 | 65 | 16 | 294,11 | 14862  | Gstm1    | 1  | 0,96 | 9,76E-01 |
| O54991 | 18 | 21 | 203,03 | 53321  | Cntnap1  | 0  | 0,96 | 9,74E-01 |
| Q8CC35 | 30 | 17 | 132,01 |        | Synpo    | 0  | 1,02 | 1,00E+00 |
| Q9EQ20 | 33 | 16 | 177,43 | 104776 | Aldh6a1  | 0  | 0,79 | 5,25E-01 |
| Q8JZW4 | 35 | 19 | 229    | 240058 | Cpne5    | 1  | 1,00 | 9,96E-01 |
| Q3UM45 | 54 | 20 | 204,31 | 66385  | Ppp1r7   | 0  | 0,88 | 8,34E-01 |
| Q9QXY6 | 30 | 13 | 265,7  | 57440  | Ehd3     | 8  | 1,04 | 9,78E-01 |
| P46097 | 30 | 4  | 462,78 | 20980  | Syt2     | 0  | 1,07 | 9,74E-01 |
| Q3UVX5 | 21 | 24 | 247,98 | 108071 | Grm5     | 0  | 0,87 | 8,07E-01 |
| Q61696 | 33 | 9  | 326,29 | 193740 | Hspa1a   | 6  | 1,05 | 9,76E-01 |
| P17879 | 33 | 9  | 326,29 | 15511  | Hspa1b   | 0  | 1,05 | 9,76E-01 |
| Q80U28 | 19 | 26 | 129,67 | 228355 | Madd     | 0  | 1,25 | 6,29E-01 |
| P32037 | 17 | 10 | 247,63 | 20527  | Slc2a3   | 0  | 0,94 | 9,64E-01 |
| Q6URW6 | 15 | 21 | 131,56 | 71960  | Myh14    | 0  | 0,84 | 6,72E-01 |
| Q80UG5 | 34 | 21 | 256,38 | 53860  | Septin9  | 0  | 1,00 | 1,00E+00 |
| P14211 | 37 | 12 | 195,36 | 12317  | Calr     | 0  | 0,77 | 4,33E-01 |
| Q8CGK3 | 25 | 22 | 160,37 | 74142  | Lonp1    | 0  | 0,80 | 5,41E-01 |
| Q01097 | 18 | 25 | 169,14 | 14812  | Grin2b   | 0  | 1,04 | 9,78E-01 |
| Q60930 | 39 | 10 | 507,97 | 22334  | Vdac2    | 0  | 0,73 | 2,50E-01 |
| P15116 | 24 | 12 | 170,5  | 12558  | Cdh2     | 2  | 0,98 | 9,83E-01 |
| Q99LC5 | 43 | 11 | 134,38 | 110842 | Etfp     | 0  | 0,85 | 7,50E-01 |
| O89053 | 37 | 20 | 278,49 | 12721  | Coro1a   | 0  | 0,93 | 9,39E-01 |
| O35633 | 25 | 13 | 268,43 | 22348  | Slc32a1  | 0  | 0,86 | 7,82E-01 |
| P28740 | 28 | 21 | 198,79 | 16563  | Kif2a    | 0  | 1,35 | 4,04E-01 |
| Q80SW1 | 28 | 6  | 247,89 | 229709 | Ahcyl1   | 13 | 0,95 | 9,74E-01 |
| P23242 | 32 | 9  | 209,89 | 14609  | Gja1     | 0  | 0,98 | 9,83E-01 |
| Q9CZU6 | 33 | 18 | 429,28 | 12974  | Cs       | 0  | 0,81 | 6,17E-01 |
| Q9CQA3 | 44 | 15 | 285,89 | 67680  | Sdhd     | 0  | 0,84 | 7,38E-01 |
| P14231 | 37 | 10 | 292,24 | 11932  | Atp1b2   | 0  | 0,96 | 9,74E-01 |
| P61027 | 55 | 11 | 507,8  | 19325  | Rab10    | 1  | 1,15 | 8,37E-01 |
| Q9CVB6 | 40 | 14 | 186,04 | 76709  | Arpc2    | 0  | 0,96 | 9,76E-01 |
| Q8BVI4 | 47 | 7  | 152,15 | 110391 | Qdpr     | 0  | 0,89 | 7,99E-01 |
| O35129 | 55 | 15 | 406,82 | 12034  | Phb2     | 0  | 0,94 | 9,56E-01 |
| Q61553 | 40 | 19 | 261,85 | 14086  | Fscn1    | 0  | 0,92 | 9,21E-01 |

|            |    |    |         |        |          |   |      |          |
|------------|----|----|---------|--------|----------|---|------|----------|
| O88447     | 35 | 15 | 174,78  |        | Klc1     | 4 | 1,22 | 7,09E-01 |
| Q9DCT2     | 41 | 13 | 167,61  | 68349  | Ndufs3   | 0 | 0,80 | 5,64E-01 |
| Q9JJK2     | 37 | 14 | 180,84  | 71835  | Lanc12   | 0 | 1,03 | 9,85E-01 |
| Q8BIZ1     | 11 | 16 | 268,49  | 77531  | Anks1b   | 0 | 1,02 | 9,97E-01 |
| Q9EQF6     | 31 | 18 | 169,51  | 65254  | Dpysl5   | 0 | 1,20 | 7,38E-01 |
| Q8BKZ9     | 37 | 14 | 238,82  | 27402  | Pdhx     | 0 | 1,04 | 9,77E-01 |
| Q810U4     | 20 | 19 | 170,46  | 319504 | Nrcam    | 0 | 1,10 | 9,34E-01 |
| Q9QYG0     | 40 | 9  | 218,56  | 29811  | Ndrp2    | 0 | 1,04 | 9,76E-01 |
| Q8BWS5     | 30 | 17 | 156,06  | 243385 | Gprin3   | 0 | 0,91 | 9,07E-01 |
| P19157     | 56 | 9  | 141,85  | 14870  | Gstp1    | 2 | 0,85 | 7,52E-01 |
| Q9JKC6     | 70 | 10 | 152,78  | 57754  | Cend1    | 0 | 0,94 | 9,56E-01 |
| E9Q6P5     | 27 | 20 | 113,66  | 104718 | Ttc7b    | 0 | 0,99 | 9,85E-01 |
| Q68FF6     | 29 | 18 | 163,67  | 216963 | Git1     | 0 | 1,17 | 8,07E-01 |
| Q60625     | 22 | 16 | 196,07  | 15898  | Icam5    | 0 | 1,23 | 7,09E-01 |
| Q9ESW4     | 44 | 15 | 203,5   | 69923  | Agk      | 0 | 0,99 | 9,85E-01 |
| Q9CWK8     | 37 | 14 | 130,04  | 67804  | Snx2     | 2 | 1,07 | 9,73E-01 |
| Q91VN4     | 43 | 11 | 166,31  | 66098  | Chchd6   | 0 | 0,82 | 6,69E-01 |
| Q8BRT1     | 21 | 19 | 116,42  | 76499  | Clasp2   | 3 | 1,13 | 8,70E-01 |
| Q61327     | 26 | 17 | 403,45  | 13162  | Slc6a3   | 1 | 2,66 | 8,05E-09 |
| Q9JJY3     | 29 | 14 | 216,78  | 58994  | Smpd3    | 0 | 0,89 | 8,68E-01 |
| Q8BGH2     | 40 | 18 | 191,08  | 68653  | Samm50   | 0 | 0,76 | 3,87E-01 |
| P16054     | 25 | 19 | 112,73  | 18754  | Prkce    | 0 | 1,02 | 1,00E+00 |
| P12367     | 32 | 7  | 221,7   |        | Prkar2a  | 0 | 1,23 | 6,80E-01 |
| P04104     | 10 | 3  | 2720,03 | 16678  | Krt1     | 1 | 1,24 | 7,36E-01 |
| Q8CGK7     | 42 | 10 | 417,97  | 14680  | Gnal     | 3 | 0,87 | 8,01E-01 |
| Q9D6J6     | 50 | 10 | 266,04  | 72900  | Ndufv2   | 0 | 0,66 | 5,63E-02 |
| K1H4_HUMAN | 45 | 6  | 169,92  |        |          | 0 | 4,45 | 1,60E-16 |
| Q91VR2     | 39 | 14 | 398,95  | 11949  | Atp5f1c  | 0 | 0,70 | 1,44E-01 |
| Q6WVG3     | 41 | 11 | 165,22  | 239217 | Kctd12   | 2 | 0,76 | 4,04E-01 |
| Q8VDM4     | 24 | 19 | 144,85  | 21762  | Psmd2    | 0 | 1,12 | 9,12E-01 |
| Q99LC3     | 31 | 15 | 266,02  | 67273  | Ndufa10  | 0 | 0,78 | 4,50E-01 |
| Q9WTT4     | 42 | 6  | 128,5   | 66237  | Atp6v1g2 | 0 | 1,20 | 7,39E-01 |
| Q9R1Q8     | 67 | 14 | 262,99  | 56370  | Tagln3   | 0 | 1,35 | 3,45E-01 |
| Q8VED5     | 18 | 3  | 1425,55 | 223917 | Krt79    | 1 | 1,33 | 6,70E-01 |
| P31938     | 24 | 7  | 238,8   | 26395  | Map2k1   | 6 | 1,01 | 1,00E+00 |
| P18760     | 64 | 10 | 281,12  | 12631  | Cfl1     | 3 | 0,94 | 9,64E-01 |
| P30275     | 32 | 15 | 219,4   | 12716  | Ckmt1    | 0 | 0,99 | 9,87E-01 |
| Q64133     | 33 | 15 | 244,19  | 17161  | Maoa     | 0 | 1,18 | 7,74E-01 |
| P35438     | 23 | 24 | 271,81  | 14810  | Grin1    | 0 | 0,98 | 9,81E-01 |
| ADH1_YEAST | 42 | 14 | 163,31  |        |          | 0 | 1,01 | 1,00E+00 |
| Q6IFZ6     | 15 | 4  | 2408,92 | 406220 | Krt77    | 0 | 1,01 | 1,00E+00 |
| P01831     | 33 | 6  | 618,17  | 21838  | Thy1     | 0 | 0,97 | 9,76E-01 |
| P51863     | 41 | 17 | 255,93  | 11972  | Atp6v0d1 | 0 | 1,19 | 7,62E-01 |
| Q62418     | 38 | 14 | 120,77  | 13169  | Dbnl     | 0 | 0,99 | 9,81E-01 |
| Q99KY4     | 17 | 19 | 111,09  | 231580 | Gak      | 0 | 1,18 | 8,01E-01 |
| Q3V3R1     | 25 | 21 | 152,87  | 270685 | Mthfd11  | 0 | 1,04 | 9,78E-01 |

|                 |    |    |        |                                   |          |   |      |          |
|-----------------|----|----|--------|-----------------------------------|----------|---|------|----------|
| Q8BGQ7          | 22 | 18 | 131,1  | 234734                            | Aars1    | 0 | 1,00 | 1,00E+00 |
| P70404          | 36 | 13 | 208,25 | 15929                             | Idh3g    | 0 | 0,96 | 9,76E-01 |
| Q9D8Y0          | 49 | 15 | 175,48 |                                   | Efhd2    | 0 | 0,89 | 8,58E-01 |
| Q9EQZ6          | 24 | 24 | 124,07 | 56508                             | Rapgef4  | 0 | 1,00 | 1,00E+00 |
| P57746          | 44 | 14 | 190,94 | 73834                             | Atp6v1d  | 0 | 1,17 | 8,07E-01 |
| Q9Z1L5          | 18 | 19 | 166,03 | 12294                             | Cacna2d3 | 0 | 0,86 | 7,99E-01 |
| Q68FL4          | 24 | 5  | 232,8  | 74340                             | Ahcyl2   | 0 | 1,10 | 9,50E-01 |
| PRDX1_H<br>UMAN | 57 | 7  | 394,73 | 100994<br>710;<br>456537;<br>5052 | PRDX1    | 2 | 1,47 | 1,25E-01 |
| Q8C419          | 18 | 18 | 143,09 | 241263                            | Gpr158   | 0 | 1,07 | 9,74E-01 |
| Q3UHK6          | 11 | 25 | 66,34  | 23966                             | Tenm4    | 6 | 1,14 | 8,66E-01 |
| Q9D1A2          | 34 | 15 | 168,2  | 66054                             | Cndp2    | 0 | 1,02 | 9,94E-01 |
| Q921G7          | 33 | 18 | 143,22 | 66841                             | Etfdh    | 0 | 0,94 | 9,55E-01 |
| Q9QYS2          | 21 | 16 | 226,78 | 108069                            | Grm3     | 0 | 0,87 | 8,02E-01 |
| P21836          | 28 | 14 | 115,95 | 11423                             | Ache     | 0 | 1,26 | 6,37E-01 |
| P70296          | 63 | 8  | 258,68 | 23980                             | Pebp1    | 0 | 1,16 | 8,19E-01 |
| Q8R3V5          | 31 | 14 | 228,06 | 227700                            | Sh3glb2  | 1 | 1,13 | 8,89E-01 |
| Q8CAA7          | 26 | 17 | 182,64 | 70974                             | Pgm211   | 0 | 1,10 | 9,45E-01 |
| Q9CZ44          | 53 | 15 | 177,96 | 386649                            | Nsfl1c   | 0 | 0,95 | 9,59E-01 |
| Q9EPJ9          | 39 | 12 | 111,95 | 228998                            | Arfgap1  | 0 | 1,15 | 8,42E-01 |
| Q9JM52          | 19 | 13 | 101,79 | 50932                             | Mink1    | 8 | 0,94 | 9,62E-01 |
| Q14BI2          | 20 | 17 | 167,78 | 108068                            | Grm2     | 3 | 0,96 | 9,76E-01 |
| Q61792          | 45 | 13 | 213,86 | 16796                             | Lasp1    | 1 | 1,02 | 9,96E-01 |
| Q8BLE7          | 19 | 11 | 209,28 | 140919                            | Slc17a6  | 0 | 1,08 | 9,59E-01 |
| Q9WV55          | 41 | 9  | 225,82 | 30960                             | Vapa     | 1 | 1,04 | 9,76E-01 |
| P48320          | 24 | 10 | 134,1  | 14417                             | Gad2     | 1 | 0,96 | 9,74E-01 |
| Q80XN0          | 35 | 11 | 180,8  | 71911                             | Bdh1     | 0 | 0,72 | 2,11E-01 |
| P80317          | 28 | 15 | 186,71 | 12466                             | Cct6a    | 0 | 1,17 | 8,06E-01 |
| O88448          | 35 | 14 | 193,81 |                                   | Klc2     | 0 | 1,21 | 7,02E-01 |
| P21278          | 42 | 10 | 205,75 | 14672                             | Gna11    | 0 | 0,91 | 9,16E-01 |
| Q9DBF1          | 32 | 16 | 159,84 | 110695                            | Aldh7a1  | 0 | 0,81 | 6,06E-01 |
| Q8R429          | 15 | 14 | 255,53 | 11937                             | Atp2a1   | 0 | 0,99 | 9,91E-01 |
| P31650          | 19 | 12 | 194,74 | 243616                            | Slc6a11  | 1 | 0,92 | 9,34E-01 |
| Q9Z268          | 23 | 16 | 145,25 | 19415                             | Rasal1   | 0 | 1,07 | 9,66E-01 |
| Q99JY9          | 36 | 12 | 215,92 | 74117                             | Actr3    | 2 | 0,94 | 9,56E-01 |
| Q3UVL4          | 24 | 16 | 111,97 | 68505                             | Vps51    | 0 | 1,02 | 1,00E+00 |
| O88844          | 36 | 13 | 164,96 | 15926                             | Idh1     | 0 | 0,99 | 9,93E-01 |
| Q3UMR5          | 27 | 11 | 143,37 | 215999                            | Mcu      | 0 | 0,70 | 1,69E-01 |
| P70206          | 14 | 17 | 82,47  | 18844                             | Plxna1   | 1 | 1,01 | 1,00E+00 |
| Q9ER00          | 45 | 10 | 136,44 | 100226                            | Stx12    | 0 | 1,08 | 9,66E-01 |
| Q8VDQ8          | 32 | 12 | 170,47 | 64383                             | Sirt2    | 0 | 0,89 | 8,82E-01 |
| Q6P9K8          | 20 | 18 | 119,3  | 268932                            | Caskin1  | 0 | 1,21 | 7,09E-01 |
| Q6NZL0          | 22 | 19 | 179,59 | 67412                             | Soga3    | 0 | 0,92 | 9,24E-01 |
| Q9CPW0          | 15 | 16 | 145,96 | 66797                             | Cntnap2  | 0 | 1,04 | 9,78E-01 |
| P35492          | 22 | 15 | 106,96 | 15109                             | Hal      | 0 | 1,05 | 9,76E-01 |
| P20444          | 21 | 6  | 157,52 | 18750                             | Prkca    | 0 | 1,62 | 2,69E-02 |

|        |    |    |        |        |         |    |      |          |
|--------|----|----|--------|--------|---------|----|------|----------|
| Q80Z24 | 39 | 12 | 202,95 | 320840 | Negr1   | 0  | 0,82 | 6,42E-01 |
| Q148V7 | 20 | 21 | 106,21 | 227446 | Relch   | 0  | 1,01 | 9,99E-01 |
| P51150 | 65 | 13 | 216,29 | 19349  | Rab7a   | 0  | 1,05 | 9,76E-01 |
| P26040 | 24 | 9  | 157,59 | 22350  | Ezr     | 9  | 0,82 | 6,46E-01 |
| Q80TB8 | 40 | 15 | 206,09 | 270097 | Vat11   | 0  | 1,26 | 6,01E-01 |
| Q3UHB1 | 30 | 17 | 176,28 | 103466 | Nt5dc3  | 0  | 0,99 | 9,85E-01 |
| P46471 | 47 | 20 | 133,31 | 19181  | Psmc2   | 0  | 1,14 | 8,53E-01 |
| Q99NE5 | 17 | 21 | 75,1   | 116837 | Rims1   | 0  | 1,26 | 6,05E-01 |
| Q61753 | 28 | 13 | 212,92 | 236539 | Phgdh   | 0  | 0,80 | 5,95E-01 |
| Q9JLB0 | 32 | 15 | 193,6  | 56524  | Mpp6    | 0  | 1,02 | 9,99E-01 |
| A2ALS5 | 28 | 15 | 102,14 | 110351 | Rap1gap | 1  | 1,02 | 1,00E+00 |
| Q8C8N2 | 27 | 15 | 101,25 | 320271 | Scai    | 0  | 1,19 | 7,50E-01 |
| Q63844 | 43 | 8  | 172,17 | 26417  | Mapk3   | 0  | 1,23 | 6,66E-01 |
| O88643 | 31 | 7  | 110,06 |        | Pak1    | 10 | 0,90 | 8,63E-01 |
| Q6R891 | 24 | 16 | 93     | 217124 | Ppp1r9b | 0  | 1,03 | 9,91E-01 |
| Q80TQ2 | 20 | 18 | 169,08 | 74256  | Cyld    | 0  | 0,98 | 9,83E-01 |
| Q6IME9 | 11 | 3  | 606,85 | 105866 | Krt72   | 0  | 1,24 | 6,33E-01 |
| Q9Z0R4 | 16 | 20 | 36,21  | 16443  | Itsn1   | 4  | 1,00 | 9,97E-01 |
| Q9JLM8 | 23 | 14 | 106,41 | 13175  | Dclk1   | 0  | 1,06 | 9,76E-01 |
| O88712 | 34 | 14 | 280,91 | 13016  | Ctbp1   | 0  | 1,23 | 6,66E-01 |
| Q68FH0 | 23 | 18 | 120,63 | 227937 | Pkp4    | 0  | 1,08 | 9,56E-01 |
| P35279 | 47 | 4  | 352,8  | 19346  | Rab6a   | 0  | 1,33 | 4,42E-01 |
| P70336 | 17 | 21 | 70,07  | 19878  | Rock2   | 0  | 1,06 | 9,76E-01 |
| P62881 | 31 | 10 | 163,34 | 14697  | Gnb5    | 0  | 1,18 | 7,94E-01 |
| Q99LX0 | 53 | 10 | 190,93 | 57320  | Park7   | 0  | 1,06 | 9,76E-01 |
| Q5FWK3 | 34 | 14 | 146,32 | 228359 | Arhgap1 | 0  | 1,00 | 1,00E+00 |
| Q7TMF3 | 71 | 11 | 163,38 | 66414  | Ndufa12 | 0  | 1,17 | 8,01E-01 |
| Q9CRB9 | 31 | 11 | 234,14 | 66075  | Chchd3  | 0  | 0,78 | 4,61E-01 |
| Q61036 | 35 | 5  | 90,33  | 18481  | Pak3    | 3  | 1,11 | 9,25E-01 |
| Q8BJ42 | 22 | 16 | 80,32  | 244310 | Dlgap2  | 1  | 0,96 | 9,76E-01 |
| A2APX8 | 9  | 9  | 51,97  | 20265  | Scn1a   | 0  | 1,04 | 9,78E-01 |
| Q8JZS0 | 45 | 4  | 200,88 | 108030 | Lin7a   | 6  | 1,06 | 9,76E-01 |
| Q8K183 | 32 | 9  | 184,85 | 216134 | Pdxk    | 0  | 1,18 | 8,02E-01 |
| Q9EP69 | 33 | 19 | 137,91 | 83493  | Sacm11  | 0  | 1,17 | 8,09E-01 |
| Q791V5 | 39 | 10 | 250,35 | 56428  | Mtch2   | 0  | 0,75 | 3,57E-01 |
| Q99K51 | 30 | 12 | 104,63 | 102866 | Pls3    | 5  | 1,01 | 1,00E+00 |
| Q9CR68 | 25 | 10 | 196,99 | 66694  | Uqcrfs1 | 0  | 0,91 | 9,19E-01 |
| P84075 | 64 | 6  | 170,68 | 15444  | Hpca    | 7  | 0,96 | 9,76E-01 |
| P63330 | 46 | 3  | 178    | 19052  | Ppp2ca  | 11 | 0,90 | 8,91E-01 |
| Q7TME0 | 27 | 16 | 112,32 | 229791 | Plppr4  | 0  | 1,20 | 7,89E-01 |
| Q99PJ0 | 31 | 11 | 242,74 |        | Ntm     | 0  | 0,97 | 9,76E-01 |
| Q9DCJ5 | 48 | 8  | 170,74 | 68375  | Ndufa8  | 0  | 0,98 | 9,81E-01 |
| P54071 | 43 | 17 | 119,1  | 269951 | Idh2    | 1  | 0,83 | 6,74E-01 |
| Q9DB20 | 72 | 15 | 260,95 | 28080  | Atp5po  | 0  | 0,75 | 3,46E-01 |
| Q8VE33 | 26 | 9  | 167,29 |        | Gdap111 | 0  | 0,98 | 9,85E-01 |
| Q9JLV5 | 23 | 15 | 103,99 | 26554  | Cul3    | 0  | 1,08 | 9,56E-01 |
| Q61165 | 17 | 11 | 100,62 | 20544  | Slc9a1  | 0  | 0,86 | 7,86E-01 |



|            |    |    |         |        |          |   |      |          |
|------------|----|----|---------|--------|----------|---|------|----------|
| Q9CZT8     | 37 | 4  | 493,25  | 69908  | Rab3b    | 0 | 0,94 | 9,55E-01 |
| Q9WUB3     | 23 | 10 | 164,99  | 19309  | Pygm     | 0 | 0,90 | 9,02E-01 |
| Q7TT50     | 13 | 18 | 78,47   | 217866 | Cdc42bpb | 4 | 1,09 | 9,59E-01 |
| Q8JZN5     | 29 | 17 | 115,98  | 229211 | Acad9    | 0 | 0,85 | 7,37E-01 |
| Q8BP47     | 26 | 14 | 83,03   | 70223  | NARS1    | 0 | 1,42 | 1,94E-01 |
| Q9DCN2     | 32 | 10 | 158,5   | 109754 | Cyb5r3   | 0 | 1,05 | 9,77E-01 |
| O55022     | 49 | 10 | 151,04  | 53328  | Pgrmc1   | 1 | 1,12 | 9,12E-01 |
| O88544     | 33 | 11 | 129,7   | 26891  | Cops4    | 0 | 0,93 | 9,33E-01 |
| Q9CPV4     | 49 | 13 | 121,01  | 67201  | Glod4    | 0 | 0,97 | 9,76E-01 |
| Q9JJK7     | 38 | 12 | 111,63  | 50876  | Tmod2    | 1 | 0,90 | 9,02E-01 |
| Q80VP1     | 22 | 9  | 52      | 13854  | Epn1     | 0 | 1,13 | 8,85E-01 |
| O35874     | 17 | 7  | 107,98  | 55963  | Slc1a4   | 0 | 0,90 | 8,53E-01 |
| Q8R3Z5     | 35 | 10 | 104,52  | 12295  | Cacnb1   | 5 | 1,06 | 9,76E-01 |
| P83510     | 18 | 11 | 104,76  | 665113 | Tnik     | 0 | 0,85 | 6,91E-01 |
| Q0KL02     | 7  | 15 | 38,4    | 223435 | Trio     | 5 | 1,13 | 9,02E-01 |
| Q60829     | 69 | 7  | 106,26  | 19049  | Ppp1r1b  | 0 | 0,90 | 8,53E-01 |
| Q3UIJ4     | 18 | 19 | 96,65   | 13194  | Ddb1     | 0 | 0,96 | 9,76E-01 |
| P99029     | 46 | 10 | 240,97  | 54683  | Prdx5    | 0 | 0,78 | 4,77E-01 |
| P62715     | 43 | 2  | 168,46  | 19053  | Ppp2cb   | 0 | 1,02 | 1,00E+00 |
| P19246     | 15 | 14 | 169,65  | 380684 | Nefh     | 0 | 1,28 | 5,92E-01 |
| P33173     | 14 | 22 | 72,81   |        | Kif1a    | 0 | 0,92 | 8,91E-01 |
| Q9R0N7     | 31 | 12 | 134,14  | 54525  | Syt7     | 0 | 1,30 | 4,61E-01 |
| P80313     | 32 | 16 | 142,36  | 12468  | Cct7     | 0 | 1,11 | 9,18E-01 |
| P08730     | 18 | 3  | 1329,28 | 16663  | Krt13    | 2 | 1,02 | 1,00E+00 |
| P15532     | 55 | 5  | 268,43  | 18102  | Nme1     | 6 | 1,06 | 9,72E-01 |
| Q61481     | 28 | 10 | 106,58  | 18573  | Pde1a    | 0 | 0,99 | 9,78E-01 |
| K1H6_HUMAN | 37 | 10 | 417,08  | 8689   | KRT36    | 5 | 4,53 | 1,60E-16 |
| Q9QY76     | 38 | 7  | 213,15  |        | Vapb     | 0 | 1,24 | 6,44E-01 |
| P35585     | 41 | 14 | 119,02  | 11767  | Ap1m1    | 0 | 0,92 | 9,16E-01 |
| P48758     | 54 | 11 | 171,4   | 12408  | Cbr1     | 1 | 1,02 | 1,00E+00 |
| Q3TDK6     | 53 | 14 | 148,04  | 66049  | Rogdi    | 0 | 1,14 | 8,54E-01 |
| Q6PER3     | 36 | 11 | 195,62  | 100732 | Mapre3   | 2 | 1,15 | 8,37E-01 |
| Q80X80     | 27 | 12 | 112,14  | 71764  | C2cd2l   | 0 | 1,29 | 5,33E-01 |
| Q9R1V6     | 13 | 11 | 146,5   | 11496  | Adam22   | 0 | 0,94 | 9,64E-01 |
| Q8BH66     | 25 | 13 | 182,77  | 73991  | At1l     | 1 | 1,10 | 9,48E-01 |
| P97350     | 19 | 12 | 131,49  | 18772  | Pkp1     | 0 | 1,27 | 5,69E-01 |
| O54828     | 23 | 16 | 116,04  | 19739  | Rgs9     | 0 | 0,93 | 9,32E-01 |
| Q9CXJ4     | 26 | 15 | 101,28  | 74610  | Abcb8    | 0 | 0,89 | 8,60E-01 |
| Q9JLN9     | 11 | 24 | 28,66   | 56717  | Mtor     | 0 | 1,32 | 4,52E-01 |
| P61294     | 45 | 4  | 333,53  | 270192 | Rab6b    | 8 | 1,23 | 6,58E-01 |
| P62631     | 24 | 5  | 334,72  | 13628  | Eef1a2   | 0 | 0,94 | 9,56E-01 |
| Q8BSS9     | 16 | 16 | 83,01   | 327814 | Ppfia2   | 0 | 1,24 | 6,72E-01 |
| O35609     | 30 | 8  | 124,82  | 24045  | Scamp3   | 0 | 1,15 | 8,50E-01 |
| Q61137     | 17 | 15 | 69,31   | 11899  | Astn1    | 0 | 1,21 | 7,46E-01 |
| Q9WVK8     | 38 | 17 | 69,8    | 13116  | Cyp46a1  | 0 | 0,95 | 9,64E-01 |
| Q8BNW9     | 29 | 13 | 142,21  | 74901  | Kbtbd11  | 0 | 1,14 | 8,69E-01 |

|        |    |    |        |        |         |   |      |          |
|--------|----|----|--------|--------|---------|---|------|----------|
| Q8R366 | 21 | 9  | 200,78 | 140559 | Igsf8   | 0 | 1,27 | 5,52E-01 |
| Q8BIJ6 | 19 | 16 | 100,3  | 381314 | Iars2   | 0 | 0,67 | 7,30E-02 |
| P62137 | 30 | 5  | 158,06 | 19045  | Ppp1ca  | 5 | 1,04 | 9,77E-01 |
| Q9CQN1 | 20 | 11 | 152,83 | 68015  | Trap1   | 0 | 1,29 | 5,24E-01 |
| Q91YQ5 | 29 | 16 | 126,85 | 103963 | Rpn1    | 0 | 0,89 | 8,57E-01 |
| Q9DBC7 | 33 | 9  | 114,93 | 19084  | Prkar1a | 3 | 0,99 | 9,81E-01 |
| Q8JZP2 | 33 | 11 | 130,95 | 27204  | Syn3    | 0 | 0,95 | 9,50E-01 |
| Q9JII6 | 50 | 14 | 154,19 | 58810  | Akr1a1  | 1 | 0,97 | 9,76E-01 |
| Q922D8 | 19 | 15 | 129,41 | 108156 | Mthfd1  | 0 | 1,04 | 9,89E-01 |
| P55012 | 11 | 10 | 97,45  | 20496  | Slc12a2 | 0 | 1,19 | 7,74E-01 |
| A2RT62 | 29 | 11 | 99,51  | 214931 | Fbxl16  | 0 | 0,98 | 9,78E-01 |
| Q8C729 | 29 | 14 | 149,75 | 213056 | Fam126b | 0 | 1,01 | 1,00E+00 |
| P61205 | 41 | 6  | 207,28 | 11842  | Arf3    | 3 | 1,22 | 6,92E-01 |
| P84078 | 41 | 6  | 207,28 | 11840  | Arf1    | 0 | 1,22 | 6,92E-01 |
| Q8BHE3 | 23 | 6  | 114,6  | 16467  | Atcay   | 0 | 0,93 | 9,27E-01 |
| Q8K400 | 18 | 14 | 128,4  | 78808  | Stxbp5  | 1 | 0,94 | 9,56E-01 |
| Q8BTM8 | 8  | 15 | 28,45  | 192176 | Flna    | 0 | 1,00 | 1,00E+00 |
| Q9ESN6 | 21 | 12 | 74,21  | 80890  | Trim2   | 0 | 1,06 | 9,76E-01 |
| Q99JP7 | 22 | 13 | 103,74 | 207182 | Ggt7    | 0 | 0,97 | 9,76E-01 |
| P70207 | 10 | 8  | 63,41  | 18845  | Plxna2  | 0 | 0,73 | 6,42E-01 |
| Q9JLJ2 | 31 | 14 | 117,03 | 56752  | Aldh9a1 | 0 | 0,88 | 7,90E-01 |
| P32921 | 36 | 14 | 66,64  | 22375  | Wars1   | 0 | 0,97 | 9,74E-01 |
| Q9Z2W0 | 33 | 13 | 44,79  | 13437  | Dnpep   | 0 | 1,08 | 9,64E-01 |
| Q9WUM4 | 27 | 13 | 157,63 | 23790  | Coro1c  | 0 | 1,21 | 7,41E-01 |
| Q9QZX7 | 31 | 8  | 158,02 | 27364  | Srr     | 0 | 1,01 | 1,00E+00 |
| Q9DCS9 | 45 | 8  | 196,17 | 68342  | Ndufb10 | 0 | 0,91 | 9,16E-01 |
| P35803 | 23 | 8  | 216,49 | 14758  | Gpm6b   | 0 | 0,84 | 7,38E-01 |
| Q5DQR4 | 15 | 11 | 116,31 | 207227 | Stxbp5l | 0 | 0,94 | 9,48E-01 |
| P24527 | 29 | 14 | 85,88  | 16993  | Lta4h   | 0 | 1,06 | 9,76E-01 |
| Q91WQ3 | 34 | 18 | 113,3  | 107271 | Yars1   | 0 | 0,93 | 9,56E-01 |
| Q2M3X8 | 22 | 14 | 108,82 | 218194 | Phactr1 | 0 | 1,06 | 9,76E-01 |
| Q00493 | 29 | 12 | 122,94 | 12876  | Cpe     | 0 | 0,91 | 8,91E-01 |
| Q8BG32 | 38 | 14 | 89,95  | 69077  | Psmc11  | 0 | 1,00 | 9,93E-01 |
| Q8R5C5 | 38 | 5  | 179,29 | 226977 | Actr1b  | 6 | 1,08 | 9,56E-01 |
| P18572 | 19 | 7  | 246,78 | 12215  | Bsg     | 0 | 0,75 | 3,18E-01 |
| P63001 | 41 | 4  | 206,04 | 19353  | Rac1    | 3 | 1,33 | 3,83E-01 |
| Q8R5M8 | 21 | 9  | 102,29 | 54725  | Cadm1   | 0 | 1,06 | 9,74E-01 |
| P23506 | 46 | 10 | 62,36  |        | Pcmt1   | 0 | 1,00 | 9,96E-01 |
| Q8BH95 | 35 | 9  | 116,15 | 93747  | Echs1   | 0 | 0,83 | 6,58E-01 |
| Q9WV80 | 29 | 13 | 87,22  | 56440  | Snx1    | 0 | 1,05 | 9,76E-01 |
| Q99JR1 | 45 | 10 | 219,56 | 14057  | Sfxn1   | 0 | 1,12 | 9,13E-01 |
| Q9QYB8 | 21 | 12 | 109,3  | 11519  | Add2    | 0 | 1,05 | 9,76E-01 |
| Q9JLZ3 | 32 | 11 | 117,92 | 11992  | Auh     | 0 | 0,94 | 9,56E-01 |
| Q9D172 | 39 | 10 | 164,42 | 28295  | Gatd3a  | 0 | 0,82 | 6,42E-01 |
| Q5H8C4 | 7  | 22 | 19,72  | 271564 | Vps13a  | 0 | 1,17 | 8,12E-01 |
| Q64516 | 27 | 14 | 104,31 | 14933  | Gk      | 1 | 0,89 | 8,43E-01 |
| Q8BXR1 | 13 | 8  | 106,94 | 241919 | Slc7a14 | 0 | 0,88 | 8,01E-01 |

|                |    |    |        |        |          |   |      |          |
|----------------|----|----|--------|--------|----------|---|------|----------|
| P60487         | 35 | 8  | 105,31 | 57028  | Pdxdp    | 0 | 1,23 | 6,74E-01 |
| Q6WQJ1         | 16 | 17 | 79,04  | 269060 | Dagla    | 0 | 0,91 | 8,88E-01 |
| Q9DC69         | 39 | 13 | 104,02 | 66108  | Ndufa9   | 0 | 0,95 | 9,66E-01 |
| Q6PHS9         | 13 | 15 | 127,31 | 56808  | Cacna2d2 | 0 | 1,10 | 9,26E-01 |
| Q91WS0         | 54 | 6  | 231,22 | 52637  | Cisd1    | 0 | 0,71 | 1,81E-01 |
| P63094         | 28 | 7  | 400,06 | 14683  | Gnas     | 0 | 0,92 | 9,09E-01 |
| Q6R0H7         | 10 | 7  | 400,06 | 14683  | Gnas     | 0 | 0,92 | 9,09E-01 |
| P61021         | 48 | 5  | 262,28 | 19344  | Rab5b    | 4 | 1,21 | 7,09E-01 |
| Q8BYM5         | 16 | 10 | 125,48 | 245537 | Nlgn3    | 2 | 0,91 | 8,95E-01 |
| Q8R0S2         | 20 | 14 | 123,18 | 232227 | Iqsec1   | 5 | 1,19 | 7,69E-01 |
| Q6P1F6         | 29 | 9  | 202,07 | 71978  | Ppp2r2a  | 4 | 1,01 | 1,00E+00 |
| P42208         | 41 | 10 | 73,54  | 18000  | Septin2  | 0 | 1,19 | 7,74E-01 |
| P00405         | 28 | 5  | 256,01 | 17709  | Mtco2    | 0 | 0,84 | 7,12E-01 |
| Q9R0N5         | 16 | 3  | 259,45 |        | Syt5     | 0 | 0,96 | 9,76E-01 |
| CAS1_BO<br>VIN | 34 | 7  | 73,53  | 282208 | CSN1S1   | 0 | 0,55 | 4,39E-02 |
| P62141         | 29 | 4  | 128,05 | 19046  | Ppp1cb   | 1 | 1,12 | 9,19E-01 |
| Q9D394         | 35 | 14 | 91,86  | 52822  | Rufy3    | 0 | 1,06 | 9,74E-01 |
| Q9D0F9         | 27 | 14 | 99,68  | 72157  | Pgm1     | 0 | 1,36 | 3,20E-01 |
| Q64514         | 18 | 19 | 46,58  | 22019  | Tpp2     | 0 | 0,92 | 9,02E-01 |
| Q925N0         | 33 | 8  | 135,41 | 94282  | Sfxn5    | 0 | 0,93 | 9,32E-01 |
| O55234         | 38 | 11 | 172,68 | 19173  | Psmb5    | 0 | 1,21 | 7,13E-01 |
| O88910         | 28 | 12 | 69,4   |        | Mpp3     | 0 | 1,05 | 9,76E-01 |
| Q64105         | 48 | 10 | 90,56  |        | Spr      | 0 | 1,08 | 9,74E-01 |
| Q9R0Q6         | 34 | 12 | 148,25 | 56443  | Arpc1a   | 0 | 1,03 | 9,87E-01 |
| K1M2_SH<br>EEP | 33 | 3  | 135,46 |        |          | 0 | 1,31 | 8,34E-01 |
| O88998         | 23 | 9  | 60,91  | 56177  | Olfm1    | 0 | 0,97 | 9,76E-01 |
| Q8VHH5         | 14 | 9  | 128,58 |        | Agap3    | 2 | 1,01 | 9,99E-01 |
| Q8R0A7         | 31 | 12 | 120,7  | 234797 | Kiaa0513 | 0 | 0,96 | 9,70E-01 |
| Q9CQX2         | 45 | 6  | 98,92  | 66427  | Cyb5b    | 0 | 0,61 | 1,29E-02 |
| Q9CWJ9         | 31 | 15 | 78,89  | 108147 | Atic     | 0 | 1,35 | 3,18E-01 |
| Q6PFD5         | 20 | 15 | 103,84 | 242667 | Dlgap3   | 0 | 1,14 | 8,53E-01 |
| P48678         | 23 | 17 | 38,91  | 16905  | Lmna     | 0 | 1,00 | 9,94E-01 |
| Q56A07         | 37 | 8  | 130,33 | 72821  | Scn2b    | 0 | 0,83 | 6,75E-01 |
| Q812A2         | 17 | 17 | 85,3   | 259302 | Srgap3   | 0 | 1,11 | 9,19E-01 |
| Q01768         | 47 | 2  | 216,79 | 18103  | Nme2     | 0 | 1,13 | 8,95E-01 |
| Q3UYC0         | 34 | 13 | 102,54 | 319468 | Ppm1h    | 0 | 0,99 | 9,87E-01 |
| Q9Z140         | 28 | 13 | 106,2  | 12891  | Cpne6    | 0 | 1,14 | 8,93E-01 |
| Q6PAJ1         | 16 | 15 | 74,29  | 110279 | Bcr      | 2 | 1,15 | 8,59E-01 |
| O88741         | 21 | 9  | 179,85 | 14545  | Gdap1    | 0 | 0,96 | 9,74E-01 |
| P61164         | 35 | 4  | 167,06 | 54130  | Actr1a   | 0 | 1,11 | 9,24E-01 |
| Q5SSL4         | 18 | 11 | 87,63  | 109934 | Abr      | 0 | 0,92 | 9,14E-01 |
| P63321         | 34 | 5  | 174,75 | 56044  | Rala     | 6 | 1,21 | 7,39E-01 |
| P63087         | 25 | 2  | 125,96 | 19047  | Ppp1cc   | 0 | 1,00 | 9,99E-01 |
| Q8R016         | 24 | 11 | 92,24  | 104184 | Blmh     | 0 | 0,67 | 4,66E-02 |
| P70414         | 12 | 11 | 99,99  | 20541  | Slc8a1   | 0 | 0,98 | 9,81E-01 |
| Q61166         | 44 | 9  | 101,79 | 13589  | Mapre1   | 0 | 1,21 | 6,96E-01 |

|            |    |    |         |               |                  |   |      |          |
|------------|----|----|---------|---------------|------------------|---|------|----------|
| O88485     | 25 | 10 | 107,38  | 13426         | Dync1i1          | 2 | 1,20 | 7,33E-01 |
| P11679     | 12 | 2  | 1144,08 | 16691         | Krt8             | 1 | 0,69 | 1,41E-01 |
| Q9D1T0     | 20 | 11 | 92,97   | 235402        | Lingo1           | 0 | 1,05 | 9,78E-01 |
| CATD_HUMAN | 26 | 9  | 150,15  | 1509          | CTSD; HEL-S-130P | 2 | 1,11 | 9,28E-01 |
| O35857     | 31 | 13 | 52,99   | 21856         | Timm44           | 0 | 1,08 | 9,74E-01 |
| Q8R5H6     | 20 | 9  | 134,25  | 83767         | Wasf1            | 0 | 1,39 | 2,14E-01 |
| Q5SWU9     | 10 | 20 | 26,22   | 107476        | Acaca            | 0 | 1,30 | 5,06E-01 |
| Q7TSF1     | 6  | 8  | 153,4   | 225256        | Dsg1b            | 0 | 1,04 | 9,78E-01 |
| O88343     | 13 | 11 | 87,14   | 54403         | Slc4a4           | 1 | 0,72 | 1,34E-01 |
| Q62419     | 33 | 7  | 174,55  | 20405         | Sh3gl1           | 0 | 1,22 | 7,45E-01 |
| Q8CAY6     | 37 | 12 | 96,79   | 110460        | Acat2            | 0 | 1,06 | 9,76E-01 |
| Q62277     | 16 | 6  | 499,45  | 20977         | Syp              | 0 | 1,01 | 1,00E+00 |
| Q07076     | 33 | 14 | 153,22  | 11750         | Anxa7            | 0 | 1,07 | 9,70E-01 |
| Q9D2G2     | 25 | 11 | 246,15  | 78920         | Dlst             | 0 | 0,89 | 8,58E-01 |
| Q60737     | 25 | 7  | 124,46  | 12995         | Csnk2a1          | 1 | 1,01 | 1,00E+00 |
| Q80TS3     | 9  | 12 | 101,51  | 319387        | Adgrl3           | 0 | 0,89 | 8,49E-01 |
| Q9CPQ3     | 67 | 6  | 93,53   | 223696        | Tomm22           | 0 | 0,84 | 7,06E-01 |
| P41216     | 25 | 17 | 119,57  | 14081         | Acs11            | 0 | 0,76 | 2,99E-01 |
| Q9DCW4     | 49 | 12 | 199,88  | 110826        | Etfb             | 0 | 0,95 | 9,69E-01 |
| Q8BLK3     | 33 | 11 | 254,07  |               | Lsamp            | 0 | 1,10 | 9,32E-01 |
| Q6NS52     | 23 | 14 | 112,54  | 217480        | Dgkb             | 0 | 0,97 | 9,76E-01 |
| Q8BSL7     | 30 | 5  | 171,03  | 11841         | Arf2             | 0 | 1,22 | 6,94E-01 |
| Q03059     | 21 | 12 | 79,66   |               | Chat             | 0 | 0,97 | 9,74E-01 |
| Q9CWS0     | 39 | 8  | 139,01  | 69219         | Ddah1            | 1 | 0,90 | 9,00E-01 |
| Q8C163     | 23 | 8  | 80,72   | 208194        | Exog             | 0 | 0,57 | 3,46E-03 |
| P29341     | 21 | 13 | 132,18  | 18458         | Pabpc1           | 0 | 1,13 | 8,97E-01 |
| Q61171     | 63 | 10 | 257,15  | 21672         | Prdx2            | 0 | 1,32 | 4,18E-01 |
| A2AQ25     | 12 | 19 | 37,94   | 208618        | Skt              | 0 | 1,08 | 9,64E-01 |
| Q9Z2W8     | 13 | 5  | 108,87  | 14802         | Gria4            | 0 | 1,25 | 8,50E-01 |
| Q8BMG7     | 14 | 18 | 58,84   | 98732         | Rab3gap2         | 0 | 1,01 | 1,00E+00 |
| Q8R570     | 35 | 11 | 125,84  | 67826         | Snap47           | 0 | 0,94 | 9,42E-01 |
| Q9Z2U0     | 39 | 10 | 122,6   | 26444         | Psma7            | 0 | 1,13 | 8,89E-01 |
| Q9CPY7     | 35 | 14 | 93,67   | 66988         | Lap3             | 0 | 0,71 | 1,33E-01 |
| Q80Z38     | 15 | 15 | 84,82   | 210274        | Shank2           | 0 | 1,09 | 9,56E-01 |
| P51660     | 22 | 13 | 109,08  | 15488         | Hsd17b4          | 0 | 1,00 | 1,00E+00 |
| P49615     | 35 | 8  | 131,95  | 12568         | Cdk5             | 0 | 1,24 | 6,74E-01 |
| P50247     | 25 | 9  | 172,49  | 11615; 269378 | Ahcy             | 0 | 1,04 | 9,79E-01 |
| Q6PE13     | 19 | 13 | 78,85   | 210673        | Prrt3            | 0 | 1,02 | 1,00E+00 |
| Q8BHN3     | 15 | 13 | 90,27   | 14376         | Ganab            | 0 | 0,69 | 1,21E-01 |
| Q91ZJ5     | 29 | 15 | 112,87  | 216558        | Ugp2             | 0 | 1,05 | 9,76E-01 |
| P03995     | 36 | 14 | 126,14  | 14580         | Gfap             | 0 | 0,97 | 9,74E-01 |
| Q91ZP9     | 27 | 11 | 72,02   | 117148        | Necab2           | 0 | 1,09 | 9,59E-01 |
| B9EJA2     | 13 | 18 | 63,76   | 30785         | Cttnbp2          | 0 | 1,12 | 9,11E-01 |
| Q9D1G1     | 55 | 4  | 369,43  | 76308         | Rab1b            | 0 | 1,11 | 9,17E-01 |
| P61202     | 30 | 12 | 85,18   | 12848         | Cops2            | 0 | 0,88 | 8,04E-01 |

|        |    |    |        |        |          |   |      |          |
|--------|----|----|--------|--------|----------|---|------|----------|
| Q9DC51 | 30 | 5  | 419,39 | 14679  | Gnai3    | 0 | 0,81 | 5,72E-01 |
| Q7TQI3 | 40 | 9  | 164,45 | 107260 | Otub1    | 0 | 0,86 | 7,61E-01 |
| E9Q7X7 | 10 | 10 | 91,04  |        | Nrxn2    | 0 | 1,05 | 9,76E-01 |
| Q9QZF2 | 23 | 9  | 98,16  | 14733  | Gpc1     | 0 | 0,87 | 7,89E-01 |
| P26043 | 19 | 4  | 88,29  | 19684  | Rdx      | 0 | 1,02 | 1,00E+00 |
| Q61495 | 5  | 7  | 150,15 | 13510  | Dsg1a    | 0 | 0,99 | 9,87E-01 |
| Q60676 | 30 | 13 | 54,84  | 19060  | Ppp5c    | 0 | 1,26 | 6,23E-01 |
| Q5SRX1 | 26 | 9  | 65,6   | 216810 | Tom1l2   | 0 | 1,15 | 8,85E-01 |
| Q92511 | 27 | 15 | 125,17 | 108888 | Atad3    | 0 | 0,89 | 8,70E-01 |
| Q99K85 | 30 | 10 | 152,01 | 107272 | Psat1    | 0 | 0,81 | 5,42E-01 |
| P48036 | 39 | 13 | 94,25  | 11747  | Anxa5    | 0 | 0,95 | 9,74E-01 |
| O08529 | 20 | 12 | 80,53  | 12334  | Capn2    | 0 | 1,09 | 9,56E-01 |
| P61226 | 40 | 5  | 139,86 | 74012  | Rap2b    | 3 | 0,90 | 9,02E-01 |
| P62812 | 25 | 9  | 135,42 | 14394  | Gabra1   | 4 | 1,12 | 9,19E-01 |
| Q8BWT1 | 39 | 12 | 104,81 | 52538  | Acaa2    | 0 | 0,60 | 6,52E-03 |
| Q8BLF1 | 21 | 10 | 118,85 | 320024 | Nceh1    | 0 | 0,85 | 7,38E-01 |
| Q9R0X4 | 28 | 13 | 105,49 | 56360  | Acot9    | 0 | 1,00 | 9,85E-01 |
| Q9WTP7 | 46 | 11 | 62,41  | 56248  | Ak3      | 0 | 0,79 | 5,24E-01 |
| P14685 | 32 | 14 | 31,61  | 22123  | Psmd3    | 0 | 1,22 | 6,98E-01 |
| P49025 | 9  | 19 | 41,86  | 12704  | Cit      | 0 | 1,25 | 6,42E-01 |
| Q8CIN4 | 27 | 4  | 59,28  | 224105 | Pak2     | 0 | 1,01 | 1,00E+00 |
| Q9QYB5 | 18 | 11 | 94,64  | 27360  | Add3     | 0 | 1,05 | 9,76E-01 |
| O55126 | 27 | 10 | 136,83 |        | Nipsnap2 | 0 | 0,90 | 8,93E-01 |
| Q8BL65 | 26 | 11 | 61,27  | 231148 | Ablim2   | 0 | 1,40 | 2,41E-01 |
| Q8CGF6 | 13 | 11 | 105,01 | 99512  | Wdr47    | 0 | 1,14 | 8,85E-01 |
| P27601 | 38 | 12 | 350,13 | 14674  | Gna13    | 0 | 1,03 | 9,94E-01 |
| Q6ZWR6 | 3  | 23 | 12,47  | 64009  | Syne1    | 0 | 0,98 | 9,76E-01 |
| Q3ULJ0 | 30 | 11 | 102,43 | 333433 | Gpd1l    | 0 | 0,80 | 5,96E-01 |
| P37040 | 25 | 16 | 130,06 | 18984  | Por      | 0 | 0,99 | 9,91E-01 |
| Q8BG51 | 22 | 10 | 87,31  | 59040  | Rhot1    | 2 | 1,00 | 9,91E-01 |
| P46638 | 52 | 12 | 253,47 | 19326  | Rab11b   | 0 | 1,08 | 9,59E-01 |
| Q9DB73 | 39 | 10 | 83,97  | 72017  | Cyb5r1   | 0 | 1,26 | 6,21E-01 |
| Q8BR92 | 33 | 11 | 103,52 | 677884 | Palm2    | 0 | 1,13 | 9,15E-01 |
| Q6IRU5 | 38 | 11 | 240,08 | 74325  | Cltb     | 0 | 1,07 | 9,71E-01 |
| Q99LD4 | 27 | 10 | 90,01  |        | Gps1     | 0 | 1,46 | 1,12E-01 |
| Q68EF6 | 21 | 10 | 63,9   | 380785 | Begain   | 0 | 0,96 | 9,71E-01 |
| P30999 | 17 | 14 | 56,44  | 12388  | Ctnnd1   | 0 | 0,97 | 9,74E-01 |
| Q9JMA1 | 23 | 11 | 80,96  | 59025  | Usp14    | 0 | 1,19 | 7,50E-01 |
| P61028 | 42 | 3  | 346,64 | 235442 | Rab8b    | 2 | 1,30 | 4,98E-01 |
| O08756 | 28 | 5  | 73,49  |        | Hsd17b10 | 0 | 0,69 | 1,30E-01 |
| Q9QZ06 | 53 | 11 | 96,23  | 54473  | Tollip   | 0 | 0,91 | 8,85E-01 |
| Q78ZA7 | 23 | 6  | 78,21  | 17955  | Nap1l4   | 1 | 0,89 | 8,56E-01 |
| P60335 | 29 | 5  | 119,42 | 23983  | Pcbp1    | 4 | 1,05 | 9,76E-01 |
| Q61290 | 8  | 13 | 44,16  |        | Cacna1e  | 1 | 1,16 | 8,59E-01 |
| O35382 | 16 | 13 | 55,33  | 20336  | Exoc4    | 0 | 1,08 | 9,65E-01 |
| P05480 | 28 | 10 | 85,36  |        | Src      | 1 | 1,01 | 1,00E+00 |
| O54829 | 32 | 9  | 142,47 | 24012  | Rgs7     | 4 | 1,20 | 7,39E-01 |

|        |    |    |        |        |         |   |      |          |
|--------|----|----|--------|--------|---------|---|------|----------|
| Q61330 | 13 | 12 | 105,88 | 21367  | Cntn2   | 0 | 1,12 | 9,23E-01 |
| O35239 | 25 | 14 | 76,2   | 56294  | Ptpn9   | 0 | 1,02 | 1,00E+00 |
| Q08331 | 39 | 10 | 117,88 | 12308  | Calb2   | 1 | 1,15 | 8,53E-01 |
| Q61233 | 23 | 9  | 35,85  | 18826  | Lcp1    | 0 | 0,40 | 6,88E-05 |
| Q99MR8 | 21 | 11 | 52,68  | 72039  | Mccc1   | 0 | 0,80 | 5,37E-01 |
| Q61102 | 20 | 13 | 75,68  | 11306  | Abcb7   | 0 | 0,95 | 9,64E-01 |
| P51174 | 21 | 8  | 100,77 | 11363  | Acadl   | 0 | 0,89 | 8,43E-01 |
| P28656 | 15 | 5  | 78,07  | 53605  | Nap111  | 0 | 0,94 | 9,56E-01 |
| O55023 | 31 | 10 | 156,87 |        | Impa1   | 0 | 1,06 | 9,76E-01 |
| P03921 | 9  | 4  | 101,01 | 17721  | Mtnd5   | 0 | 0,92 | 9,19E-01 |
| O88685 | 27 | 9  | 71,37  | 19182  | Psmc3   | 0 | 1,08 | 9,64E-01 |
| Q9WVK4 | 19 | 5  | 127,66 | 13660  | Ehd1    | 0 | 0,85 | 7,77E-01 |
| P35278 | 39 | 4  | 243,87 | 19345  | Rab5c   | 0 | 1,23 | 6,58E-01 |
| Q9CQJ8 | 50 | 8  | 73,42  | 66218  | Ndufb9  | 0 | 0,89 | 8,40E-01 |
| Q9DBG6 | 16 | 7  | 69,79  | 20014  | Rpn2    | 0 | 0,91 | 9,01E-01 |
| P62492 | 49 | 11 | 243,23 | 53869  | Rab11a  | 0 | 1,14 | 8,70E-01 |
| P46425 | 33 | 4  | 80,44  | 14869  | Gstp2   | 0 | 0,72 | 1,44E-01 |
| P33175 | 12 | 2  | 72,78  | 16572  | Kif5a   | 0 | 1,03 | 1,00E+00 |
| Q9CZ42 | 31 | 8  | 91,51  | 69225  | Naxd    | 0 | 1,04 | 9,85E-01 |
| Q99JI6 | 44 | 3  | 94,09  | 215449 | Rap1b   | 7 | 0,99 | 9,87E-01 |
| P08228 | 47 | 6  | 194,3  | 20655  | Sod1    | 1 | 1,08 | 9,56E-01 |
| Q9CRD0 | 28 | 7  | 81,05  | 68095  | Ociad1  | 0 | 0,71 | 1,64E-01 |
| Q3UUG6 | 22 | 13 | 73,07  | 224617 | Tbc1d24 | 0 | 1,09 | 9,62E-01 |
| P58404 | 14 | 7  | 73,99  | 97387  | Strn4   | 0 | 1,01 | 1,00E+00 |
| Q9CQW1 | 57 | 10 | 98,95  | 56418  | Ykt6    | 0 | 1,32 | 4,19E-01 |
| Q9D880 | 31 | 8  | 65,76  | 66525  | Timm50  | 0 | 0,98 | 9,85E-01 |
| P00493 | 50 | 9  | 89,11  | 15452  | Hprt1   | 0 | 1,14 | 8,70E-01 |
| P50544 | 21 | 11 | 70,01  | 11370  | Acadvl  | 0 | 0,78 | 3,97E-01 |
| Q91ZR1 | 53 | 7  | 228,38 | 19342  | Rab4b   | 2 | 1,22 | 7,24E-01 |
| P16460 | 26 | 14 | 169,25 | 11898  | Ass1    | 0 | 1,25 | 6,28E-01 |
| Q8R001 | 29 | 7  | 92,46  | 212307 | Mapre2  | 0 | 0,97 | 9,76E-01 |
| Q9QUR6 | 17 | 11 | 52,78  | 19072  | Prep    | 0 | 1,03 | 9,94E-01 |
| O88952 | 52 | 5  | 136,83 | 22343  | Lin7c   | 0 | 1,43 | 1,88E-01 |
| P39447 | 12 | 18 | 19,9   | 21872  | Tjp1    | 0 | 0,98 | 9,76E-01 |
| P45376 | 33 | 11 | 108,79 | 11677  | Akr1b1  | 1 | 1,15 | 8,62E-01 |
| O54774 | 15 | 15 | 23,59  | 11776  | Ap3d1   | 0 | 1,15 | 8,82E-01 |
| Q8BNN1 | 23 | 8  | 85,85  | 78779  | Spata2l | 0 | 0,86 | 7,33E-01 |
| Q8C754 | 17 | 11 | 75,32  | 224705 | Vps52   | 0 | 1,10 | 9,34E-01 |
| Q62417 | 17 | 17 | 45,75  | 20411  | Sorbs1  | 0 | 0,89 | 8,57E-01 |
| Q9JM76 | 37 | 6  | 67,4   | 56378  | Arpc3   | 0 | 1,05 | 9,76E-01 |
| Q00612 | 30 | 15 | 72,75  | 14381  | G6pdx   | 0 | 0,93 | 9,24E-01 |
| P54285 | 30 | 7  | 83,48  | 12297  | Cacnb3  | 0 | 1,14 | 9,16E-01 |
| A2A8L5 | 8  | 6  | 118,19 | 19268  | Ptprf   | 0 | 0,80 | 5,63E-01 |
| P00920 | 44 | 9  | 73,99  | 12349  | Ca2     | 0 | 1,09 | 9,64E-01 |
| Q91YR1 | 27 | 8  | 69,7   | 19230  | Twf1    | 1 | 0,98 | 9,76E-01 |
| P63024 | 32 | 2  | 204,07 | 22319  | Vamp3   | 0 | 0,95 | 9,73E-01 |
| Q69ZK9 | 18 | 6  | 116,65 | 216856 | Nlgn2   | 1 | 1,09 | 9,64E-01 |

|        |    |    |        |        |          |   |      |          |
|--------|----|----|--------|--------|----------|---|------|----------|
| O35551 | 18 | 13 | 33,68  | 54189  | Rabep1   | 0 | 0,90 | 8,82E-01 |
| P48318 | 15 | 8  | 91,96  | 14415  | Gad1     | 0 | 0,97 | 9,74E-01 |
| Q8VD04 | 20 | 14 | 45,37  | 54645  | Gripap1  | 0 | 1,05 | 9,76E-01 |
| O70250 | 23 | 2  | 174,03 | 56012  | Pgam2    | 0 | 1,03 | 1,00E+00 |
| P97390 | 28 | 15 | 67,47  | 22365  | Vps45    | 0 | 1,11 | 9,34E-01 |
| Q9D7G0 | 30 | 4  | 106,77 | 19139  | Prps1    | 5 | 1,23 | 7,00E-01 |
| Q922R8 | 28 | 9  | 74,76  | 71853  | Pdia6    | 0 | 0,78 | 4,72E-01 |
| P62484 | 25 | 6  | 84,62  | 329165 | Abi2     | 0 | 0,87 | 8,01E-01 |
| Q9QZM0 | 16 | 5  | 75,24  | 54609  | Ubqln2   | 2 | 0,93 | 9,22E-01 |
| Q61081 | 23 | 8  | 68,34  | 12539  | Cdc37    | 0 | 0,96 | 9,67E-01 |
| Q9Z2H2 | 26 | 8  | 114,97 | 50779  | Rgs6     | 0 | 1,25 | 6,17E-01 |
| O54865 | 21 | 12 | 66,66  | 54195  | Gucy1b1  | 0 | 1,00 | 9,85E-01 |
| Q9CR95 | 37 | 8  | 123,65 | 67602  | Necap1   | 0 | 0,92 | 9,25E-01 |
| Q6GQS1 | 28 | 10 | 79,91  | 66972  | Slc25a23 | 3 | 0,83 | 6,66E-01 |
| O35678 | 32 | 8  | 89,1   | 23945  | Mgll     | 0 | 1,93 | 4,54E-04 |
| Q8CHG7 | 14 | 16 | 21,73  |        | Rapgef2  | 0 | 1,10 | 9,37E-01 |
| P62748 | 45 | 3  | 133,91 | 53602  | Hpcal1   | 0 | 1,10 | 9,48E-01 |
| Q9ERS2 | 51 | 8  | 128,97 | 67184  | Ndufa13  | 0 | 0,83 | 6,98E-01 |
| Q80U40 | 15 | 11 | 52,1   | 231760 | Rimbp2   | 0 | 1,01 | 1,00E+00 |
| Q9R0Y5 | 45 | 8  | 110,86 | 11636  | Ak1      | 0 | 1,03 | 9,79E-01 |
| Q91YJ2 | 21 | 8  | 77,42  | 69150  | Snx4     | 0 | 1,16 | 8,49E-01 |
| Q3UJU9 | 24 | 8  | 64,8   | 67809  | Rmdn3    | 0 | 0,72 | 1,88E-01 |
| Q8CBY8 | 27 | 9  | 75,4   | 67665  | Dctn4    | 0 | 1,39 | 2,85E-01 |
| Q9JIA1 | 22 | 11 | 89,13  | 56839  | Lgi1     | 0 | 1,47 | 1,55E-01 |
| Q9DCD0 | 22 | 10 | 75,6   | 110208 | Pgd      | 0 | 1,05 | 9,78E-01 |
| P47802 | 31 | 10 | 84,45  |        | Mtx1     | 0 | 0,65 | 5,16E-02 |
| O70435 | 35 | 9  | 92,03  | 19167  | Psma3    | 0 | 1,02 | 9,94E-01 |
| Q8C0T5 | 13 | 17 | 21,79  | 217692 | Sipal1l  | 0 | 1,03 | 9,87E-01 |
| Q9CX34 | 31 | 9  | 100,96 | 67955  | Sugt1    | 0 | 0,99 | 9,81E-01 |
| Q3TXS7 | 15 | 11 | 79,72  | 70247  | Psmd1    | 0 | 1,03 | 9,94E-01 |
| Q9EQP2 | 18 | 6  | 75,04  | 98878  | Ehd4     | 0 | 1,34 | 4,76E-01 |
| P62897 | 50 | 10 | 120,63 | 13063  | Cycs     | 0 | 0,93 | 9,56E-01 |
| Q8BHC1 | 46 | 7  | 184,55 | 67790  | Rab39b   | 0 | 1,08 | 9,71E-01 |
| Q8C1A5 | 19 | 11 | 62,79  | 50492  | Thop1    | 0 | 0,95 | 9,56E-01 |
| P26039 | 7  | 9  | 41,84  | 21894  | Tln1     | 0 | 0,74 | 6,42E-01 |
| P55258 | 39 | 2  | 330,66 | 17274  | Rab8a    | 0 | 3,22 | 1,26E-03 |
| Q99L13 | 34 | 9  | 93,14  | 58875  | Hibadh   | 0 | 1,06 | 9,76E-01 |
| Q6PCP5 | 35 | 8  | 69,31  | 75734  | Mff      | 0 | 0,97 | 9,74E-01 |
| P21107 | 31 | 12 | 104,27 | 59069  | Tpm3     | 0 | 1,21 | 7,10E-01 |
| Q62443 | 19 | 9  | 63,02  | 18164  | Nptx1    | 0 | 0,93 | 9,19E-01 |
| Q9R1P4 | 41 | 10 | 127,66 | 26440  | Psma1    | 0 | 1,15 | 8,53E-01 |
| Q91X97 | 33 | 3  | 121,38 | 52589  | Ncald    | 0 | 0,89 | 8,47E-01 |
| Q9JKY5 | 14 | 12 | 49,35  | 29816  | Hip1r    | 1 | 1,17 | 8,25E-01 |
| Q8R071 | 26 | 10 | 72,12  | 228550 | Itpka    | 0 | 1,09 | 9,59E-01 |
| Q9WUR9 | 46 | 10 | 61,77  | 11639  | Ak4      | 0 | 0,99 | 9,91E-01 |
| Q8K0S0 | 28 | 8  | 115,07 | 105653 | Phyhip   | 0 | 0,95 | 9,59E-01 |
| Q8VEK0 | 30 | 9  | 93,32  | 69981  | Tmem30a  | 0 | 1,05 | 9,76E-01 |

|        |    |    |        |        |          |   |      |          |
|--------|----|----|--------|--------|----------|---|------|----------|
| P12658 | 39 | 8  | 65,3   | 12307  | Calb1    | 0 | 1,31 | 4,64E-01 |
| Q8K3H0 | 18 | 9  | 49,62  | 72993  | Appl1    | 0 | 1,06 | 9,76E-01 |
| Q3UV70 | 25 | 11 | 21,62  | 381511 | Pdp1     | 0 | 0,80 | 6,17E-01 |
| P0DI97 | 23 | 8  | 67,17  | 18189  | Nrxn1    | 0 | 1,13 | 8,91E-01 |
| Q99JI4 | 27 | 11 | 88,28  | 66413  | Psmc6    | 0 | 1,36 | 3,38E-01 |
| P70297 | 21 | 9  | 57,18  | 20844  | Stam     | 0 | 1,07 | 9,74E-01 |
| Q9WUM5 | 35 | 10 | 105,58 | 56451  | Suclg1   | 0 | 1,06 | 9,74E-01 |
| O88487 | 17 | 8  | 53,91  | 13427  | Dync1i2  | 0 | 0,86 | 7,78E-01 |
| Q8BYI9 | 11 | 13 | 52,2   | 21960  | Tnr      | 0 | 1,16 | 8,57E-01 |
| Q8K386 | 38 | 5  | 296,07 |        | Rab15    | 0 | 0,97 | 9,74E-01 |
| P10630 | 28 | 2  | 112,82 | 13682  | Eif4a2   | 0 | 1,41 | 6,86E-01 |
| Q9D593 | 17 | 6  | 97,79  | 74915  | Atp6v1e2 | 0 | 1,26 | 5,86E-01 |
| Q6PHN9 | 41 | 6  | 319,63 | 77407  | Rab35    | 1 | 1,06 | 9,74E-01 |
| Q9Z1Z2 | 38 | 10 | 51,64  | 20901  | Strap    | 0 | 0,92 | 9,09E-01 |
| Q9JHR7 | 13 | 12 | 34,19  |        | Ide      | 0 | 1,18 | 7,97E-01 |
| P0C192 | 15 | 7  | 67,72  | 272381 | Lrrc4b   | 1 | 1,04 | 9,76E-01 |
| Q9CR16 | 33 | 11 | 61,05  | 67738  | Ppid     | 0 | 1,13 | 8,91E-01 |
| Q9QUI0 | 33 | 9  | 98,97  | 11848  | Rhoa     | 0 | 1,03 | 9,85E-01 |
| P62334 | 27 | 10 | 88,8   | 67089  | Psmc6    | 0 | 0,82 | 6,13E-01 |
| P35235 | 22 | 13 | 60,92  | 19247  | Ptpn11   | 0 | 1,00 | 9,94E-01 |
| O35954 | 13 | 14 | 55,53  | 18739  | Pitpm1   | 0 | 1,13 | 9,11E-01 |
| Q9Z1N9 | 6  | 12 | 72,34  | 22249  | Unc13b   | 0 | 1,26 | 5,82E-01 |
| Q99L47 | 20 | 8  | 76,64  | 70356  | St13     | 0 | 1,11 | 9,19E-01 |
| Q9WTR1 | 17 | 10 | 55,63  | 22368  | Trpv2    | 0 | 1,13 | 9,21E-01 |
| O08585 | 26 | 11 | 166,91 |        | Clta     | 0 | 1,01 | 1,00E+00 |
| Q01405 | 17 | 8  | 63,95  | 20334  | Sec23a   | 1 | 1,25 | 6,75E-01 |
| P26041 | 23 | 7  | 70,5   | 17698  | Msn      | 1 | 0,83 | 6,42E-01 |
| Q8BGT8 | 38 | 10 | 76,74  | 70911  | Phyhipl  | 4 | 0,98 | 9,85E-01 |
| P07744 | 12 | 2  | 422,95 | 16682  | Krt4     | 0 | 0,69 | 5,69E-01 |
| P52503 | 45 | 7  | 48,17  | 407785 | Ndufs6   | 0 | 0,81 | 5,69E-01 |
| Q9WV60 | 36 | 8  | 82,94  | 56637  | Gsk3b    | 3 | 1,01 | 1,00E+00 |
| Q8CJ19 | 9  | 17 | 10,98  | 194401 | Mical3   | 0 | 1,07 | 9,74E-01 |
| Q91ZZ3 | 50 | 3  | 211,73 | 104069 | Sncb     | 0 | 0,80 | 5,25E-01 |
| Q8CBW3 | 25 | 6  | 79,61  | 11308  | Abi1     | 4 | 1,11 | 9,25E-01 |
| P48774 | 42 | 9  | 120,88 | 14866  | Gstm5    | 0 | 0,86 | 7,61E-01 |
| Q9D6J5 | 46 | 6  | 74     | 67264  | Ndufb8   | 0 | 0,72 | 2,01E-01 |
| Q8C985 | 18 | 8  | 98,27  | 18191  | Nrxn3    | 0 | 1,33 | 4,06E-01 |
| O08547 | 39 | 7  | 103,62 | 20333  | Sec22b   | 0 | 0,94 | 9,56E-01 |
| Q3UHD6 | 21 | 10 | 90,45  | 76742  | Snx27    | 0 | 1,04 | 9,85E-01 |
| Q6P1B1 | 18 | 10 | 72,19  | 170750 | Xpnpep1  | 0 | 0,84 | 7,09E-01 |
| P29387 | 21 | 2  | 314,38 | 14696  | Gnb4     | 0 | 1,02 | 1,00E+00 |
| O35685 | 34 | 10 | 66,96  | 18221  | Nudc     | 0 | 0,79 | 5,23E-01 |
| P08003 | 27 | 13 | 20,39  | 12304  | Pdia4    | 0 | 0,64 | 3,07E-02 |
| O88951 | 42 | 4  | 98,84  | 22342  | Lin7b    | 0 | 1,01 | 1,00E+00 |
| Q9JKR6 | 12 | 10 | 56,82  | 12282  | Hyou1    | 0 | 0,91 | 8,85E-01 |
| P63141 | 19 | 3  | 99,21  | 16490  | Kcna2    | 1 | 0,92 | 9,56E-01 |
| Q8QZS1 | 27 | 9  | 73,65  | 227095 | Hibch    | 0 | 0,87 | 7,91E-01 |



|                 |    |    |        |                                                                                                                                                                                                                                                                                                                                                                                        |                                                                                                                                                                                    |   |      |          |
|-----------------|----|----|--------|----------------------------------------------------------------------------------------------------------------------------------------------------------------------------------------------------------------------------------------------------------------------------------------------------------------------------------------------------------------------------------------|------------------------------------------------------------------------------------------------------------------------------------------------------------------------------------|---|------|----------|
| A2CG49          | 5  | 11 | 34,61  | 545156                                                                                                                                                                                                                                                                                                                                                                                 | Kalrn                                                                                                                                                                              | 0 | 0,77 | 4,72E-01 |
| P97441          | 18 | 7  | 100,1  | 22784                                                                                                                                                                                                                                                                                                                                                                                  | Slc30a3                                                                                                                                                                            | 0 | 1,04 | 9,78E-01 |
| O55125          | 28 | 8  | 120,36 | 18082                                                                                                                                                                                                                                                                                                                                                                                  | Nipsnap1                                                                                                                                                                           | 0 | 0,81 | 6,28E-01 |
| Q69ZS6          | 11 | 8  | 119,37 | 75209                                                                                                                                                                                                                                                                                                                                                                                  | Sv2c                                                                                                                                                                               | 0 | 2,24 | 1,17E-05 |
| P0DP27          | 46 | 7  | 122,34 | 12313;<br>12314;<br>12315                                                                                                                                                                                                                                                                                                                                                              | Calm2                                                                                                                                                                              | 0 | 0,82 | 6,66E-01 |
| P13707          | 27 | 11 | 70,2   | 14555                                                                                                                                                                                                                                                                                                                                                                                  | Gpd1                                                                                                                                                                               | 0 | 0,96 | 9,71E-01 |
| P56371          | 47 | 6  | 199,13 | 19341                                                                                                                                                                                                                                                                                                                                                                                  | Rab4a                                                                                                                                                                              | 0 | 1,48 | 1,82E-01 |
| P09671          | 33 | 9  | 162,84 | 20656                                                                                                                                                                                                                                                                                                                                                                                  | Sod2                                                                                                                                                                               | 0 | 0,82 | 6,53E-01 |
| Q8K221          | 29 | 9  | 70,39  | 76932                                                                                                                                                                                                                                                                                                                                                                                  | Arfip2                                                                                                                                                                             | 0 | 1,02 | 1,00E+00 |
| P80560          | 10 | 8  | 66,75  | 19276                                                                                                                                                                                                                                                                                                                                                                                  | Ptprn2                                                                                                                                                                             | 1 | 1,08 | 9,64E-01 |
| P60843          | 27 | 2  | 81,24  | 13681                                                                                                                                                                                                                                                                                                                                                                                  | Eif4a1                                                                                                                                                                             | 6 | 0,94 | 9,45E-01 |
| Q9D8N0          | 19 | 8  | 87,75  | 67160                                                                                                                                                                                                                                                                                                                                                                                  | Eef1g                                                                                                                                                                              | 0 | 1,04 | 9,83E-01 |
| P62984          | 46 | 7  | 281,85 | 22186                                                                                                                                                                                                                                                                                                                                                                                  | Uba52                                                                                                                                                                              | 0 | 0,92 | 9,25E-01 |
| RS27A_H<br>UMAN | 38 | 7  | 281,85 | 100032<br>038;<br>100052<br>644;<br>100286<br>787;<br>100394<br>663;<br>100401<br>239;<br>100411<br>672;<br>100476<br>697;<br>100514<br>637;<br>100985<br>757;<br>101020<br>976;<br>101029<br>100;<br>101059<br>860;<br>101092<br>929;<br>101136<br>689;<br>101316<br>708;<br>101361<br>983;<br>101385<br>092;<br>101571<br>052;<br>101674<br>222;<br>101710<br>786;<br>101822<br>924; | HEL112;<br>LOC1004<br>11672;<br>LOC1013<br>61983;<br>LOC1027<br>46862;<br>LOC1028<br>16131;<br>LOC1111<br>48109;<br>LOC1165<br>66029;<br>rps27a;<br>Rps27a;<br>RPS27A;<br>rps27a.S | 0 | 0,92 | 9,25E-01 |

|  |  |  |  |                                                                                                                                                                                                                                                                                                                                                                                                                                                                                                                                                          |  |  |  |
|--|--|--|--|----------------------------------------------------------------------------------------------------------------------------------------------------------------------------------------------------------------------------------------------------------------------------------------------------------------------------------------------------------------------------------------------------------------------------------------------------------------------------------------------------------------------------------------------------------|--|--|--|
|  |  |  |  | 101864<br>869;<br>101962<br>652;<br>102142<br>514;<br>102187<br>139;<br>102420<br>450;<br>102527<br>818;<br>102746<br>286;<br>102746<br>862;<br>102816<br>131;<br>102926<br>163;<br>102976<br>798;<br>103010<br>032;<br>103088<br>763;<br>103121<br>632;<br>103220<br>242;<br>103671<br>271;<br>104856<br>443;<br>104989<br>863;<br>105294<br>656;<br>105465<br>049;<br>105521<br>178;<br>105522<br>856;<br>105536<br>598;<br>105551<br>330;<br>105576<br>398;<br>105734<br>369;<br>105814<br>769;<br>105986<br>879;<br>106976<br>779;<br>106992<br>282; |  |  |  |
|--|--|--|--|----------------------------------------------------------------------------------------------------------------------------------------------------------------------------------------------------------------------------------------------------------------------------------------------------------------------------------------------------------------------------------------------------------------------------------------------------------------------------------------------------------------------------------------------------------|--|--|--|

|                 |    |    |        |                                                                                                                                                |         |   |      |          |  |
|-----------------|----|----|--------|------------------------------------------------------------------------------------------------------------------------------------------------|---------|---|------|----------|--|
|                 |    |    |        | 108313<br>818;<br>109252<br>147;<br>109566<br>084;<br>109681<br>758;<br>286839;<br>444494;<br>454140;<br>474599;<br>548926;<br>6233;<br>718909 |         |   |      |          |  |
| P62983          | 38 | 7  | 281,85 | 78294                                                                                                                                          | Rps27a  | 0 | 0,92 | 9,25E-01 |  |
| P0CG49          | 77 | 7  | 281,85 | 22187                                                                                                                                          | Ubb     | 0 | 0,92 | 9,25E-01 |  |
| P0CG50          | 73 | 7  | 281,85 | 22190                                                                                                                                          | Ubc     | 0 | 0,92 | 9,25E-01 |  |
| Q99JB2          | 28 | 7  | 56,53  | 66592                                                                                                                                          | Stoml2  | 0 | 0,90 | 8,85E-01 |  |
| Q8C0E2          | 30 | 8  | 73,39  | 69091                                                                                                                                          | Vps26b  | 1 | 1,21 | 7,50E-01 |  |
| Q3UHD9          | 14 | 12 | 46,72  | 216439                                                                                                                                         | Agap2   | 0 | 1,04 | 9,78E-01 |  |
| Q8VCT3          | 24 | 12 | 53,96  | 215615                                                                                                                                         | Rnpep   | 0 | 0,86 | 7,50E-01 |  |
| Q9D3A9          | 11 | 4  | 98,68  | 57776                                                                                                                                          | Ttyh1   | 0 | 0,92 | 9,22E-01 |  |
| Q6PB44          | 10 | 13 | 26,3   | 104831                                                                                                                                         | Ptpn23  | 0 | 0,90 | 8,85E-01 |  |
| O35658          | 15 | 5  | 67,85  |                                                                                                                                                | C1qbp   | 0 | 0,52 | 3,45E-04 |  |
| Q7TQD2          | 33 | 7  | 159,12 | 72948                                                                                                                                          | Tppp    | 0 | 0,91 | 9,13E-01 |  |
| Q9ES28          | 19 | 13 | 45,38  | 54126                                                                                                                                          | Arhgef7 | 0 | 1,19 | 7,87E-01 |  |
| Q99KK7          | 18 | 10 | 39,82  | 75221                                                                                                                                          | Dpp3    | 0 | 1,21 | 7,28E-01 |  |
| Q9R0P3          | 24 | 6  | 52,6   | 13885                                                                                                                                          | Esd     | 0 | 0,96 | 9,74E-01 |  |
| Q9JHI5          | 21 | 10 | 79,35  | 56357                                                                                                                                          | Ivd     | 0 | 1,05 | 9,76E-01 |  |
| Q9ERI6          | 28 | 8  | 67,27  | 105014                                                                                                                                         | Rdh14   | 0 | 0,94 | 9,56E-01 |  |
| Q61503          | 16 | 8  | 82,28  | 23959                                                                                                                                          | Nt5e    | 0 | 0,90 | 8,54E-01 |  |
| A2ARS0          | 30 | 9  | 84,95  | 383787                                                                                                                                         | Ankrd63 | 0 | 1,17 | 7,77E-01 |  |
| A2AGT5          | 8  | 14 | 30,44  | 75786                                                                                                                                          | Ckap5   | 0 | 1,15 | 9,09E-01 |  |
| Q9CQD1          | 34 | 4  | 206,84 | 271457                                                                                                                                         | Rab5a   | 0 | 1,16 | 8,33E-01 |  |
| Q9D855          | 49 | 6  | 71,53  |                                                                                                                                                | Uqcrb   | 0 | 0,93 | 9,28E-01 |  |
| Q9ERK4          | 13 | 13 | 52,21  | 110750                                                                                                                                         | Cse1l   | 0 | 1,08 | 9,61E-01 |  |
| Q7TMY8          | 4  | 14 | 11,95  | 59026                                                                                                                                          | Huwe1   | 0 | 1,39 | 4,83E-01 |  |
| GSTP1_H<br>UMAN | 40 | 5  | 35,07  |                                                                                                                                                |         | 0 | 1,41 | 7,44E-01 |  |
| Q8R127          | 21 | 10 | 91,67  | 109232                                                                                                                                         | Sccpdh  | 0 | 1,00 | 9,98E-01 |  |
| Q8R464          | 27 | 7  | 73,96  | 260299                                                                                                                                         | Cadm4   | 0 | 1,01 | 9,96E-01 |  |
| Q9CQC7          | 54 | 7  | 126,68 | 100042<br>503;<br>68194                                                                                                                        | Ndufb4  | 0 | 1,15 | 8,43E-01 |  |
| Q9D7X3          | 23 | 3  | 88,39  | 72349                                                                                                                                          | Dusp3   | 0 | 0,79 | 4,49E-01 |  |
| Q9WV18          | 13 | 12 | 49,73  | 54393                                                                                                                                          | Gabbr1  | 0 | 1,03 | 9,99E-01 |  |
| Q9Z1J3          | 23 | 11 | 61,51  | 18041                                                                                                                                          | Nfs1    | 0 | 1,19 | 7,46E-01 |  |
| Q80U56          | 19 | 11 | 65,39  | 78937                                                                                                                                          | Avl9    | 0 | 1,09 | 9,56E-01 |  |
| Q8VEH3          | 38 | 4  | 131,79 | 68724                                                                                                                                          | Arl8a   | 0 | 1,25 | 6,47E-01 |  |
| Q9Z0S1          | 35 | 10 | 107,19 | 23827                                                                                                                                          | Bpnt1   | 0 | 1,10 | 9,24E-01 |  |

|            |    |    |        |                                                                                                                                                                                                                                                                                                                |                            |   |      |          |
|------------|----|----|--------|----------------------------------------------------------------------------------------------------------------------------------------------------------------------------------------------------------------------------------------------------------------------------------------------------------------|----------------------------|---|------|----------|
| O08528     | 4  | 3  | 257,54 | 15277                                                                                                                                                                                                                                                                                                          | Hk2                        | 0 | 0,95 | 9,74E-01 |
| Q9QUM9     | 31 | 7  | 101,96 | 26443                                                                                                                                                                                                                                                                                                          | Psma6                      | 0 | 1,09 | 9,50E-01 |
| P39688     | 26 | 7  | 118,86 | 14360                                                                                                                                                                                                                                                                                                          | Fyn                        | 7 | 0,94 | 9,64E-01 |
| Q9WTS4     | 6  | 13 | 23,16  | 23963                                                                                                                                                                                                                                                                                                          | Tenm1                      | 0 | 1,04 | 9,85E-01 |
| Q91VI7     | 29 | 10 | 73,88  | 107702                                                                                                                                                                                                                                                                                                         | Rnh1                       | 0 | 1,15 | 8,57E-01 |
| Q8BGX2     | 26 | 6  | 63,9   | 69773                                                                                                                                                                                                                                                                                                          | Timm29                     | 0 | 0,79 | 4,82E-01 |
| P62962     | 72 | 9  | 60,63  | 18643                                                                                                                                                                                                                                                                                                          | Pfn1                       | 0 | 0,87 | 7,77E-01 |
| P60202     | 26 | 7  | 196,48 | 18823                                                                                                                                                                                                                                                                                                          | Plp1                       | 0 | 0,86 | 7,90E-01 |
| Q8BKC5     | 13 | 12 | 45,46  | 70572                                                                                                                                                                                                                                                                                                          | Ipo5                       | 0 | 0,96 | 9,72E-01 |
| Q641P0     | 28 | 8  | 68,86  | 242894                                                                                                                                                                                                                                                                                                         | Actr3b                     | 0 | 0,93 | 9,32E-01 |
| Q99LI8     | 16 | 10 | 68,58  | 15239                                                                                                                                                                                                                                                                                                          | Hgs                        | 0 | 1,14 | 8,91E-01 |
| Q9DBS2     | 32 | 7  | 85,37  | 67808                                                                                                                                                                                                                                                                                                          | Tprg11                     | 0 | 1,04 | 9,81E-01 |
| Q63912     | 14 | 7  | 177,29 | 18377                                                                                                                                                                                                                                                                                                          | Omg                        | 0 | 0,82 | 6,61E-01 |
| Q9ERG2     | 16 | 9  | 40,99  | 94186                                                                                                                                                                                                                                                                                                          | Strn3                      | 0 | 0,99 | 9,94E-01 |
| Q99MI1     | 11 | 5  | 104,27 | 111173                                                                                                                                                                                                                                                                                                         | Erc1                       | 0 | 1,04 | 9,79E-01 |
| P62835     | 44 | 2  | 91,35  | 109905                                                                                                                                                                                                                                                                                                         | Rap1a                      | 0 | 0,76 | 7,46E-01 |
| P35762     | 21 | 3  | 55,28  | 12520                                                                                                                                                                                                                                                                                                          | Cd81                       | 0 | 1,07 | 9,74E-01 |
| Q3UGY8     | 7  | 12 | 27,08  | 215821                                                                                                                                                                                                                                                                                                         | Arfgef3                    | 0 | 1,03 | 9,94E-01 |
| Q9ESN9     | 9  | 11 | 55,06  | 30957                                                                                                                                                                                                                                                                                                          | Mapk8ip3                   | 0 | 1,19 | 7,89E-01 |
| Q60631     | 41 | 10 | 87,78  | 14784                                                                                                                                                                                                                                                                                                          | Grb2                       | 0 | 0,98 | 9,76E-01 |
| RASH_HUMAN | 39 | 2  | 119,8  | 100406<br>017;<br>100773<br>737;<br>101002<br>992;<br>101047<br>663;<br>101838<br>968;<br>101959<br>985;<br>102118<br>744;<br>102905<br>357;<br>103246<br>363;<br>103250<br>130;<br>104873<br>574;<br>105494<br>134;<br>105503<br>192;<br>105549<br>333;<br>105577<br>198;<br>105998<br>617;<br>108288<br>791; | c-Ha-ras;<br>Hras;<br>HRAS | 5 | 1,12 | 9,08E-01 |

|        |    |    |        |                                                                   |         |   |      |          |
|--------|----|----|--------|-------------------------------------------------------------------|---------|---|------|----------|
|        |    |    |        | 108543<br>525;<br>15461;<br>293621;<br>3265;<br>466302;<br>698830 |         |   |      |          |
| Q8BH04 | 20 | 10 | 52,72  | 74551                                                             | Pck2    | 0 | 1,17 | 8,25E-01 |
| P39087 | 13 | 8  | 64,12  |                                                                   | Grik2   | 0 | 0,96 | 9,74E-01 |
| Q80VP0 | 13 | 11 | 51,74  | 70381                                                             | Tecpr1  | 0 | 1,00 | 9,85E-01 |
| Q9CQH3 | 33 | 8  | 86,09  | 66046                                                             | Ndufb5  | 0 | 0,83 | 6,25E-01 |
| Q04690 | 7  | 18 | 12,18  | 18015                                                             | Nf1     | 0 | 1,16 | 8,43E-01 |
| Q920N7 | 23 | 9  | 64,07  | 171180                                                            | Syt12   | 0 | 1,14 | 8,85E-01 |
| P58389 | 31 | 10 | 114,95 | 110854                                                            | Ptpa    | 0 | 1,12 | 9,02E-01 |
| Q93092 | 34 | 11 | 106,91 | 21351                                                             | Taldo1  | 0 | 0,86 | 7,97E-01 |
| Q6P8X1 | 27 | 12 | 57,98  | 72183                                                             | Snx6    | 0 | 1,02 | 9,94E-01 |
| Q62442 | 55 | 3  | 68,34  | 22317                                                             | Vamp1   | 0 | 1,06 | 9,76E-01 |
| Q6PGF7 | 14 | 11 | 41,81  | 102058                                                            | Exoc8   | 0 | 1,19 | 7,91E-01 |
| P63080 | 19 | 5  | 71,12  | 14402                                                             | Gabrb3  | 3 | 1,02 | 1,00E+00 |
| Q5U458 | 21 | 11 | 85,18  | 230935                                                            | Dnaje11 | 0 | 0,82 | 6,06E-01 |
| P49443 | 24 | 6  | 68,71  | 19042                                                             | Ppm1a   | 3 | 1,14 | 8,81E-01 |
| Q8CI71 | 12 | 9  | 67,18  | 73288                                                             | Vps50   | 0 | 0,94 | 9,41E-01 |
| Q8R2R9 | 31 | 8  | 47,82  | 64933                                                             | Ap3m2   | 2 | 1,28 | 5,69E-01 |
| Q2NL51 | 23 | 5  | 81,49  | 606496                                                            | Gsk3a   | 0 | 0,83 | 6,94E-01 |
| P20108 | 32 | 8  | 139,99 | 11757                                                             | Prdx3   | 0 | 1,23 | 6,72E-01 |
| P62482 | 22 | 9  | 73,83  | 16498                                                             | Kcnab2  | 2 | 1,34 | 3,31E-01 |
| Q8C3Q5 | 19 | 8  | 32,41  | 232813                                                            | Shisa7  | 0 | 0,93 | 9,34E-01 |
| O70439 | 31 | 7  | 128,24 |                                                                   | Stx7    | 0 | 0,88 | 8,07E-01 |
| Q99J85 | 18 | 8  | 96,67  |                                                                   | Nptxr   | 0 | 1,08 | 9,56E-01 |
| Q6VNB8 | 5  | 16 | 17,88  | 72145                                                             | Wdfy3   | 0 | 1,39 | 2,43E-01 |
| Q9JLF6 | 13 | 11 | 113,33 | 21816                                                             | Tgm1    | 0 | 1,53 | 7,32E-02 |
| Q7M6Y3 | 17 | 7  | 127,32 | 233489                                                            | Picalm  | 0 | 0,98 | 9,76E-01 |
| Q8C996 | 24 | 6  | 44,85  | 72160                                                             | Tmem163 | 0 | 0,95 | 9,64E-01 |
| Q9DC07 | 35 | 9  | 94,32  | 74103                                                             | Nebi    | 0 | 1,06 | 9,76E-01 |
| Q80T41 | 12 | 9  | 87,88  | 242425                                                            | Gabbr2  | 0 | 1,06 | 9,76E-01 |
| Q91V09 | 20 | 9  | 57,65  | 73447                                                             | Wdr13   | 0 | 1,10 | 9,34E-01 |
| Q9D8W5 | 20 | 9  | 68,72  | 66997                                                             | Psmc12  | 0 | 1,28 | 5,85E-01 |
| Q9WTS5 | 5  | 12 | 18,11  |                                                                   | Tenm2   | 0 | 1,13 | 9,42E-01 |
| Q9EPL8 | 10 | 9  | 38,88  | 233726                                                            | Ipo7    | 0 | 0,85 | 7,09E-01 |
| Q9D5V5 | 13 | 11 | 55,36  | 75717                                                             | Cul5    | 0 | 0,89 | 8,25E-01 |
| P16388 | 23 | 5  | 85,3   | 16485                                                             | Kcna1   | 5 | 0,99 | 9,87E-01 |
| O35465 | 18 | 6  | 47,53  | 14232                                                             | Fkbp8   | 0 | 0,74 | 3,59E-01 |
| O70172 | 22 | 5  | 67,77  | 18718                                                             | Pip4k2a | 3 | 1,01 | 1,00E+00 |
| Q68FM6 | 12 | 8  | 55,6   | 207393                                                            | Elfn2   | 0 | 1,04 | 9,91E-01 |
| Q9DC53 | 15 | 8  | 101,66 | 66871                                                             | Cpne8   | 0 | 0,91 | 9,03E-01 |
| P35282 | 38 | 7  | 111,87 | 216344                                                            | Rab21   | 0 | 1,65 | 2,89E-02 |
| Q505F5 | 19 | 8  | 43,76  | 72946                                                             | Lrrc47  | 0 | 1,21 | 7,33E-01 |
| P54775 | 28 | 11 | 61,84  | 23996                                                             | Psmc4   | 0 | 1,08 | 9,64E-01 |

|            |    |    |        |        |          |   |      |          |
|------------|----|----|--------|--------|----------|---|------|----------|
| Q80ZF8     | 10 | 10 | 32,17  | 210933 | Adgrb3   | 1 | 0,96 | 9,71E-01 |
| P45591     | 55 | 6  | 94,51  | 12632  | Cfl2     | 0 | 0,99 | 9,85E-01 |
| O54988     | 12 | 13 | 12,49  | 20874  | Slk      | 0 | 1,08 | 9,69E-01 |
| O35621     | 39 | 9  | 72,94  | 29858  | Pmm1     | 0 | 1,41 | 2,56E-01 |
| Q61768     | 11 | 3  | 70,23  | 16573  | Kif5b    | 0 | 2,09 | 1,01E-01 |
| Q8C437     | 20 | 9  | 46,82  | 58869  | Pex5l    | 0 | 1,07 | 9,74E-01 |
| Q5DTY9     | 22 | 9  | 82,11  | 383348 | Kctd16   | 0 | 1,15 | 8,25E-01 |
| Q64518     | 8  | 7  | 115,13 | 53313  | Atp2a3   | 0 | 0,62 | 9,98E-03 |
| Q62421     | 31 | 10 | 79,97  | 20408  | Sh3gl3   | 0 | 0,85 | 7,49E-01 |
| Q6P5U7     | 7  | 11 | 44,58  | 319807 | Nwd2     | 0 | 1,43 | 1,91E-01 |
| P08414     | 17 | 7  | 71,4   |        | Camk4    | 0 | 0,95 | 9,56E-01 |
| Q5SVL6     | 19 | 9  | 64,74  | 380711 | Rap1gap2 | 0 | 1,02 | 1,00E+00 |
| Q8CDN6     | 34 | 7  | 57,74  | 53382  | Txn1l    | 0 | 1,07 | 9,74E-01 |
| K1H8_HUMAN | 18 | 4  | 386,58 |        |          | 0 | 1,56 | 6,23E-02 |
| Q91VZ6     | 15 | 5  | 79     | 98366  | Smap1    | 0 | 1,08 | 9,67E-01 |
| Q9ESJ4     | 19 | 12 | 44,48  | 80987  | Nckipsd  | 0 | 1,08 | 9,56E-01 |
| Q9D0I9     | 20 | 12 | 30,93  | 104458 | Rars1    | 0 | 0,88 | 8,42E-01 |
| Q8BPQ7     | 11 | 9  | 72,11  | 52850  | Sgsm1    | 0 | 1,24 | 6,70E-01 |
| P42669     | 26 | 6  | 107,39 | 19290  | Pura     | 0 | 1,17 | 7,90E-01 |
| Q921H8     | 25 | 7  | 35,56  | 113868 | Acaa1a   | 0 | 0,99 | 9,85E-01 |
| Q2PFD7     | 10 | 9  | 39,85  | 234353 | Psd3     | 0 | 1,12 | 9,07E-01 |
| Q8CGU1     | 15 | 9  | 42,44  | 67488  | Calcoco1 | 0 | 1,08 | 9,74E-01 |
| Q8BFT9     | 14 | 6  | 84,86  | 68666  | Svop     | 0 | 0,92 | 9,12E-01 |
| P62746     | 26 | 7  | 66,61  | 11852  | Rhob     | 0 | 0,90 | 9,02E-01 |
| Q9D4H8     | 13 | 10 | 64,16  | 71745  | Cul2     | 0 | 0,99 | 9,85E-01 |
| Q9CXW3     | 44 | 8  | 52,09  | 12301  | Cacybp   | 0 | 1,13 | 9,02E-01 |
| P13020     | 14 | 5  | 57,21  | 227753 | Gsn      | 6 | 1,16 | 8,42E-01 |
| Q61187     | 28 | 9  | 79,99  | 22088  | Tsg101   | 0 | 0,90 | 8,42E-01 |
| O88545     | 31 | 8  | 69,48  | 26893  | Cops6    | 0 | 1,26 | 5,66E-01 |
| P31254     | 7  | 8  | 130,34 |        | Uba1y    | 0 | 1,38 | 2,59E-01 |
| Q61206     | 26 | 6  | 46,73  | 18475  | Pafah1b2 | 0 | 1,10 | 9,36E-01 |
| O09111     | 49 | 6  | 74,55  | 104130 | Ndufb11  | 0 | 0,79 | 5,27E-01 |
| Q8CHP8     | 26 | 7  | 90,09  | 67078  | Pgp      | 0 | 1,07 | 9,76E-01 |
| O35435     | 28 | 9  | 32,36  | 56749  | Dhodh    | 0 | 0,65 | 2,06E-01 |
| Q8CFI0     | 14 | 10 | 50,67  |        | Nedd4l   | 1 | 0,84 | 6,53E-01 |
| K1H5_HUMAN | 16 | 3  | 371,18 |        |          | 0 | 0,72 | 1,81E-01 |
| Q9QWY8     | 11 | 10 | 23,73  | 13196  | Asap1    | 1 | 1,08 | 9,62E-01 |
| P62196     | 27 | 9  | 35,24  | 19184  | Psmc5    | 1 | 0,98 | 9,76E-01 |
| Q9JJK1     | 31 | 8  | 38,91  | 58244  | Stx6     | 0 | 0,90 | 8,59E-01 |
| Q8R191     | 28 | 6  | 229,3  | 20974  | Syngr3   | 0 | 1,33 | 4,00E-01 |
| Q61990     | 21 | 3  | 55,95  | 18521  | Pcbp2    | 0 | 1,20 | 8,42E-01 |
| Q05512     | 16 | 7  | 38,69  | 13728  | Mark2    | 2 | 1,16 | 8,47E-01 |
| Q8BHZ0     | 21 | 4  | 75,32  | 76820  | Cyria    | 0 | 1,13 | 9,34E-01 |
| Q9CZP5     | 21 | 7  | 68,36  | 66821  | Bcs1l    | 0 | 0,78 | 4,95E-01 |
| Q3UHC7     | 10 | 9  | 50,61  | 69601  | Dab2ip   | 0 | 0,96 | 9,74E-01 |
| Q9QVP9     | 11 | 9  | 39,49  | 19229  | Ptk2b    | 1 | 0,99 | 9,78E-01 |

|                |    |    |        |        |          |   |      |          |
|----------------|----|----|--------|--------|----------|---|------|----------|
| O70325         | 39 | 8  | 49,42  | 625249 | Gpx4     | 0 | 0,94 | 9,39E-01 |
| Q62393         | 28 | 6  | 62,76  | 21985  | Tpd52    | 0 | 1,18 | 7,77E-01 |
| Q99L43         | 12 | 4  | 90,38  | 110911 | Cds2     | 0 | 0,93 | 9,24E-01 |
| P29758         | 23 | 9  | 47,76  | 18242  | Oat      | 0 | 0,66 | 4,67E-02 |
| Q924N4         | 8  | 5  | 168,08 | 107723 | Slc12a6  | 0 | 0,78 | 4,48E-01 |
| P46664         | 24 | 8  | 56,81  | 11566  | Adss2    | 0 | 0,94 | 9,56E-01 |
| Q8CCB4         | 17 | 12 | 21,85  | 68299  | Vps53    | 0 | 0,74 | 2,77E-01 |
| Q9R1V7         | 10 | 7  | 66,34  | 23792  | Adam23   | 0 | 1,05 | 9,76E-01 |
| P47753         | 35 | 5  | 81,72  |        | Capza1   | 0 | 2,19 | 1,02E-03 |
| Q3B7Z2         | 16 | 8  | 37,66  | 76303  | Osbp     | 0 | 1,47 | 2,60E-01 |
| LYSC_CH<br>ICK | 44 | 6  | 38,99  | 396218 | LYZ      | 0 | 1,10 | 9,74E-01 |
| O88696         | 35 | 7  | 56,38  | 53895  | Clpp     | 0 | 0,97 | 9,76E-01 |
| Q9EP89         | 20 | 11 | 56,5   | 80907  | Lactb    | 0 | 0,76 | 4,00E-01 |
| Q80UJ7         | 13 | 11 | 34,3   | 226407 | Rab3gap1 | 0 | 0,84 | 7,13E-01 |
| Q7TQ95         | 34 | 9  | 42,49  | 69605  | Ln timer | 0 | 1,17 | 8,37E-01 |
| Q8BIW1         | 20 | 7  | 44,37  | 229589 | Prune1   | 0 | 1,30 | 5,87E-01 |
| Q8CBE3         | 17 | 9  | 47,36  | 207615 | Wdr37    | 0 | 1,52 | 7,23E-02 |
| Q9WVE8         | 18 | 9  | 71,58  | 23970  | Pacsin2  | 0 | 0,89 | 8,50E-01 |
| Q9Z1Q2         | 19 | 8  | 55,94  | 193742 | Abhd16a  | 0 | 1,02 | 1,00E+00 |
| Q91VM9         | 22 | 7  | 57,02  | 74776  | Ppa2     | 0 | 0,97 | 9,76E-01 |
| Q99KB8         | 24 | 6  | 50,7   | 14651  | Hagh     | 0 | 1,40 | 2,39E-01 |
| Q61390         | 11 | 5  | 71,44  | 12467  | Cct6b    | 0 | 1,45 | 1,66E-01 |
| Q8CDG3         | 12 | 11 | 39,68  | 70675  | Vcpip1   | 0 | 1,22 | 7,41E-01 |
| Q9D0M5         | 40 | 4  | 75,69  | 68097  | Dynll2   | 3 | 1,03 | 9,94E-01 |
| P26638         | 19 | 8  | 33,03  | 20226  | Sars1    | 0 | 0,88 | 8,89E-01 |
| Q60854         | 20 | 8  | 66,16  | 20719  | Serpinb6 | 0 | 1,32 | 4,29E-01 |
| Q8K2K6         | 16 | 6  | 62,73  | 15463  | Agfg1    | 0 | 1,29 | 5,52E-01 |
| Q9WVJ2         | 32 | 11 | 47,26  | 23997  | Psmc13   | 0 | 1,21 | 6,94E-01 |
| P49442         | 22 | 7  | 44,85  | 16329  | Inpp1    | 0 | 0,91 | 9,05E-01 |
| Q99MN9         | 17 | 7  | 52,77  | 66904  | Pccb     | 0 | 0,76 | 5,67E-01 |
| Q9R1R2         | 13 | 8  | 53,27  | 55992  | Trim3    | 0 | 0,95 | 9,70E-01 |
| P24270         | 21 | 6  | 41,39  | 12359  | Cat      | 0 | 0,97 | 9,81E-01 |
| Q9D1K2         | 43 | 6  | 34,81  | 66144  | Atp6v1f  | 0 | 1,40 | 2,37E-01 |
| Q5DU25         | 9  | 8  | 40,89  | 245666 | Iqsec2   | 0 | 1,30 | 7,80E-01 |
| Q9DBP5         | 42 | 8  | 75,93  | 66588  | Cmpk1    | 0 | 0,94 | 9,49E-01 |
| O88384         | 38 | 8  | 56,07  |        | Vti1b    | 0 | 0,84 | 6,74E-01 |
| Q8VBZ3         | 21 | 9  | 30,02  | 56457  | Clptm1   | 0 | 1,04 | 9,87E-01 |
| Q9EPK7         | 10 | 10 | 42,37  | 65246  | Xpo7     | 0 | 1,06 | 9,74E-01 |
| P52196         | 26 | 6  | 52,76  | 22117  | Tst      | 0 | 0,80 | 4,98E-01 |
| Q9QYA2         | 17 | 5  | 30,63  | 53333  | Tomm40   | 0 | 0,88 | 8,10E-01 |
| Q9CQW2         | 35 | 5  | 121,3  | 67166  | Arl8b    | 4 | 0,98 | 9,76E-01 |
| Q9CR51         | 24 | 3  | 50,48  | 66290  | Atp6v1g1 | 0 | 1,45 | 1,88E-01 |
| P70208         | 4  | 2  | 48,79  | 18846  | Plxna3   | 0 | 1,38 | 7,09E-01 |
| Q8C0M9         | 27 | 8  | 74,02  | 66514  | Asrgl1   | 0 | 1,16 | 8,33E-01 |
| Q99JY8         | 22 | 8  | 97,1   | 67916  | Plpp3    | 0 | 0,84 | 7,39E-01 |
| Q1RLL3         | 13 | 7  | 66,58  | 211232 | Cpne9    | 0 | 0,89 | 8,10E-01 |

|        |    |    |        |        |          |   |      |          |
|--------|----|----|--------|--------|----------|---|------|----------|
| Q9D4C9 | 26 | 6  | 74,49  | 74438  | Clvs1    | 2 | 1,17 | 8,25E-01 |
| Q9Z0V2 | 15 | 7  | 35,74  | 16508  | Kend2    | 0 | 0,86 | 7,77E-01 |
| Q8K2C9 | 17 | 7  | 74,54  | 57874  | Hacd3    | 0 | 0,95 | 9,56E-01 |
| Q91VE0 | 17 | 9  | 45,44  | 26569  | Slc27a4  | 1 | 0,82 | 6,42E-01 |
| Q9CZD3 | 15 | 10 | 35,12  | 353172 | Gars1    | 0 | 1,04 | 9,77E-01 |
| Q9CTY5 | 17 | 8  | 37,79  | 78506  | Micu3    | 0 | 0,81 | 5,84E-01 |
| Q50H33 | 17 | 5  | 61,49  | 243043 | Kctd8    | 0 | 0,83 | 8,43E-01 |
| P62071 | 32 | 4  | 54,06  | 66922  | Rras2    | 2 | 1,13 | 8,91E-01 |
| Q9JK48 | 26 | 8  | 61,26  | 54673  | Sh3glb1  | 0 | 1,16 | 8,45E-01 |
| Q9QYF9 | 23 | 6  | 75,22  | 29812  | Ndr3     | 0 | 0,86 | 7,23E-01 |
| Q9WTX6 | 17 | 13 | 28,88  | 26965  | Cul1     | 0 | 0,96 | 9,70E-01 |
| Q9D898 | 45 | 6  | 80,53  | 74192  | Arpc5l   | 0 | 0,92 | 9,22E-01 |
| Q8BK64 | 31 | 10 | 36,3   | 217737 | Ahsa1    | 0 | 1,23 | 6,63E-01 |
| Q3TDD9 | 15 | 8  | 15,93  | 73825  | Ppp1r21  | 0 | 1,08 | 9,74E-01 |
| Q3THS6 | 17 | 7  | 41,1   | 232087 | Mat2a    | 0 | 1,21 | 8,01E-01 |
| Q3ULD5 | 15 | 7  | 57,42  | 78038  | Mccc2    | 0 | 0,71 | 2,72E-01 |
| Q61885 | 33 | 8  | 81,72  | 17441  | Mog      | 0 | 0,84 | 7,18E-01 |
| Q8BGU5 | 28 | 8  | 41,72  | 67974  | Ccny     | 0 | 1,04 | 9,79E-01 |
| P19536 | 36 | 6  | 86,69  |        | Cox5b    | 0 | 1,07 | 9,74E-01 |
| P35293 | 36 | 7  | 103,47 | 19330  | Rab18    | 0 | 1,10 | 9,40E-01 |
| P61089 | 46 | 8  | 70,17  | 93765  | Ube2n    | 0 | 0,95 | 9,74E-01 |
| Q61151 | 21 | 6  | 59,45  | 26932  | Ppp2r5e  | 2 | 1,09 | 9,56E-01 |
| Q8CC88 | 8  | 13 | 5,74   | 219189 | Vwa8     | 0 | 0,88 | 8,86E-01 |
| Q9DCL9 | 21 | 10 | 55,8   | 67054  | Paics    | 0 | 0,99 | 9,77E-01 |
| P59016 | 20 | 11 | 22,64  | 233405 | Vps33b   | 0 | 0,93 | 9,34E-01 |
| Q9D517 | 23 | 10 | 69,52  | 28169  | Agpat3   | 0 | 1,01 | 1,00E+00 |
| Q9Z127 | 10 | 6  | 87,49  | 20539  | Slc7a5   | 0 | 1,00 | 9,91E-01 |
| Q9QZQ1 | 8  | 12 | 13,69  | 17356  | Afdn     | 0 | 0,98 | 9,85E-01 |
| P47740 | 18 | 7  | 27,68  | 11671  | Aldh3a2  | 0 | 0,97 | 9,76E-01 |
| P45952 | 19 | 8  | 81,11  | 11364  | Acadm    | 0 | 0,82 | 6,07E-01 |
| Q9QXX4 | 12 | 3  | 138,55 | 50799  | Slc25a13 | 0 | 0,63 | 4,61E-01 |
| Q80UU9 | 38 | 5  | 42     | 70804  | Pgrmc2   | 0 | 1,10 | 9,48E-01 |
| Q80ZJ1 | 40 | 4  | 83,15  | 76108  | Rap2a    | 0 | 1,06 | 9,74E-01 |
| Q8C166 | 15 | 8  | 63,27  | 266692 | Cpne1    | 1 | 1,00 | 9,87E-01 |
| P58771 | 23 | 8  | 65,2   | 22003  | Tpm1     | 0 | 1,33 | 4,00E-01 |
| Q3V1U8 | 19 | 4  | 53,68  | 270162 | Elmod1   | 0 | 0,84 | 8,25E-01 |
| Q8BLR2 | 16 | 7  | 56,07  | 74020  | Cpne4    | 0 | 1,28 | 6,58E-01 |
| Q7TNP2 | 10 | 5  | 62,1   | 73699  | Ppp2r1b  | 0 | 0,79 | 4,06E-01 |
| Q9Z1W9 | 12 | 5  | 25,39  | 53416  | Stk39    | 1 | 1,31 | 4,72E-01 |
| P35546 | 12 | 12 | 13,62  | 19713  | Ret      | 0 | 2,35 | 1,04E-04 |
| P03911 | 11 | 5  | 95,15  | 17719  | Mtnd4    | 0 | 0,81 | 6,15E-01 |
| O09061 | 28 | 6  | 49,9   | 19170  | Psmb1    | 0 | 1,13 | 9,05E-01 |
| P12849 | 17 | 4  | 51,22  | 19085  | Prkar1b  | 0 | 0,99 | 9,91E-01 |
| Q9QYJ0 | 30 | 11 | 56,46  | 56445  | Dnaja2   | 0 | 1,20 | 7,86E-01 |
| Q3UTJ2 | 13 | 11 | 26,63  | 234214 | Sorbs2   | 0 | 1,04 | 9,79E-01 |
| P08226 | 32 | 9  | 51,32  | 11816  | Apoe     | 0 | 0,92 | 9,18E-01 |
| Q9Z1R2 | 9  | 7  | 41,71  | 224727 | Bag6     | 0 | 1,21 | 7,89E-01 |



|                |    |    |        |        |                |   |      |          |
|----------------|----|----|--------|--------|----------------|---|------|----------|
| Q9CPQ8         | 33 | 2  | 20,99  | 27425  | Atp5mg         | 0 | 0,87 | 8,10E-01 |
| O35864         | 24 | 7  | 76,02  | 26754  | Cops5          | 0 | 1,12 | 9,16E-01 |
| Q8BTG7         | 26 | 7  | 52,31  | 234593 | NdrG4          | 0 | 0,91 | 8,97E-01 |
| Q9CZR3         | 16 | 5  | 72,76  | 641376 | Tomm40l        | 0 | 0,65 | 4,79E-02 |
| Q9EST1         | 11 | 7  | 70     | 57911  | Gsdma          | 0 | 0,96 | 9,71E-01 |
| P21271         | 3  | 7  | 137,74 |        | Myo5b          | 0 | 1,23 | 7,02E-01 |
| Q9CQS4         | 24 | 7  | 64,22  | 67453  | Slc25a46       | 0 | 0,81 | 5,77E-01 |
| Q9R1P3         | 34 | 6  | 55,69  | 26445  | Psmb2          | 0 | 1,43 | 2,18E-01 |
| O35639         | 35 | 9  | 27,17  | 11745  | Anxa3          | 1 | 0,39 | 1,45E-07 |
| Q8K3J1         | 37 | 8  | 72,25  | 225887 | Ndufs8         | 0 | 0,78 | 4,83E-01 |
| Q9JMH9         | 6  | 10 | 13,68  | 360013 | Myo18a         | 0 | 0,90 | 8,91E-01 |
| Q9EPR5         | 10 | 12 | 31,55  | 81840  | Sorcs2         | 0 | 0,86 | 7,61E-01 |
| Q71M36         | 17 | 7  | 76,7   | 29873  | Cspg5          | 0 | 1,09 | 9,44E-01 |
| Q80U23         | 25 | 10 | 26,62  | 241727 | Snph           | 0 | 0,99 | 9,76E-01 |
| P12023         | 17 | 9  | 25,73  | 11820  | App            | 1 | 1,01 | 9,97E-01 |
| TRFL_HU<br>MAN | 15 | 10 | 18,58  | 4057   | HEL110;<br>LTF | 0 | 3,30 | 2,00E-13 |
| B1AZP2         | 12 | 8  | 35,66  | 228836 | Dlgap4         | 0 | 1,06 | 9,76E-01 |
| Q7TNC9         | 23 | 10 | 29,37  | 212111 | Inpp5a         | 0 | 1,14 | 8,70E-01 |
| Q80YA9         | 11 | 8  | 34,43  | 245684 | Cnksr2         | 0 | 1,29 | 6,61E-01 |
| Q9DC70         | 18 | 5  | 80,33  | 75406  | Ndufs7         | 0 | 1,10 | 9,39E-01 |
| P40336         | 23 | 5  | 53,74  | 30930  | Vps26a         | 0 | 1,15 | 8,78E-01 |
| Q80TL0         | 9  | 5  | 42,21  | 320472 | Ppm1e          | 0 | 0,96 | 9,74E-01 |
| P56695         | 12 | 8  | 29,52  | 22393  | Wfs1           | 0 | 0,98 | 9,78E-01 |
| Q0VE82         | 19 | 9  | 49,19  | 102278 | Cpne7          | 0 | 1,72 | 1,07E-02 |
| O89112         | 15 | 6  | 89,56  | 14768  | Lancl1         | 0 | 0,90 | 8,93E-01 |
| Q99P58         | 43 | 8  | 55,43  | 80718  | Rab27b         | 0 | 1,11 | 9,34E-01 |
| Q922B2         | 20 | 9  | 34,46  | 226414 | Dars1          | 0 | 0,82 | 6,33E-01 |
| Q920M7         | 26 | 10 | 34,98  | 110058 | Syt17          | 0 | 2,06 | 6,37E-04 |
| Q62425         | 48 | 6  | 101,79 | 17992  | Ndufa4         | 0 | 0,73 | 2,39E-01 |
| Q811P8         | 6  | 10 | 26,58  | 330914 | Arhgap32       | 1 | 1,13 | 9,09E-01 |
| Q8BHF7         | 16 | 7  | 40,36  | 74451  | Pgs1           | 0 | 0,96 | 9,64E-01 |
| Q6P5F7         | 15 | 7  | 54,68  | 78339  | Ttyh3          | 0 | 0,92 | 9,27E-01 |
| A2A5R2         | 8  | 8  | 19,29  | 99371  | Arfgef2        | 5 | 1,09 | 9,65E-01 |
| Q64010         | 50 | 11 | 72,61  | 12928  | Crk            | 0 | 0,93 | 9,23E-01 |
| Q8BHL5         | 13 | 5  | 20,08  | 140579 | Elmo2          | 0 | 1,15 | 8,91E-01 |
| P28271         | 10 | 7  | 37,97  | 11428  | Aco1           | 0 | 0,96 | 9,74E-01 |
| Q3UH60         | 8  | 11 | 30,86  | 239667 | Dip2b          | 0 | 1,12 | 9,16E-01 |
| Q99J47         | 23 | 8  | 22,17  | 216820 | Dhrs7b         | 0 | 0,85 | 8,95E-01 |
| P27612         | 12 | 8  | 23,29  | 18786  | Plaa           | 0 | 0,96 | 9,76E-01 |
| Q99JY0         | 20 | 9  | 48,72  | 231086 | Hadhb          | 0 | 0,75 | 2,56E-01 |
| Q9R0P5         | 32 | 4  | 112,78 | 56431  | Dstn           | 0 | 1,01 | 9,99E-01 |
| Q8CIG8         | 18 | 11 | 32,77  | 27374  | Prmt5          | 0 | 1,07 | 9,76E-01 |
| P63137         | 19 | 4  | 43,81  | 14401  | Gabrb2         | 1 | 0,98 | 9,85E-01 |
| O35682         | 19 | 4  | 90,09  | 50918  | Myadm          | 0 | 1,12 | 9,03E-01 |
| Q62283         | 18 | 4  | 85,59  | 21912  | Tspan7         | 0 | 1,01 | 1,00E+00 |
| Q9DCT8         | 34 | 3  | 34,87  | 68337  | Crip2          | 0 | 1,25 | 6,86E-01 |

|            |    |    |        |        |          |   |      |          |
|------------|----|----|--------|--------|----------|---|------|----------|
| Q9D0L7     | 31 | 7  | 53,03  | 67211  | Armc10   | 0 | 0,93 | 9,32E-01 |
| Q5SSM3     | 9  | 7  | 36,92  | 216831 | Arhgap44 | 0 | 1,39 | 4,42E-01 |
| Q9Z2C4     | 14 | 9  | 48,19  | 53332  | Mtmr1    | 0 | 0,93 | 9,21E-01 |
| P54822     | 20 | 7  | 45,41  | 11564  | Adsl     | 0 | 1,03 | 9,96E-01 |
| Q80XI4     | 15 | 3  | 52,66  | 108083 | Pip4k2b  | 0 | 1,06 | 9,76E-01 |
| Q61831     | 17 | 2  | 56,95  | 26414  | Mapk10   | 6 | 1,07 | 9,67E-01 |
| P55288     | 14 | 8  | 29,47  | 12552  | Cdh11    | 0 | 1,02 | 1,00E+00 |
| Q9QXW9     | 11 | 6  | 69,25  | 50934  | Slc7a8   | 0 | 0,94 | 9,42E-01 |
| GELS_HUMAN | 12 | 3  | 40,95  | 2934   | GSN      | 0 | 0,37 | 4,63E-03 |
| Q8BNU0     | 25 | 8  | 46,14  | 76813  | Armc6    | 0 | 1,40 | 3,35E-01 |
| Q99MX7     | 18 | 6  | 32,98  | 94047  | Tmem121b | 0 | 0,88 | 8,23E-01 |
| Q922Q1     | 23 | 9  | 76,97  | 67247  | Mtarc2   | 0 | 0,81 | 6,36E-01 |
| O70252     | 23 | 7  | 32,43  | 15369  | Hmox2    | 0 | 1,02 | 1,00E+00 |
| Q9CPU4     | 33 | 4  | 61,46  | 66447  | Mgst3    | 0 | 0,75 | 3,03E-01 |
| Q7TPB0     | 12 | 7  | 38,47  | 216152 | Plppr3   | 0 | 0,83 | 8,11E-01 |
| P22723     | 13 | 7  | 39,89  | 14406  | Gabrg2   | 0 | 1,42 | 2,28E-01 |
| Q8BPU7     | 13 | 7  | 15,84  | 140580 | Elmo1    | 1 | 0,97 | 9,76E-01 |
| Q9CQ54     | 35 | 6  | 78,27  | 68197  | Ndufc2   | 0 | 0,76 | 3,68E-01 |
| Q63810     | 25 | 5  | 107,25 | 19058  | Ppp3r1   | 0 | 1,43 | 1,46E-01 |
| Q9D2N4     | 11 | 7  | 45,78  | 13527  | Dtna     | 0 | 1,06 | 9,76E-01 |
| P50171     | 31 | 6  | 42,92  | 14979  | Hsd17b8  | 0 | 0,65 | 2,28E-01 |
| O70503     | 30 | 8  | 34,76  | 56348  | Hsd17b12 | 0 | 1,09 | 9,56E-01 |
| O54833     | 20 | 6  | 31,26  | 13000  | Csnk2a2  | 0 | 1,22 | 7,73E-01 |
| Q9R1P0     | 28 | 8  | 82,46  | 26441  | Psma4    | 0 | 1,17 | 8,01E-01 |
| Q9WV69     | 26 | 9  | 49,24  | 13829  | Dmtn     | 0 | 1,09 | 9,59E-01 |
| O35295     | 23 | 6  | 53,38  | 19291  | Purb     | 0 | 0,96 | 9,74E-01 |
| Q32MW3     | 18 | 9  | 61,39  | 64833  | Acot10   | 0 | 1,05 | 9,76E-01 |
| Q9JIF0     | 23 | 6  | 47,23  | 15469  | Prmt1    | 3 | 0,93 | 9,34E-01 |
| P29533     | 14 | 8  | 24,46  |        | Vcam1    | 0 | 1,18 | 8,09E-01 |
| Q9CYH2     | 35 | 8  | 59,02  | 70564  | Prxl2a   | 0 | 0,93 | 9,32E-01 |
| Q6KAR6     | 11 | 7  | 41,79  | 211446 | Exoc3    | 0 | 0,89 | 8,42E-01 |
| P20917     | 14 | 6  | 34,08  | 17136  | Mag      | 0 | 0,96 | 9,71E-01 |
| P50571     | 20 | 3  | 23,65  | 14400  | Gabrb1   | 0 | 0,94 | 9,48E-01 |
| Q8K354     | 37 | 7  | 68,82  | 109857 | Cbr3     | 0 | 0,93 | 9,36E-01 |
| Q6VNS1     | 8  | 3  | 62,35  | 18213  | Ntrk3    | 0 | 0,97 | 9,76E-01 |
| Q8VDP6     | 22 | 4  | 52,61  | 52858  | Cdipt    | 0 | 1,13 | 9,02E-01 |
| P63168     | 40 | 2  | 64,36  | 56455  | Dynll1   | 0 | 1,59 | 4,46E-01 |
| Q99J99     | 27 | 7  | 43     | 246221 | Mpst     | 0 | 0,82 | 6,29E-01 |
| Q8BY89     | 11 | 7  | 74,02  | 68682  | Slc44a2  | 0 | 0,78 | 4,04E-01 |
| Q3UIU2     | 36 | 5  | 49,68  | 230075 | Ndufb6   | 0 | 0,76 | 3,81E-01 |
| Q80WG5     | 13 | 10 | 34,29  | 241296 | Lrrc8a   | 1 | 0,82 | 6,52E-01 |
| Q9QUP5     | 24 | 9  | 66,93  | 12950  | Hapln1   | 0 | 1,12 | 9,23E-01 |
| P15209     | 11 | 4  | 23,19  | 18212  | Ntrk2    | 4 | 1,03 | 9,91E-01 |
| Q8BTX9     | 15 | 5  | 72,75  | 72552  | Hsd11    | 0 | 1,12 | 9,16E-01 |
| Q8BJU0     | 27 | 7  | 56,03  | 52551  | Sgta     | 0 | 0,90 | 8,85E-01 |
| B0F2B4     | 8  | 3  | 62,22  |        | Nlgn4l   | 0 | 1,04 | 9,97E-01 |

|        |    |    |        |        |          |   |      |          |
|--------|----|----|--------|--------|----------|---|------|----------|
| Q6P5F9 | 8  | 7  | 19,5   | 103573 | Xpo1     | 0 | 1,01 | 1,00E+00 |
| Q8VCW8 | 13 | 7  | 41,55  | 264895 | Acsf2    | 0 | 0,67 | 2,91E-01 |
| Q8VEH5 | 10 | 5  | 32,97  | 77781  | Epm2aip1 | 0 | 1,10 | 9,65E-01 |
| Q9D5T0 | 25 | 7  | 22,11  | 67979  | Atad1    | 0 | 1,04 | 9,85E-01 |
| Q8R0S4 | 17 | 3  | 47,36  | 12298  | Cacnb4   | 0 | 0,86 | 9,16E-01 |
| Q6PGE7 | 8  | 6  | 74,88  | 240332 | Slc6a7   | 0 | 1,02 | 9,91E-01 |
| Q9Z2U1 | 24 | 5  | 87,5   | 26442  | Psma5    | 0 | 1,05 | 9,76E-01 |
| P24369 | 35 | 7  | 33,61  | 19035  | Ppib     | 0 | 1,13 | 9,19E-01 |
| P63037 | 19 | 6  | 36,67  | 15502  | Dnaja1   | 0 | 1,23 | 6,51E-01 |
| O70456 | 19 | 2  | 270,49 | 55948  | Sfn      | 0 | 1,14 | 9,71E-01 |
| Q9WTQ5 | 8  | 9  | 6,68   | 83397  | Akap12   | 0 | 1,20 | 8,91E-01 |
| Q06890 | 19 | 9  | 41,79  | 12759  | Clu      | 0 | 0,96 | 9,74E-01 |
| P62743 | 36 | 5  | 74,95  | 232910 | Ap2s1    | 0 | 1,16 | 8,33E-01 |
| P55302 | 26 | 9  | 30,63  | 16976  | Lrpap1   | 0 | 0,79 | 5,68E-01 |
| Q0VBF8 | 21 | 2  | 102,41 | 381310 | Stum     | 0 | 0,92 | 8,93E-01 |
| Q9CR26 | 20 | 5  | 39,25  | 66201  | Vta1     | 0 | 1,07 | 9,74E-01 |
| Q920P3 | 12 | 9  | 37,15  | 56710  | Brinp1   | 0 | 0,98 | 9,78E-01 |
| Q9D6F4 | 22 | 9  | 26,76  | 14397  | Gabra4   | 0 | 0,90 | 8,89E-01 |
| Q64331 | 8  | 8  | 29,75  |        | Myo6     | 0 | 1,16 | 8,54E-01 |
| Q6GQT9 | 9  | 9  | 20,11  | 211548 | Nomo1    | 0 | 0,66 | 1,46E-01 |
| Q9DBT5 | 11 | 9  | 40,12  | 109674 | Ampd2    | 0 | 1,11 | 9,12E-01 |
| Q99LR1 | 15 | 6  | 46,61  | 76192  | Abhd12   | 0 | 1,12 | 9,34E-01 |
| Q8R550 | 17 | 10 | 15,5   | 58194  | Sh3kbp1  | 0 | 1,08 | 9,61E-01 |
| P26048 | 14 | 3  | 54,61  | 14395  | Gabra2   | 0 | 0,81 | 7,18E-01 |
| P54728 | 24 | 10 | 47,76  | 19359  | Rad23b   | 0 | 0,91 | 9,09E-01 |
| Q9CZY3 | 41 | 6  | 96,35  | 66589  | Ube2v1   | 0 | 1,01 | 1,00E+00 |
| P28571 | 9  | 5  | 54,23  | 14664  | Slc6a9   | 0 | 0,77 | 4,24E-01 |
| Q9CRB6 | 35 | 7  | 62,58  | 67971  | Tppp3    | 0 | 1,17 | 8,44E-01 |
| A2ASZ8 | 16 | 5  | 56,96  | 227731 | Slc25a25 | 0 | 0,79 | 5,02E-01 |
| Q3UEZ8 | 5  | 3  | 71,88  | 231290 | Slc10a4  | 0 | 2,47 | 4,67E-08 |
| Q9JJV2 | 36 | 5  | 69,76  | 18645  | Pfn2     | 0 | 1,35 | 3,68E-01 |
| Q9CR61 | 45 | 5  | 39,11  | 66916  | Ndufb7   | 0 | 1,07 | 9,74E-01 |
| Q91ZU6 | 2  | 11 | 1,66   | 13518  | Dst      | 0 | 0,84 | 8,85E-01 |
| Q5PR73 | 41 | 6  | 85,42  | 68203  | Diras2   | 0 | 1,05 | 9,78E-01 |
| P11404 | 61 | 8  | 84,86  | 14077  | Fabp3    | 0 | 1,18 | 7,74E-01 |
| Q9D1G5 | 38 | 9  | 28,95  |        | Lrrc57   | 0 | 0,98 | 9,76E-01 |
| Q6PDL0 | 17 | 7  | 40,48  | 234663 | Dync1li2 | 0 | 1,03 | 9,97E-01 |
| Q922Q4 | 32 | 7  | 37,62  | 69051  | Pycr2    | 0 | 0,94 | 9,56E-01 |
| Q8C078 | 20 | 10 | 26,95  | 207565 | Camkk2   | 0 | 1,00 | 9,87E-01 |
| Q06138 | 24 | 8  | 30,81  | 12283  | Cab39    | 0 | 1,21 | 7,39E-01 |
| Q6NS60 | 12 | 10 | 50,74  | 330369 | Fbxo41   | 0 | 1,14 | 8,91E-01 |
| P47934 | 13 | 7  | 35,35  | 12908  | Crat     | 0 | 0,95 | 9,64E-01 |
| P60766 | 31 | 4  | 78,36  | 12540  | Cdc42    | 0 | 1,64 | 2,22E-02 |
| O88543 | 14 | 5  | 61,71  | 26572  | Cops3    | 0 | 1,05 | 9,78E-01 |
| P47199 | 31 | 7  | 39,72  | 12972  | Cryz     | 0 | 0,71 | 1,72E-01 |
| A2A690 | 5  | 11 | 3,95   | 77097  | Tanc2    | 0 | 1,08 | 9,65E-01 |
| Q99KH8 | 21 | 4  | 39,57  | 223255 | Stk24    | 4 | 1,32 | 4,82E-01 |

|        |    |    |        |                                           |         |   |      |          |
|--------|----|----|--------|-------------------------------------------|---------|---|------|----------|
| Q8VHJ5 | 11 | 5  | 32,59  | 226778                                    | Mark1   | 0 | 0,83 | 8,11E-01 |
| P48193 | 13 | 5  | 11,84  | 269587                                    | Epb41   | 0 | 0,87 | 9,32E-01 |
| O54901 | 16 | 4  | 100,33 |                                           | Cd200   | 0 | 1,56 | 4,81E-02 |
| Q61735 | 18 | 5  | 110,14 | 16423                                     | Cd47    | 0 | 0,89 | 8,58E-01 |
| Q7TSQ8 | 10 | 9  | 31,53  | 319518                                    | Pdpr    | 0 | 0,75 | 3,18E-01 |
| Q8BH44 | 17 | 9  | 28,45  | 235431                                    | Coro2b  | 0 | 1,21 | 7,61E-01 |
| Q9D892 | 23 | 5  | 60,07  | 16434                                     | Itpa    | 0 | 1,08 | 9,67E-01 |
| Q9D819 | 23 | 8  | 69,4   | 67895                                     | Ppa1    | 0 | 1,08 | 9,67E-01 |
| P84084 | 34 | 4  | 106,38 | 11844                                     | Arf5    | 0 | 1,13 | 9,02E-01 |
| Q9R257 | 26 | 4  | 27,44  | 15199                                     | Hebp1   | 0 | 0,89 | 9,34E-01 |
| Q920E5 | 24 | 7  | 42,9   | 110196                                    | Fdps    | 0 | 1,40 | 2,39E-01 |
| P55066 | 7  | 10 | 93,03  | 13004                                     | Ncan    | 0 | 0,99 | 9,81E-01 |
| Q9CQZ5 | 54 | 6  | 75,36  | 67130                                     | Ndufa6  | 0 | 0,98 | 9,76E-01 |
| Q9JI18 | 2  | 9  | 14,88  |                                           | Lrp1b   | 0 | 1,11 | 9,76E-01 |
| Q80UW2 | 24 | 5  | 68,94  | 230904                                    | Fbxo2   | 0 | 0,81 | 7,33E-01 |
| P60764 | 33 | 2  | 99,93  | 170758                                    | Rac3    | 0 | 1,62 | 1,94E-01 |
| Q9JIW9 | 27 | 4  | 47,7   | 64143                                     | Ralb    | 0 | 1,22 | 9,23E-01 |
| Q8CHU3 | 16 | 7  | 24,35  | 13855                                     | Epn2    | 0 | 0,78 | 6,82E-01 |
| Q9DBE8 | 15 | 5  | 23,69  | 56737                                     | Alg2    | 0 | 0,79 | 6,58E-01 |
| Q3UH66 | 6  | 8  | 26,3   | 75607                                     | Wnk2    | 2 | 1,01 | 9,97E-01 |
| Q791T5 | 21 | 7  | 58,57  | 56462                                     | Mtch1   | 0 | 0,73 | 2,19E-01 |
| Q9Z0J4 | 7  | 8  | 31,58  | 18125                                     | Nos1    | 0 | 0,81 | 6,07E-01 |
| F8VPU2 | 8  | 7  | 42,05  | 223254                                    | Farp1   | 0 | 0,74 | 3,02E-01 |
| Q99KE1 | 15 | 5  | 54,62  | 107029                                    | Me2     | 0 | 0,92 | 9,56E-01 |
| Q8K097 | 7  | 2  | 58,23  | 72393                                     | Faim2   | 0 | 1,00 | 9,96E-01 |
| O35963 | 16 | 2  | 187,52 | 19338                                     | Rab33b  | 0 | 1,16 | 8,91E-01 |
| Q61035 | 18 | 2  | 58,57  | 15115                                     | Hars1   | 7 | 1,45 | 1,61E-01 |
| Q9WTR5 | 11 | 5  | 48,28  | 12554                                     | Cdh13   | 0 | 0,88 | 8,07E-01 |
| Q80VL1 | 19 | 8  | 22,77  | 72634                                     | Tdrkh   | 0 | 0,71 | 3,52E-01 |
| Q9D8U8 | 19 | 8  | 45,11  | 69178                                     | Snx5    | 0 | 0,88 | 7,86E-01 |
| D3YWQ0 | 8  | 6  | 26,31  | 320127                                    | Dgki    | 0 | 1,07 | 9,76E-01 |
| Q8BH55 | 11 | 7  | 24,02  | 208967                                    | Thns11  | 0 | 0,78 | 5,84E-01 |
| P55088 | 20 | 5  | 46,45  | 11829                                     | Aqp4    | 0 | 0,70 | 1,28E-01 |
| P70182 | 5  | 3  | 48,71  | 18720                                     | Pip5k1a | 0 | 1,06 | 9,76E-01 |
| P47746 | 10 | 6  | 52,94  | 12801                                     | Cnr1    | 0 | 0,79 | 5,42E-01 |
| P63046 | 20 | 5  | 30,14  | 29859                                     | Sult4a1 | 0 | 1,19 | 8,33E-01 |
| Q8BJY1 | 14 | 7  | 47,08  | 66998                                     | Psmc5   | 0 | 0,97 | 9,74E-01 |
| P62827 | 32 | 7  | 106,44 | 19384                                     | Ran     | 0 | 1,13 | 8,85E-01 |
| P04370 | 18 | 5  | 67,5   | 17196                                     | Mbp     | 0 | 0,68 | 8,48E-02 |
| P02088 | 45 | 4  | 84,12  | 100503<br>605;<br>101488<br>143;<br>15129 | Hbb-b1  | 0 | 1,27 | 5,85E-01 |
| P47809 | 18 | 6  | 63,52  | 26398                                     | Map2k4  | 0 | 1,29 | 5,46E-01 |
| Q9WTX5 | 39 | 6  | 39,21  | 21402                                     | Skp1    | 0 | 1,11 | 9,56E-01 |
| Q9JHK4 | 17 | 10 | 32,89  | 56187                                     | Rabggt  | 0 | 0,73 | 1,94E-01 |
| Q9D7B6 | 23 | 9  | 18,72  | 66948                                     | Acad8   | 0 | 1,16 | 8,89E-01 |

|                |    |    |        |                          |                                                  |   |      |          |
|----------------|----|----|--------|--------------------------|--------------------------------------------------|---|------|----------|
| P97315         | 30 | 5  | 47,69  | 13007                    | Csrp1                                            | 0 | 0,76 | 3,87E-01 |
| P09528         | 42 | 8  | 51,88  | 14319                    | Fth1                                             | 0 | 1,18 | 7,50E-01 |
| Q64433         | 65 | 7  | 61,91  | 15528                    | Hspe1                                            | 0 | 1,15 | 8,43E-01 |
| Q69Z98         | 13 | 5  | 30,31  | 75770                    | Brsk2                                            | 2 | 1,23 | 7,46E-01 |
| P12787         | 27 | 5  | 82,04  | 12858                    | Cox5a                                            | 0 | 0,82 | 6,74E-01 |
| Q3THK7         | 13 | 7  | 22,17  | 229363                   | Gmps                                             | 0 | 1,01 | 1,00E+00 |
| Q6I6G8         | 7  | 9  | 7,99   | 329152                   | Hecw2                                            | 0 | 1,36 | 6,27E-01 |
| Q9ERB0         | 35 | 7  | 23,03  | 67474                    | Snap29                                           | 0 | 1,17 | 8,25E-01 |
| P84086         | 31 | 2  | 34,39  | 12890                    | Cplx2                                            | 4 | 0,95 | 9,70E-01 |
| Q3TY60         | 17 | 5  | 27,51  | 76156                    | Fam131b                                          | 0 | 0,95 | 9,74E-01 |
| Q0VBK2         | 12 | 6  | 104,39 | 74127                    | Krt80                                            | 0 | 1,10 | 9,48E-01 |
| Q8K0T7         | 2  | 6  | 20,74  | 208898                   | Unc13c                                           | 0 | 1,27 | 6,42E-01 |
| Q8R574         | 25 | 6  | 28,65  | 212627                   | Prpsap2                                          | 1 | 0,85 | 7,09E-01 |
| Q8C031         | 13 | 6  | 28,72  | 241568                   | Lrrc4c                                           | 0 | 1,11 | 9,41E-01 |
| Q99PL6         | 22 | 9  | 58,49  | 66530                    | Ubxn6                                            | 0 | 1,10 | 9,34E-01 |
| Q8BGZ1         | 32 | 3  | 44,56  | 170638                   | Hpcal4                                           | 0 | 1,10 | 9,64E-01 |
| Q01063         | 9  | 4  | 38,08  | 238871                   | Pde4d                                            | 2 | 1,63 | 4,81E-02 |
| Q3UHH2         | 11 | 6  | 45,8   | 73102                    | Slc22a23                                         | 0 | 1,00 | 1,00E+00 |
| O35449         | 12 | 3  | 65,59  | 260297                   | Prrt1                                            | 0 | 0,96 | 9,72E-01 |
| O88746         | 16 | 5  | 45,8   | 21968                    | Tom1                                             | 0 | 1,12 | 9,34E-01 |
| P42125         | 26 | 6  | 16,33  | 13177                    | Eci1                                             | 0 | 0,79 | 5,32E-01 |
| B1AXV0         | 22 | 8  | 43,14  | 230235                   | Frrs11                                           | 0 | 0,91 | 8,85E-01 |
| Q5DTL9         | 9  | 8  | 15,53  | 94229                    | Slc4a10                                          | 0 | 0,95 | 9,76E-01 |
| Q61627         | 10 | 7  | 31,17  | 14803                    | Grid1                                            | 1 | 0,65 | 2,15E-01 |
| Q9Z0P5         | 15 | 3  | 35,23  | 23999                    | Twf2                                             | 0 | 1,02 | 1,00E+00 |
| Q9WUM3         | 18 | 8  | 40,48  | 23789                    | Coro1b                                           | 0 | 1,03 | 9,94E-01 |
| Q9CQ60         | 31 | 7  | 20,59  | 66171                    | Pgls                                             | 0 | 1,01 | 1,00E+00 |
| P56391         | 80 | 8  | 62,26  | 110323                   | Cox6b1                                           | 0 | 0,75 | 3,29E-01 |
| Q8BVQ5         | 17 | 6  | 46,67  | 72590                    | Ppme1                                            | 0 | 1,18 | 8,49E-01 |
| Q9D0M1         | 25 | 5  | 32,47  | 67763                    | Prpsap1                                          | 0 | 1,14 | 9,16E-01 |
| Q8CE50         | 20 | 8  | 22,12  | 209131                   | Snx30                                            | 0 | 0,92 | 9,30E-01 |
| Q8R3Q2         | 9  | 5  | 19,93  |                          | Ppp6r2                                           | 0 | 1,30 | 8,51E-01 |
| P22892         | 10 | 10 | 59,72  | 11765                    | Ap1g1                                            | 0 | 0,99 | 9,83E-01 |
| P57776         | 21 | 4  | 34,35  | 66656                    | Eef1d                                            | 0 | 1,06 | 9,78E-01 |
| P18242         | 19 | 5  | 34     | 13033                    | Ctsd                                             | 0 | 0,64 | 2,37E-02 |
| P97370         | 24 | 6  | 58,98  | 11933                    | Atp1b3                                           | 0 | 1,07 | 9,71E-01 |
| Q8CJH3         | 5  | 8  | 52,46  | 235611                   | Plxnb1                                           | 1 | 0,89 | 8,62E-01 |
| CAS2_BO<br>VIN | 31 | 7  | 36,74  | 109560<br>546;<br>282209 | CSN1S2;<br>LOC1095<br>60546;<br>LOC1138<br>94643 | 0 | 1,08 | 9,60E-01 |
| Q91YE6         | 7  | 5  | 36,2   |                          | Ipo9                                             | 0 | 0,95 | 9,76E-01 |
| P14869         | 25 | 6  | 29,93  | 11837                    | Rplp0                                            | 0 | 0,97 | 9,76E-01 |
| Q91YP2         | 15 | 8  | 30,93  | 75805                    | Nln                                              | 0 | 0,90 | 8,86E-01 |
| Q9CPQ1         | 63 | 7  | 81,91  | 12864                    | Cox6c                                            | 0 | 1,13 | 8,86E-01 |
| THIO_HU<br>MAN | 35 | 2  | 83,08  |                          |                                                  | 2 | 1,23 | 6,58E-01 |

|        |    |    |        |        |         |   |      |          |
|--------|----|----|--------|--------|---------|---|------|----------|
| Q9CZN4 | 15 | 5  | 44,49  | 72555  | Shisa9  | 0 | 1,12 | 9,25E-01 |
| P70408 | 10 | 6  | 33,21  | 320873 | Cdh10   | 1 | 0,91 | 9,50E-01 |
| Q9CWH6 | 16 | 3  | 79,8   | 73677  | Psma8   | 0 | 1,27 | 5,84E-01 |
| Q8BLJ3 | 17 | 4  | 20,17  | 239318 | Plexd3  | 0 | 2,16 | 2,11E-02 |
| Q9Z1P6 | 64 | 7  | 38,26  | 66416  | Ndufa7  | 0 | 0,94 | 9,34E-01 |
| Q6PD03 | 15 | 5  | 25,13  | 226849 | Ppp2r5a | 0 | 1,02 | 1,00E+00 |
| Q7TN29 | 21 | 6  | 57,8   | 69780  | Smap2   | 1 | 0,97 | 9,74E-01 |
| O35681 | 12 | 6  | 49,49  | 20981  | Syt3    | 0 | 0,94 | 9,56E-01 |
| Q9CQ62 | 16 | 4  | 66,33  | 67460  | Decr1   | 0 | 0,95 | 9,56E-01 |
| Q8BFZ9 | 20 | 4  | 47,69  | 244373 | Erlin2  | 1 | 1,06 | 9,74E-01 |
| Q91Y86 | 20 | 3  | 28,35  | 26419  | Mapk8   | 1 | 1,02 | 1,00E+00 |
| Q9CXZ1 | 31 | 5  | 42,99  | 17993  | Ndufs4  | 0 | 0,82 | 6,27E-01 |
| Q9WUK2 | 24 | 4  | 49,92  | 22384  | Eif4h   | 0 | 0,84 | 7,52E-01 |
| O88441 | 16 | 5  | 46,28  | 53375  | Mtx2    | 0 | 0,78 | 4,01E-01 |
| P26049 | 16 | 5  | 33,64  | 14396  | Gabra3  | 0 | 0,48 | 4,21E-03 |
| Q9Z329 | 3  | 10 | 3,71   | 16439  | Itpr2   | 0 | 0,99 | 9,80E-01 |
| Q62083 | 16 | 6  | 33,66  |        | Pick1   | 0 | 1,07 | 9,74E-01 |
| Q920Q4 | 9  | 7  | 48,67  |        | Vps16   | 0 | 1,01 | 1,00E+00 |
| Q8VBV7 | 30 | 4  | 45,46  | 108679 | Cops8   | 0 | 1,06 | 9,76E-01 |
| Q3TLI0 | 6  | 7  | 14,03  |        |         | 0 | 0,79 | 4,61E-01 |
| Q9CYZ2 | 29 | 5  | 40,8   | 66314  | Tpd5212 | 0 | 1,36 | 3,52E-01 |
| Q6A065 | 5  | 5  | 10,79  | 545389 | Cep170  | 2 | 1,24 | 8,43E-01 |
| Q60575 | 4  | 7  | 39,78  | 16561  | Kif1b   | 0 | 1,01 | 1,00E+00 |
| Q9EQ80 | 25 | 7  | 27,23  | 65102  | Nif311  | 0 | 1,09 | 9,64E-01 |
| Q9R1Q9 | 7  | 5  | 79,52  | 54411  | Atp6ap1 | 0 | 1,13 | 8,85E-01 |
| P20352 | 20 | 5  | 30,23  | 14066  | F3      | 0 | 1,05 | 9,83E-01 |
| P53395 | 19 | 9  | 32,7   | 13171  | Dbt     | 0 | 0,78 | 4,63E-01 |
| Q9CQ92 | 24 | 4  | 33,41  | 66437  | Fis1    | 0 | 2,12 | 1,14E-04 |
| Q69Z26 | 7  | 6  | 32,38  | 269784 | Cntn4   | 0 | 0,93 | 9,42E-01 |
| Q91YI0 | 18 | 7  | 11,49  | 109900 | Asl     | 0 | 0,83 | 6,90E-01 |
| Q3UHK1 | 11 | 7  | 11,97  | 239606 | Slc2a13 | 0 | 1,30 | 5,42E-01 |
| P70181 | 4  | 2  | 33,2   | 18719  | Pip5k1b | 0 | 0,94 | 9,39E-01 |
| Q8K012 | 14 | 8  | 18,59  |        | Fnbp11  | 0 | 0,97 | 9,77E-01 |
| Q6NVG1 | 12 | 5  | 33,22  | 99010  | Lpcat4  | 0 | 0,93 | 9,74E-01 |
| P84096 | 26 | 2  | 41,67  | 56212  | Rhog    | 0 | 0,75 | 7,38E-01 |
| P52760 | 42 | 5  | 40,07  | 15473  | Rida    | 0 | 1,08 | 9,63E-01 |
| Q91YP0 | 16 | 7  | 35,7   | 217666 | L2hgdh  | 0 | 0,83 | 8,65E-01 |
| Q9DCP2 | 11 | 5  | 59,69  | 76257  | Slc38a3 | 0 | 1,20 | 7,49E-01 |
| Q923S9 | 32 | 4  | 157,21 | 75985  | Rab30   | 0 | 0,86 | 8,85E-01 |
| Q99L04 | 22 | 7  | 59,99  | 52585  | Dhrs1   | 0 | 0,79 | 4,98E-01 |
| P11835 | 10 | 6  | 14,21  | 16414  | Itgb2   | 0 | 0,40 | 1,06E-02 |
| Q99P47 | 7  | 9  | 13,37  | 170571 | Cntnap4 | 0 | 1,29 | 7,99E-01 |
| Q9DCR2 | 34 | 6  | 20,86  | 11777  | Ap3s1   | 0 | 1,22 | 7,93E-01 |
| Q8R317 | 17 | 5  | 19,57  | 56085  | Ubqln1  | 0 | 1,15 | 9,64E-01 |
| Q8C7X2 | 8  | 6  | 31,36  | 230866 | Emc1    | 0 | 0,84 | 6,92E-01 |
| P14206 | 22 | 5  | 42,59  | 16785  | Rpsa    | 0 | 1,17 | 8,86E-01 |
| P97445 | 3  | 6  | 34,32  | 12286  | Cacna1a | 0 | 1,02 | 1,00E+00 |

|        |    |   |       |                       |          |   |      |          |
|--------|----|---|-------|-----------------------|----------|---|------|----------|
| Q8BVI5 | 19 | 5 | 15,77 | 228960                | Stx16    | 0 | 0,95 | 9,76E-01 |
| Q99K10 | 6  | 2 | 78,69 | 192167                | Nlgn1    | 0 | 1,07 | 9,74E-01 |
| Q6NVE9 | 21 | 5 | 15,97 | 320717                | Pptc7    | 0 | 0,62 | 2,75E-01 |
| Q6PAK3 | 16 | 4 | 43,11 | 381813                | Prmt8    | 0 | 1,01 | 9,96E-01 |
| Q9CR00 | 30 | 6 | 31,67 | 67151                 | Psmc9    | 0 | 1,26 | 5,86E-01 |
| Q6NVE8 | 10 | 7 | 16,11 | 72404                 | Wdr44    | 0 | 1,36 | 4,13E-01 |
| P43406 | 10 | 9 | 8,51  | 16410                 | Itgav    | 0 | 1,04 | 9,85E-01 |
| Q8BW96 | 22 | 3 | 27,4  | 227541                | Camk1d   | 4 | 1,22 | 8,40E-01 |
| Q8C522 | 12 | 5 | 34,22 | 71946                 | Endod1   | 0 | 1,14 | 8,95E-01 |
| P34152 | 7  | 5 | 32,08 | 14083                 | Ptk2     | 0 | 0,96 | 9,76E-01 |
| P57759 | 27 | 6 | 47,34 | 67397                 | Erp29    | 0 | 0,88 | 8,25E-01 |
| P35436 | 6  | 8 | 9,41  | 14811                 | Grin2a   | 0 | 1,16 | 8,45E-01 |
| Q9D0L4 | 13 | 5 | 13,56 | 72113                 | Adck1    | 0 | 0,77 | 6,46E-01 |
| Q640R3 | 16 | 5 | 36,9  | 72927                 | Hepacam  | 0 | 1,17 | 8,53E-01 |
| Q7TSF0 | 4  | 5 | 76,27 | 211924                | Dsg1c    | 0 | 0,91 | 9,15E-01 |
| Q9WV31 | 15 | 5 | 43,07 | 11838                 | Arc      | 0 | 0,95 | 9,70E-01 |
| Q5M8N4 | 22 | 6 | 39,01 | 654795                | Sdr39u1  | 0 | 1,07 | 9,76E-01 |
| P03888 | 11 | 4 | 39,8  | 17716;<br>333890<br>2 | Mtnd1    | 0 | 0,92 | 9,09E-01 |
| Q9Z0Y1 | 38 | 9 | 78,96 | 53598                 | Dctn3    | 0 | 1,23 | 6,42E-01 |
| P28474 | 19 | 6 | 39,59 | 11532                 | Adh5     | 0 | 1,12 | 9,17E-01 |
| P16332 | 10 | 5 | 17,19 | 17850                 | Mmut     | 0 | 1,10 | 9,32E-01 |
| P56135 | 38 | 3 | 53,62 | 57423                 | Atp5mf   | 0 | 0,77 | 4,31E-01 |
| Q8JZZ7 | 4  | 3 | 19,77 |                       | Adgrl2   | 0 | 1,04 | 1,00E+00 |
| Q9JI46 | 36 | 4 | 37,03 | 56409                 | Nudt3    | 1 | 0,99 | 9,85E-01 |
| Q8CHT1 | 11 | 7 | 35,9  | 53972                 | Ngef     | 0 | 1,18 | 7,99E-01 |
| Q9DB75 | 18 | 3 | 50,31 | 66626                 | Cdip1    | 0 | 0,84 | 6,61E-01 |
| P18052 | 8  | 5 | 27,64 | 19262                 | Ptpa     | 1 | 0,73 | 3,76E-01 |
| Q9JMH6 | 11 | 6 | 46,45 | 50493                 | Txnrd1   | 0 | 1,26 | 6,58E-01 |
| Q62433 | 16 | 4 | 38,54 | 17988                 | Ndrp1    | 0 | 1,08 | 9,76E-01 |
| Q9DCZ4 | 27 | 5 | 80,41 | 68316                 | Apoo     | 0 | 0,93 | 9,25E-01 |
| P54227 | 36 | 4 | 82,23 | 16765                 | Stmn1    | 2 | 0,96 | 9,74E-01 |
| Q9JL56 | 21 | 7 | 54,3  | 56209                 | Gde1     | 0 | 0,99 | 9,78E-01 |
| Q9QUR7 | 50 | 5 | 26,98 | 23988                 | Pin1     | 0 | 1,15 | 8,81E-01 |
| B2RUJ5 | 11 | 7 | 25,8  | 319924                | Apba1    | 0 | 1,57 | 4,46E-02 |
| P59999 | 36 | 6 | 78,99 | 68089                 | Arpc4    | 0 | 1,17 | 7,90E-01 |
| P11352 | 29 | 6 | 38,41 | 14775                 | Gpx1     | 0 | 1,01 | 1,00E+00 |
| Q9CWE0 | 20 | 5 | 31,23 | 76824                 | Mtfr11   | 0 | 0,96 | 9,76E-01 |
| A2AGL3 | 2  | 5 | 3,88  | 20192                 | Ryr3     | 0 | 0,86 | 9,47E-01 |
| Q9D379 | 22 | 9 | 24,37 | 13849                 | Ephx1    | 0 | 1,11 | 9,41E-01 |
| Q61543 | 5  | 6 | 25,19 | 20340                 | Glg1     | 0 | 0,99 | 9,94E-01 |
| Q9DBR7 | 9  | 7 | 15,81 | 17931                 | Ppp1r12a | 0 | 1,51 | 2,83E-01 |
| Q9CQM9 | 19 | 6 | 34,21 | 30926                 | Glx3     | 0 | 0,95 | 9,60E-01 |
| Q9Z0F7 | 45 | 5 | 18,81 | 20618                 | Sncg     | 0 | 1,89 | 2,51E-03 |
| Q68ED2 | 10 | 6 | 23,08 | 108073                | Grm7     | 1 | 0,89 | 9,24E-01 |
| Q9DB60 | 27 | 5 | 31,96 | 66469                 | Prxl2b   | 0 | 1,09 | 9,64E-01 |

|             |    |   |        |        |         |   |      |          |
|-------------|----|---|--------|--------|---------|---|------|----------|
| P28028      | 9  | 5 | 39,42  |        |         | 2 | 0,85 | 7,12E-01 |
| Q8BRU6      | 6  | 3 | 26,26  | 214084 | Slc18a2 | 0 | 3,45 | 1,60E-16 |
| P35283      | 25 | 4 | 151,48 | 19328  | Rab12   | 0 | 1,92 | 1,80E-01 |
| Q9D906      | 14 | 9 | 9,82   | 74244  | Atg7    | 0 | 1,23 | 6,82E-01 |
| Q6IR34      | 16 | 9 | 6,33   | 67839  | Gpsm1   | 0 | 1,13 | 9,12E-01 |
| G3X9K3      | 5  | 4 | 15,98  | 211673 | Arfgef1 | 0 | 0,98 | 9,76E-01 |
| Q64467      | 5  | 2 | 168,55 | 14447  | Gapdhs  | 0 | 0,77 | 4,28E-01 |
| P59017      | 18 | 5 | 8,37   | 94044  | Bcl2l13 | 0 | 0,82 | 6,42E-01 |
| Q32M21      | 7  | 5 | 27,53  | 76758  | Gsdma2  | 0 | 0,77 | 4,61E-01 |
| Q8K0G5      | 17 | 5 | 31,98  | 380752 | Eipr1   | 0 | 1,30 | 5,50E-01 |
| Q11136      | 15 | 8 | 26,4   | 18624  | Pepd    | 0 | 1,42 | 2,01E-01 |
| Q9D7N9      | 17 | 7 | 28,11  | 71881  | Apmap   | 0 | 0,97 | 9,76E-01 |
| Q6ZPJ3      | 8  | 9 | 9,48   | 217342 | Ube2o   | 0 | 1,39 | 4,72E-01 |
| Q9JKD3      | 25 | 3 | 246,67 | 56807  | Scamp5  | 0 | 1,21 | 7,23E-01 |
| Q01341      | 6  | 6 | 26,56  | 11512  | Adcy6   | 0 | 0,93 | 9,39E-01 |
| Q9JHW2      | 24 | 6 | 35,26  | 52633  | Nit2    | 0 | 0,77 | 5,45E-01 |
| Q9D710      | 19 | 6 | 34,27  | 66958  | Tmx2    | 0 | 1,00 | 1,00E+00 |
| Q8VD65      | 6  | 7 | 8,94   | 75669  | Pik3r4  | 0 | 1,07 | 9,78E-01 |
| Q9R1V4      | 8  | 5 | 23,79  | 11488  | Adam11  | 0 | 1,01 | 9,97E-01 |
| Q9WV54      | 15 | 6 | 16,9   | 11886  | Asah1   | 0 | 0,42 | 2,58E-05 |
| Q5M8N0      | 30 | 5 | 80,61  | 380686 | Cnrip1  | 0 | 1,16 | 8,57E-01 |
| Q80W21      | 19 | 3 | 101,45 | 68312  | Gstm7   | 0 | 1,06 | 9,74E-01 |
| Q8C5H8      | 17 | 6 | 19,17  | 68646  | Nadk2   | 0 | 0,59 | 2,27E-01 |
| ANXA5_HUMAN | 15 | 6 | 43,92  |        |         | 0 | 0,92 | 9,18E-01 |
| O08795      | 10 | 6 | 39,04  | 19089  | Prkesh  | 0 | 0,83 | 6,52E-01 |
| Q8CHT0      | 10 | 5 | 23,84  | 212647 | Aldh4a1 | 0 | 0,74 | 3,31E-01 |
| A2AJA9      | 9  | 7 | 10,72  | 381353 | Ajm1    | 0 | 1,16 | 8,94E-01 |
| Q924L1      | 20 | 6 | 17,9   | 68614  | Letmd1  | 0 | 0,79 | 6,95E-01 |
| Q8BRF7      | 11 | 5 | 24,6   | 76983  | Scfd1   | 0 | 1,09 | 9,76E-01 |
| Q3TPX4      | 12 | 8 | 21,11  | 105504 | Exoc5   | 0 | 0,91 | 9,12E-01 |
| Q8BGQ1      | 15 | 5 | 16,29  | 104799 | Vipas39 | 0 | 0,95 | 9,76E-01 |
| Q06185      | 66 | 5 | 86,04  | 11958  | Atp5me  | 0 | 1,38 | 2,43E-01 |
| Q9CPX6      | 19 | 5 | 46,61  | 67841  | Atg3    | 0 | 1,36 | 6,66E-01 |
| Q8K1Z0      | 15 | 4 | 38,47  | 67914  | Coq9    | 0 | 0,68 | 1,44E-01 |
| Q62159      | 18 | 5 | 67,21  | 11853  | Rhoc    | 0 | 0,96 | 9,64E-01 |
| Q9JKB1      | 31 | 5 | 8,34   | 50933  | Uchl3   | 0 | 0,83 | 7,86E-01 |
| Q8VCH0      | 12 | 4 | 22,9   | 235674 | Acaa1b  | 0 | 1,10 | 9,76E-01 |
| P27546      | 7  | 6 | 37,02  | 17758  | Map4    | 0 | 0,75 | 4,31E-01 |
| Q3U0M1      | 7  | 7 | 14,12  | 76510  | Trappc9 | 0 | 0,98 | 9,78E-01 |
| CYC_HUMAN   | 27 | 5 | 50,24  |        |         | 0 | 0,97 | 9,76E-01 |
| P34022      | 37 | 6 | 56,92  | 19385  | Ranbp1  | 0 | 1,01 | 9,99E-01 |
| Q8BYA0      | 7  | 6 | 15,12  | 108903 | Tbcd    | 0 | 0,88 | 9,25E-01 |
| P36993      | 16 | 3 | 18,21  | 19043  | Ppm1b   | 0 | 1,36 | 7,86E-01 |
| Q8BXX8      | 8  | 3 | 44,06  | 347722 | Agap1   | 0 | 1,23 | 9,03E-01 |
| Q6X893      | 10 | 5 | 20,73  | 100434 | Slc44a1 | 0 | 0,87 | 9,12E-01 |
| P34914      | 11 | 5 | 32,84  | 13850  | Ephx2   | 0 | 0,99 | 9,97E-01 |



|               |    |   |       |                                                                                                                                                 |                                                                                                                 |   |      |          |
|---------------|----|---|-------|-------------------------------------------------------------------------------------------------------------------------------------------------|-----------------------------------------------------------------------------------------------------------------|---|------|----------|
| Q00558        | 14 | 3 | 33,56 |                                                                                                                                                 | F8a1                                                                                                            | 0 | 0,94 | 9,74E-01 |
| Q9D4H1        | 9  | 8 | 10,59 | 66482                                                                                                                                           | Exoc2                                                                                                           | 0 | 1,10 | 9,56E-01 |
| Q8CIQ7        | 4  | 7 | 5,93  |                                                                                                                                                 | Dock3                                                                                                           | 1 | 1,19 | 8,93E-01 |
| P59108        | 10 | 4 | 27,45 | 234577                                                                                                                                          | Cpne2                                                                                                           | 0 | 0,85 | 8,93E-01 |
| O35344        | 12 | 4 | 13,16 | 16648                                                                                                                                           | Kpna3                                                                                                           | 2 | 0,96 | 9,76E-01 |
| Q9CY64        | 23 | 6 | 25,92 | 109778                                                                                                                                          | Blvra                                                                                                           | 0 | 0,87 | 9,11E-01 |
| GAG_SCV<br>LA | 10 | 8 | 30,75 | 940477                                                                                                                                          | gag                                                                                                             | 0 | 0,01 | 1,60E-16 |
| Q3U5Q7        | 14 | 6 | 29,54 | 22169                                                                                                                                           | Cmpk2                                                                                                           | 0 | 1,03 | 9,91E-01 |
| Q60613        | 10 | 3 | 42,27 | 11540                                                                                                                                           | Adora2a                                                                                                         | 0 | 0,64 | 1,53E-01 |
| Q9D8B3        | 19 | 4 | 43,29 | 75608                                                                                                                                           | Chmp4b                                                                                                          | 0 | 1,05 | 9,76E-01 |
| Q6P9R2        | 13 | 5 | 3,85  | 108737                                                                                                                                          | Oxsr1                                                                                                           | 0 | 1,03 | 1,00E+00 |
| Q9JJ69        | 23 | 6 | 28,54 | 80906                                                                                                                                           | Kcnp2                                                                                                           | 0 | 0,95 | 9,64E-01 |
| Q8C7M3        | 7  | 5 | 29,73 | 94090                                                                                                                                           | Trim9                                                                                                           | 0 | 0,92 | 9,56E-01 |
| D3YZI9        | 12 | 6 | 40,52 | 209966                                                                                                                                          | Pgbd5                                                                                                           | 0 | 1,23 | 7,02E-01 |
| P62806        | 39 | 4 | 45,36 | 100041<br>230;<br>319155;<br>319156;<br>319157;<br>319158;<br>319159;<br>319160;<br>319161;<br>320332;<br>326619;<br>326620;<br>69386;<br>97122 | H4c1;<br>H4c11;<br>H4c12;<br>H4c14;<br>H4c2;<br>H4c3;<br>H4c4;<br>H4c6;<br>H4c8;<br>H4c9;<br>H4f16;<br>Hist1h4m | 0 | 1,21 | 7,41E-01 |
| Q9Z110        | 9  | 6 | 33,07 | 56454                                                                                                                                           | Aldh18a1                                                                                                        | 0 | 1,00 | 9,91E-01 |
| P30416        | 14 | 7 | 34,96 | 14228                                                                                                                                           | Fkbp4                                                                                                           | 0 | 1,09 | 9,57E-01 |
| A2A699        | 10 | 6 | 33,92 | 217219                                                                                                                                          | Fam171a<br>2                                                                                                    | 0 | 0,86 | 7,33E-01 |
| P63028        | 23 | 3 | 32,98 | 22070                                                                                                                                           | Tpt1                                                                                                            | 0 | 1,25 | 6,72E-01 |
| Q8VHK5        | 14 | 3 | 11,39 | 170790                                                                                                                                          | Mlc1                                                                                                            | 0 | 1,07 | 9,78E-01 |
| Q9CQI3        | 31 | 4 | 40,1  | 63985                                                                                                                                           | Gmfb                                                                                                            | 0 | 1,09 | 9,64E-01 |
| Q7TNR6        | 15 | 5 | 37,41 | 230868                                                                                                                                          | Igsf21                                                                                                          | 0 | 1,01 | 9,99E-01 |
| Q08189        | 5  | 3 | 44,86 | 21818                                                                                                                                           | Tgm3                                                                                                            | 0 | 0,87 | 7,90E-01 |
| P04925        | 13 | 3 | 46,34 | 19122                                                                                                                                           | Prnp                                                                                                            | 0 | 1,05 | 9,76E-01 |
| P61082        | 30 | 6 | 39,05 | 22192                                                                                                                                           | Ube2m                                                                                                           | 0 | 1,14 | 8,85E-01 |
| Q8CFE4        | 9  | 7 | 6,21  | 213326                                                                                                                                          | Scyl2                                                                                                           | 0 | 0,98 | 9,87E-01 |
| Q9WU79        | 11 | 4 | 24,59 | 19125                                                                                                                                           | Prodh                                                                                                           | 0 | 1,17 | 9,56E-01 |
| Q7TPM6        | 10 | 5 | 25,55 | 240121                                                                                                                                          | Fsd1                                                                                                            | 0 | 1,08 | 9,70E-01 |
| Q9JM96        | 13 | 4 | 16,54 | 56699                                                                                                                                           | Cdc42ep4                                                                                                        | 0 | 1,06 | 9,81E-01 |
| Q9Z1Z0        | 8  | 7 | 12,02 | 56041                                                                                                                                           | Uso1                                                                                                            | 0 | 1,17 | 8,21E-01 |
| Q8CHX7        | 12 | 4 | 25,76 | 74013                                                                                                                                           | Rftn2                                                                                                           | 0 | 0,76 | 5,96E-01 |
| P01942        | 33 | 3 | 34,52 |                                                                                                                                                 | Hba                                                                                                             | 1 | 0,82 | 6,42E-01 |
| O35316        | 10 | 4 | 52,69 | 21366                                                                                                                                           | Slc6a6                                                                                                          | 0 | 1,11 | 9,69E-01 |
| Q8R307        | 5  | 4 | 20,55 | 228545                                                                                                                                          | Vps18                                                                                                           | 0 | 1,10 | 9,76E-01 |
| P28661        | 14 | 5 | 76,01 | 18952                                                                                                                                           | Septin4                                                                                                         | 0 | 0,84 | 7,74E-01 |
| Q9JMC3        | 12 | 4 | 25,63 | 58233                                                                                                                                           | Dnaja4                                                                                                          | 0 | 1,01 | 1,00E+00 |

|             |    |   |        |        |         |   |      |          |
|-------------|----|---|--------|--------|---------|---|------|----------|
| P99026      | 20 | 4 | 58,26  | 19172  | Psmb4   | 0 | 1,18 | 7,77E-01 |
| Q9CZJ2      | 5  | 4 | 52,52  | 72630  | Hspa12b | 0 | 1,06 | 9,76E-01 |
| O35250      | 9  | 5 | 17,04  | 53413  | Exoc7   | 0 | 1,37 | 6,72E-01 |
| Q61616      | 12 | 4 | 14,81  | 13488  | Drd1    | 0 | 0,85 | 7,78E-01 |
| Q9D023      | 32 | 5 | 30,69  | 70456  | Mpc2    | 0 | 0,85 | 7,38E-01 |
| Q61335      | 22 | 5 | 35,35  | 27061  | Bcap31  | 0 | 1,09 | 9,56E-01 |
| P97411      | 12 | 5 | 12,98  | 15893  | Ica1    | 0 | 1,05 | 9,78E-01 |
| B9EJ86      | 14 | 8 | 8,17   | 237542 | Osbpl8  | 0 | 1,08 | 9,76E-01 |
| Q3URD3      | 9  | 7 | 9,37   | 83997  | Slmap   | 0 | 0,81 | 7,20E-01 |
| P97765      | 17 | 5 | 46,42  | 22378  | Wbp2    | 0 | 1,35 | 3,54E-01 |
| P70302      | 8  | 5 | 22,58  | 20866  | Stim1   | 0 | 1,07 | 9,76E-01 |
| O35304      | 8  | 4 | 30,38  |        | Slc18a3 | 0 | 1,13 | 9,56E-01 |
| P55264      | 17 | 6 | 17,96  | 11534  | Adk     | 0 | 0,77 | 4,12E-01 |
| Q9CZ30      | 14 | 5 | 32,29  | 67059  | Ola1    | 0 | 0,96 | 9,74E-01 |
| Q9CPU0      | 35 | 8 | 67,16  | 109801 | Glo1    | 0 | 0,97 | 9,76E-01 |
| G3X9C2      | 9  | 3 | 53,82  | 233038 | Nccrp1  | 0 | 1,08 | 9,74E-01 |
| Q9WVQ1      | 6  | 5 | 11,49  | 50791  | Magi2   | 0 | 1,05 | 9,85E-01 |
| P60122      | 23 | 7 | 14,61  | 56505  | Ruvbl1  | 0 | 1,22 | 8,53E-01 |
| Q61016      | 63 | 5 | 43,59  |        | Gng7    | 0 | 0,82 | 6,22E-01 |
| P24288      | 15 | 6 | 47,4   | 12035  | Bcat1   | 0 | 1,47 | 1,32E-01 |
| Q9D1E6      | 26 | 6 | 27,93  | 66411  | Tbcb    | 0 | 1,14 | 8,80E-01 |
| Q8BHE8      | 20 | 5 | 29,64  | 68115  | Maip1   | 0 | 0,92 | 9,33E-01 |
| O70251      | 16 | 3 | 26,03  | 55949  | Eef1b   | 0 | 0,81 | 7,50E-01 |
| Q0GA42      | 8  | 5 | 4      | 83674  | Cnm1    | 2 | 1,38 | 4,87E-01 |
| HBB_HUMAN   | 36 | 4 | 53,96  |        |         | 1 | 1,35 | 4,83E-01 |
| O55100      | 15 | 3 | 122,47 | 20972  | Syngr1  | 0 | 1,10 | 9,34E-01 |
| KRHB2_HUMAN | 12 | 2 | 13,27  |        |         | 0 | 0,78 | 8,50E-01 |
| P62774      | 33 | 3 | 23,99  | 14489  | Mtpn    | 0 | 1,13 | 9,13E-01 |
| Q6A4J8      | 6  | 6 | 15,33  | 252870 | Usp7    | 0 | 0,93 | 9,64E-01 |
| O35350      | 9  | 6 | 7,37   | 12333  | Capn1   | 0 | 0,84 | 8,78E-01 |
| Q3TDN2      | 16 | 5 | 13,92  | 76577  | Faf2    | 0 | 0,90 | 9,00E-01 |
| Q64674      | 21 | 6 | 25,56  | 20810  | Srm     | 0 | 0,84 | 7,33E-01 |
| P58321      | 27 | 4 | 8,34   | 93841  | Uchl4   | 0 | 0,94 | 9,76E-01 |
| Q9D387      | 11 | 3 | 60,25  | 76161  | Lamp5   | 0 | 1,03 | 9,96E-01 |
| Q9JKL5      | 28 | 5 | 11,56  | 57816  | Tesc    | 0 | 0,85 | 8,95E-01 |
| Q8BL86      | 27 | 7 | 21,69  | 72852  | Mblac2  | 0 | 1,30 | 5,10E-01 |
| Q9DC61      | 12 | 6 | 17,02  | 66865  | Pmpca   | 0 | 0,85 | 8,56E-01 |
| Q8CH72      | 10 | 5 | 27,61  | 69807  | Trim32  | 0 | 1,04 | 9,85E-01 |
| Q99M71      | 16 | 3 | 26,62  | 105298 | Epdr1   | 0 | 0,56 | 2,87E-02 |
| P60755      | 8  | 6 | 3,88   | 320772 | Mdga2   | 0 | 1,00 | 9,87E-01 |
| P52189      | 11 | 4 | 7,25   |        | Kcnj4   | 0 | 1,20 | 7,41E-01 |
| Q91XY4      | 6  | 4 | 23,94  | 93712  | Pcdhga4 | 0 | 1,33 | 3,99E-01 |
| Q8R050      | 8  | 6 | 30,61  | 14852  | Gspt1   | 0 | 1,23 | 7,61E-01 |
| Q6PNC0      | 3  | 7 | 5,77   | 240283 | Dmxl1   | 0 | 1,08 | 9,76E-01 |
| Q9DCM2      | 19 | 3 | 17,12  | 76263  | Gstk1   | 0 | 0,52 | 1,21E-01 |
| Q8K4Q0      | 5  | 5 | 20,92  |        | Rptor   | 0 | 1,26 | 8,85E-01 |

|           |    |   |       |        |          |   |      |          |
|-----------|----|---|-------|--------|----------|---|------|----------|
| Q9QZB1    | 23 | 4 | 34,51 | 58175  | Rgs20    | 1 | 0,95 | 9,61E-01 |
| Q9D7A8    | 13 | 5 | 37,88 | 74252  | Armc1    | 0 | 1,00 | 9,87E-01 |
| Q61037    | 6  | 8 | 0     |        | Tsc2     | 0 | 0,85 | 9,02E-01 |
| Q9JL8     | 16 | 5 | 6,43  | 71984  | Sars2    | 0 | 1,10 | 9,76E-01 |
| O70228    | 5  | 5 | 17,6  | 11981  | Atp9a    | 0 | 1,05 | 9,87E-01 |
| Q8JZN7    | 8  | 2 | 33,46 | 214952 | Rhot2    | 0 | 0,59 | 4,27E-01 |
| Q99LB6    | 18 | 4 | 21,24 | 108645 | Mat2b    | 0 | 1,00 | 9,96E-01 |
| P55096    | 13 | 6 | 5,68  | 19299  | Abcd3    | 0 | 1,13 | 9,28E-01 |
| Q68FD9    | 6  | 8 | 8,7   | 330286 | Kiaa1549 | 0 | 0,83 | 8,70E-01 |
| Q8BP92    | 8  | 4 | 30,02 | 26611  | Rcn2     | 0 | 0,47 | 4,61E-02 |
| Q3UHB8    | 6  | 4 | 11,55 | 380768 | Ccdc177  | 0 | 1,12 | 9,74E-01 |
| Q62348    | 20 | 4 | 18,12 | 22099  | Tsn      | 0 | 1,25 | 8,69E-01 |
| Q9D2M8    | 25 | 4 | 77,33 | 70620  | Ube2v2   | 0 | 1,06 | 9,74E-01 |
| Q9ESN4    | 16 | 3 | 25,38 | 227580 | C1ql3    | 0 | 1,01 | 1,00E+00 |
| A6H5Z3    | 7  | 5 | 32,48 | 75914  | Exoc6b   | 0 | 1,05 | 9,81E-01 |
| Q8BFP9    | 13 | 4 | 25,73 | 228026 | Pdk1     | 1 | 0,80 | 7,38E-01 |
| Q7M729    | 14 | 4 | 47,77 | 399548 | Scn4b    | 0 | 0,98 | 9,78E-01 |
| Q8BG92    | 14 | 2 | 39,09 | 215890 | Clvs2    | 0 | 0,76 | 7,90E-01 |
| Q8CGA0    | 11 | 4 | 16,97 | 68606  | Ppm1f    | 0 | 1,05 | 9,81E-01 |
| P53811    | 22 | 2 | 33,48 | 56305  | Pitpnb   | 0 | 0,65 | 6,13E-01 |
| Q9CPV9    | 15 | 5 | 25,78 | 70839  | P2ry12   | 0 | 0,40 | 1,45E-06 |
| Q9QYI5    | 16 | 5 | 31,5  | 56812  | Dnajb2   | 0 | 1,30 | 6,95E-01 |
| Q3UHD1    | 5  | 7 | 5,1   | 107831 | Adgrb1   | 0 | 0,85 | 7,52E-01 |
| P49813    | 17 | 5 | 12,87 | 21916  | Tmod1    | 0 | 0,76 | 7,49E-01 |
| P97384    | 12 | 5 | 27,38 | 11744  | Anxa11   | 0 | 0,77 | 6,64E-01 |
| P61750    | 16 | 2 | 50,65 | 11843  | Arf4     | 0 | 0,92 | 9,64E-01 |
| Q8R1S0    | 13 | 6 | 20,13 | 217707 | Coq6     | 0 | 0,50 | 4,72E-03 |
| Q3UPL0    | 6  | 6 | 16,8  | 69162  | Sec31a   | 0 | 1,10 | 9,64E-01 |
| CYC_HORSE | 26 | 5 | 26,96 |        | CYCS     | 0 | 0,83 | 6,29E-01 |
| Q9CZR8    | 14 | 2 | 33,31 | 66399  | Tsfm     | 0 | 0,72 | 6,44E-01 |
| Q5GH67    | 7  | 3 | 51,28 | 497097 | Xkr4     | 0 | 1,60 | 1,50E-01 |
| A2AWA9    | 6  | 5 | 11,51 | 227800 | Rabgap1  | 0 | 1,42 | 6,09E-01 |
| P10107    | 20 | 6 | 29,08 | 16952  | Anxa1    | 0 | 1,20 | 7,49E-01 |
| Q8BH57    | 11 | 6 | 14,4  | 67561  | Wdr48    | 0 | 1,16 | 8,43E-01 |
| Q61820    | 22 | 5 | 68,56 | 19428  | Rasl2-9  | 0 | 1,05 | 9,78E-01 |
| O08530    | 9  | 3 | 36,98 | 13609  | S1pr1    | 0 | 0,97 | 9,81E-01 |
| Q64442    | 17 | 6 | 14,2  | 20322  | Sord     | 0 | 1,06 | 9,76E-01 |
| P15626    | 16 | 2 | 80,47 | 14863  | Gstm2    | 0 | 1,17 | 8,21E-01 |
| Q91Z53    | 15 | 5 | 56,39 | 76238  | Grhpr    | 0 | 1,13 | 9,02E-01 |
| O08579    | 22 | 4 | 33,6  | 13726  | Emd      | 0 | 1,35 | 6,23E-01 |
| Q8CHK3    | 8  | 3 | 15,91 | 77582  | Mboat7   | 0 | 0,99 | 9,85E-01 |
| Q9CQR6    | 14 | 4 | 33,01 | 67857  | Ppp6c    | 0 | 1,04 | 9,89E-01 |
| Q9D3D9    | 14 | 2 | 72,52 | 66043  | Atp5fld  | 0 | 0,85 | 7,52E-01 |
| Q60780    | 14 | 5 | 6,18  |        | Gas7     | 0 | 1,13 | 9,19E-01 |
| Q6PF93    | 7  | 5 | 15,02 | 225326 | Pik3c3   | 0 | 1,03 | 9,96E-01 |
| Q5EBJ4    | 23 | 4 | 17,36 | 77767  | Ermn     | 0 | 0,85 | 8,94E-01 |

|        |    |   |       |        |           |   |      |          |
|--------|----|---|-------|--------|-----------|---|------|----------|
| Q05186 | 15 | 4 | 15,5  | 19672  | Rcn1      | 0 | 0,87 | 8,91E-01 |
| Q91Z61 | 22 | 4 | 24,48 | 208666 | Diras1    | 0 | 1,05 | 9,76E-01 |
| Q9WUL7 | 26 | 4 | 22,05 | 56350  | Arl3      | 0 | 1,27 | 7,42E-01 |
| Q9CX00 | 15 | 6 | 28,63 | 71955  | Ist1      | 0 | 0,92 | 9,07E-01 |
| B2RXS4 | 4  | 5 | 30,88 | 140570 | Plxnb2    | 0 | 0,81 | 8,40E-01 |
| P63143 | 13 | 3 | 38,48 | 16497  | Kcnab1    | 0 | 1,17 | 9,56E-01 |
| O88531 | 18 | 4 | 11,72 | 19063  | Ppt1      | 0 | 0,83 | 7,93E-01 |
| O35544 | 4  | 2 | 23,03 | 20513  | Slc1a6    | 0 | 0,91 | 9,00E-01 |
| Q91W89 | 8  | 7 | 14,69 | 73744  | Man2c1    | 0 | 0,92 | 9,68E-01 |
| Q5SV85 | 4  | 3 | 15,72 | 217030 | Synrg     | 0 | 0,93 | 9,76E-01 |
| Q9ERR1 | 14 | 4 | 37,32 | 83431  | Ndel1     | 0 | 1,01 | 1,00E+00 |
| Q6PDS3 | 8  | 5 | 17,92 | 237868 | Sarm1     | 0 | 1,03 | 9,97E-01 |
| Q61176 | 9  | 3 | 53,1  | 11846  | Arg1      | 0 | 1,07 | 9,74E-01 |
| P23927 | 31 | 5 | 21,04 | 12955  | Cryab     | 0 | 0,76 | 7,49E-01 |
| Q9JIV5 | 16 | 2 | 12,84 | 54376  | Cacng3    | 0 | 1,27 | 8,86E-01 |
| Q9QYF1 | 14 | 4 | 24,57 | 17252  | Rdh11     | 0 | 0,81 | 8,10E-01 |
| P97494 | 11 | 5 | 14,71 | 14629  | Gelc      | 0 | 0,81 | 7,90E-01 |
| Q8K4X7 | 16 | 6 | 17,24 | 68262  | Agpat4    | 0 | 1,38 | 5,13E-01 |
| P70429 | 18 | 5 | 16,61 | 14026  | Evl       | 0 | 0,43 | 1,05E-02 |
| Q9QXJ1 | 8  | 4 | 13,97 | 11785  | Apbb1     | 0 | 1,06 | 9,81E-01 |
| Q921J2 | 19 | 5 | 20,42 | 19744  | Rheb      | 0 | 1,53 | 9,64E-02 |
| Q8CI32 | 12 | 4 | 18,86 | 70369  | Bag5      | 0 | 1,11 | 9,69E-01 |
| P20152 | 12 | 2 | 82,1  | 22352  | Vim       | 0 | 0,95 | 9,78E-01 |
| P29391 | 42 | 5 | 9,1   |        | Ftl1      | 0 | 0,98 | 9,85E-01 |
| Q9D8B4 | 21 | 3 | 27,5  |        | Ndufa11   | 0 | 0,74 | 6,55E-01 |
| P62908 | 23 | 5 | 32,74 | 27050  | Rps3      | 0 | 0,79 | 7,33E-01 |
| Q3TES0 | 5  | 4 | 11,95 | 243621 | Iqsec3    | 0 | 1,11 | 9,76E-01 |
| Q8VE47 | 10 | 3 | 16,62 | 66663  | Uba5      | 0 | 1,08 | 9,76E-01 |
| P12815 | 23 | 4 | 39,71 | 18570  | Pdcd6     | 0 | 0,89 | 9,17E-01 |
| G3XA57 | 13 | 5 | 10,05 | 74998  | Rab11fip2 | 0 | 1,41 | 6,59E-01 |
| Q61655 | 11 | 5 | 15,54 | 13680  | Ddx19a    | 0 | 0,88 | 9,34E-01 |
| Q4VAE3 | 22 | 5 | 38,48 | 74868  | Tmem65    | 0 | 0,98 | 9,76E-01 |
| Q924M7 | 8  | 2 | 15,8  | 110119 | Mpi       | 0 | 0,94 | 9,76E-01 |
| Q99LD8 | 26 | 5 | 18,75 | 51793  | Ddah2     | 0 | 0,83 | 7,81E-01 |
| Q9CXW2 | 15 | 5 | 11,68 | 64655  | Mrps22    | 0 | 0,76 | 7,42E-01 |
| P34884 | 24 | 3 | 66,22 | 17319  | Mif       | 0 | 0,92 | 9,12E-01 |
| Q3THE2 | 24 | 4 | 27,65 | 67938  | Myl12b    | 0 | 1,04 | 9,89E-01 |
| Q5RJI5 | 7  | 3 | 19,63 | 381979 | Brsk1     | 0 | 0,94 | 9,76E-01 |
| Q8BXZ1 | 11 | 5 | 22,78 | 67988  | Tmx3      | 0 | 0,79 | 4,92E-01 |
| Q9R1P1 | 18 | 3 | 19,91 | 26446  | Psmb3     | 0 | 1,06 | 9,76E-01 |
| Q9ER88 | 16 | 5 | 8,22  | 65111  | Dap3      | 0 | 0,60 | 2,63E-01 |
| O88456 | 19 | 3 | 19,04 | 12336  | Capns1    | 2 | 0,88 | 8,54E-01 |
| Q6ZQI3 | 14 | 4 | 29,73 | 109154 | Mlec      | 0 | 1,19 | 8,70E-01 |
| Q9R0D8 | 23 | 5 | 8,35  | 75659  | Wdr54     | 0 | 1,05 | 9,96E-01 |
| Q3URS9 | 13 | 4 | 7,03  | 66658  | Ccdc51    | 0 | 0,90 | 9,56E-01 |
| Q8BI08 | 18 | 2 | 52,32 | 105853 | Mal2      | 0 | 1,08 | 9,59E-01 |

|        |    |   |       |        |          |   |      |          |
|--------|----|---|-------|--------|----------|---|------|----------|
| Q8BZ81 | 10 | 4 | 17,42 | 216028 | Lrrtm3   | 1 | 0,98 | 9,78E-01 |
| Q9Z0N1 | 9  | 3 | 13,62 | 26905  | Eif2s3x  | 0 | 1,95 | 2,86E-01 |
| Q9CQ69 | 37 | 3 | 49,23 | 22272  | Uqcrq    | 0 | 0,91 | 9,05E-01 |
| P53986 | 12 | 4 | 40,79 | 20501  | Slc16a1  | 0 | 1,12 | 9,21E-01 |
| Q6PAR5 | 5  | 7 | 1,89  | 66691  | Gapvd1   | 0 | 1,05 | 9,76E-01 |
| O35226 | 14 | 3 | 20,11 | 19185  | Psmd4    | 0 | 1,05 | 9,96E-01 |
| P32211 | 11 | 2 | 22,81 | 12672  | Chrm4    | 0 | 0,72 | 3,52E-01 |
| Q60771 | 11 | 2 | 8,91  | 18417  | Cldn11   | 0 | 1,03 | 9,94E-01 |
| Q8R2Y0 | 15 | 4 | 18,79 | 66082  | Abhd6    | 0 | 1,01 | 1,00E+00 |
| O55033 | 14 | 4 | 12,74 | 17974  | Nck2     | 1 | 0,99 | 9,87E-01 |
| Q80U49 | 5  | 4 | 1,84  | 217882 | Cep170b  | 0 | 1,55 | 5,86E-01 |
| Q99LP6 | 22 | 4 | 17,31 | 17713  | Grpel1   | 0 | 0,69 | 5,00E-01 |
| O08919 | 9  | 3 | 42,54 | 18223  | Numbl    | 1 | 0,79 | 5,56E-01 |
| Q9D6Y9 | 8  | 5 | 32,89 | 74185  | Gbe1     | 0 | 1,61 | 1,08E-01 |
| Q9DCS3 | 12 | 5 | 5,21  | 26922  | Mecr     | 0 | 1,08 | 9,74E-01 |
| Q9D4J1 | 9  | 2 | 21,03 | 98363  | Efhd1    | 0 | 0,79 | 4,86E-01 |
| P58774 | 12 | 5 | 38,6  | 22004  | Tpm2     | 0 | 1,83 | 1,83E-03 |
| Q9R0Q7 | 19 | 4 | 31,53 | 56351  | Ptges3   | 0 | 0,89 | 8,78E-01 |
| Q149F3 | 7  | 5 | 21,01 | 14853  | Gspt2    | 0 | 0,94 | 9,74E-01 |
| Q3TYD6 | 5  | 6 | 5,16  | 231876 | Lmtk2    | 0 | 1,08 | 9,76E-01 |
| Q9JM14 | 22 | 3 | 24,55 | 50773  | Nt5c     | 0 | 1,24 | 9,03E-01 |
| Q60673 | 4  | 2 | 16,11 |        | Ptpn     | 0 | 1,07 | 9,76E-01 |
| O54984 | 16 | 5 | 38,26 | 56495  | Get3     | 0 | 1,22 | 7,20E-01 |
| P50136 | 10 | 3 | 21,33 |        | Bckdha   | 0 | 0,54 | 8,64E-02 |
| P10605 | 15 | 4 | 14,28 | 13030  | Ctsb     | 0 | 0,54 | 5,41E-02 |
| Q8BWG8 | 13 | 5 | 15,56 | 109689 | Arrb1    | 0 | 1,09 | 9,70E-01 |
| P70202 | 18 | 3 | 67,79 | 17035  | Lxn      | 0 | 0,84 | 7,09E-01 |
| Q9QUR8 | 6  | 3 | 13,08 | 20361  | Sema7a   | 0 | 1,24 | 9,02E-01 |
| Q3V0K9 | 6  | 2 | 35,55 | 102502 | Pls1     | 0 | 0,91 | 9,18E-01 |
| Q63836 | 14 | 6 | 6,89  | 20342  | Selenbp2 | 0 | 0,73 | 1,89E-01 |
| P17563 | 14 | 6 | 6,89  | 20341  | Selenbp1 | 0 | 0,73 | 1,89E-01 |
| Q8BNY6 | 23 | 4 | 27,6  | 14299  | Ncs1     | 0 | 0,85 | 6,94E-01 |
| Q9CXR1 | 15 | 5 | 23,68 | 66375  | Dhrs7    | 0 | 1,11 | 9,40E-01 |
| Q9CQF9 | 10 | 3 | 25,9  | 66881  | Pcyox1   | 0 | 1,19 | 9,25E-01 |
| Q9D0S9 | 34 | 4 | 34,72 | 68917  | Hint2    | 0 | 0,82 | 8,11E-01 |
| Q8BG67 | 6  | 3 | 36,85 | 76740  | Efr3a    | 0 | 0,83 | 9,13E-01 |
| Q8C561 | 7  | 4 | 19,53 | 320506 | Lmbrd2   | 0 | 1,12 | 9,62E-01 |
| P22315 | 15 | 5 | 11,78 |        | Fech     | 0 | 0,66 | 1,88E-01 |
| P57716 | 7  | 5 | 19,62 | 59287  | Nestn    | 0 | 0,70 | 4,20E-01 |
| Q9Z2Z6 | 16 | 5 | 42,76 | 57279  | Slc25a20 | 0 | 0,95 | 9,56E-01 |
| P49722 | 17 | 3 | 39,65 | 19166  | Psma2    | 0 | 1,01 | 1,00E+00 |
| P53612 | 12 | 4 | 22,13 | 19352  | Rabggtb  | 0 | 0,94 | 9,56E-01 |
| Q8K4L4 | 9  | 5 | 7,34  | 69693  | Pof1b    | 0 | 2,39 | 1,19E-02 |
| P04627 | 9  | 3 | 30,97 | 11836  | Araf     | 0 | 0,81 | 8,07E-01 |
| Q6P069 | 23 | 5 | 27,86 | 109552 | Sri      | 0 | 1,26 | 6,12E-01 |
| Q9DBL7 | 12 | 5 | 27,03 | 71743  | Coasy    | 0 | 0,94 | 9,74E-01 |
| P61087 | 24 | 4 | 5,99  | 53323  | Ube2k    | 0 | 0,89 | 9,42E-01 |

|        |    |   |       |        |         |   |      |          |
|--------|----|---|-------|--------|---------|---|------|----------|
| P35288 | 19 | 4 | 23,11 |        | Rab23   | 0 | 1,13 | 9,12E-01 |
| Q99KP3 | 12 | 3 | 15,66 | 68631  | Cryl1   | 0 | 0,93 | 9,76E-01 |
| Q8VED9 | 25 | 4 | 53,61 | 216551 | Lgalsl  | 0 | 1,21 | 7,33E-01 |
| Q9WUD1 | 15 | 4 | 17,07 | 56424  | Stub1   | 0 | 0,81 | 8,45E-01 |
| Q9WU65 | 9  | 4 | 26,54 | 14626  | Gk2     | 0 | 0,86 | 7,74E-01 |
| Q9Z2A0 | 12 | 5 | 4,19  | 18607  | Pdpk1   | 0 | 1,13 | 9,56E-01 |
| Q9D1X0 | 18 | 3 | 4,14  | 78688  | Nol3    | 0 | 1,69 | 5,99E-01 |
| Q62167 | 8  | 5 | 11,47 | 13205  | Ddx3x   | 0 | 1,06 | 9,87E-01 |
| P16381 | 8  | 5 | 11,47 | 110957 | D1Pas1  | 0 | 1,06 | 9,87E-01 |
| Q9CQC9 | 21 | 4 | 24,77 | 66397  | Sar1b   | 0 | 1,14 | 9,02E-01 |
| Q8VBW6 | 8  | 4 | 29,84 | 234664 | Nae1    | 0 | 1,07 | 9,78E-01 |
| Q9Z2I8 | 12 | 4 | 15,6  | 20917  | Suclg2  | 0 | 0,74 | 6,94E-01 |
| Q9D0R2 | 9  | 5 | 13,26 | 110960 | Tars1   | 1 | 0,85 | 8,50E-01 |
| P70227 | 2  | 6 | 1,68  | 16440  | Itpr3   | 0 | 1,13 | 9,34E-01 |
| Q60996 | 10 | 3 | 16,57 | 26931  | Ppp2r5c | 0 | 0,95 | 9,76E-01 |
| Q8CAK1 | 10 | 3 | 21,89 | 216792 | Iba57   | 0 | 0,58 | 2,16E-01 |
| P58242 | 12 | 4 | 18,24 | 100340 | Smpdl3b | 0 | 0,84 | 8,72E-01 |
| Q9Z0H8 | 5  | 5 | 7,1   | 269713 | Clip2   | 0 | 1,23 | 9,12E-01 |
| Q99M87 | 8  | 3 | 18,89 | 83945  | Dnaja3  | 0 | 0,93 | 9,72E-01 |
| P11438 | 6  | 2 | 34,23 | 16783  | Lamp1   | 0 | 0,79 | 5,01E-01 |
| O55026 | 10 | 4 | 31,82 | 12496  | Entpd2  | 0 | 0,88 | 8,57E-01 |
| Q8VD26 | 12 | 3 | 13,83 | 70209  | Tmem143 | 0 | 0,95 | 9,76E-01 |
| Q9EQQ9 | 6  | 5 | 3,27  | 76055  | Oga     | 0 | 1,70 | 1,18E-01 |
| Q8CBH5 | 10 | 5 | 5,69  | 98682  | Mfsd6   | 0 | 2,25 | 5,92E-02 |
| P26883 | 26 | 2 | 51,9  | 14225  | Fkbp1a  | 0 | 0,98 | 9,76E-01 |
| Q3UUQ7 | 5  | 5 | 10,03 | 241062 | Pgap1   | 0 | 0,93 | 9,66E-01 |
| P20060 | 9  | 4 | 18,12 | 15212  | Hexb    | 0 | 0,64 | 5,56E-02 |
| Q9QZ88 | 23 | 4 | 42,54 | 56433  | Vps29   | 0 | 1,20 | 7,89E-01 |
| Q8BM13 | 11 | 5 | 22,67 | 244723 | Olfm2   | 0 | 0,88 | 8,64E-01 |
| Q64737 | 7  | 6 | 13,79 | 14450  | Gart    | 0 | 1,24 | 7,51E-01 |
| Q6P8J7 | 6  | 2 | 25,74 | 76722  | Ckmt2   | 0 | 0,68 | 8,19E-02 |
| Q3TIR3 | 11 | 4 | 9,13  | 101489 | Ric8a   | 0 | 0,84 | 9,25E-01 |
| Q9CXT8 | 10 | 4 | 50,99 | 73078  | Pmpcb   | 0 | 0,72 | 6,13E-01 |
| Q8R3P0 | 12 | 3 | 6,23  | 11484  | Aspa    | 0 | 0,66 | 4,00E-01 |
| Q91Z67 | 4  | 4 | 27,23 | 14270  | Srgap2  | 0 | 1,01 | 1,00E+00 |
| Q91XU3 | 9  | 3 | 21,4  | 117150 | Pip4k2c | 0 | 1,15 | 9,70E-01 |
| Q9QZI8 | 5  | 2 | 28,45 | 56442  | Serinc1 | 0 | 0,65 | 3,83E-01 |
| Q9CQ75 | 30 | 3 | 17,51 | 17991  | Ndufa2  | 0 | 1,24 | 7,52E-01 |
| B2RQC6 | 4  | 7 | 1,78  | 69719  | Cad     | 0 | 1,31 | 8,10E-01 |
| P70195 | 19 | 5 | 41,48 | 19177  | Psmb7   | 0 | 0,81 | 6,23E-01 |
| Q99MR3 | 7  | 5 | 7,52  | 83704  | Slc12a9 | 0 | 0,93 | 9,74E-01 |
| Q6ZQK5 | 7  | 4 | 7,43  | 78618  | Acap2   | 0 | 0,55 | 3,33E-01 |
| A2APV2 | 7  | 6 | 1,64  | 71409  | Fmnl2   | 0 | 0,99 | 9,96E-01 |
| Q60738 | 11 | 4 | 31,41 | 22782  | Slc30a1 | 0 | 0,98 | 9,87E-01 |
| Q99KQ4 | 11 | 4 | 5,82  | 59027  | Nampt   | 0 | 1,33 | 8,10E-01 |
| Q8BGN8 | 10 | 3 | 13,9  | 72003  | Synpr   | 0 | 0,79 | 5,77E-01 |
| P54923 | 20 | 5 | 4,02  | 11544  | Adprh   | 0 | 1,28 | 8,53E-01 |

|            |    |   |       |                                   |          |   |      |          |
|------------|----|---|-------|-----------------------------------|----------|---|------|----------|
| Q9QZ08     | 17 | 5 | 19,86 | 56174                             | Nagk     | 0 | 1,32 | 5,82E-01 |
| Q8VBT0     | 12 | 4 | 25,13 | 72736                             | Tmx1     | 0 | 1,07 | 9,85E-01 |
| Q8R555     | 9  | 5 | 9,61  | 72832                             | Crtac1   | 0 | 1,02 | 9,94E-01 |
| Q8BK08     | 23 | 4 | 28,45 | 216821                            | Tmem11   | 0 | 0,98 | 9,76E-01 |
| Q3TC33     | 15 | 4 | 33,78 | 67433                             | Ccdc127  | 0 | 0,85 | 7,42E-01 |
| Q8K0D5     | 7  | 5 | 16,3  | 28030                             | Gfm1     | 0 | 0,63 | 1,50E-01 |
| Q9EQ06     | 14 | 5 | 16,54 | 114664                            | Hsd17b11 | 0 | 0,86 | 8,82E-01 |
| P46935     | 7  | 4 | 14,58 | 17999                             | Nedd4    | 0 | 1,43 | 7,10E-01 |
| Q9QZB7     | 13 | 5 | 18,88 | 56444                             | Actr10   | 0 | 1,07 | 9,74E-01 |
| Q8BMS4     | 9  | 2 | 15,97 | 230027                            | Coq3     | 0 | 0,50 | 1,24E-01 |
| Q8BHW2     | 13 | 5 | 15,31 | 230751                            | Oscp1    | 0 | 0,90 | 9,32E-01 |
| P51855     | 12 | 5 | 19,99 | 14854                             | Gss      | 0 | 1,00 | 9,97E-01 |
| Q99J09     | 15 | 4 | 13,06 | 70465                             | Wdr77    | 0 | 1,05 | 9,85E-01 |
| Q9QZD8     | 20 | 5 | 13,02 | 27376                             | Slc25a10 | 0 | 0,92 | 9,53E-01 |
| O55013     | 23 | 5 | 26,77 | 27096                             | Trappc3  | 0 | 1,48 | 2,33E-01 |
| Q9R0N0     | 14 | 5 | 13,91 | 14635                             | Galk1    | 0 | 1,01 | 1,00E+00 |
| Q8VE70     | 24 | 6 | 21,05 | 56426                             | Pdcd10   | 0 | 0,80 | 5,42E-01 |
| O55017     | 2  | 5 | 11,04 | 12287                             | Cacna1b  | 0 | 1,26 | 7,77E-01 |
| Q8R4N0     | 15 | 4 | 12,48 | 69634                             | Clybl    | 0 | 1,32 | 7,77E-01 |
| Q99J83     | 12 | 3 | 18,25 | 11793                             | Atg5     | 0 | 1,08 | 9,76E-01 |
| Q80XK6     | 3  | 6 | 1,74  | 76559                             | Atg2b    | 0 | 1,01 | 9,94E-01 |
| Q9D6P8     | 25 | 4 | 42,87 | 70405                             | Calml3   | 0 | 0,99 | 9,77E-01 |
| Q9CX56     | 14 | 6 | 18,09 | 57296                             | Psmd8    | 0 | 1,03 | 9,85E-01 |
| Q9CZW4     | 8  | 4 | 10,91 | 74205                             | Acsl3    | 0 | 1,27 | 8,44E-01 |
| Q8BMF3     | 8  | 5 | 24,72 | 109264                            | Me3      | 1 | 0,97 | 9,76E-01 |
| Q8BZN6     | 3  | 6 | 1,67  | 210293                            | Dock10   | 0 | 0,87 | 9,47E-01 |
| Q3TY86     | 8  | 5 | 14,89 | 72168                             | Aifm3    | 0 | 1,06 | 9,78E-01 |
| Q8BFY9     | 6  | 2 | 7,5   | 238799                            | Tnpo1    | 2 | 0,85 | 9,32E-01 |
| Q9R0M0     | 2  | 6 | 1,89  | 53883                             | Celsr2   | 0 | 0,65 | 4,52E-01 |
| P42567     | 8  | 5 | 2     | 13858                             | Eps15    | 0 | 1,26 | 8,50E-01 |
| Q8BHK2     | 29 | 4 | 27,09 | 235281                            | Scn3b    | 0 | 1,44 | 4,49E-01 |
| P63115     | 8  | 2 | 13,84 | 53896                             | Slc7a10  | 0 | 0,71 | 6,42E-01 |
| Q9JKV1     | 11 | 4 | 24,19 | 56436                             | Adrm1    | 0 | 1,16 | 8,88E-01 |
| LYSC_HUMAN | 18 | 3 | 34,57 | 100970<br>943;<br>4069;<br>450190 | LYZ      | 0 | 1,50 | 7,84E-02 |
| Q8BGD9     | 7  | 4 | 5,13  | 75705                             | Eif4b    | 0 | 1,19 | 9,16E-01 |
| Q99KK9     | 10 | 2 | 43,13 | 70791                             | Hars2    | 0 | 0,01 | 1,60E-16 |
| Q922P8     | 7  | 5 | 12,88 | 98170                             | Tmem132a | 0 | 0,96 | 9,76E-01 |
| Q8VD33     | 13 | 3 | 27,35 | 218544                            | Sgtb     | 0 | 1,20 | 9,16E-01 |
| Q60605     | 30 | 4 | 9,41  | 17904                             | Myl6     | 0 | 0,97 | 9,76E-01 |
| Q8C0L0     | 13 | 3 | 30,43 | 52837                             | Tmx4     | 0 | 0,96 | 9,76E-01 |
| P00397     | 4  | 2 | 33,66 | 17708                             | Mtco1    | 0 | 1,43 | 2,03E-01 |
| Q3TC72     | 16 | 6 | 33,13 | 68126                             | Fahd2    | 0 | 0,81 | 6,58E-01 |
| Q8R164     | 14 | 4 | 22    | 68021                             | Bphl     | 0 | 0,77 | 6,07E-01 |
| Q9CRD2     | 12 | 3 | 19,99 | 66736                             | Emc2     | 0 | 0,80 | 8,21E-01 |

|            |    |   |       |           |          |   |      |          |
|------------|----|---|-------|-----------|----------|---|------|----------|
| P06801     | 8  | 4 | 10,76 | 17436     | Me1      | 0 | 1,02 | 1,00E+00 |
| O88983     | 22 | 5 | 5,96  | 55943     | Stx8     | 0 | 0,86 | 7,77E-01 |
| Q99LY9     | 49 | 5 | 15,91 | 595136    | Ndufs5   | 0 | 0,72 | 1,88E-01 |
| Q80TY0     | 7  | 5 | 9,72  | 14269     | Fnbp1    | 0 | 1,10 | 9,70E-01 |
| Q66JS6     | 16 | 4 | 16,52 | 100042807 | Eif3j2   | 0 | 0,96 | 9,76E-01 |
| Q3UGC7     | 16 | 4 | 16,52 | 78655     | Eif3j1   | 0 | 0,96 | 9,76E-01 |
| Q8WTY4     | 16 | 3 | 9,03  | 109006    | Ciapi1   | 0 | 1,37 | 7,77E-01 |
| Q91V64     | 12 | 3 | 17,45 | 66307     | Isoc1    | 0 | 1,56 | 5,58E-01 |
| Q9CZ04     | 14 | 3 | 9,11  | 26894     | Cops7a   | 0 | 1,47 | 6,06E-01 |
| Q9EPW0     | 5  | 5 | 9,14  | 269180    | Inpp4a   | 0 | 0,97 | 9,76E-01 |
| Q60692     | 13 | 3 | 72,96 | 19175     | Psmb6    | 0 | 1,28 | 5,13E-01 |
| Q9D358     | 24 | 3 | 41,47 | 11431     | Acp1     | 0 | 1,20 | 7,61E-01 |
| Q9D3D0     | 15 | 4 | 10,13 | 76080     | Ttpal    | 0 | 1,26 | 8,60E-01 |
| Q8R5H1     | 4  | 3 | 24,06 | 14479     | Usp15    | 0 | 1,12 | 9,76E-01 |
| O88507     | 6  | 2 | 34,78 | 12804     | Cntfr    | 0 | 0,86 | 8,10E-01 |
| Q8BFU3     | 9  | 4 | 16,2  | 235315    | Rnf214   | 0 | 0,87 | 9,25E-01 |
| P97371     | 19 | 5 | 11,49 | 19186     | Psmc1    | 0 | 1,44 | 5,62E-01 |
| Q5HZI9     | 21 | 6 | 11,56 | 230125    | Slc25a51 | 0 | 1,18 | 9,11E-01 |
| Q9JKC8     | 10 | 2 | 35,86 | 55946     | Ap3m1    | 0 | 0,55 | 4,06E-01 |
| Q8K411     | 5  | 4 | 1,98  | 69617     | Pitrm1   | 0 | 0,99 | 9,91E-01 |
| Q9WTS6     | 2  | 4 | 3,34  |           | Tenm3    | 0 | 1,05 | 9,97E-01 |
| Q7TPD3     | 5  | 6 | 4,97  |           | Robo2    | 0 | 1,05 | 9,78E-01 |
| Q9CPP6     | 28 | 3 | 32,04 | 68202     | Ndufa5   | 0 | 0,89 | 8,91E-01 |
| CASK_BOVIN | 21 | 3 | 7,52  | 281728    | CSN3     | 0 | 0,76 | 6,23E-01 |
| O35405     | 6  | 3 | 65,4  | 18807     | Pld3     | 0 | 0,76 | 3,50E-01 |
| Q99K70     | 15 | 4 | 5,57  | 54170     | Rragc    | 0 | 1,14 | 8,85E-01 |
| Q8K1N1     | 9  | 6 | 9,72  | 67452     | Pnpla8   | 0 | 0,66 | 3,84E-01 |
| Q8BT60     | 11 | 3 | 27,29 | 70568     | Cpne3    | 0 | 2,11 | 2,01E-01 |
| Q505D7     | 20 | 2 | 28,56 | 403187    | Opa3     | 1 | 0,85 | 7,79E-01 |
| Q03141     | 6  | 2 | 15,12 | 17169     | Mark3    | 0 | 1,04 | 9,91E-01 |
| Q69ZH9     | 6  | 5 | 9,91  | 58996     | Arhgap23 | 1 | 1,12 | 9,74E-01 |
| Q8VCX5     | 10 | 4 | 14,31 | 216001    | Micu1    | 0 | 0,51 | 4,45E-02 |
| P55821     | 21 | 2 | 52,3  | 20257     | Stmn2    | 0 | 1,50 | 5,79E-01 |
| Q9CR67     | 13 | 3 | 37,01 | 67878     | Tmem33   | 0 | 1,35 | 3,83E-01 |
| Q9QZ23     | 20 | 4 | 19,76 | 56748     | Nful     | 0 | 0,86 | 8,86E-01 |
| Q9D1H7     | 10 | 3 | 15,32 | 67604     | Get4     | 0 | 0,00 | 1,60E-16 |
| Q78IK2     | 47 | 3 | 11,38 | 66477     | Atp5md   | 0 | 0,78 | 3,87E-01 |
| Q9Z1T1     | 4  | 6 | 31,76 | 11774     | Ap3b1    | 0 | 0,98 | 9,76E-01 |
| Q6PA06     | 8  | 3 | 10,7  | 56298     | Atl2     | 0 | 0,81 | 7,71E-01 |
| Q8BSZ2     | 21 | 4 | 4,28  | 11778     | Ap3s2    | 0 | 1,15 | 8,77E-01 |
| O35593     | 16 | 4 | 33,14 | 59029     | Psmd14   | 0 | 1,03 | 9,99E-01 |
| Q3UU96     | 3  | 2 | 10,03 | 226751    | Cdc42bpa | 0 | 0,93 | 9,76E-01 |
| O89051     | 14 | 3 | 31,08 | 16432     | Itm2b    | 0 | 0,82 | 6,70E-01 |
| B2RXC1     | 4  | 4 | 6,36  | 320714    | Trappc11 | 0 | 1,19 | 8,91E-01 |
| Q922J3     | 4  | 5 | 0     | 56430     | Clip1    | 0 | 1,30 | 8,24E-01 |
| Q9EPK2     | 11 | 4 | 21,51 | 19889     | Rp2      | 0 | 0,98 | 9,79E-01 |



|                 |    |   |       |                     |                           |   |       |          |
|-----------------|----|---|-------|---------------------|---------------------------|---|-------|----------|
| P02089          | 21 | 2 | 70,19 | 15130               | Hbb-b2                    | 0 | 1,10  | 9,56E-01 |
| P49446          | 7  | 4 | 20,16 | 19267               | Ptpre                     | 0 | 0,83  | 6,94E-01 |
| P24472          | 22 | 5 | 42,65 | 14860               | Gsta4                     | 0 | 0,99  | 9,76E-01 |
| Q99KW9          | 8  | 4 | 19,96 | 71927               | Itfg1                     | 0 | 1,32  | 6,98E-01 |
| O08989          | 29 | 5 | 5,64  | 17532               | Mras                      | 0 | 1,18  | 8,59E-01 |
| Q9CRY7          | 14 | 4 | 14,61 | 66569               | Gdpd1                     | 0 | 1,51  | 3,12E-01 |
| Q9JKF6          | 8  | 3 | 21,05 | 58235               | Nectin1                   | 0 | 0,88  | 9,02E-01 |
| Q8BWM0          | 10 | 3 | 16,23 | 96979               | Ptges2                    | 0 | 1,10  | 9,76E-01 |
| P97772          | 4  | 5 | 5,01  | 14816               | Grm1                      | 0 | 0,84  | 8,25E-01 |
| Q8BH58          | 18 | 4 | 13,79 | 226591              | Tipr1                     | 0 | 0,92  | 9,56E-01 |
| Q9WTM5          | 9  | 4 | 21,96 | 20174               | Ruvbl2                    | 0 | 1,19  | 8,25E-01 |
| Q9CQT1          | 11 | 3 | 25,27 | 67873               | Mri1                      | 0 | 1,53  | 5,91E-01 |
| Q80TA1          | 5  | 2 | 13,65 | 28042               | Selenoi                   | 0 | 0,83  | 9,05E-01 |
| Q9JIV4          | 17 | 5 | 6,85  | 54377               | Cacng4                    | 0 | 1,04  | 9,78E-01 |
| Q9DCJ1          | 13 | 3 | 13,78 | 56716               | Mlst8                     | 0 | 1,13  | 9,64E-01 |
| Q922R1          | 10 | 4 | 7,66  |                     |                           | 0 | 1,67  | 2,64E-01 |
| O08759          | 6  | 4 | 21,53 | 22215               | Ube3a                     | 0 | 1,16  | 9,40E-01 |
| Q9CQ22          | 22 | 3 | 18,53 | 66508               | Lamtor1                   | 0 | 0,80  | 7,52E-01 |
| P63242          | 25 | 5 | 9,83  | 276770              | Eif5a                     | 0 | 0,90  | 9,29E-01 |
| Q60803          | 8  | 4 | 8,91  | 22031               | Traf3                     | 0 | 0,94  | 9,76E-01 |
| Q8BHK1          | 14 | 3 | 6,62  | 233280              | Nipa1                     | 0 | 0,92  | 9,76E-01 |
| Q61205          | 17 | 3 | 15,03 | 18476               | Pafah1b3                  | 0 | 1,23  | 8,21E-01 |
| Q9JHU9          | 10 | 5 | 10,15 | 71780               | Isyna1                    | 0 | 1,38  | 6,15E-01 |
| Q58A65          | 3  | 4 | 23,5  | 70834               | Spag9                     | 0 | 1,17  | 8,76E-01 |
| Q05816          | 30 | 5 | 27,21 | 16592               | Fabp5                     | 0 | 0,90  | 8,88E-01 |
| P28867          | 5  | 3 | 22,66 | 18753               | Prkcd                     | 0 | 0,72  | 6,61E-01 |
| Q99PS0          | 7  | 2 | 27,69 | 94179               | Krt23                     | 0 | 1,76  | 7,67E-02 |
| AMYS_H<br>UMAN  | 7  | 3 | 8,31  | 276;<br>277;<br>278 | AMY1A;<br>AMY1B;<br>AMY1C | 0 | 1,67  | 3,99E-01 |
| Q921Q7          | 7  | 4 | 9,06  | 225870              | Rin1                      | 0 | 1,09  | 9,78E-01 |
| P17809          | 9  | 4 | 26,56 | 20525               | Slc2a1                    | 0 | 0,74  | 3,90E-01 |
| Q64704          | 14 | 4 | 3,24  | 20908               | Stx3                      | 0 | 1,41  | 7,33E-01 |
| CAH2_HU<br>MAN  | 11 | 2 | 4,95  |                     |                           | 0 | 28,98 | 1,60E-16 |
| Q52KR3          | 2  | 4 | 21,96 | 353211              | Prune2                    | 0 | 1,22  | 8,70E-01 |
| Q9WVA4          | 11 | 2 | 64,29 | 21346               | Tagln2                    | 0 | 2,01  | 7,01E-05 |
| P59823          | 7  | 4 | 9,9   |                     | Il1rap11                  | 0 | 0,78  | 8,42E-01 |
| Q9WUR2          | 10 | 3 | 15,29 | 23986               | Eci2                      | 0 | 0,86  | 9,16E-01 |
| Q62095          | 6  | 4 | 9,36  | 26900               | Ddx3y                     | 0 | 0,95  | 9,76E-01 |
| FABPH_H<br>UMAN | 30 | 4 | 42,69 |                     |                           | 0 | 1,13  | 8,76E-01 |
| P63073          | 20 | 4 | 1,71  | 13684               | Eif4e                     | 0 | 1,05  | 9,88E-01 |
| P47941          | 17 | 3 | 3,6   | 12929               | Crkl                      | 0 | 1,02  | 1,00E+00 |
| Q9R0H0          | 6  | 3 | 19,38 | 11430               | Acox1                     | 0 | 0,85  | 8,91E-01 |
| P70670          | 1  | 2 | 5,93  | 17938               | Naca                      | 0 | 1,85  | 4,83E-01 |
| Q60817          | 13 | 2 | 5,93  | 17938               | Naca                      | 0 | 1,85  | 4,83E-01 |
| P62331          | 27 | 3 | 16,42 | 11845               | Arf6                      | 1 | 1,25  | 7,80E-01 |

|        |    |   |       |        |          |   |         |          |
|--------|----|---|-------|--------|----------|---|---------|----------|
| Q8BGD5 | 5  | 3 | 2,5   | 78070  | Cpt1c    | 0 | 1,10    | 9,76E-01 |
| Q9D6Y7 | 26 | 5 | 15,81 | 110265 | Msra     | 0 | 1,36    | 5,97E-01 |
| Q9D7X8 | 21 | 4 | 5,57  | 110175 | Ggct     | 0 | 0,98    | 9,91E-01 |
| Q8VHI6 | 7  | 3 | 19,89 | 245880 | Wasf3    | 0 | 1,24    | 7,86E-01 |
| Q8BG02 | 6  | 2 | 41,31 | 269643 | Ppp2r2c  | 0 | 0,87    | 7,62E-01 |
| A2AHG0 | 6  | 4 | 10,41 | 241638 | Lzts3    | 0 | 1,55    | 3,95E-01 |
| Q9CYR6 | 8  | 4 | 15,38 | 109785 | Pgm3     | 0 | 0,91    | 9,61E-01 |
| Q99J08 | 13 | 5 | 3,53  | 67815  | Sec14l2  | 0 | 1,14    | 9,21E-01 |
| Q921H9 | 14 | 3 | 22,24 | 69893  | Coa7     | 0 | 1,02    | 1,00E+00 |
| Q8BK72 | 10 | 4 | 11,47 | 218506 | Mrps27   | 0 | 0,53    | 1,37E-01 |
| P61967 | 16 | 2 | 18,95 | 11769  | Ap1s1    | 0 | 1,41    | 8,07E-01 |
| Q8R0W0 | 2  | 2 | 9,75  | 223650 | Eppk1    | 0 | 1000,00 | 1,60E-16 |
| P51655 | 9  | 3 | 1,92  | 14735  | Gpc4     | 1 | 1,13    | 9,69E-01 |
| Q922D4 | 5  | 3 | 6,29  | 52036  | Ppp6r3   | 0 | 1,08    | 9,78E-01 |
| A2BDX3 | 10 | 3 | 5,12  | 69372  | Mocs3    | 0 | 0,99    | 9,85E-01 |
| Q9CQJ6 | 26 | 4 | 13,33 | 68184  | Denr     | 0 | 1,01    | 1,00E+00 |
| Q9DC16 | 14 | 4 | 16,83 | 67458  | Ergic1   | 0 | 0,72    | 3,33E-01 |
| Q9DD18 | 15 | 2 | 13,46 | 66044  | Dtd1     | 0 | 2,06    | 1,28E-01 |
| O08688 | 10 | 5 | 0     | 12337  | Capn5    | 0 | 1,19    | 8,70E-01 |
| Q5XJV6 | 4  | 5 | 0     | 381983 | Lmtk3    | 0 | 0,77    | 8,34E-01 |
| Q640M6 | 6  | 3 | 7,27  | 233552 | Gdpd5    | 0 | 0,64    | 4,15E-01 |
| O88704 | 6  | 3 | 0     | 15165  | Hcn1     | 2 | 0,66    | 4,69E-01 |
| P97798 | 4  | 5 | 9,02  |        | Neol     | 0 | 1,07    | 9,91E-01 |
| Q9DCC4 | 11 | 2 | 25,74 | 66194  | Pycr3    | 0 | 0,77    | 6,32E-01 |
| Q9D1Q6 | 12 | 3 | 5,62  | 76299  | Erp44    | 0 | 0,82    | 8,54E-01 |
| Q3UGR5 | 15 | 4 | 29,15 | 76987  | Hdhd2    | 0 | 0,92    | 9,34E-01 |
| O54950 | 12 | 2 | 24,51 | 19082  | Prkag1   | 0 | 1,02    | 1,00E+00 |
| Q9D164 | 27 | 2 | 25,19 | 59095  | Fxyd6    | 0 | 1,98    | 2,91E-01 |
| A2ALU4 | 4  | 4 | 5,38  | 110380 | Shroom2  | 0 | 0,92    | 9,71E-01 |
| P70232 | 7  | 6 | 5,62  | 12661  | Chl1     | 0 | 1,13    | 9,67E-01 |
| Q59J78 | 27 | 4 | 2,3   | 75597  | Ndufaf2  | 0 | 0,73    | 6,09E-01 |
| P67871 | 13 | 3 | 29,02 | 13001  | Csnk2b   | 0 | 1,27    | 6,23E-01 |
| Q6DFV3 | 3  | 4 | 9,91  | 71435  | Arhgap21 | 0 | 1,19    | 9,39E-01 |
| Q9CQZ6 | 18 | 3 | 51,03 | 66495  | Ndufb3   | 0 | 1,97    | 2,99E-04 |
| Q62351 | 6  | 4 | 2,51  | 22042  | Tfrc     | 0 | 1,15    | 9,74E-01 |
| Q811I0 | 13 | 4 | 15,02 |        | Atpaf1   | 0 | 0,96    | 9,76E-01 |
| Q80XG9 | 6  | 3 | 26,88 | 243499 | Lrrtm4   | 0 | 0,88    | 9,34E-01 |
| Q8BGY9 | 7  | 4 | 23,61 | 63993  | Slc5a7   | 0 | 0,90    | 9,34E-01 |
| Q9JIG8 | 22 | 3 | 32,01 | 54637  | Praf2    | 0 | 1,24    | 6,93E-01 |
| Q8K3G9 | 7  | 3 | 5,67  | 216190 | Appl2    | 0 | 0,68    | 6,58E-01 |
| O35083 | 18 | 4 | 19,33 | 55979  | Agpat1   | 0 | 0,85    | 8,93E-01 |
| Q8K3P0 | 11 | 4 | 7,98  | 70061  | Sdr9c7   | 0 | 1,22    | 8,85E-01 |
| Q91XL9 | 4  | 2 | 27    | 64291  | Osbpl1a  | 1 | 1,04    | 9,85E-01 |
| Q9ESE1 | 1  | 4 | 9,26  | 80877  | Lrba     | 0 | 1,16    | 9,34E-01 |
| Q3KNM2 | 10 | 2 | 21,19 | 69104  | Marchf5  | 0 | 1,10    | 9,76E-01 |
| P97952 | 19 | 4 | 7,88  | 20266  | Scn1b    | 0 | 1,25    | 8,42E-01 |

|                |    |   |       |                         |                       |   |      |          |
|----------------|----|---|-------|-------------------------|-----------------------|---|------|----------|
| OVAL_CH<br>ICK | 9  | 2 | 24,71 | 396058                  | OVA;<br>SERPINB<br>14 | 0 | 0,31 | 2,63E-04 |
| Q6PDY2         | 10 | 2 | 29,52 | 211488                  | Ado                   | 0 | 0,55 | 3,26E-01 |
| Q9D6K5         | 23 | 3 | 33,36 | 105940<br>408;<br>24071 | Synj2bp               | 0 | 0,94 | 9,74E-01 |
| P97823         | 14 | 3 | 16,79 | 18777                   | Lypla1                | 0 | 1,62 | 4,21E-02 |
| O08842         | 7  | 3 | 16,42 | 14586                   | Gfra2                 | 0 | 0,94 | 9,74E-01 |
| Q8BMI3         | 9  | 5 | 0     | 260302                  | Gga3                  | 0 | 1,42 | 6,61E-01 |
| P62192         | 8  | 2 | 17,35 | 19179                   | Psmc1                 | 0 | 0,27 | 2,51E-03 |
| Q9Z2D0         | 8  | 5 | 9,11  | 210376                  | Mtmr9                 | 0 | 0,90 | 9,56E-01 |
| Q9WVG6         | 7  | 4 | 13,28 | 59035                   | Carm1                 | 0 | 1,07 | 9,79E-01 |
| Q922E4         | 11 | 4 | 7,43  | 68671                   | Pcyt2                 | 0 | 1,32 | 7,49E-01 |
| Q8BG18         | 6  | 2 | 10,78 | 69352                   | Necab1                | 0 | 0,73 | 7,77E-01 |
| Q91WG5         | 7  | 3 | 14,83 | 108099                  | Prkag2                | 1 | 0,96 | 9,76E-01 |
| Q9JIY5         | 8  | 3 | 5,47  | 64704                   | Htra2                 | 0 | 0,68 | 6,27E-01 |
| Q99KV1         | 14 | 3 | 6,22  | 67838                   | Dnajb11               | 0 | 1,27 | 8,70E-01 |
| Q8BGN3         | 8  | 4 | 9,94  | 320981                  | Enpp6                 | 0 | 0,97 | 9,78E-01 |
| Q9CPW4         | 21 | 2 | 29,31 | 67771                   | Arpc5                 | 0 | 0,81 | 7,52E-01 |
| Q8VHL1         | 11 | 3 | 19,88 | 73251                   | Setd7                 | 0 | 0,78 | 7,18E-01 |
| P97467         | 6  | 6 | 8,66  | 18484                   | Pam                   | 0 | 1,20 | 8,85E-01 |
| Q8K377         | 6  | 3 | 13,95 | 74342                   | Lrrtm1                | 0 | 0,98 | 9,85E-01 |
| Q9DBL1         | 10 | 5 | 13,08 | 66885                   | Acadsb                | 0 | 0,63 | 4,21E-02 |
| D3YZU1         | 3  | 3 | 10,61 | 243961                  | Shank1                | 0 | 0,95 | 9,77E-01 |
| Q8R1I1         | 38 | 2 | 22,72 | 66152                   | Uqcr10                | 0 | 1,12 | 9,47E-01 |
| Q8BGC4         | 10 | 3 | 10,41 | 225791                  | Zadh2                 | 0 | 0,76 | 7,28E-01 |
| P68040         | 14 | 4 | 8,16  | 14694                   | Rack1                 | 0 | 0,83 | 8,57E-01 |
| Q5DU41         | 4  | 3 | 6,15  | 433926                  | Lrrc8b                | 0 | 1,31 | 8,07E-01 |
| Q60870         | 10 | 2 | 31,79 |                         | Reep5                 | 0 | 1,26 | 6,42E-01 |
| P62869         | 47 | 4 | 17,55 | 67673                   | Elob                  | 0 | 1,33 | 5,89E-01 |
| Q8K0C9         | 11 | 3 | 15,08 | 218138                  | Gmds                  | 0 | 1,05 | 9,83E-01 |
| Q8BIK4         | 3  | 5 | 3,25  |                         | Dock9                 | 0 | 1,08 | 9,79E-01 |
| Q3UVK0         | 5  | 4 | 2,13  | 226090                  | Ermp1                 | 0 | 0,83 | 9,17E-01 |
| B1AS29         | 5  | 3 | 1,66  | 14807                   | Grik3                 | 0 | 1,46 | 6,63E-01 |
| Q8CI78         | 9  | 4 | 7,48  | 66084                   | Rmnd1                 | 0 | 0,91 | 9,56E-01 |
| Q8R4G0         | 6  | 4 | 18,92 | 80883                   | Ntng1                 | 0 | 1,00 | 9,96E-01 |
| Q8BGR6         | 15 | 3 | 21,56 | 218639                  | Arl15                 | 0 | 0,92 | 9,56E-01 |
| Q9ERL9         | 7  | 4 | 6,3   | 60596                   | Gucyl1a1              | 0 | 0,76 | 7,51E-01 |
| O70166         | 16 | 4 | 28,55 | 20262                   | Stmn3                 | 0 | 1,14 | 9,12E-01 |
| Q8BGY7         | 12 | 3 | 34,11 | 108654                  | Fam210a               | 0 | 0,85 | 7,86E-01 |
| Q3V038         | 17 | 3 | 16,27 | 69480                   | Ttc9                  | 0 | 0,91 | 9,59E-01 |
| Q8BWW3         | 9  | 4 | 6,42  | 225363                  | Etf1                  | 0 | 0,65 | 3,57E-01 |
| Q9D2Q8         | 21 | 2 | 19    | 66166                   | S100a14               | 0 | 1,44 | 2,26E-01 |
| Q5HZI2         | 13 | 4 | 3,85  | 237397                  | C2cd4c                | 0 | 1,13 | 9,56E-01 |
| Q8CGC7         | 3  | 4 | 1,99  | 107508                  | Eprs1                 | 0 | 0,81 | 8,97E-01 |
| P60521         | 28 | 4 | 21,39 | 93739                   | Gabarapl<br>2         | 0 | 0,99 | 9,85E-01 |

|        |    |   |       |                         |              |   |      |          |
|--------|----|---|-------|-------------------------|--------------|---|------|----------|
| Q7TNF0 | 7  | 2 | 14,16 | 13446                   | Doc2a        | 0 | 1,29 | 8,52E-01 |
| B1AY13 | 2  | 4 | 2,46  | 329908                  | Usp24        | 0 | 0,95 | 9,76E-01 |
| Q62059 | 1  | 3 | 8,06  |                         | Vcan         | 0 | 1,83 | 1,88E-01 |
| Q8CG76 | 10 | 3 | 22,52 | 110198                  | Akr7a2       | 0 | 1,20 | 9,22E-01 |
| Q8R3B1 | 7  | 4 | 4,55  | 18799                   | Plcd1        | 0 | 0,56 | 3,85E-01 |
| Q5SUC9 | 11 | 3 | 14,48 | 52892                   | Scol         | 0 | 0,93 | 9,56E-01 |
| O55135 | 17 | 2 | 2,92  | 16418                   | Eif6         | 0 | 0,00 | 1,60E-16 |
| Q80WQ2 | 5  | 5 | 10,2  | 234729                  | Vac14        | 0 | 1,03 | 9,85E-01 |
| Q91W90 | 10 | 4 | 1,69  | 105245                  | Txndc5       | 0 | 0,84 | 9,18E-01 |
| Q9QUG9 | 4  | 2 | 10,54 | 19395                   | Rasgrp2      | 0 | 0,97 | 9,78E-01 |
| Q61418 | 4  | 2 | 16,61 | 12727                   | Cln4         | 0 | 0,80 | 8,85E-01 |
| Q9JKF7 | 15 | 5 | 3,32  | 27393                   | Mrpl39       | 0 | 0,65 | 4,67E-01 |
| Q60759 | 8  | 3 | 19,81 | 270076                  | Gcdh         | 0 | 1,07 | 9,76E-01 |
| P51830 | 4  | 5 | 1,87  | 11515                   | Adcy9        | 0 | 0,85 | 8,43E-01 |
| Q8R146 | 8  | 4 | 3,28  | 235606                  | Apeh         | 0 | 0,87 | 9,23E-01 |
| O55003 | 18 | 3 | 4,47  | 12176                   | Bnip3        | 0 | 0,65 | 4,82E-01 |
| Q91W86 | 6  | 5 | 10,63 | 71732                   | Vps11        | 0 | 0,94 | 9,74E-01 |
| Q9D6U8 | 16 | 2 | 10,7  | 70186                   | Fam162a      | 0 | 0,84 | 8,53E-01 |
| Q8BPM0 | 3  | 4 | 6,1   | 208846                  | Daam1        | 0 | 1,01 | 9,99E-01 |
| Q9Z2Y8 | 15 | 5 | 10,88 | 114863                  | Plpbp        | 0 | 1,08 | 9,76E-01 |
| P03930 | 34 | 2 | 40,23 | 17706                   | Mtstp8       | 0 | 1,05 | 9,87E-01 |
| Q6RHR9 | 3  | 3 | 9,7   | 14924                   | Magi1        | 0 | 1,10 | 9,76E-01 |
| Q8K009 | 3  | 3 | 17,08 | 216188                  | Aldh1l2      | 0 | 0,89 | 8,70E-01 |
| P32020 | 7  | 4 | 5,49  | 20280                   | Scp2         | 0 | 0,96 | 9,76E-01 |
| P61022 | 16 | 3 | 24,33 | 56398                   | Chp1         | 0 | 1,12 | 9,61E-01 |
| Q9QZC2 | 2  | 3 | 33,64 | 54712                   | Plxnc1       | 0 | 0,83 | 8,78E-01 |
| Q9EPU0 | 5  | 5 | 1,8   | 19704                   | Upfl         | 0 | 0,81 | 8,57E-01 |
| P22933 | 12 | 4 | 3,74  | 14403                   | Gabrd        | 0 | 1,23 | 8,91E-01 |
| P97461 | 18 | 3 | 16,8  | 20103                   | Rps5         | 0 | 0,94 | 9,74E-01 |
| Q8BG40 | 9  | 4 | 2,19  | 74187                   | Katnb1       | 0 | 1,67 | 4,27E-01 |
| Q9JM13 | 7  | 3 | 5,6   | 56715                   | Rabgef1      | 0 | 1,18 | 9,48E-01 |
| P52825 | 5  | 3 | 6,67  | 12896                   | Cpt2         | 0 | 0,70 | 1,11E-01 |
| E9Q4Z2 | 2  | 4 | 1,85  | 100705                  | Acacb        | 0 | 2,32 | 3,09E-02 |
| Q3UTH8 | 6  | 3 | 14,15 | 236915                  | Arhgef9      | 0 | 1,00 | 9,91E-01 |
| Q8VEJ9 | 12 | 5 | 1,74  | 116733                  | Vps4a        | 0 | 1,01 | 1,00E+00 |
| O35607 | 3  | 2 | 11,34 | 12168                   | Bmpr2        | 0 | 0,91 | 9,50E-01 |
| Q9CYW4 | 16 | 4 | 19,97 | 72748                   | Hdhd3        | 0 | 0,59 | 2,71E-02 |
| Q8BR63 | 15 | 3 | 15    | 100101<br>807;<br>73385 | Fam177a<br>1 | 0 | 0,97 | 9,76E-01 |
| P46978 | 5  | 4 | 1,98  | 16430                   | Stt3a        | 0 | 1,11 | 9,33E-01 |
| Q9CXW4 | 13 | 2 | 10,18 | 67025                   | Rpl11        | 0 | 0,84 | 8,70E-01 |
| O88602 | 11 | 2 | 21,88 | 12300                   | Cacng2       | 1 | 0,63 | 1,36E-01 |
| P10518 | 12 | 3 | 18,35 | 17025                   | Alad         | 0 | 0,78 | 7,73E-01 |
| P16283 | 6  | 6 | 0     | 20536                   | Slc4a3       | 0 | 0,70 | 6,86E-01 |
| Q99MB7 | 14 | 3 | 10,94 | 67150                   | Rnf141       | 0 | 1,40 | 6,97E-01 |
| P38060 | 11 | 3 | 12,77 | 15356                   | Hmgcl        | 0 | 0,55 | 1,81E-01 |

|        |    |   |       |               |              |   |       |          |
|--------|----|---|-------|---------------|--------------|---|-------|----------|
| Q61923 | 6  | 2 | 27,94 | 16494         | Kcna6        | 0 | 1,19  | 9,39E-01 |
| Q62132 | 7  | 3 | 7,09  | 19279         | Ptpr         | 0 | 1,15  | 9,54E-01 |
| Q9WV98 | 39 | 3 | 3,67  | 30056         | Timm9        | 0 | 1,05  | 9,84E-01 |
| Q9D6K8 | 16 | 3 | 5,76  | 67391         | Fundc2       | 0 | 1,29  | 8,91E-01 |
| Q80XA6 | 10 | 3 | 6,25  | 194590        | Reps2        | 1 | 1,23  | 8,91E-01 |
| Q8CGQ8 | 5  | 3 | 5,42  | 238384        | Slc24a4      | 0 | 0,89  | 8,85E-01 |
| Q923D2 | 17 | 3 | 4,21  | 233016        | Blvrb        | 0 | 0,93  | 9,72E-01 |
| Q61626 | 4  | 3 | 4,13  | 14809         | Grik5        | 0 | 0,79  | 8,81E-01 |
| Q8R4F1 | 5  | 3 | 5,04  | 171171        | Ntng2        | 0 | 0,82  | 8,56E-01 |
| Q69ZF3 | 4  | 3 | 10,57 | 230101        | Gba2         | 0 | 0,86  | 9,16E-01 |
| Q99LF4 | 7  | 3 | 9,4   | 28088         | Rtcb         | 0 | 0,76  | 7,41E-01 |
| Q9WVL0 | 11 | 2 | 14,28 | 14874         | Gstz1        | 0 | 1,20  | 9,13E-01 |
| Q9CQ19 | 17 | 3 | 8,9   | 98932         | Myl9         | 0 | 1,08  | 9,74E-01 |
| Q8VHQ9 | 11 | 5 | 5,04  | 329910        | Acot11       | 0 | 1,24  | 7,89E-01 |
| Q8VCL2 | 10 | 2 | 14,56 | 100126<br>824 | Sco2         | 0 | 0,78  | 8,35E-01 |
| Q9CZB0 | 22 | 3 | 8,37  | 66052         | Sdhc         | 0 | 0,63  | 2,65E-01 |
| Q8C9H6 | 6  | 3 | 16,22 | 320609        | Strip2       | 1 | 1,28  | 6,98E-01 |
| Q9JHG6 | 10 | 2 | 14,71 | 54720         | Rcan1        | 0 | 0,59  | 2,86E-01 |
| Q9DBS1 | 9  | 3 | 16,46 | 74122         | Tmem43       | 0 | 1,02  | 9,99E-01 |
| Q8BFQ8 | 14 | 3 | 16,16 | 213350        | Gatd1        | 0 | 1,12  | 9,69E-01 |
| Q6PEB6 | 16 | 3 | 8,59  | 19070         | Mob4         | 0 | 0,84  | 8,41E-01 |
| P35290 | 17 | 3 | 20,9  | 19336         | Rab24        | 0 | 1,56  | 3,64E-01 |
| P56546 | 7  | 4 | 44,82 | 13017         | Ctbp2        | 0 | 1,25  | 6,07E-01 |
| Q8VE88 | 5  | 2 | 13,33 | 67726         | Fam114a<br>2 | 0 | 0,71  | 6,10E-01 |
| P21995 | 9  | 2 | 12,97 | 13723         | Emb          | 0 | 1,08  | 9,76E-01 |
| Q9WTL7 | 18 | 4 | 27,6  | 26394         | Lypla2       | 0 | 1,18  | 8,17E-01 |
| Q3URE9 | 4  | 2 | 18,34 | 242384        | Lingo2       | 0 | 1,98  | 2,26E-03 |
| Q6P2B1 | 6  | 5 | 5,02  | 320938        | Tnpo3        | 0 | 0,81  | 7,67E-01 |
| Q91V36 | 8  | 4 | 4,95  |               | Nrbp2        | 0 | 0,96  | 9,76E-01 |
| Q8VBY2 | 6  | 2 | 3,02  | 55984         | Camkk1       | 0 | 0,00  | 1,60E-16 |
| Q61425 | 9  | 3 | 13,02 | 15107         | Hadh         | 0 | 0,60  | 2,86E-01 |
| Q8K4Z3 | 13 | 3 | 12,1  | 246703        | Naxe         | 0 | 0,96  | 9,74E-01 |
| Q921E2 | 16 | 3 | 10,46 | 106572        | Rab31        | 0 | 0,73  | 6,59E-01 |
| Q6PDC8 | 5  | 2 | 6,84  | 213006        | Mfsd4a       | 0 | 22,23 | 1,60E-16 |
| Q7TT45 | 8  | 3 | 5,57  | 52187         | Rragd        | 0 | 1,14  | 8,85E-01 |
| Q8BZA9 | 9  | 2 | 8,5   | 319801        | Tigar        | 0 | 2,22  | 5,23E-02 |
| Q3UH93 | 2  | 3 | 28,79 | 67784         | Plxnd1       | 0 | 2,27  | 1,22E-01 |
| Q91W50 | 5  | 5 | 1,69  | 229663        | Csde1        | 0 | 0,87  | 8,17E-01 |
| P47791 | 5  | 2 | 34,09 | 14782         | Gsr          | 0 | 0,89  | 9,16E-01 |
| Q8BXT1 | 18 | 3 | 8,29  | 67792         | Rgs8         | 0 | 0,69  | 6,06E-01 |
| O08586 | 8  | 4 | 10,78 | 19211         | Pten         | 0 | 1,35  | 6,42E-01 |
| O88703 | 6  | 2 | 1,61  | 15166         | Hcn2         | 0 | 0,00  | 1,60E-16 |
| Q8VE62 | 7  | 4 | 10,95 | 218693        | Paip1        | 0 | 1,21  | 8,82E-01 |
| P97492 | 6  | 3 | 22,4  | 51791         | Rgs14        | 0 | 0,93  | 9,74E-01 |
| Q9JL62 | 12 | 2 | 12,2  | 56356         | Gltf         | 0 | 0,74  | 7,90E-01 |
| Q5Y4Y6 | 5  | 3 | 17,95 | 450219        | Gsdma3       | 0 | 0,94  | 9,59E-01 |

|        |    |   |       |        |             |   |      |          |
|--------|----|---|-------|--------|-------------|---|------|----------|
| Q9WVP1 | 7  | 3 | 32,03 | 11768  | Ap1m2       | 0 | 0,76 | 5,29E-01 |
| Q3ULF4 | 4  | 3 | 6,68  | 234847 | Spg7        | 0 | 0,71 | 6,42E-01 |
| A2AP18 | 3  | 5 | 3,7   | 269615 | Plch2       | 0 | 0,61 | 1,82E-01 |
| Q06335 | 7  | 3 | 8,88  | 11804  | Aplp2       | 0 | 1,42 | 1,91E-01 |
| Q8BHJ7 | 6  | 2 | 26,29 | 110886 | Gabra5      | 0 | 1,17 | 8,37E-01 |
| O35215 | 22 | 2 | 5,44  | 13202  | Ddt         | 0 | 1,27 | 9,02E-01 |
| Q923L3 | 1  | 3 | 1,63  | 94109  | Csmd1       | 1 | 1,47 | 6,61E-01 |
| Q8R4I7 | 10 | 3 | 7,13  | 246317 | Neto1       | 0 | 0,98 | 9,85E-01 |
| Q9JK42 | 10 | 3 | 9,95  | 18604  | Pdk2        | 0 | 1,07 | 9,76E-01 |
| P69566 | 4  | 2 | 6,22  | 56705  | Ranbp9      | 0 | 1,16 | 9,48E-01 |
| Q9DB27 | 12 | 2 | 9,32  | 68995  | Mcts1       | 0 | 1,70 | 2,12E-01 |
| Q9Z2D1 | 7  | 4 | 5,16  | 77116  | Mtmr2       | 0 | 1,25 | 9,02E-01 |
| P35505 | 8  | 3 | 14,34 | 14085  | Fah         | 0 | 0,80 | 7,99E-01 |
| Q80Y14 | 17 | 2 | 2,89  | 73046  | Glr5        | 0 | 0,86 | 9,45E-01 |
| Q61334 | 10 | 2 | 12,31 | 12033  | Bcap29      | 0 | 1,14 | 9,71E-01 |
| Q6ZQ82 | 3  | 2 | 16,77 | 71302  | Arhgap26    | 0 | 1,25 | 8,85E-01 |
| Q9D428 | 14 | 3 | 8,16  | 71146  | GOLGA7<br>B | 0 | 1,54 | 4,13E-01 |
| Q8C1Y8 | 6  | 2 | 20,3  | 231874 | Ccz1        | 0 | 0,96 | 9,76E-01 |
| Q8K0D0 | 7  | 2 | 33,32 | 237459 | Cdk17       | 1 | 1,34 | 8,07E-01 |
| Q04735 | 8  | 2 | 33,32 | 18555  | Cdk16       | 0 | 1,34 | 8,07E-01 |
| Q0VBD0 | 5  | 4 | 5,74  | 320910 | Itgb8       | 0 | 1,49 | 5,91E-01 |
| Q8JZR6 | 3  | 2 | 9,44  | 59033  | Slc4a8      | 0 | 0,47 | 1,55E-01 |
| Q6NXX8 | 6  | 3 | 14,85 | 11419  | Asic1       | 0 | 1,07 | 9,76E-01 |
| Q7TNG5 | 7  | 3 | 8,12  | 72205  | Eml2        | 0 | 1,74 | 4,33E-01 |
| O54916 | 5  | 2 | 6,09  | 19707  | Reps1       | 0 | 1,25 | 9,25E-01 |
| Q6NS82 | 11 | 3 | 4,62  | 227298 | Retreg2     | 0 | 1,14 | 9,71E-01 |
| Q9WV07 | 5  | 3 | 8,09  | 23801  | Aloxe3      | 0 | 1,48 | 6,46E-01 |
| Q8R5J9 | 14 | 3 | 22,01 | 65106  | Arl6ip5     | 0 | 1,19 | 7,77E-01 |
| Q99KF1 | 17 | 3 | 20,88 | 67511  | Tmed9       | 0 | 2,28 | 1,21E-06 |
| P97447 | 11 | 3 | 18,5  | 14199  | Fhl1        | 0 | 1,74 | 2,16E-02 |
| Q9EPR4 | 6  | 3 | 2,06  | 54338  | Slc23a2     | 0 | 0,74 | 7,12E-01 |
| P61963 | 13 | 4 | 5,46  | 71833  | Dcaf7       | 0 | 0,86 | 9,11E-01 |
| Q9JLT4 | 4  | 2 | 14,18 | 26462  | Txnrd2      | 0 | 0,78 | 6,66E-01 |
| Q8JZR0 | 3  | 2 | 40,58 | 433256 | Acs15       | 0 | 0,79 | 6,58E-01 |
| Q8VI75 | 4  | 3 | 2,25  | 75751  | Ipo4        | 0 | 1,10 | 9,76E-01 |
| Q80VC9 | 6  | 4 | 0     | 69697  | Camsap3     | 0 | 1,54 | 6,94E-01 |
| O35114 | 8  | 4 | 9,41  | 12492  | Scarb2      | 0 | 0,75 | 2,68E-01 |
| Q8BTG3 | 7  | 3 | 10,37 | 320554 | Tcp1111     | 0 | 1,55 | 5,85E-01 |
| Q9JI39 | 4  | 3 | 2,07  | 56199  | Abcb10      | 0 | 0,91 | 9,59E-01 |
| Q8JZW5 | 10 | 4 | 0     | 230863 | Sh2d5       | 0 | 0,71 | 6,52E-01 |
| O88958 | 11 | 3 | 9,26  | 26384  | Gnpda1      | 0 | 1,09 | 9,74E-01 |
| Q8BUY5 | 13 | 3 | 4,39  | 76916  | Timmec1     | 0 | 0,63 | 5,80E-01 |
| Q9Z0L0 | 7  | 3 | 8,55  | 21983  | Tpbg        | 0 | 0,85 | 8,93E-01 |
| P53702 | 10 | 2 | 10,16 | 15159  | Hccs        | 0 | 0,00 | 1,60E-16 |
| Q9CRB8 | 21 | 3 | 25,71 | 67900  | Mtff1       | 0 | 0,98 | 9,78E-01 |
| Q80ZW2 | 17 | 4 | 7,58  | 223626 | Them6       | 0 | 1,39 | 7,52E-01 |

|        |    |   |       |        |          |   |        |          |
|--------|----|---|-------|--------|----------|---|--------|----------|
| Q14C51 | 5  | 3 | 5,4   | 69956  | Ptcd3    | 0 | 0,81   | 8,41E-01 |
| Q9QZB9 | 12 | 2 | 9,18  | 59288  | Dctn5    | 0 | 0,94   | 9,76E-01 |
| Q3TRJ4 | 5  | 3 | 41,58 | 320864 | Krt26    | 0 | 1,61   | 4,64E-02 |
| Q9ET30 | 5  | 3 | 13,19 | 107358 | Tm9sf3   | 0 | 1,05   | 9,76E-01 |
| P24547 | 6  | 2 | 9,86  | 23918  | Impdh2   | 1 | 1,14   | 9,13E-01 |
| Q9CY18 | 5  | 2 | 5,66  |        | Snx7     | 0 | 0,72   | 6,74E-01 |
| Q3UMB5 | 4  | 4 | 1,76  | 237782 | Smcr8    | 0 | 1,08   | 9,85E-01 |
| Q9D8Y1 | 15 | 3 | 29,04 | 66271  | Tmem126a | 0 | 0,70   | 1,22E-01 |
| Q9CQI6 | 23 | 4 | 39,08 | 72042  | Cotl1    | 0 | 0,92   | 9,12E-01 |
| P00158 | 7  | 3 | 32,84 | 17711  | Mt-Cyb   | 0 | 0,77   | 4,00E-01 |
| Q61249 | 7  | 2 | 8,35  | 18518  | Igbp1    | 0 | 1,22   | 9,09E-01 |
| O55229 | 9  | 2 | 5,44  | 12651  | Chkb     | 0 | 1,34   | 8,44E-01 |
| Q8BGT1 | 5  | 3 | 4,3   | 71436  | Flrt3    | 0 | 1,00   | 9,85E-01 |
| Q99M51 | 11 | 3 | 0     | 17973  | Nck1     | 0 | 0,90   | 9,66E-01 |
| Q6NVF0 | 3  | 3 | 2,16  | 320634 | Ocr1     | 0 | 1,56   | 7,23E-01 |
| Q8K4I3 | 3  | 2 | 22,69 | 73341  | Arhgef6  | 0 | 0,84   | 8,36E-01 |
| P17047 | 6  | 3 | 9,14  | 16784  | Lamp2    | 0 | 0,79   | 7,97E-01 |
| Q91VT4 | 11 | 2 | 5,68  | 234309 | Cbr4     | 0 | 0,80   | 8,12E-01 |
| Q9D415 | 3  | 2 | 5,85  | 224997 | Dlgap1   | 0 | 1,40   | 7,86E-01 |
| Q921W4 | 10 | 3 | 4,02  | 66609  | Cryz11   | 0 | 1,08   | 9,78E-01 |
| Q3URE1 | 4  | 2 | 10,82 | 257633 | Acsf3    | 0 | 1,39   | 7,63E-01 |
| Q8BWR2 | 12 | 2 | 7,64  | 66193  | Pithd1   | 0 | 1,14   | 9,02E-01 |
| Q9DCZ1 | 12 | 4 | 3,73  | 66355  | Gmpr     | 0 | 0,86   | 7,52E-01 |
| Q8BL66 | 2  | 3 | 1,87  | 216238 | Eea1     | 0 | 1,40   | 7,49E-01 |
| Q3TVA9 | 2  | 2 | 4,42  | 232664 | Ccdc136  | 0 | 0,63   | 6,23E-01 |
| Q9CYN9 | 6  | 2 | 15,17 | 70495  | Atp6ap2  | 0 | 1,24   | 7,50E-01 |
| P61620 | 6  | 2 | 22,64 | 53421  | Sec61a1  | 1 | 1,24   | 6,93E-01 |
| Q9D832 | 11 | 3 | 4,87  | 67035  | Dnajb4   | 0 | 1,23   | 9,09E-01 |
| P54830 | 7  | 4 | 13,87 | 19259  | Ptpn5    | 0 | 0,82   | 6,07E-01 |
| Q64291 | 6  | 2 | 4,75  |        | Krt12    | 0 | 160,05 | 1,60E-16 |
| Q9D1P4 | 16 | 4 | 0     | 66917  | Chordc1  | 0 | 1,12   | 9,76E-01 |
| Q8QZV4 | 6  | 2 | 6,61  | 57740  | Stk32c   | 0 | 0,91   | 9,71E-01 |
| Q3TUH1 | 11 | 3 | 16,2  |        | Tamm41   | 0 | 0,94   | 9,76E-01 |
| Q8BGX3 | 7  | 3 | 1,99  | 211187 | Lrtm2    | 0 | 0,91   | 9,70E-01 |
| P97792 | 10 | 4 | 11,05 | 13052  | Cxadr    | 0 | 1,05   | 9,85E-01 |
| Q91VR7 | 17 | 2 | 7,59  | 66734  | Map11c3a | 0 | 0,75   | 2,74E-01 |
| Q6ZPR4 | 5  | 4 | 1,96  | 227632 | Kcnt1    | 0 | 0,72   | 8,12E-01 |
| Q9EPB7 | 11 | 2 | 22,56 | 64378  | Gpr88    | 0 | 1,01   | 1,00E+00 |
| P70236 | 11 | 3 | 6,04  | 26399  | Map2k6   | 0 | 1,28   | 9,02E-01 |
| Q8JZU2 | 8  | 2 | 15,23 | 13358  | Slc25a1  | 0 | 1,00   | 9,96E-01 |
| Q6P4S6 | 2  | 3 | 15,11 | 70661  | Sik3     | 0 | 1,13   | 9,34E-01 |
| Q8BHH2 | 11 | 2 | 17    | 319642 | Rab9b    | 0 | 1,34   | 4,34E-01 |
| P83940 | 20 | 2 | 9,1   | 67923  | Eloc     | 0 | 0,95   | 9,76E-01 |
| O55091 | 15 | 3 | 0     | 16210  | Impact   | 0 | 1,55   | 5,36E-01 |
| Q9CQX5 | 11 | 2 | 15,44 | 224250 | Cldnd1   | 0 | 0,73   | 6,59E-01 |
| Q9JI19 | 6  | 2 | 12,62 | 58249  | Fibp     | 0 | 1,05   | 9,94E-01 |

|        |    |   |       |        |               |   |      |          |
|--------|----|---|-------|--------|---------------|---|------|----------|
| Q99KN9 | 5  | 3 | 4,71  |        | Clint1        | 0 | 1,36 | 7,89E-01 |
| P59281 | 4  | 4 | 5,49  | 223666 | Arhgap39      | 0 | 1,03 | 1,00E+00 |
| Q3TCJ1 | 5  | 2 | 8,18  | 109359 | Abraxas2      | 0 | 1,08 | 9,76E-01 |
| A2ADY9 | 8  | 3 | 7,33  | 68817  | Ddi2          | 0 | 1,11 | 9,76E-01 |
| Q91Z38 | 8  | 2 | 10,58 | 66827  | Ttc1          | 0 | 2,02 | 2,62E-01 |
| Q78IK4 | 16 | 3 | 8,07  | 68117  | Apool         | 0 | 0,90 | 9,71E-01 |
| Q9DCT1 | 9  | 2 | 21,94 | 56043  | Akr1e2        | 0 | 0,95 | 9,76E-01 |
| P62627 | 23 | 2 | 2,02  | 67068  | Dynlrb1       | 0 | 0,52 | 2,38E-01 |
| P61759 | 14 | 3 | 9,49  | 22327  | Vbp1          | 0 | 1,12 | 9,70E-01 |
| Q01149 | 2  | 3 | 13,56 | 12843  | Colla2        | 0 | 0,76 | 7,41E-01 |
| Q8BGA3 | 5  | 3 | 11,2  | 107065 | Lrrtm2        | 0 | 0,75 | 7,38E-01 |
| Q99JG2 | 6  | 3 | 17,52 | 171469 | Gpr3711       | 0 | 1,10 | 9,41E-01 |
| Q6ZWX6 | 6  | 2 | 23,56 | 13665  | Eif2s1        | 0 | 1,01 | 1,00E+00 |
| Q5XKN4 | 13 | 2 | 1,91  | 67767  | Jagn1         | 0 | 1,46 | 7,37E-01 |
| Q99J77 | 9  | 2 | 6,84  | 94181  | Nans          | 0 | 0,90 | 9,56E-01 |
| P19639 | 11 | 3 | 28,37 | 14864  | Gstm3         | 0 | 1,02 | 9,99E-01 |
| Q9QZS3 | 7  | 2 | 8,17  | 18222  | Numb          | 0 | 1,45 | 6,37E-01 |
| Q9WUC3 | 15 | 2 | 6,41  | 23934  | Ly6h          | 0 | 0,06 | 1,60E-16 |
| P97324 | 9  | 4 | 0     | 14380  | G6pd2         | 0 | 0,93 | 9,70E-01 |
| Q91YM4 | 6  | 3 | 2,5   | 21379  | Tbrg4         | 0 | 0,74 | 7,74E-01 |
| P23492 | 15 | 3 | 9,52  | 18950  | Pnp           | 0 | 0,94 | 9,74E-01 |
| Q9JIZ9 | 10 | 4 | 1,69  | 70310  | Plscr3        | 0 | 0,85 | 7,17E-01 |
| Q8R123 | 7  | 3 | 14,28 | 319945 | Flad1         | 0 | 1,19 | 9,22E-01 |
| Q9ER72 | 4  | 3 | 1,85  | 27267  | Cars1         | 0 | 1,04 | 1,00E+00 |
| Q9D154 | 6  | 2 | 6,33  | 66222  | Serpinb1a     | 0 | 0,83 | 6,97E-01 |
| Q8CG72 | 6  | 2 | 10,43 | 100206 | Adprs         | 0 | 1,04 | 1,00E+00 |
| Q2TPA8 | 6  | 3 | 9,06  | 72479  | Hsdl2         | 0 | 0,63 | 3,86E-01 |
| Q3UUI3 | 16 | 3 | 4,28  | 75778  | Them4         | 0 | 0,55 | 1,93E-01 |
| Q91VK4 | 16 | 3 | 3,81  | 64294  | Itm2c         | 0 | 0,97 | 9,76E-01 |
| Q91V57 | 6  | 2 | 3,59  | 108699 | Chn1          | 0 | 1,22 | 9,60E-01 |
| Q8BYH7 | 4  | 2 | 9,65  | 233204 | Tbc1d17       | 0 | 1,02 | 1,00E+00 |
| Q8BFY6 | 8  | 3 | 10,54 | 67898  | Pef1          | 0 | 0,58 | 2,91E-01 |
| P58021 | 3  | 2 | 13,52 | 68059  | Tm9sf2        | 0 | 0,92 | 9,74E-01 |
| Q9CQE1 | 12 | 3 | 12,09 | 66536  | Nipsnap3<br>b | 0 | 1,10 | 9,56E-01 |
| Q8BIG7 | 8  | 2 | 24,65 | 69156  | Comtd1        | 0 | 0,92 | 9,25E-01 |
| O54781 | 5  | 3 | 12,85 | 20817  | Srpk2         | 0 | 1,12 | 9,76E-01 |
| Q9JKX6 | 14 | 3 | 10,06 | 53893  | Nudt5         | 0 | 1,68 | 5,07E-01 |
| Q5NCE8 | 5  | 2 | 14    | 380836 | Mrs2          | 0 | 0,77 | 7,77E-01 |
| Q8BJ03 | 5  | 2 | 12,92 | 226139 | Cox15         | 0 | 0,71 | 7,33E-01 |
| Q91VM3 | 7  | 2 | 6,02  | 54636  | Wdr45         | 0 | 1,59 | 5,21E-01 |
| P47758 | 13 | 2 | 4,45  | 20818  | Srprb         | 0 | 0,00 | 1,60E-16 |
| Q91V76 | 8  | 2 | 5,86  |        |               | 0 | 0,94 | 9,76E-01 |
| O35495 | 7  | 2 | 31,59 | 18647  | Cdk14         | 0 | 1,47 | 7,13E-01 |
| Q9R1C6 | 4  | 2 | 6,93  | 56077  | Dgke          | 0 | 0,89 | 9,59E-01 |
| P51791 | 4  | 3 | 10,45 | 12725  | Cln3          | 1 | 0,72 | 2,37E-01 |
| Q7TMS5 | 3  | 2 | 12,11 | 26357  | Abcg2         | 0 | 0,67 | 5,32E-01 |



|                |    |   |       |        |         |   |      |          |
|----------------|----|---|-------|--------|---------|---|------|----------|
| D3YZP9         | 9  | 4 | 0     | 76551  | Ccdc6   | 0 | 1,33 | 8,07E-01 |
| Q9WTP6         | 15 | 3 | 10,01 | 11637  | Ak2     | 0 | 1,15 | 9,56E-01 |
| Q2TBE6         | 8  | 4 | 3,36  | 84095  | Pi4k2a  | 0 | 1,03 | 1,00E+00 |
| Q6PE15         | 9  | 3 | 3,74  | 213012 | Abhd10  | 0 | 1,63 | 4,51E-01 |
| Q3UHG7         | 9  | 3 | 0     |        | Dennd11 | 0 | 0,76 | 8,09E-01 |
| Q03173         | 5  | 4 | 9,25  | 13800  | Enah    | 0 | 0,97 | 9,78E-01 |
| O08576         | 4  | 2 | 12,77 | 51799  | Rundc3a | 0 | 0,81 | 8,85E-01 |
| Q7TSV4         | 6  | 4 | 0     | 66681  | Pgm2    | 0 | 1,25 | 9,23E-01 |
| Q9JM63         | 7  | 2 | 9,53  | 16513  | Kcnj10  | 0 | 0,98 | 9,88E-01 |
| Q5U4E0         | 12 | 3 | 1,85  | 269788 | Lhfp14  | 0 | 1,20 | 9,16E-01 |
| O55137         | 5  | 2 | 11,11 | 26897  | Acot1   | 0 | 0,97 | 9,76E-01 |
| Q9QYR9         | 5  | 2 | 11,11 | 171210 | Acot2   | 0 | 0,97 | 9,76E-01 |
| Q8BX10         | 11 | 3 | 12,25 | 72542  | Pgam5   | 0 | 0,84 | 8,85E-01 |
| Q8VE09         | 6  | 3 | 5,73  | 72747  | Ttc39c  | 0 | 1,11 | 9,78E-01 |
| Q9D3P8         | 14 | 2 | 9,47  | 67759  | Plgrkt  | 0 | 0,75 | 7,93E-01 |
| Q8BFZ2         | 5  | 2 | 11,76 | 272031 | Plppr1  | 0 | 1,13 | 9,11E-01 |
| SODC_HU<br>MAN | 20 | 2 | 11,28 |        |         | 0 | 0,73 | 7,69E-01 |
| P49945         | 25 | 3 | 0     |        | Ftl2    | 0 | 0,74 | 7,77E-01 |
| Q9JJ59         | 4  | 2 | 7,86  | 56325  | Abcb9   | 0 | 0,53 | 3,85E-01 |
| P70349         | 17 | 2 | 12,8  | 15254  | Hint1   | 0 | 0,97 | 9,76E-01 |
| P56873         | 19 | 2 | 2,77  | 56390  | Znrd2   | 0 | 1,69 | 4,83E-01 |
| Q9EP53         | 3  | 3 | 6,15  | 64930  | Tsc1    | 0 | 1,17 | 9,41E-01 |
| P17439         | 4  | 2 | 3,59  | 14466  | Gba     | 0 | 1,28 | 8,70E-01 |
| Q9DBX6         | 7  | 3 | 2,44  | 74134  | Cyp2s1  | 0 | 1,16 | 9,62E-01 |
| Q9JI90         | 5  | 2 | 11,74 | 56736  | Rnf14   | 0 | 1,04 | 1,00E+00 |
| P56395         | 19 | 2 | 4,5   | 109672 | Cyb5a   | 0 | 1,11 | 9,76E-01 |
| A2APY7         | 7  | 2 | 4,15  | 69487  | Ndufaf5 | 0 | 0,78 | 7,97E-01 |
| Q9D020         | 10 | 3 | 5,92  | 107569 | Nt5c3a  | 0 | 0,95 | 9,78E-01 |
| P0C7L0         | 7  | 3 | 4,12  |        | Wipf3   | 0 | 1,28 | 8,10E-01 |
| D3Z7H4         | 7  | 2 | 18,08 | 269994 | Gsg11   | 0 | 1,07 | 9,85E-01 |
| P62301         | 9  | 2 | 4,15  | 68052  | Rps13   | 0 | 0,00 | 1,60E-16 |
| O09131         | 13 | 3 | 1,83  | 14873  | Gsto1   | 0 | 0,93 | 9,56E-01 |
| Q9ES56         | 15 | 3 | 2,2   | 60409  | Trappc4 | 0 | 1,29 | 7,86E-01 |
| P68037         | 17 | 3 | 5,17  | 22195  | Ube2l3  | 0 | 1,44 | 6,79E-01 |
| Q80T79         | 1  | 2 | 1,63  | 239420 | Csmd3   | 0 | 1,10 | 9,77E-01 |
| Q3U0D9         | 3  | 3 | 1,93  | 209462 | Hace1   | 0 | 1,49 | 6,59E-01 |
| Q9DBR3         | 4  | 3 | 11,18 | 74125  | Armc8   | 0 | 1,35 | 5,25E-01 |
| Q8BYC6         | 3  | 3 | 19,04 | 330177 | Taok3   | 0 | 1,06 | 9,74E-01 |
| P63216         | 29 | 2 | 11,07 | 14704  | Gng3    | 0 | 1,00 | 1,00E+00 |
| Q80YV4         | 4  | 3 | 1,68  | 269614 | Pank4   | 0 | 1,07 | 9,85E-01 |
| P16110         | 9  | 2 | 2,28  |        | Lgals3  | 0 | 1,12 | 9,76E-01 |
| Q9D9V3         | 9  | 3 | 6,95  | 52665  | Echdc1  | 0 | 0,68 | 2,19E-01 |
| Q8BMK4         | 7  | 4 | 0     | 216197 | Ckap4   | 0 | 0,29 | 4,18E-03 |
| Q9WTK7         | 7  | 3 | 6,31  | 20869  | Stk11   | 0 | 1,40 | 7,33E-01 |
| P47743         | 6  | 3 | 8,07  | 14823  | Grm8    | 0 | 1,20 | 9,56E-01 |
| Q99KC8         | 4  | 3 | 9,47  | 67776  | Vwa5a   | 0 | 0,76 | 4,28E-01 |

|        |    |   |       |                                                               |                                        |   |      |          |
|--------|----|---|-------|---------------------------------------------------------------|----------------------------------------|---|------|----------|
| Q8CIB5 | 5  | 3 | 0     | 218952                                                        | Fermt2                                 | 0 | 0,69 | 6,86E-01 |
| O54946 | 7  | 2 | 9,32  | 23950                                                         | Dnajb6                                 | 0 | 1,28 | 9,11E-01 |
| P70699 | 4  | 3 | 3,38  | 14387                                                         | Gaa                                    | 0 | 0,70 | 6,90E-01 |
| Q64475 | 20 | 3 | 5,86  | 319178                                                        | H2bc3                                  | 0 | 0,68 | 1,50E-01 |
| Q8CGP2 | 20 | 3 | 5,86  | 319188                                                        | Hist1h2b<br>p                          | 0 | 0,68 | 1,50E-01 |
| Q64525 | 20 | 3 | 5,86  | 319189                                                        | Hist2h2b<br>b                          | 0 | 0,68 | 1,50E-01 |
| Q8CGP1 | 20 | 3 | 5,86  | 319184                                                        | H2bc12                                 | 0 | 0,68 | 1,50E-01 |
| P10854 | 20 | 3 | 5,86  | 319186                                                        | H2bc14                                 | 0 | 0,68 | 1,50E-01 |
| Q64478 | 20 | 3 | 5,86  | 319182                                                        | H2bc9                                  | 0 | 0,68 | 1,50E-01 |
| Q6ZWY9 | 20 | 3 | 5,86  | 319179;<br>319181;<br>68024                                   | H2bc4;<br>H2bc6;<br>H2bc8              | 0 | 0,68 | 1,50E-01 |
| P10853 | 20 | 3 | 5,86  | 319180;<br>319183;<br>319185;<br>319187;<br>665596;<br>665622 | H2bc11;<br>H2bc13;<br>H2bc15;<br>H2bc7 | 0 | 0,68 | 1,50E-01 |
| Q91XD7 | 5  | 2 | 9,05  | 171508                                                        | Creld1                                 | 0 | 0,82 | 8,53E-01 |
| Q9JL26 | 2  | 2 | 10,15 | 57778                                                         | Fmnl1                                  | 0 | 1,23 | 9,05E-01 |
| P70188 | 4  | 3 | 5,82  | 16579                                                         | Kifap3                                 | 0 | 1,29 | 8,85E-01 |
| Q6P5E4 | 2  | 3 | 3,65  | 320011                                                        | Uggt1                                  | 0 | 0,58 | 4,13E-01 |
| Q91VR5 | 3  | 2 | 6,21  | 104721                                                        | Ddx1                                   | 0 | 0,93 | 9,76E-01 |
| Q99KI3 | 15 | 3 | 0     | 66087                                                         | Emc3                                   | 0 | 1,12 | 9,76E-01 |
| Q91YD9 | 5  | 3 | 15,77 | 73178                                                         | Wasl                                   | 0 | 1,07 | 9,74E-01 |
| Q7TPS5 | 2  | 2 | 1,83  | 74741                                                         | C2cd5                                  | 0 | 1,17 | 9,64E-01 |
| Q9JIF7 | 5  | 3 | 0     | 70349                                                         | Copb1                                  | 0 | 0,95 | 9,76E-01 |
| Q8VD62 | 8  | 2 | 9,3   | 107242                                                        | Bles03                                 | 0 | 1,05 | 9,91E-01 |
| P15920 | 2  | 2 | 34,07 | 21871                                                         | Atp6v0a2                               | 0 | 0,89 | 8,42E-01 |
| P42225 | 3  | 2 | 1,85  |                                                               | Stat1                                  | 0 | 1,23 | 9,50E-01 |
| Q8BYN5 | 5  | 2 | 6,9   | 319636                                                        | Fsd11                                  | 0 | 0,90 | 9,56E-01 |
| Q9JIM1 | 5  | 2 | 20,46 | 63959                                                         | Slc29a1                                | 0 | 1,13 | 9,65E-01 |
| Q99LB2 | 10 | 3 | 1,78  | 28200                                                         | Dhrs4                                  | 0 | 1,22 | 9,56E-01 |
| Q9DCC8 | 17 | 2 | 2,41  | 67952                                                         | Tomm20                                 | 0 | 1,43 | 3,20E-01 |
| P36536 | 10 | 2 | 22,72 |                                                               | Sar1a                                  | 0 | 1,23 | 7,60E-01 |
| Q61234 | 5  | 2 | 7,95  |                                                               | Snta1                                  | 1 | 0,70 | 3,58E-01 |
| Q80U19 | 3  | 3 | 3,95  | 76441                                                         | Daam2                                  | 0 | 0,53 | 3,19E-01 |
| Q9JMK2 | 6  | 2 | 2,07  | 27373                                                         | Csnk1e                                 | 0 | 1,68 | 4,08E-01 |
| Q923Z0 | 9  | 3 | 0     | 64297                                                         | Gprc5b                                 | 0 | 1,09 | 9,76E-01 |
| Q9CXI0 | 11 | 3 | 0     | 52064                                                         | Coq5                                   | 0 | 0,57 | 3,44E-01 |
| P40630 | 11 | 3 | 3,68  | 21780                                                         | Tfam                                   | 0 | 0,98 | 9,94E-01 |
| E9Q8I9 | 1  | 4 | 0     | 320365                                                        | Fry                                    | 0 | 1,27 | 8,93E-01 |
| Q5XJY5 | 7  | 3 | 0     | 213827                                                        | Arcn1                                  | 0 | 1,34 | 5,88E-01 |
| P24668 | 8  | 2 | 10,7  | 17113                                                         | M6pr                                   | 0 | 0,45 | 1,77E-02 |
| O70274 | 13 | 2 | 2,14  | 19244                                                         | Ptp4a2                                 | 0 | 1,19 | 9,36E-01 |
| Q63739 | 13 | 2 | 2,14  | 19243                                                         | Ptp4a1                                 | 0 | 1,19 | 9,36E-01 |
| Q7TSI3 | 5  | 2 | 0     | 243819                                                        | Ppp6r1                                 | 0 | 1,10 | 9,76E-01 |

|         |    |   |       |                  |          |   |      |          |
|---------|----|---|-------|------------------|----------|---|------|----------|
| Q8C0J2  | 3  | 2 | 5,88  | 77040            | Atg16l1  | 0 | 1,42 | 7,74E-01 |
| Q0VVGU4 | 7  | 3 | 1,92  | 381677           | Vgf      | 0 | 1,10 | 9,76E-01 |
| P70280  | 11 | 3 | 12,46 | 20955            | Vamp7    | 0 | 1,82 | 1,23E-01 |
| Q8VIM9  | 4  | 2 | 11,41 | 210146           | Irgq     | 0 | 1,22 | 9,19E-01 |
| Q9WVJ5  | 15 | 3 | 1,63  | 12960            | Crybb1   | 0 | 1,49 | 1,14E-01 |
| Q80TM9  | 2  | 2 | 7,09  | 64652            | Nisch    | 0 | 0,99 | 9,92E-01 |
| O54734  | 7  | 3 | 4,21  | 13200            | Ddost    | 0 | 1,00 | 9,96E-01 |
| P97742  | 5  | 3 | 3,41  | 12894            | Cpt1a    | 0 | 0,90 | 9,56E-01 |
| Q8VVK1  | 9  | 3 | 0     | 27045            | Nit1     | 0 | 1,94 | 1,93E-01 |
| Q8BTZ7  | 9  | 3 | 5,73  | 331026           | Gmppb    | 0 | 0,80 | 8,21E-01 |
| Q8K2P7  | 4  | 2 | 1,93  | 105727           | Slc38a1  | 0 | 1,72 | 3,40E-01 |
| Q8BX94  | 11 | 2 | 5     | 228983           | Osbpl2   | 0 |      |          |
| Q9CXV1  | 11 | 2 | 2,17  | 66925            | Sdhd     | 0 | 1,09 | 9,76E-01 |
| Q9D1D4  | 11 | 2 | 0     | 68581            | Tmed10   | 0 | 1,12 | 9,76E-01 |
| Q8CJ61  | 9  | 2 | 17,04 | 97487            | Cmtm4    | 0 | 1,24 | 8,66E-01 |
| Q8BGK5  | 11 | 2 | 3,32  | 215085           | Slc35f1  | 0 | 0,76 | 8,08E-01 |
| Q9D328  | 14 | 2 | 2,08  | 67564            | Tmem35a  | 0 | 1,10 | 9,74E-01 |
| P56376  | 27 | 2 | 7,97  | 66204            | Acyp1    | 0 | 1,34 | 8,07E-01 |
| Q80Y55  | 8  | 3 | 1,69  | 100383           | Bsdcl    | 0 | 1,00 | 9,97E-01 |
| Q8VCM8  | 5  | 3 | 7,28  | 103425           | Ncln     | 0 | 1,07 | 9,76E-01 |
| Q8VD75  | 4  | 2 | 1,69  | 215114           | Hip1     | 0 |      |          |
| Q8R2Y8  | 18 | 2 | 1,6   | 217057           | Pthr2    | 0 | 1,10 | 9,76E-01 |
| P26516  | 7  | 2 | 4,11  | 17463            | Psmd7    | 0 | 1,01 | 1,00E+00 |
| Q9JJR8  | 15 | 3 | 12,27 | 56786            | Tmem9b   | 0 | 1,19 | 9,43E-01 |
| P61979  | 6  | 2 | 2,52  | 15387            | Hnrmpk   | 0 | 1,01 | 9,98E-01 |
| P05555  | 3  | 3 | 0     |                  | Itgam    | 0 | 0,49 | 1,83E-01 |
| Q8C5W3  | 8  | 3 | 1,62  | 272589           | Tbcel    | 0 | 1,14 | 9,24E-01 |
| Q6GYP7  | 1  | 2 | 1,78  | 56784            | Ralgapa1 | 0 | 1,34 | 8,95E-01 |
| Q8R0Y8  | 10 | 3 | 13,35 | 73095            | Slc25a42 | 0 | 0,56 | 2,79E-02 |
| Q5RKR3  | 5  | 3 | 1,89  | 320563           | Islr2    | 0 | 0,96 | 9,78E-01 |
| Q6PD26  | 4  | 2 | 3,87  | 276846           | Pigs     | 0 | 1,04 | 9,94E-01 |
| P56382  | 44 | 3 | 34,39 | 67126            | Atp5fle  | 0 | 1,04 | 9,85E-01 |
| O08914  | 5  | 3 | 3,68  | 14073            | Faah     | 0 | 0,68 | 6,07E-01 |
| P61211  | 11 | 2 | 9,88  | 104303           | Arl1     | 0 | 1,11 | 9,74E-01 |
| P21300  | 9  | 2 | 22,48 | 11997            | Akr1b7   | 0 | 0,92 | 9,66E-01 |
| P62069  | 6  | 2 | 11,34 | 69727            | Usp46    | 0 | 1,26 | 8,07E-01 |
| P31230  | 9  | 2 | 3,7   |                  | Aimp1    | 0 | 0,32 | 2,16E-02 |
| Q920P5  | 4  | 2 | 9,26  | 229949           | Ak5      | 0 | 1,08 | 9,83E-01 |
| Q8K3W0  | 10 | 3 | 0     | 107976           | Babam2   | 0 | 1,08 | 9,87E-01 |
| Q9CZN7  | 5  | 3 | 0     | 108037           | Shmt2    | 0 | 1,33 | 7,84E-01 |
| Q9DB72  | 8  | 2 | 2,15  | 72014            | Btbd17   | 0 | 0,00 | 1,60E-16 |
| O70585  | 4  | 3 | 7,41  | 13528            | Dtnb     | 0 | 1,06 | 9,76E-01 |
| O35598  | 3  | 2 | 1,87  | 11487            | Adam10   | 0 | 0,57 | 3,61E-01 |
| Q62186  | 12 | 2 | 12,77 | 20832            | Ssr4     | 0 | 1,41 | 7,10E-01 |
| P0C027  | 18 | 2 | 1,65  | 102954;<br>58242 | Nudt10   | 0 | 1,29 | 8,42E-01 |
| Q8C080  | 7  | 2 | 3,72  | 74718            | Snx16    | 0 | 1,04 | 9,87E-01 |

|        |    |   |       |                                                                                                |                                   |   |         |          |
|--------|----|---|-------|------------------------------------------------------------------------------------------------|-----------------------------------|---|---------|----------|
| Q8QZY1 | 6  | 3 | 0     | 223691                                                                                         | Eif3l                             | 0 | 0,99    | 9,85E-01 |
| Q9CPS6 | 15 | 2 | 23,04 | 66847                                                                                          | Hint3                             | 0 | 1,20    | 8,64E-01 |
| Q9JIA7 | 6  | 2 | 1,91  | 56632                                                                                          | Sphk2                             | 0 | 1000,00 | 1,60E-16 |
| Q9D8B7 | 9  | 3 | 7,29  | 83964                                                                                          | Jam3                              | 0 | 1,37    | 4,35E-01 |
| O55029 | 4  | 3 | 2,12  | 50797                                                                                          | Copb2                             | 0 | 1,18    | 9,63E-01 |
| Q922H2 | 5  | 2 | 19,19 | 236900                                                                                         | Pdk3                              | 0 | 0,94    | 9,76E-01 |
| Q6PHU5 | 3  | 2 | 5,53  | 20661                                                                                          | Sort1                             | 0 | 0,76    | 8,17E-01 |
| Q6V4S5 | 2  | 4 | 0     | 237979                                                                                         | Sdk2                              | 0 | 1,21    | 9,34E-01 |
| Q810J8 | 5  | 3 | 1,65  | 217695                                                                                         | Zfyve1                            | 0 | 1,08    | 9,74E-01 |
| Q6ZPF4 | 3  | 3 | 0     | 22379                                                                                          | Fmnl3                             | 0 | 0,97    | 9,77E-01 |
| Q5SSH7 | 1  | 3 | 0     | 195018                                                                                         | Zzef1                             | 0 | 1,23    | 9,09E-01 |
| Q9CWU6 | 9  | 2 | 5,48  | 56046                                                                                          | Uqcc1                             | 0 | 0,76    | 7,49E-01 |
| Q8K2C6 | 7  | 2 | 0     | 68346                                                                                          | Sirt5                             | 0 | 1,37    | 7,63E-01 |
| Q8K394 | 3  | 3 | 4,19  | 224860                                                                                         | Plcl2                             | 0 | 1,26    | 8,91E-01 |
| Q921G8 | 4  | 3 | 0     | 74237                                                                                          | Tubgcp2                           | 0 | 1,41    | 8,52E-01 |
| P35979 | 15 | 2 | 20,5  | 269261                                                                                         | Rpl12                             | 0 | 0,83    | 8,68E-01 |
| Q9ES89 | 7  | 2 | 1,61  | 58193                                                                                          | Extl2                             | 0 | 1,15    | 9,34E-01 |
| Q8K353 | 11 | 2 | 9,16  |                                                                                                | Cystm1                            | 0 | 1,11    | 9,76E-01 |
| Q8VCR2 | 8  | 3 | 1,81  | 243168                                                                                         | Hsd17b13                          | 0 | 0,91    | 9,74E-01 |
| Q9DBX3 | 2  | 2 | 16,16 | 71733                                                                                          | Susd2                             | 0 | 0,95    | 9,76E-01 |
| Q9D7V2 | 10 | 2 | 5,42  | 70082                                                                                          | Lysmd2                            | 0 | 1,24    | 8,85E-01 |
| Q8BK63 | 9  | 3 | 0     |                                                                                                | Csnk1a1                           | 0 | 1,05    | 9,87E-01 |
| Q9WUP7 | 10 | 3 | 1,63  | 56207                                                                                          | Uchl5                             | 0 | 0,91    | 9,71E-01 |
| P35285 | 11 | 2 | 10,46 | 19334                                                                                          | Rab22a                            | 0 | 0,77    | 7,93E-01 |
| Q8BGY2 | 18 | 3 | 6,05  | 208691                                                                                         | Eif5a2                            | 0 | 0,84    | 8,82E-01 |
| Q64455 | 3  | 3 | 0     | 19271                                                                                          | Ptpnj                             | 0 | 0,72    | 7,49E-01 |
| Q64523 | 12 | 2 | 12,7  | 319176                                                                                         | H2ac20                            | 0 | 0,93    | 9,64E-01 |
| Q8BFU2 | 12 | 2 | 12,7  | 319162                                                                                         | H2aw                              | 0 | 0,93    | 9,64E-01 |
| Q3THW5 | 13 | 2 | 12,7  | 77605                                                                                          | H2az2                             | 0 | 0,93    | 9,64E-01 |
| C0HKE3 | 12 | 2 | 12,7  | 319164;<br>319165;<br>319166;<br>319167;<br>319170;<br>319171;<br>319172;<br>319191;<br>665433 | H2ac7                             | 0 | 0,93    | 9,64E-01 |
| P0C0S6 | 13 | 2 | 12,7  | 51788                                                                                          | H2az1                             | 0 | 0,93    | 9,64E-01 |
| Q8CGP5 | 12 | 2 | 12,7  | 319173                                                                                         | Hist1h2af                         | 0 | 0,93    | 9,64E-01 |
| Q8R1M2 | 12 | 2 | 12,7  | 232440                                                                                         | H2aj                              | 0 | 0,93    | 9,64E-01 |
| P27661 | 11 | 2 | 12,7  | 15270                                                                                          | H2ax                              | 0 | 0,93    | 9,64E-01 |
| Q8CGP7 | 12 | 2 | 12,7  | 319169                                                                                         | H2ac15                            | 0 | 0,93    | 9,64E-01 |
| Q8CGP6 | 13 | 2 | 12,7  | 319168                                                                                         | H2ac12                            | 0 | 0,93    | 9,64E-01 |
| Q6GSS7 | 12 | 2 | 12,7  | 15267;<br>319192                                                                               | Hist2h2aa<br>1;<br>Hist2h2aa<br>2 | 0 | 0,93    | 9,64E-01 |
| Q9QYB1 | 8  | 2 | 18,21 | 29876                                                                                          | Clic4                             | 0 | 1,07    | 9,83E-01 |
| Q7TMC8 | 2  | 2 | 5,36  | 234730                                                                                         | Fcsk                              | 0 | 1000,00 | 1,60E-16 |

|        |    |   |       |        |          |   |         |          |
|--------|----|---|-------|--------|----------|---|---------|----------|
| Q91ZH7 | 6  | 2 | 5,61  | 106861 | Abhd3    | 0 |         |          |
| Q99MK8 | 3  | 2 | 3,54  | 110355 | Grk2     | 0 | 0,94    | 9,74E-01 |
| Q3UYH7 | 3  | 2 | 3,54  | 320129 | Adrbk2   | 0 | 0,94    | 9,74E-01 |
| P47963 | 9  | 2 | 0     | 270106 | Rpl13    | 0 | 1,05    | 9,94E-01 |
| P59764 | 1  | 2 | 1,66  | 238130 | Dock4    | 0 | 0,68    | 7,09E-01 |
| Q8VDZ4 | 4  | 2 | 1,84  | 228136 | Zdhhc5   | 0 | 1000,00 | 1,60E-16 |
| Q9DB15 | 13 | 2 | 4,32  | 56282  | Mrpl12   | 0 | 2,74    | 6,20E-05 |
| P63213 | 41 | 2 | 8,52  | 14702  | Gng2     | 0 | 0,81    | 8,85E-01 |
| Q78JN3 | 8  | 2 | 10,77 | 69123  | Eci3     | 0 | 0,88    | 9,56E-01 |
| P21661 | 4  | 2 | 0     | 18549  | Pcsk2    | 0 | 0,99    | 9,96E-01 |
| Q9CQ65 | 10 | 2 | 3,93  | 66902  | Mtap     | 0 | 1,40    | 7,86E-01 |
| Q920R6 | 2  | 2 | 32,38 | 140494 | Atp6v0a4 | 0 | 0,85    | 7,61E-01 |
| Q8R0F8 | 13 | 2 | 0     | 68636  | Fahd1    | 0 | 1,25    | 9,16E-01 |
| Q60770 | 6  | 3 | 0     | 20912  | Stxbp3   | 0 | 0,85    | 9,34E-01 |
| Q8BGB7 | 8  | 2 | 18,94 | 67870  | Enoph1   | 0 | 1,07    | 9,76E-01 |
| Q9CQE8 | 10 | 2 | 1,75  | 68045  | RTRAF    | 0 | 1,74    | 4,49E-01 |
| P70333 | 7  | 2 | 0     | 56258  | Hnrmp2   | 0 | 0,74    | 7,89E-01 |
| O35737 | 7  | 2 | 0     | 59013  | Hnrmp1   | 0 | 0,74    | 7,89E-01 |
| Q8BHG2 | 18 | 2 | 4,2   | 74098  | Czib     | 0 | 0,83    | 8,24E-01 |
| Q80Y98 | 4  | 3 | 1,75  | 72108  | Ddhd2    | 0 | 1,11    | 9,76E-01 |
| Q8BMD8 | 5  | 2 | 9,76  | 229731 | Slc25a24 | 0 | 1,16    | 9,66E-01 |
| P0C5J4 | 5  | 2 | 0     | 620246 | Gpr52    | 0 | 1,75    | 2,49E-01 |
| P70211 | 2  | 3 | 1,73  | 13176  | Dcc      | 0 | 1,53    | 6,94E-01 |
| Q9CZX7 | 14 | 2 | 1,7   | 72519  | Pip4p2   | 0 | 0,65    | 5,79E-01 |
| Q9D1E8 | 6  | 2 | 13,67 | 52123  | Agpat5   | 0 | 0,78    | 7,74E-01 |
| Q8BH86 | 6  | 3 | 0     | 217830 | Dglucy   | 0 | 1,07    | 9,76E-01 |
| O88597 | 4  | 2 | 5,72  | 56208  | Becn1    | 0 | 0,60    | 2,31E-01 |
| P70663 | 3  | 2 | 0     | 13602  | Sparcl1  | 0 | 0,79    | 8,52E-01 |
| Q3TFQ1 | 11 | 2 | 12,86 | 66674  | Spryd7   | 0 | 1,34    | 8,01E-01 |
| P63056 | 4  | 2 | 10,04 | 229759 | Olfm3    | 0 | 1,05    | 9,97E-01 |
| P00848 | 8  | 2 | 9,97  | 17705  | Mtatp6   | 0 | 0,78    | 7,50E-01 |
| Q9QUH0 | 31 | 3 | 0     | 93692  | Glrx     | 0 | 1,09    | 9,76E-01 |
| Q7TN79 | 9  | 3 | 0     | 432442 | Akap7    | 0 | 1,34    | 7,61E-01 |
| O55074 | 36 | 3 | 0     | 432442 | Akap7    | 0 | 1,34    | 7,61E-01 |
| Q9JKW0 | 9  | 2 | 9,41  | 54208  | Arl6ip1  | 0 | 0,96    | 9,74E-01 |
| Q8BGP6 | 11 | 3 | 1,71  | 319653 | Slc25a40 | 0 | 1,05    | 9,96E-01 |
| Q8BP00 | 4  | 2 | 0     | 320299 | Iqcb1    | 0 | 1,56    | 6,72E-01 |
| Q9JLQ2 | 2  | 2 | 5,61  | 26431  | Git2     | 0 | 1,11    | 9,56E-01 |
| Q8CCN5 | 3  | 2 | 0     | 192197 | Bcas3    | 0 | 0,47    | 1,70E-02 |
| Q8K1A6 | 3  | 2 | 3,27  | 212139 | Cc2d1a   | 0 | 0,92    | 9,27E-01 |
| Q9Z1Q9 | 2  | 2 | 1,65  | 22321  | Vars1    | 0 | 0,85    | 9,56E-01 |
| Q6ZPF3 | 2  | 2 | 1,82  | 24001  | Tiam2    | 0 | 1,26    | 9,37E-01 |
| Q8K1S4 | 3  | 2 | 3,51  | 107448 | Unc5a    | 0 | 0,83    | 9,35E-01 |
| Q9D2N9 | 4  | 3 | 0     | 77573  | Vps33a   | 0 | 1,32    | 7,37E-01 |
| Q8K010 | 3  | 3 | 0     | 75475  | Oplah    | 0 | 0,70    | 6,98E-01 |
| Q9Z1K5 | 5  | 2 | 6,01  | 23806  | Arih1    | 0 |         |          |
| P70290 | 6  | 2 | 2,17  | 17524  | Mpp1     | 0 | 0,61    | 5,27E-01 |

|        |    |   |       |        |          |   |         |          |
|--------|----|---|-------|--------|----------|---|---------|----------|
| P08030 | 13 | 2 | 0     | 11821  | Aprt     | 0 | 1,07    | 9,76E-01 |
| P27659 | 7  | 3 | 0     | 27367  | Rpl3     | 0 | 0,88    | 9,56E-01 |
| P61804 | 19 | 2 | 0     | 13135  | Dad1     | 0 | 1,00    | 9,99E-01 |
| Q9D1M0 | 11 | 2 | 8,74  | 110379 | Sec13    | 0 | 1,13    | 9,74E-01 |
| Q91XD6 | 6  | 2 | 2,05  | 70160  | Vps36    | 0 | 1,21    | 9,34E-01 |
| Q99LS3 | 9  | 2 | 0     | 100678 | Psph     | 0 | 1,12    | 9,76E-01 |
| P97412 | 1  | 3 | 0     | 17101  | Lyst     | 0 | 1,74    | 5,10E-01 |
| O08739 | 4  | 3 | 0     | 11717  | Ampd3    | 0 | 0,95    | 9,77E-01 |
| P18581 | 3  | 2 | 11,03 | 11988  | Slc7a2   | 0 | 0,89    | 9,56E-01 |
| Q91VA6 | 7  | 2 | 2,16  | 67811  | Poldip2  | 0 | 0,84    | 9,16E-01 |
| Q80UP3 | 4  | 3 | 0     | 104418 | Dgkz     | 0 | 0,94    | 9,76E-01 |
| Q8BNJ6 | 4  | 2 | 0     | 74513  | Neto2    | 0 | 0,81    | 9,02E-01 |
| O54818 | 11 | 2 | 1,85  | 21987  | Tpd5211  | 0 | 29,12   | 1,60E-16 |
| Q9DBH5 | 6  | 2 | 3,45  | 66890  | Lman2    | 0 | 1,30    | 8,91E-01 |
| P56528 | 8  | 2 | 3,89  | 12494  | Cd38     | 0 | 1,55    | 6,58E-01 |
| P07146 | 15 | 2 | 1,82  | 22072  | Prss2    | 0 | 1000,00 | 1,60E-16 |
| P62075 | 26 | 2 | 1,67  | 30055  | Timm13   | 0 | 1,08    | 9,71E-01 |
| P09055 | 2  | 2 | 9,86  | 16412  | Itgb1    | 0 | 0,68    | 5,68E-01 |
| Q9JJ28 | 2  | 2 | 1,99  | 14248  | Flii     | 0 | 1,08    | 9,78E-01 |
| Q9CPT4 | 14 | 2 | 0     | 28106  | Mydgf    | 0 | 0,80    | 8,10E-01 |
| Q05915 | 11 | 3 | 1,8   | 14528  | Gch1     | 0 | 2,48    | 1,77E-02 |
| Q9QYJ3 | 6  | 2 | 3,7   | 81489  | Dnajb1   | 0 | 0,81    | 8,81E-01 |
| Q78JW9 | 6  | 2 | 3,67  | 28018  | Ubfd1    | 0 | 1,07    | 9,81E-01 |
| P97930 | 9  | 2 | 1,93  | 21915  | Dtymk    | 0 | 0,46    | 1,19E-01 |
| Q9Z2B2 | 6  | 2 | 5,47  | 20523  | Slc25a14 | 0 | 0,89    | 9,60E-01 |
| Q3TWI9 | 2  | 2 | 1,7   | 224807 | Tmem63b  | 0 | 0,00    | 1,60E-16 |
| Q5F2E8 | 2  | 2 | 13,13 | 216965 | Taok1    | 0 | 1,18    | 9,54E-01 |
| Q08642 | 4  | 2 | 3,87  | 18600  | Padi2    | 0 | 0,62    | 5,46E-01 |
| Q8BWT5 | 1  | 2 | 9,89  | 64451  | Dip2a    | 0 | 1,13    | 9,34E-01 |
| P36916 | 3  | 2 | 0     | 14670  | Gnl1     | 0 | 0,91    | 9,56E-01 |
| Q8CA71 | 9  | 2 | 2,01  | 77552  | Shisa4   | 0 | 1,26    | 8,82E-01 |
| Q9WUA6 | 5  | 2 | 0     | 23797  | Akt3     | 0 | 1,22    | 9,03E-01 |
| Q8BLV3 | 2  | 2 | 0     | 236727 | Slc9a7   | 0 | 1,14    | 9,72E-01 |
| Q8BGF9 | 10 | 3 | 0     | 229517 | Slc25a44 | 0 | 0,60    | 3,26E-02 |
| Q8C3W1 | 9  | 2 | 0     |        |          | 0 | 1,12    | 9,70E-01 |
| Q91YX5 | 6  | 2 | 9,4   | 226856 | Lpgat1   | 0 | 1,08    | 9,76E-01 |
| Q64520 | 14 | 2 | 3,44  | 14923  | Guk1     | 0 | 0,76    | 8,37E-01 |
| Q8VDU0 | 3  | 2 | 1,66  | 76123  | Gpsm2    | 0 | 1,34    | 8,07E-01 |
| Q9D2R6 | 19 | 2 | 0     | 52469  | Coa3     | 0 | 0,77    | 7,39E-01 |
| Q3TYX3 | 5  | 2 | 0     | 232187 | Smyd5    | 0 | 1,19    | 9,54E-01 |
| P46467 | 5  | 2 | 1,74  | 20479  | Vps4b    | 0 | 1,06    | 9,85E-01 |
| Q9ERK7 | 4  | 2 | 4,3   | 11444  | Chrb2    | 0 | 2,98    | 4,58E-02 |
| Q99J39 | 4  | 2 | 1,83  | 56690  | Mlycd    | 0 | 0,95    | 9,74E-01 |
| Q9CZM2 | 11 | 3 | 0     | 66480  | Rpl15    | 0 | 1,10    | 9,79E-01 |
| P60229 | 5  | 2 | 0     | 16341  | Eif3e    | 0 | 0,03    | 1,60E-16 |
| Q9WTN0 | 6  | 2 | 1,78  | 14593  | Ggps1    | 0 | 0,97    | 9,78E-01 |
| P83887 | 5  | 2 | 10,92 | 103733 | Tubg1    | 0 | 1,43    | 7,12E-01 |

|        |    |   |       |                          |          |   |         |          |
|--------|----|---|-------|--------------------------|----------|---|---------|----------|
| Q8VCK3 | 5  | 2 | 10,92 | 103768                   | Tubg2    | 0 | 1,43    | 7,12E-01 |
| Q80W54 | 7  | 3 | 0     | 230709                   | Zmpste24 | 0 | 0,54    | 1,66E-01 |
| Q9CWX2 | 8  | 2 | 1,77  | 69702                    | Ndufaf1  | 0 | 0,71    | 7,10E-01 |
| Q8R1Y2 | 10 | 2 | 3,23  | 67254                    | Bmerb1   | 0 | 1,85    | 4,72E-02 |
| Q6PHZ8 | 8  | 2 | 2,22  | 80334                    | Kcnip4   | 0 | 1,49    | 6,43E-01 |
| Q8K0T4 | 4  | 2 | 2,11  | 231912                   | Katnal1  | 0 | 0,98    | 9,87E-01 |
| Q9JKL4 | 18 | 2 | 1,7   | 66706                    | Ndufaf3  | 0 | 0,79    | 8,59E-01 |
| Q62077 | 2  | 2 | 1,72  | 18803                    | Plcg1    | 0 | 0,61    | 1,22E-01 |
| Q3V3Q7 | 2  | 2 | 6,33  | 217893                   | Pacs2    | 0 | 0,65    | 3,85E-01 |
| Q5F285 | 33 | 2 | 5,88  | 69186                    | Tmem256  | 0 | 1,02    | 1,00E+00 |
| O55028 | 6  | 2 | 0     | 12041                    | Bckdk    | 0 | 0,87    | 9,17E-01 |
| Q3UI43 | 6  | 2 | 4,93  | 68251                    | Babam1   | 0 | 1,23    | 8,95E-01 |
| Q3UJP5 | 13 | 2 | 0     |                          |          | 0 | 0,88    | 9,71E-01 |
| Q64373 | 8  | 2 | 5,47  | 12048                    | Bcl2l1   | 0 | 1,17    | 9,48E-01 |
| Q99P31 | 6  | 2 | 0     | 66245                    | Hspbp1   | 0 | 1,12    | 9,72E-01 |
| Q8VE22 | 11 | 2 | 1,8   | 64656                    | Mrps23   | 0 | 1000,00 | 1,60E-16 |
| P00015 | 14 | 3 | 3,6   | 13067                    | Cyct     | 0 | 0,93    | 9,40E-01 |
| Q8BP40 | 6  | 2 | 2,03  | 66659                    | Acp6     | 0 | 0,82    | 8,40E-01 |
| Q920A7 | 2  | 2 | 3,85  | 114896                   | Afg3l1   | 0 | 0,00    | 1,60E-16 |
| Q9CY50 | 7  | 2 | 3,38  | 107513                   | Ssr1     | 0 | 0,76    | 6,06E-01 |
| Q3UIF9 | 7  | 2 | 0     | 94212                    | Pag1     | 0 | 0,31    | 4,18E-03 |
| P26450 | 3  | 2 | 5,49  | 18708                    | Pik3r1   | 0 | 0,76    | 7,50E-01 |
| Q8BJH1 | 10 | 2 | 0     | 67306                    | Zc2hc1a  | 0 | 2,43    | 5,80E-02 |
| Q6TEK5 | 12 | 2 | 3,8   | 69568                    | Vkorc1l1 | 0 | 1,23    | 9,48E-01 |
| Q9CR09 | 11 | 2 | 8,01  | 66155                    | Ufc1     | 0 | 1,04    | 9,94E-01 |
| Q9QZD9 | 6  | 2 | 1,65  | 54709                    | Eif3i    | 0 | 1,01    | 1,00E+00 |
| Q60766 | 5  | 2 | 1,72  | 15944                    | Irgm1    | 0 | 1,08    | 9,85E-01 |
| P09925 | 6  | 2 | 2,36  | 20930                    | Surf1    | 0 | 0,74    | 7,86E-01 |
| P70696 | 13 | 2 | 5,86  | 319177                   | H2bc1    | 0 | 0,68    | 1,66E-01 |
| Q9WTL4 | 1  | 2 | 59,67 | 23920                    | Insrr    | 0 | 0,99    | 9,91E-01 |
| Q8C052 | 3  | 2 | 11,86 | 270058                   | Map1s    | 0 | 1,25    | 9,11E-01 |
| O35417 | 6  | 2 | 8,99  |                          | Pdyn     | 0 | 1,21    | 9,25E-01 |
| Q9WTQ8 | 13 | 2 | 3,8   |                          | Timm23   | 0 | 1,02    | 9,91E-01 |
| O88851 | 15 | 2 | 0     | 26450                    | Rbbp9    | 0 | 1000,00 | 1,60E-16 |
| Q8BHL8 | 8  | 2 | 0     | 228769                   | Psmf1    | 0 | 1,02    | 1,00E+00 |
| Q8BH70 | 3  | 2 | 3,39  | 269514                   | Fbxl4    | 0 | 1,22    | 8,91E-01 |
| Q8CGV2 | 5  | 2 | 0     | 216343                   | Tph2     | 0 | 0,62    | 5,45E-01 |
| Q6ZWN5 | 9  | 2 | 4,67  | 76846                    | Rps9     | 0 | 0,59    | 4,80E-01 |
| Q80VP9 | 7  | 2 | 0     | 72898                    | Asphd2   | 0 | 0,01    | 1,60E-16 |
| O55242 | 9  | 2 | 2,01  | 18391                    | Sigmar1  | 0 | 0,04    | 1,60E-16 |
| P51175 | 5  | 2 | 0     | 19044                    | Ppox     | 0 | 0,92    | 9,74E-01 |
| Q9R1J0 | 7  | 2 | 1,71  | 18194                    | Nsdhl    | 0 | 1,04    | 9,96E-01 |
| P58044 | 7  | 2 | 1,65  | 102635<br>781;<br>319554 | Idi1     | 0 | 1,32    | 8,12E-01 |
| Q8BH00 | 2  | 2 | 9,05  | 237320                   | Aldh8a1  | 0 | 0,00    | 1,60E-16 |
| S4R1M9 | 3  | 2 | 1,67  | 74486                    | Osbpl10  | 0 | 1,20    | 9,44E-01 |

|        |    |   |       |        |           |   |      |          |
|--------|----|---|-------|--------|-----------|---|------|----------|
| P70335 | 1  | 2 | 4,21  | 19877  | Rock1     | 0 | 0,77 | 8,42E-01 |
| Q3UHD2 | 5  | 2 | 0     | 328232 | Gfod1     | 0 | 1,01 | 1,00E+00 |
| O88569 | 7  | 2 | 1,62  | 53379  | Hnrnpa2b1 | 0 | 0,63 | 5,69E-01 |
| Q9D0E3 | 13 | 2 | 1,7   | 217779 | Lysmd1    | 0 | 1,01 | 1,00E+00 |
| Q5DU31 | 7  | 2 | 0     | 320495 | Ipcef1    | 0 | 1,33 | 8,45E-01 |
| Q08274 | 3  | 2 | 6,73  | 13401  | Dmwd      | 0 | 1,65 | 5,13E-01 |
| Q61733 | 4  | 2 | 0     | 57312  | Mrps31    | 0 | 0,64 | 4,24E-01 |
| Q80V42 | 5  | 2 | 3,66  | 70574  | Cpm       | 0 | 0,59 | 4,83E-01 |
| Q08460 | 2  | 2 | 5,34  | 16531  | Kcnma1    | 0 | 0,80 | 8,40E-01 |
| Q3TMH2 | 6  | 2 | 0     | 74616  | Scrn3     | 0 |      |          |
| Q61361 | 2  | 2 | 0     | 12032  | Bcan      | 0 | 1,32 | 8,17E-01 |
| A2RSJ4 | 2  | 2 | 1,75  | 75089  | Uhrf1bp1  | 0 | 1,19 | 9,34E-01 |
| Q6PDI6 | 5  | 2 | 0     | 235461 | Mindy2    | 0 | 2,09 | 3,39E-01 |
| Q8C8T8 | 9  | 2 | 1,6   | 69499  | Tsr2      | 0 | 1,98 | 1,71E-01 |
| P70124 | 5  | 2 | 1,64  | 20724  | Serpinb5  | 0 | 0,33 | 3,07E-03 |
| Q64444 | 7  | 2 | 0     | 12351  | Ca4       | 0 | 4,76 | 4,83E-06 |
| Q4JIM5 | 2  | 2 | 3,66  |        | Abl2      | 0 | 1,05 | 9,85E-01 |
| Q69ZS8 | 3  | 2 | 0     | 71529  | Kazn      | 0 |      |          |
| Q9R0M6 | 12 | 2 | 3,29  | 56382  | Rab9a     | 0 | 0,96 | 9,76E-01 |
| P61329 | 7  | 2 | 17,09 | 14167  | Fgf12     | 0 | 0,95 | 9,76E-01 |
| P70379 | 6  | 2 | 17,09 | 14169  | Fgf14     | 0 | 0,95 | 9,76E-01 |
| Q91WB7 | 9  | 2 | 0     | 226122 | Ubt1      | 0 | 0,57 | 4,76E-01 |
| Q6PGH0 | 9  | 2 | 0     | 327900 | Ubt2      | 0 | 0,57 | 4,76E-01 |
| P54818 | 4  | 2 | 2,11  | 14420  | Galc      | 0 | 0,34 | 2,46E-02 |
| Q8VI51 | 1  | 2 | 5,83  | 66673  | Sorcs3    | 0 | 3,04 | 2,03E-03 |
| P54726 | 5  | 2 | 7,29  | 19358  | Rad23a    | 0 | 0,98 | 9,87E-01 |
| Q9CQ91 | 21 | 2 | 0     | 66091  | Ndufa3    | 0 | 0,81 | 8,91E-01 |
| Q63829 | 10 | 2 | 1,82  | 12238  | Commd3    | 0 | 1,88 | 3,18E-01 |
| Q8CF89 | 5  | 2 | 0     | 66513  | Tab1      | 0 | 0,55 | 4,46E-01 |
| Q8R1X6 | 5  | 2 | 0     | 229285 | Spart     | 0 | 1,01 | 9,99E-01 |
| P46737 | 9  | 2 | 14,79 | 210766 | Brcc3     | 0 | 0,96 | 9,76E-01 |
| Q3U186 | 3  | 2 | 1,68  | 109093 | Rars2     | 0 | 0,37 | 4,69E-03 |
| Q8BGF6 | 6  | 2 | 0     | 244548 | Elmod2    | 0 | 0,65 | 4,76E-01 |
| Q921W0 | 9  | 2 | 1,74  | 234852 | Chmp1a    | 0 | 1,04 | 9,96E-01 |
| Q8BQM8 | 1  | 2 | 1,65  | 319670 | Eml5      | 0 | 0,88 | 9,56E-01 |
| P97429 | 6  | 2 | 0     | 11746  | Anxa4     | 0 | 0,00 | 1,60E-16 |
| Q9D061 | 7  | 2 | 0     | 72482  | Acbd6     | 0 | 1,26 | 9,12E-01 |
| P70452 | 7  | 2 | 0     | 20909  | Stx4      | 0 | 3,36 | 9,45E-04 |
| O35393 | 6  | 2 | 0     | 13643  | Efnb3     | 0 | 0,45 | 1,12E-02 |
| O89116 | 8  | 2 | 5,13  | 53611  | Vt1a      | 0 | 0,89 | 9,34E-01 |
| Q6P3D0 | 9  | 2 | 0     | 75686  | Nudt16    | 0 | 1,46 | 8,08E-01 |
| Q922H4 | 6  | 2 | 2,04  | 69080  | Gmppa     | 0 | 1,26 | 8,65E-01 |
| Q9D6E4 | 12 | 2 | 0     | 73032  | Ttc9b     | 0 | 1,10 | 9,76E-01 |
| Q91W43 | 2  | 2 | 0     | 104174 | Gldc      | 0 | 0,00 | 1,60E-16 |
| Q8K1J6 | 7  | 2 | 0     | 70047  | Trnt1     | 0 |      |          |
| O35459 | 6  | 2 | 1,73  | 51798  | Ech1      | 0 | 0,51 | 8,31E-02 |



|                |    |   |       |                                                                                   |                                                                        |   |         |          |
|----------------|----|---|-------|-----------------------------------------------------------------------------------|------------------------------------------------------------------------|---|---------|----------|
| P59325         | 4  | 2 | 0     | 217869                                                                            | Eif5                                                                   | 0 | 1,84    | 2,31E-01 |
| Q3USB7         | 4  | 2 | 1,69  | 227120                                                                            | Plcl1                                                                  | 0 | 0,00    | 1,60E-16 |
| Q99PW8         | 3  | 2 | 0     | 16559                                                                             | Kif17                                                                  | 0 | 0,91    | 9,74E-01 |
| P25444         | 6  | 2 | 0     | 16898                                                                             | Rps2                                                                   | 0 | 0,30    | 8,66E-05 |
| O89001         | 1  | 2 | 0     | 12874                                                                             | Cpd                                                                    | 0 | 0,00    | 1,60E-16 |
| Q9WUT3         | 3  | 2 | 0     | 20112                                                                             | Rps6ka2                                                                | 0 | 1,96    | 2,47E-01 |
| P18653         | 3  | 2 | 0     | 20111                                                                             | Rps6ka1                                                                | 0 | 1,96    | 2,47E-01 |
| P18654         | 3  | 2 | 0     | 110651                                                                            | Rps6ka3                                                                | 0 | 1,96    | 2,47E-01 |
| Q9CQ80         | 10 | 2 | 0     | 28084                                                                             | Vps25                                                                  | 0 | 0,90    | 9,67E-01 |
| Q91VH6         | 5  | 2 | 1,69  | 76890                                                                             | Memo1                                                                  | 0 | 1,97    | 2,41E-01 |
| Q6PAM0         | 7  | 2 | 0     | 108097                                                                            | Prkab2                                                                 | 0 | 0,87    | 9,55E-01 |
| P15388         | 4  | 2 | 1,64  | 16502                                                                             | Kcnc1                                                                  | 0 | 0,92    | 9,76E-01 |
| Q9D273         | 8  | 2 | 0     | 77697                                                                             | Mmab                                                                   | 0 | 25,88   | 1,60E-16 |
| Q8BR90         | 6  | 2 | 10,68 |                                                                                   |                                                                        | 0 | 0,99    | 9,91E-01 |
| Q8BR86         | 3  | 2 | 1,62  | 67703                                                                             | Kirrel3                                                                | 0 | 1,25    | 8,82E-01 |
| Q3UQ84         | 3  | 2 | 0     | 71807                                                                             | Tars2                                                                  | 0 | 1,23    | 8,95E-01 |
| Q68FE2         | 4  | 2 | 0     | 245860                                                                            | Atg9a                                                                  | 0 | 0,34    | 1,32E-02 |
| Q8HW98         | 8  | 2 | 0     | 210094                                                                            | Iglon5                                                                 | 0 | 0,98    | 9,87E-01 |
| Q9CR98         | 12 | 2 | 7,66  | 66488                                                                             | Fam136a                                                                | 0 | 0,73    | 6,93E-01 |
| Q9Z1Q5         | 11 | 2 | 0     | 114584                                                                            | Clic1                                                                  | 0 | 0,00    | 1,60E-16 |
| Q9D0J4         | 11 | 2 | 0     | 56327                                                                             | Arl2                                                                   | 0 | 1,44    | 8,31E-01 |
| Q3UUF8         | 5  | 2 | 0     | 218440                                                                            | Ankrd34b                                                               | 0 | 4,25    | 6,22E-06 |
| Q8C4Q6         | 9  | 2 | 0     | 108909                                                                            | Aida                                                                   | 0 | 1,18    | 9,60E-01 |
| P59759         | 3  | 2 | 0     | 239719                                                                            | Mrtfb                                                                  | 0 | 52,33   | 1,60E-16 |
| Q9DC63         | 6  | 2 | 0     | 57443                                                                             | Fbxo3                                                                  | 0 | 1,64    | 5,92E-01 |
| SRPP_HE<br>VBR | 5  | 2 | 0     |                                                                                   | SRPP                                                                   | 0 | 0,99    | 9,96E-01 |
| P50543         | 10 | 2 | 3,59  | 20195                                                                             | S100a11                                                                | 0 | 2,18    | 8,48E-02 |
| Q80Y24         | 3  | 2 | 0     | 243548                                                                            | Prickle2                                                               | 0 | 0,99    | 9,91E-01 |
| Q99JW1         | 5  | 2 | 3,27  | 216169                                                                            | Abhd17a                                                                | 0 | 0,84    | 7,19E-01 |
| Q6P5E8         | 2  | 2 | 0     | 110524                                                                            | Dgkq                                                                   | 0 | 1000,00 | 1,60E-16 |
| Q80XU8         | 4  | 2 | 1,72  | 225875                                                                            | Lrfn4                                                                  | 0 | 0,80    | 7,93E-01 |
| O35454         | 2  | 2 | 1,67  | 26372                                                                             | Cln6                                                                   | 0 | 0,82    | 8,52E-01 |
| Q9D967         | 18 | 2 | 3,23  | 67881                                                                             | Mdp1                                                                   | 0 | 1,01    | 1,00E+00 |
| Q8K0V2         | 6  | 2 | 0     | 233805                                                                            | Dcun1d3                                                                | 0 | 0,94    | 9,74E-01 |
| P84244         | 10 | 2 | 3,39  | 15078;<br>15081                                                                   | H3-3a;<br>H3-3b                                                        | 0 | 1,16    | 9,48E-01 |
| P02301         | 10 | 2 | 3,39  |                                                                                   | H3-5                                                                   | 0 | 1,16    | 9,48E-01 |
| P68433         | 10 | 2 | 3,39  | 319152;<br>319153;<br>360198;<br>97908                                            | H3c1;<br>H3c10;<br>H3c11;<br>H3c8                                      | 0 | 1,16    | 9,48E-01 |
| P84228         | 10 | 2 | 3,39  | 15077;<br>260423;<br>319148;<br>319149;<br>319150;<br>319151;<br>319154;<br>97114 | H3c13;<br>H3c14;<br>H3c15;<br>H3c2;<br>H3c3;<br>H3c4;<br>H3c6;<br>H3c7 | 0 | 1,16    | 9,48E-01 |

|        |    |   |      |                  |          |   |         |          |
|--------|----|---|------|------------------|----------|---|---------|----------|
| Q9ER35 | 7  | 2 | 0    | 63828            | Fn3k     | 0 | 0,91    | 9,74E-01 |
| Q9CYN2 | 8  | 2 | 3,59 | 66624            | Spcs2    | 0 | 1,02    | 1,00E+00 |
| Q9JI75 | 10 | 2 | 0    | 18105            | Nqo2     | 0 | 0,80    | 5,62E-01 |
| Q9R0A0 | 5  | 2 | 5,18 | 56273            | Pex14    | 0 | 0,91    | 9,56E-01 |
| Q5IRJ6 | 3  | 2 | 0    | 109108           | Slc30a9  | 0 | 0,62    | 3,63E-01 |
| Q8K2L8 | 3  | 2 | 0    | 217449           | Trappc12 | 0 | 0,95    | 9,76E-01 |
| O88512 | 2  | 2 | 0    | 11766            | Ap1g2    | 0 | 0,82    | 8,25E-01 |
| P14115 | 13 | 2 | 0    | 26451            | Rpl27a   | 0 | 0,74    | 8,01E-01 |
| Q8CI51 | 3  | 2 | 0    | 56376            | Pdlim5   | 0 | 0,80    | 5,34E-01 |
| Q8K4R4 | 5  | 2 | 0    | 71795            | Pitpnc1  | 0 | 0,75    | 7,58E-01 |
| P14576 | 5  | 2 | 0    | 24067;<br>665155 | Srp54    | 0 | 1,21    | 9,52E-01 |
| Q80ZJ6 | 3  | 2 | 0    | 227693           | Zer1     | 0 | 1,05    | 9,94E-01 |
| Q9QXK3 | 2  | 2 | 0    | 54160            | Copg2    | 0 | 0,91    | 9,41E-01 |
| Q80YQ8 | 7  | 2 | 0    | 68477            | Rmnd5a   | 0 | 1,11    | 9,76E-01 |
| Q80X72 | 3  | 2 | 0    | 74488            | Lrrc15   | 0 | 1000,00 | 1,60E-16 |
| Q91WL8 | 4  | 2 | 0    | 80707            | Wwox     | 0 | 0,74    | 3,52E-01 |
| Q9WV85 | 13 | 2 | 0    | 79059            | Nme3     | 0 | 1,11    | 9,76E-01 |
| Q02819 | 3  | 2 | 1,65 | 18220            | Nucb1    | 0 | 0,81    | 8,95E-01 |
| Q8R4H2 | 1  | 2 | 0    |                  | Arhgef12 | 0 | 1,27    | 9,32E-01 |
| Q8C7K6 | 3  | 2 | 0    | 240334           | Pcyox11  | 0 | 0,76    | 7,46E-01 |
| Q61271 | 5  | 2 | 0    | 11479            | Acvr1b   | 0 | 0,89    | 9,64E-01 |
| Q8C547 | 1  | 2 | 1,61 | 320473           | Heatr5b  | 0 | 1000,00 | 1,60E-16 |

**Supplementary Table 4: Proteomics comparison with Sharma et al.**

| All proteome |                         |                           |
|--------------|-------------------------|---------------------------|
| Common       | Mouse Proteome Residual | DA-FASS Proteome Residual |
| Ruvbl2       | Sergef                  | H2bc3                     |
| Gstm2        | Dhx9                    | Selenoi                   |
| Psm4         | Ssu72                   | Septin8                   |
| Capzb        | Eif2b2                  | Atp5f1b                   |
| Ppia         | Dcun1d2                 | Plppr4                    |
| Syt2         | Hebp2                   | Srprb                     |
| Actn4        | Vps28                   | Eloc                      |
| Tigar        | Polr3c                  | Fcsk                      |
| Pithd1       | Selh                    | Maip1                     |
| Pmm1         | Pex19                   | Acacb                     |
| Dnajc11      | Pkia                    | Cmtm4                     |
| Rab9b        | Bcl7a                   | Ca4                       |
| Prkag2       | Bnip3l                  | Vps50                     |
| Nos1         | Shc2                    | Afdn                      |
| Sod2         | Cachd1                  | Atp5md                    |
| Camk4        | Trmt5                   | Adprs                     |
| Tnpo1        | Ptgr1                   | Acaa1b                    |
| Atp6v1e1     | B9d2                    | Mtatp6                    |
| Spata2l      | Phax                    | Nudt10                    |
| Asap1        | Spock2                  | Gstp2                     |
| Eef1g        | Atp13a1                 | Tgm3                      |
| Vamp2        | Rplp2                   | Rps2                      |
| Pfkl         | Hmgn3                   | Gsdma2                    |
| Ndufs4       | Strbp                   | Oga                       |
| Plp1         | Psmg2                   | Nipsnap2                  |
| Tst          | 11-Sep                  | Prune1                    |
| Nln          | Med4                    | Septin2                   |
| Pi4k2a       | Mief1                   | Atp5f1e                   |
| Aimp1        | Gtf2e2                  | Septin4                   |
| Gnaq         | Steap3                  | Aloxe3                    |
| Gbe1         | Tango2                  | Ap1g2                     |
| Aida         | Kcnh1                   | Kiaa0513                  |
| Ctbp2        | Slc25a15                | H2ac20                    |
| Fahd1        | Rnf115                  | Pc                        |
| Ap1s1        | Hdgf                    | Mt-Cyb                    |
| Ptprs        | Arhgap35                | Mtco2                     |
| Gpre5b       | Lzts1                   | Czib                      |
| Lta4h        | C1qtnf4                 | Bles03                    |
| C1qbp        | Fam73b                  | Selenbp2                  |
| Rasgrp2      | Pitpnm3                 | Gatd1                     |

|              |              |                                                                                   |
|--------------|--------------|-----------------------------------------------------------------------------------|
| Agpat3       | Sowahe       | Adrm1                                                                             |
| Eef1d        | Nup188       | Slc35f1                                                                           |
| Ppp2ca       | Grk5         | Eprs1                                                                             |
| Ocrl         | Def8         | Mrtfb                                                                             |
| Ckb          | Bbx          | Tmem35a                                                                           |
| Ndufb3       | Pea15;Pea15a | Ptpa                                                                              |
| Dab2ip       | Mrps9        | Hspa1b                                                                            |
| Tomm40       | Samd10       | Uba1y                                                                             |
| Ube2m        | Nmt1         | Adgrl1                                                                            |
| Arfgef3      | Arhgap29     | H4c1; H4c11; H4c12; H4c14; H4c2; H4c3; H4c4;<br>H4c6; H4c8; H4c9; H4f16; Hist1h4m |
| Bcat1        | Mp68         | Pcdhga4                                                                           |
| Tecpr1       | Slc47a1      | H2ac15                                                                            |
| Mboat7       | Nup210       | Ckmt2                                                                             |
| Ppm1h        | Sharpin      | Septin9                                                                           |
| Ran          | Nol4l        | Hsd17b8                                                                           |
| Tars2        | Sh3rf1       | Plppr1                                                                            |
| Grik3        | Mad11l       | Ret                                                                               |
| Stxbp5       | Tcaim;TCAIM  | H2az1                                                                             |
| Crtac1       | Pla2g4e      | Hnrnpk                                                                            |
| Gcdh         | Sor1l        | Atp6v0a4                                                                          |
| Calr         | Pcbd2        | Hba                                                                               |
| Ddah2        | Emsy         | Atp2a1                                                                            |
| Hbb-b1       | Rpl37        | Atp5f1c                                                                           |
| Wasf3        | Armex2       | H3-5                                                                              |
| Snap29       | Dda1         | Pof1b                                                                             |
| Csnk2b       | Mdc1         | Psm8                                                                              |
| Suclg1       | Ptprk        | Pycr3                                                                             |
| Map2         | Mzt2         | Ajm1                                                                              |
| Xkr4         | Kit          | Znr2                                                                              |
| Actc1        | Sult1a1      | Prps1                                                                             |
| Fam171a<br>2 | Apex1        | Cyria                                                                             |
| Kctd16       | Flywch1      | Adgrb1                                                                            |
| Htt          | Taf5l        | Hsd17b13                                                                          |
| Got1         | Ppp1r1c      | Septin11                                                                          |
| Grin2b       | Nop9         | Hars1                                                                             |
| Pgm2         | Rbbp6        | Ass1                                                                              |
| Stam         | Gbf1         | Gapdhs                                                                            |
| Crip2        | Cinp         | Rack1                                                                             |
| Osbp11a      | Fam117b      | Dsg1b                                                                             |
| Cacng2       | Nid2         | Pip4p2                                                                            |
| Cpt1a        | Mrpl38       | Grik5                                                                             |
| Elmo1        | Crabp2       | Aldh8a1                                                                           |

|          |          |                          |
|----------|----------|--------------------------|
| Arl6ip5  | Ehmt1    | Acta1                    |
| Gga3     | Ubr3     | H2bc4; H2bc6; H2bc8      |
| Pld3     | Dnajc7   | H3-3a; H3-3b             |
| Wdr47    | Tor3a    | H3c1; H3c10; H3c11; H3c8 |
| Ptpn23   | Ccdc134  | Rasl2-9                  |
| Atp1a2   | Nup37    | Prxl2b                   |
| Ptpn11   | Spp12b   | Gatd3a                   |
| Cacna2d3 | Mrpl48   | Atp5mf                   |
| Tomm22   | Rpl24    | MtnD5                    |
| Snap47   | Phospho1 | Tomm70                   |
| Syne1    | Mlf2     | Dars1                    |
| Cox15    | Dock6    | NARS1                    |
| Coro1b   | Khdrbs3  | H2ac12                   |
| Atp6ap1  | Ntn1     | Naxd                     |
| Uba1     | Wls      | Nectin1                  |
| Itgb2    | Larp7    | H2az2                    |
| Pde4d    | Wdr3     | Pkp1                     |
| Slc25a25 | Baz1a    | Gsdma                    |
| Copg2    | Cep76    | Fbx14                    |
| Galk1    | Tubb4b   | Eif3j2                   |
| Rabgap1  | Ddx42    | Insrr                    |
| Mthfd1   | Rasa2    | Scn2a                    |
| Nsdhl    | Eed      | Prss2                    |
| PsmD5    | Mrc2     | H2aw                     |
| Dpp3     | Med23    | Atp5f1a                  |
| Pak3     | Icmt     | Spart                    |
| Rab22a   | Tk2      | Gars1                    |
| Cpne2    | Fgg      | F8a1                     |
| Hspa12b  | Brms1l   | Tufm                     |
| Shisa4   | Sh3bp4   | Rida                     |
| Shank2   | Nmral1   | Hist1h2bp                |
| Cyfp2    | Ppp2r5b  | Tprg1l                   |
| Pgrmc2   | Mtx3     | Mindy2                   |
| Poldip2  | Rpl27    | Rab11b                   |
| Asrg1l   | Usp13    | H2aj                     |
| Slc7a10  | Tecr     | Atp5pd                   |
| Robo2    | Hist1h1a | Acot10                   |
| Cacna2d1 | Caprin1  | H2bc14                   |
| Aifm1    | Tusc3    | Hacd3                    |
| Numb     | Zcche18  | Gk2                      |
| P2ry12   | Rtf1     | Mfsd4a                   |
| Necap1   | Senp3    | Hist2h2aa1; Hist2h2aa2   |
| Lman2    | Cab39l   | Adgrl2                   |

|           |               |                               |
|-----------|---------------|-------------------------------|
| Tubb3     | Dxo           | Tuba3a; Tuba3b                |
| Dtd1      | Mrpl1         | Tmem121b                      |
| Clptm1    | Sidt1         | Palm2                         |
| Nt5c      | Cbl11         | Sdr9c7                        |
| Stx6      | Trim24        | Nccrp1                        |
| Dock10    | Mrps33        | Atp5pb                        |
| Txnl1     | Pf4           | Atp6v1e2                      |
| Arfgap1   | Pir           | Nme2                          |
| Map2k1    | Elavl3        | Gucy1a1                       |
| Kbtbd11   | Pm20d1        | RTRAF                         |
| Clen4     | Pon2          | H2bc11; H2bc13; H2bc15; H2bc7 |
| Appl2     | Ankrd49       | Wars1                         |
| Ndrg4     | Cox7b         | H2bc12                        |
| Serpinb1a | Bicd2         | Septin5                       |
| Ndrg2     | Gclm          | Pdyn                          |
| Cand1     | Rbm25         | Akr1e2                        |
| Atg5      | Mapk7         | D1Pas1                        |
| Hspa5     | Mtus2         | Rhot2                         |
| Gng3      | Dbn1d1        | Hist1h2af                     |
| Rabggtb   | Mcat          | Mtco1                         |
| Slc12a6   | Dmap1         | Stum                          |
| Mapt      | Whsc1         | Timm29                        |
| Cndp2     | Rufy1         | Marchf5                       |
| At11      | Dpy1911       | Retreg2                       |
| Cryz      | 5730455P16Rik | Bmerb1                        |
| Ppa2      | Nop56         | Serpinb6                      |
| Pigs      | Zhx1          | Itpr1                         |
| Cacng3    | Gbas          | Gpr88                         |
| Pdha1     | Tuba8         | Sars1                         |
| Bcap31    | Ptprz1        | Rab9a                         |
| Tollip    | Sptbn2        | Atp5po                        |
| Rab3b     | Brwd3         | Aars1                         |
| Lrrc4b    | Isca2         | Kiaa1549                      |
| Mpp3      | Sfxn2         | Septin3                       |
| Arl8a     | Heca          | Adgrb3                        |
| Plxna2    | Kctd15        | Serpinb5                      |
| Vps26b    | Paf1          | Lnpk                          |
| Scai      | Rfx3          | S100a14                       |
| Ppp2r1a   | Sil1          | Babam2                        |
| Pde1a     | Luzp2         | Hbb-b2                        |
| Pdcd10    | Tmco1         | Epb4111                       |
| Hsd17b1   |               |                               |
| 0         | Plekhh1       | Gstm3                         |
| Trappc4   | Fam89b        | H2bc9                         |

|          |                |           |
|----------|----------------|-----------|
| Kif21a   | Qtrt1          | Abraxas2  |
| Cdipt    | Taf6l          | Dglucy    |
| Fkbp8    | Ostc           | Pgm1      |
| Acsl3    | Fam92a1;Fam92a | Septin7   |
| Rnf214   | Nufip2         | Cars1     |
| Ak1      | Nelfa          | Rpl11     |
| Cct6b    | Serpina3n      | Adgrl3    |
| Slc32a1  | RtcA           | Plppr3    |
| Pgbd5    | Srp68          | Uchl4     |
| Mat2b    | Ttf2           | Fgf14     |
| Cct8     | Ltf            | C2cd4c    |
| Mical3   | Akr1c18        | Yars1     |
| Mrs2     | Alg1           | Ctnna2    |
| Camk2a   | Tfeb           | Dsg1a     |
| Abcb8    | Ppp4r1         | H2bc1     |
| Gdpd1    | Cdy1           | Eif3j1    |
| Glrx3    | Tut1           | H2ax      |
| Hagh     | Mfn1           | Lrrc15    |
| Mdh1     | Pvr1l          | Mmut      |
| Mapre2   | Atp7a          | Hist2h2bb |
| Cox6c    | Qrs1l          | Relch     |
| Sh3glb2  | Cd97           | Acta2     |
| Fbx116   | Tpr            | Adora2a   |
| Kif2a    | Asph           | Calm2     |
| Arrb1    | Lrrc20         | Gsdma3    |
| Ociad1   | Atat1          | Skt       |
| Ppp2r2c  | Rpusd4         | Elob      |
| Cpe      | Trafd1         | Rars1     |
| Actr1a   | Tfb1m          | Mydgf     |
| Irgm1    | Prepl          | Ubt1      |
| Rab11a   | Tmem106a       | Adss2     |
| Dap3     | Sox10          | Actg2     |
| Gpsm2    | Ggcx           | Atp5f1d   |
| Prdx3    | Cers6          | Atp5mg    |
| Lanc11   | Map3k19        | Plpp3     |
| Ap2a1    | Fmr1           | Gpr52     |
| Ppp2r5c  | Adamts4        | Mtnd4     |
| Ntng2    | Akr1b8         | Eipr1     |
| Lrrc7    | Otud6b         | Dsg1c     |
| Prkar2a  | C5             | Calm13    |
| Hnrnpa2b | Plekha2        | Naxe      |
| 1        | Plekha2        | Hal       |
| Rab33b   | Kbtbd4         | Septin6   |
| Cops3    | Rab2b          |           |

|          |              |                                                      |
|----------|--------------|------------------------------------------------------|
| Capn1    | Mrps26       | Chrb2                                                |
| Gabra2   | Yes1         | Eci3                                                 |
| Tomm40l  | Polr2c       | Tars1                                                |
| Ndufb7   | Ccdc28b      | Dennd11                                              |
| Tpm2     | Dpyd         | Cycs                                                 |
| Fth1     | Hbs11        | Gucy1b1                                              |
| Cmpk1    | Abcb6        | Grk2                                                 |
| Stxbp3   | Tbc1d4       | Atp5me                                               |
| Clic4    | Rbm15        | G6pd2                                                |
| Prep     | Atrnl1       | Cldnd1                                               |
| Rab24    | Agrr         | Plpbb                                                |
| Trpv2    | Txndc15      | Kif17                                                |
| Slc25a20 | mt-Co1;Mtcol | Ftl2                                                 |
| Dnaja2   | Pbk          | H3c13; H3c14; H3c15; H3c2; H3c3; H3c4; H3c6;<br>H3c7 |
| Dbnl     | Card9        | Cyrib                                                |
| Msn      | Spry2        | Vars1                                                |
| Dnajb4   | Rexo2        | Rpl15                                                |
| Picalm   | Dhcr7        | Phf24                                                |
| Irgq     | Eif3g        | Prxl2a                                               |
| Fam177a  | Lig1         | Mtstp8                                               |
| 1        | Pqbp1        | H2ac7                                                |
| Vdac1    | Kcna4        | Mtarc2                                               |
| Psmc5    | Msh6         | Rab1A                                                |
| Exoc5    | Nkrf         | Get3                                                 |
| Hspd1    | Kdm5d        |                                                      |
| Soga3    | Acn9         |                                                      |
| Isyna1   | Cux1         |                                                      |
| Tnr      | Magee1       |                                                      |
| Stim1    | Smyd3        |                                                      |
| Mlc1     | Ssfa2        |                                                      |
| Babam1   | Heatr3       |                                                      |
| Kif1b    | Gtpbp1       |                                                      |
| Mtmr2    | Kiaa0100     |                                                      |
| Tiam2    | Sp4          |                                                      |
| Rap2a    | Vps39        |                                                      |
| Lin7a    | Nol10        |                                                      |
| Brinp1   | Stk38l       |                                                      |
| Mrpl12   | Fbxo4        |                                                      |
| Crat     | Rab12        |                                                      |
| Nefm     | Rad54l2      |                                                      |
| Clip2    | Fbxo45       |                                                      |
| Fsd1     | Tsen34       |                                                      |
| Ptpn9    |              |                                                      |



|         |            |
|---------|------------|
| Sar1a   | Gjb2       |
| Cadps2  | Fam3c      |
| Kif5a   | Ostm1      |
| Dctn5   | Zyg11b     |
| Tubg1   | Smu1       |
| Gsto1   | Cpn2       |
| Sec61a1 | Man1a2     |
| Erp44   | Samhd1     |
| Ptk2    | Nubp1      |
| Cops7a  | Ctdspl2    |
| Pgam2   | Tbc1d22a   |
| Slc6a1  | Sel1l      |
| Kcnt1   | Nkiras2    |
| Gnb1    | Apoa1bp    |
| Ndufs6  | Bax        |
| Impact  | Lrrc10b    |
| Copb2   | Chd2       |
| Psat1   | Ints1      |
| Hdhd3   | Itih3      |
| Lmtk2   | Galnt7     |
| Grm3    | Morc2a     |
| Cit     | Shpk       |
| Anxa3   | Amdhd2     |
| Ctnnb1  | Bclaf1     |
| Acvr1b  | Scyl1      |
| Csnk1e  | D8ErtD738e |
| Trap1   | Rims3      |
| Pcbp1   | Lama1      |
| Cldn11  | Ik         |
| Plxnb2  | Wdhd1      |
| Hint2   | Wdr83      |
| Hint3   | Neu2       |
| Igfbp1  | Nxt2       |
| Micul   | 02-Sep     |
| Strap   | Chmp2a     |
| Arfgef1 | Htatip2    |
| Psm2    | Zfand1     |
| Ngef    | Lilrb4     |
| Sh3kbp1 | H2afy      |
| Lgalsl  | Gira2      |
| Ggct    | Arhgef2    |
| Ndrp1   | Arhgef1    |
| Fbxo2   | Rel1       |

|          |               |
|----------|---------------|
| Inpp4a   | Sltn          |
| Atp6v0a1 | Znf365        |
| Lrp1     | Prkcdbp       |
| Synpo    | Map4k2        |
| Ina      | Mpc1          |
| Stx16    | Pbdc1         |
| Baiap2   | Urb1          |
| Rnh1     | Meis2         |
| Mrps31   | Nudt11;Nudt10 |
| Srcin1   | Anks1a;Anks1  |
| Ap2m1    | Zbtb40        |
| Snx2     | Tpcn1         |
| Add3     | Gtf3c1        |
| Cfl1     | Thoc7         |
| Asphd2   | Frmpd4        |
| Ppib     | Npas3         |
| Pitpnm1  | Fpgt          |
| Pik3c3   | Ept1          |
| Adcy9    | Pde8a         |
| Rcn2     | Wdr92         |
| Prdx2    | Smarcd3       |
| Slc7a2   | Arhgdib       |
| Ncs1     | Diap1;Diaph1  |
| Tenm4    | Leo1          |
| Map1b    | Ints8         |
| Prmt1    | Ighv1-31      |
| Por      | Apbb1ip       |
| Kcna2    | Hnrnpf        |
| Aspa     | Alkbh6        |
| Sep2     | Wdr36         |
| Mapk3    | Morf4l1       |
| Vgf      | Tnfaip8       |
| Hsp90b1  | Slc38a10      |
| Cbr4     | Clec12a       |
| Srgap3   | Luc7l3        |
| Igsf8    | Slc22a6       |
| Arf4     | Cog8          |
| Rplp0    | Bhlhe22       |
| Ivd      | Uprt          |
| Rabgef1  | Epha5         |
| Gstk1    | Prkcz         |
| Tsfm     | Panx2         |
| Agap3    | Fads2         |

|          |                 |
|----------|-----------------|
| Dhrs4    | Lima1           |
| Vim      | Hira            |
| Tamm41   | Plekhh2         |
| Lzts3    | Piezo1          |
| Slc38a3  | Psm10           |
| Flot2    | Frmd8           |
| Hyou1    | Pus71           |
| Psm5     | Eps8            |
| Rps6ka2  | Pph1            |
| Slc25a13 | Rps27a          |
| Gch1     | Dph5            |
| Neto2    | Mrpl33          |
| Ryr3     | Hnrnpdl         |
| Arhgef7  | Esyt1           |
| Fam126b  | Prdm16          |
| Aco2     | Zfp280d;Znf280d |
| Asic1    | Mapkbp1         |
| Nrbp2    | Ncbp1           |
| Abhd12   | Stard5          |
| Pam      | Pyhin1          |
| Rab7a    | Wwc1            |
| Phyhipl  | Tyw3            |
| Heatr5b  | Lamtor3         |
| Ache     | Bst2            |
| Entpd2   | Man1c1          |
| Agpat5   | Dip2c           |
| Cpne9    | Hps3            |
| Fxyd6    | Snd1            |
| Ptprn2   | Men1            |
| Alcam    | Nacc2           |
| Lamp2    | Ankrd27         |
| Sorbs2   | Mta2            |
| Ube2v2   | Pts             |
| Gmpr     | Cdc123          |
| Arhgap32 | Fmo1            |
| Csnk2a1  | Frg1            |
| Ube2o    | Znf316;Zfp316   |
| Stx1b    | Rangap1         |
| Stip1    | Shisa6          |
| Elmo2    | Tardbp          |
| Celsr2   | Mybbp1a         |
| Gabbr2   | Riok2           |
| Ppm1f    | Map7d1          |

|         |               |
|---------|---------------|
| Prkcsb  | Ears2         |
| Hexb    | Pena          |
| Napa    | Arhgap6       |
| Atp2b4  | Fadd          |
| Rufy3   | Dhtkd1        |
| Avl9    | Ammecr11      |
| Cltb    | Nfyb          |
| Elmod2  | Gm20547;Cfb   |
| Ppp2r5e | Lias          |
| Tmem163 | Ipo13         |
| Oxsr1   | Lepre1        |
| Arpc5   | Aktip         |
| Endod1  | Postn         |
| Rdh14   | Nploc4        |
| Gaa     | Cd2ap         |
| Gsn     | Tomm7         |
| Tdrkh   | Eri3          |
| Ehd1    | Smg5          |
| Mapk10  | H6pd          |
| Cpt1c   | Alg10b        |
| Kcnab2  | Znf428;Zfp428 |
| Slc44a2 | Cox7a2        |
| Exoc7   | Sec61g        |
| P4hb    | Brd8          |
| Plcl2   | Ensa          |
| Ablim2  | Pomgnt2       |
| Itsn1   | Jmy           |
| Psmc3   | Golm1         |
| Actr3   | Hic2          |
| Lasp1   | Smarca2       |
| Vti1b   | Wdr34         |
| Stx1a   | Crot          |
| Pesk2   | Ppm1k         |
| Bckdk   | Acads         |
| Mtch2   | Prpf39        |
| Erc1    | Mien1         |
| Ipo7    | Myo7a         |
| Rab1b   | Rwdd1         |
| Apoe    | Tom111        |
| Cntfr   | Rexo1         |
| Agfg1   | Nol4          |
| Ddhd2   | Zmym2         |
| Fmnl2   | Mcee          |

|           |                     |
|-----------|---------------------|
| Plcxd3    | Ppp1r3g             |
| Ckap5     | Tmed7               |
| Gltf      | Kcnq2               |
| Rab35     | Lgi2                |
| Hgs       | Smad5               |
| Slc25a44  | Cplx3               |
| Apmap     | 1810009A15Rik       |
| Creld1    | Nek7                |
| Pafah1b2  | 1700112E06Rik       |
| Cask      | Sqle                |
| Daam2     | Isoc2b              |
| Syn3      | Aplp1               |
| Gabrd     | Tmem167a;Tmem167    |
| Gnpda1    | Sumf1               |
| Acox1     | Sclt1               |
| Grik2     | Nt5dc2              |
| Cacna1e   | Sh3pxd2a            |
| Ppp2r2a   | B630019K06Rik       |
| Srr       | Sumf2               |
| Rps3      | Pde7b               |
| Reps2     | Igsf11              |
| Eif3i     | Pcdh9               |
| Atp6v1c1  | Cdk19               |
| Tspan7    | Recql               |
| Tmx2      | Amz2                |
| Rab11fip2 | Idh3b               |
| Hsph1     | Helb                |
| Tagln3    | Hist3h2ba;Hist3h2bb |
| Anxa1     | Phlda3              |
| Atg9a     | Ring1               |
| Clpp      | Neur14              |
| Fn3k      | Khsrp               |
| Guk1      | Enpep               |
| Comtd1    | Pa2g4               |
| Rras2     | Ttc19               |
| Tmod2     | Grtp1               |
| Pcca      | Plekha5             |
| Susd2     | Acbd5               |
| Cacnb1    | Tor1aip1            |
| Dgkz      | Rabif               |
| Tmed9     | Lyz1                |
| Sncb      | Cnot11              |
| Ddah1     | Fgfr1               |

|         |               |
|---------|---------------|
| Pacsin1 | Wdyhv1        |
| Ergic1  | Khbyn         |
| Dgkq    | Plod1         |
| Ctnnd1  | Pcif1         |
| Rpl27a  | Pcdh17        |
| Ptp4a1  | Minos1        |
| Mal2    | Trpm3         |
| Ampd2   | Lrrc75a       |
| Gsk3b   | Mxra8         |
| Igsf21  | Znrf2         |
| Hibch   | Tmem151a      |
| Cdip1   | Shf           |
| Vbp1    | Taok2         |
| Plxna4  | Dennd6a       |
| Spryd7  | Hax1          |
| Atg3    | Matr3         |
| Rab4b   | Tmem38a       |
| Hcn1    | Cacna1c       |
| Arhgap1 | Hist2h2ab     |
| Dctn4   | Ccdc91        |
| Plgrkt  | Dcaf11        |
| Acs11   | Rab11b;Rab11a |
| Slc8a1  | Pola1         |
| Aldh4a1 | Gnl2          |
| Sars2   | Aga           |
| Ppp3cb  | Eif3b         |
| Syngn3  | Thap11        |
| Syt1    | Igha          |
| Tsc1    | Acox3         |
| Agap2   | Crnk11        |
| Ppp1cc  | Igfbp5        |
| Slc4a4  | Ptdss2        |
| Ubfd1   | Fam50a        |
| Huwe1   | Rbp1          |
| Akr1a1  | Zc3h6         |
| Ccdc6   | Gorab         |
| Prkacb  | Tmtc3         |
| Ndufs3  | Cdv3          |
| Gpd11   | Rwdd2a        |
| Ap2b1   | Gstt1         |
| Dmxl2   | Limk1         |
| Eif4h   | Ugt1a6        |
| Eif4a2  | Tstd3         |

|              |             |
|--------------|-------------|
| Oscpl        | Lrrc73      |
| Faah         | Arap2       |
| Rhog         | Ctage5      |
| Prkca        | Helz2       |
| Mgll         | Serpib9     |
| Efr3a        | Vtn         |
| Pdcd6        | Eif2s2      |
| Kif5c        | Pbxip1      |
| Pdp1         | Desi2       |
| Eppk1        | Nudcd2      |
| Rab14        | Adap1       |
| Bckdha       | Pias4       |
| Rgs8         | Fam32a      |
| Idh1         | Txn         |
| Ly6h         | Zfp943      |
| Me2          | Rcc1        |
| Gart         | Lcorl       |
| Ncam2        | Adar        |
| Itm2c        | Nosip       |
| Hsd17b1<br>1 | Dlg5        |
| Cntnap1      | Sh3pxd2b    |
| Gmcs         | Xrcc4       |
| Acot2        | Serhl       |
| Ddc          | Muc5b       |
| Vipas39      | Plin4       |
| Ermn         | Stk25       |
| Fry          | Pex3        |
| Ank3         | Fam49a      |
| Armc6        | Hck         |
| Atcay        | Ppp2r3a     |
| Ap3m1        | Ppp1r1a     |
| Aldh9a1      | P4ha2       |
| Ctnn         | Ifi35       |
| Stxbp1       | Snrpa1      |
| Zc2hc1a      | Adcy3       |
| Wdr44        | Rai14       |
| Ndufv2       | Tomm34      |
| Rasal1       | Ppfia4      |
| Ndufaf5      | Ccar1       |
| Cntn2        | Abrac1      |
| Tpp2         | Ggact       |
| Pkp4         | H3f3a;H3f3c |
| Gstp1        | Parl        |

|          |          |
|----------|----------|
| Pefl     | Rabep2   |
| Cyb5a    | Ociad2   |
| Lrrc8a   | Ndufaf7  |
| Ppme1    | Pask     |
| Shisa9   | Rad21    |
| Slc25a22 | Pvr      |
| Dnajb6   | Prex1    |
| Lrrtm3   | Tgfb1i1  |
| Gnai2    | Prmt7    |
| Wwox     | Rnf34    |
| Vcl      | Lipe     |
| Pdxp     | Bai3     |
| Ywhaq    | AW551984 |
| Coq9     | Cbln1    |
| Ncald    | Igf2     |
| Aldh2    | Disp2    |
| Ywhah    | Lsm6     |
| Camsap3  | Evi2b    |
| Psmc1    | Cnot1    |
| Actr3b   | Hnrnpa0  |
| Ahcyl2   | Anapc5   |
| Ap1b1    | Sybu     |
| Clvs2    | Cyb5r4   |
| Arpc1a   | Gatc     |
| Ppm1e    | Efna3    |
| Snap91   | Rraga    |
| Rap1a    | Gtf2a2   |
| Astn1    | Eif1b    |
| Ppp5c    | Fam193a  |
| Psph     | Stx18    |
| Slc38a1  | Znf687   |
| Arih1    | Itgal    |
| Slc17a6  | Crocc    |
| Gad1     | Mef2c    |
| Omg      | Ghdc     |
| Gss      | Sipa1l2  |
| Pank4    | Nhs12    |
| Tmem33   | Prelp    |
| Arf2     | Myo1c    |
| Nrcam    | Ccdc109b |
| Vps53    | Coq7     |
| Txndc5   | Ilf2     |
| Ttc39c   | Zfp318   |



|          |                |
|----------|----------------|
| Camk1d   | Ppif           |
| Psmf1    | Fam206a        |
| Cdk5     | Zdhhc21        |
| Letmd1   | Mcm7           |
| Dlgap3   | Ufl1           |
| Strn4    | Nup54          |
| Arpc5l   | Kdm1a          |
| Grid1    | Sestd1         |
| Hepacam  | Hist1h3b       |
| Napb     | Oxa1l          |
| Ldhb     | Rpl11;Gm10036  |
| Cystm1   | Thoc1          |
| Sv2c     | Nup107         |
| Pdia3    | Glt8d1         |
| Syn1     | Stat5b         |
| Cadm4    | Hmgn2          |
| Sord     | Ston2          |
| Rab3gap1 | Atg10          |
| Zdhhc5   | Stag1          |
| Psm2     | Tex264         |
| Gmfb     | Trub1          |
| Iqsec1   | Kars           |
| Ipo5     | Nudt2          |
| Usp46    | Mrpl53         |
| Lrba     | Igsf5;Pcp4     |
| Pi4ka    | Rps16          |
| Snx7     | Sema3a         |
| Emd      | Taf5           |
| Cpne7    | Tanc1          |
| Pebp1    | Atp5c1         |
| Uba5     | Fam69a         |
| Tbc1d17  | Pknx1          |
| Arl6ip1  | Mtntp8;mt-Atp8 |
| Apeh     | Ubac1          |
| Ndel1    | Gusb           |
| Scamp1   | Lman2l         |
| Mdga2    | Zc3h1.1a       |
| Asl      | Ralbp1         |
| Grm7     | Slc14a1        |
| Rundc3a  | Trmt10c        |
| Aldh18a1 | Mrpl54         |
| Slc3a2   | Iws1           |
| Ppm1a    | Zfp91          |

|          |                                |
|----------|--------------------------------|
| Mark2    | Kif13a                         |
| Mlycd    | Cbs                            |
| Efnb3    | Reep1                          |
| Abhd3    | Ppp1r13b                       |
| Prickle2 | Ncapg                          |
| Zer1     | Klkb1                          |
| Idh2     | Tax1bp1                        |
| Katnal1  | Clasrp                         |
| Purb     | Mug1                           |
| Vps13c   | Sec11a                         |
| Rpn1     | Nipal4                         |
| Tbcel    | Ecd                            |
| Dpp10    | Tulp4                          |
| Cd38     | Atox1                          |
| Dhodh    | Phactr3                        |
| Cacnb3   | Slc25a27                       |
| Acadsb   | Pde5a                          |
| Ppp1cb   | Tdg                            |
| Lpcat4   | Exosc6                         |
| Slc7a5   | Ctps2                          |
| Nrxn2    | Fen1                           |
| Aprt     | Uba6                           |
| Cyc1     | Trrap                          |
| Adrbk2   | Fundc1                         |
| Prkab2   | Klhl11                         |
| Snta1    | Mmp12                          |
| Acad9    | Far1                           |
| Crmp1    | Nfkb2                          |
| Mtap     | Son                            |
| Gna11    | Ift81                          |
| Ndufb11  | Entpd7                         |
| Sgta     | Irg1                           |
| Uggt1    | Cdh1                           |
| Atp6v1g2 | Rps26                          |
| Ubr4     | Chadl                          |
| Lingo2   | Camkmt                         |
| Dgkb     | Kctd3                          |
| Gstm7    | Ptpn1                          |
| Abhd6    | Asb6                           |
| Smad1    | Dolk                           |
| Anxa2    | Syndig1                        |
| Map6     | Nbn                            |
| Cc2d1a   | Hist2h2ac;Hist2h2aa1;Hist1h2al |

|          |               |
|----------|---------------|
| Dhrs7    | Ptpn18        |
| Rars2    | Spryd4        |
| Vac14    | Sfmbt1        |
| Vamp1    | Slc35f3       |
| Prrt3    | Fam160a2      |
| Rtn3     | Ncoa2         |
| Pgam5    | Tbce          |
| Abi1     | Fhod3         |
| Tenm2    | Txn2          |
| Pdlim5   | Rrp12         |
| Ndufa2   | Fam98a        |
| Nedd41   | Triap1        |
| Mri1     | Iscu          |
| Snx30    | Qil1          |
| Ankrd34b | Cpsf6         |
| Cdh10    | Ubxn7         |
| Csde1    | Ca11          |
| Acsf3    | Tfip11        |
| Pak1     | Ccdc47        |
| Naca     | Snrpd2;Gm5449 |
| Kcnj10   | Rftn1         |
| Ubqln2   | Slitrk4       |
| Tsg101   | Prdm8         |
| Fyn      | Mki67         |
| Kirrel3  | Eml6          |
| Cops5    | Arhgap20      |
| Cadps    | Tuba3a        |
| Apoo     | Cd59a         |
| Ncstn    | Dcp1a         |
| Pccb     | Lancl3        |
| Fabp5    | Gstt2         |
| Pmpca    | Gjc2          |
| Asah1    | Nudt18        |
| Kcnma1   | Gdf10         |
| Gnb5     | Psme3         |
| Snx4     | Cthrc1        |
| Pcyt2    | Elac1         |
| Slc2a13  | Ethe1         |
| Ampd3    | Sbds          |
| Unc13b   | Txlna         |
| Actbl2   | Trove2        |
| Nck1     | Tmem245       |
| Lcp1     | Pat11         |

|          |               |
|----------|---------------|
| Tubg2    | Prpf4b        |
| Slc6a9   | Sugct         |
| Arpc3    | N6amt1        |
| Cntn4    | Armex4        |
| Kctd12   | Kdm2a         |
| Surf1    | Svil          |
| Micu3    | Epg5          |
| Wdr7     | Cyp27a1       |
| Rtcb     | Cd84          |
| Hace1    | Abcg1         |
| Arg1     | Traf6         |
| Dnajb1   | Dao           |
| Tuba1a   | Tacc1         |
| Psmc3    | Cnnm2         |
| Ogt      | Thoc3         |
| Pdk3     | Sec14l3       |
| Cct3     | Myh1          |
| Palm     | Ep400         |
| Isoc1    | BC037034      |
| Bcap29   | Btbd11        |
| Rmnd1    | Prkaa1        |
| Nptx1    | Fbxo22        |
| Rab18    | Urgcp         |
| Txnrd1   | Mcam          |
| Dclk1    | Pycr1         |
| Arfip2   | Polr2a        |
| Tcp1     | Cyp7b1        |
| Gnal     | Rprd1b        |
| Vcpip1   | Gsta3         |
| Emc1     | Tmco3         |
| Arhgap23 | I830012O16Rik |
| Ptpn5    | Cmb1          |
| Adam22   | Rassf2        |
| Tipr1    | Ikbke         |
| Mrps23   | Cyth1         |
| Diras1   | Lsm14b        |
| Ndufa6   | Crbn          |
| Acot9    | Zc3h14        |
| Bcl2l13  | Chmp6         |
| Gpr158   | Brinp3        |
| Abhd17a  | Rab11fip1     |
| Ndufc2   | Tesk1         |
| Neb1     | Obp1a         |

|          |                 |
|----------|-----------------|
| Slc25a42 | Bet1            |
| Shank3   | Kdsr            |
| Nefh     | Wdr4            |
| Cdc37    | Usp11           |
| Svop     | Nutf2           |
| Gapdh    | Myl12a          |
| Aldh1a7  | Hdac9           |
| Ech1     | Cntnap5a        |
| Cplx2    | Taf7            |
| Gfra2    | Gucy1a2         |
| Cyld     | Actl6b          |
| Lrp1b    | Caap1           |
| Cox5a    | Pfdn2           |
| Armc8    | Dnttip2         |
| Sucla2   | Jund            |
| Cyp46a1  | Ulk1            |
| Atp2b2   | Ophn1           |
| Shisa7   | Filip11         |
| Commd3   | Syne3           |
| Gsta4    | S100a13         |
| Myo6     | Afm             |
| Arl15    | AI837181;Bles03 |
| Afg3l2   | Eif4e2          |
| Hecw2    | Nkiras1         |
| Gnas     | Acad12          |
| Jup      | Taf10           |
| Gja1     | Ufd11           |
| Erlin2   | Prkab1          |
| Lysmd2   | Spg21           |
| Tmem25   |                 |
| 6        | E2f3            |
| Fermt2   | Nmnat3          |
| Smyd5    | Ints6           |
| Eef1a2   | Sdc4            |
| Mfsd6    | Col4a2          |
| Slc6a6   | Polr1d          |
| Ndufaf3  | Pes1            |
| Rgs6     | Wbscr27         |
| Zzef1    | Dclk2           |
| Gria2    | Rpl7            |
| Chordc1  | Rbm45           |
| Hpcal1   | Skiv2l          |
| C2cd5    | Sgcd            |
| Hnrnph2  | Fbxw11          |

|          |               |
|----------|---------------|
| Iglon5   | Zbtb20        |
| Lrrtm1   | Dnal4         |
| Ntrk3    | Map9          |
| Slc2a3   | Commd2        |
| Cops8    | Atxn10        |
| Gmppa    | Ccdc120       |
| Elfn2    | Ctsh          |
| Atg2b    | Stk10         |
| Abr      | D3Ert751e     |
| Slc6a17  | Cdadc1        |
| Cnnm1    | Ankrd29       |
| Pitrm1   | Psd           |
| Adam11   | Wbscr17       |
| Gabrg2   | Apoc1         |
| Dpysl4   | Nat10         |
| Gpd2     | Map3k5        |
| Dctn1    | Pltp          |
| Gmps     | Tbc1d12       |
| Ctnnd2   | Sap30l        |
| Sorcs3   | Slit2         |
| Ddx1     | Obsl1         |
| Fgf12    | Slc16a3       |
| Fibp     | Cwc27         |
| Stmn2    | Tubb1         |
| Ak5      | Celf5         |
| Glod4    | Tfe3          |
| Uqcrq    | Gle1          |
| Vps25    | Dvl1          |
| Ezr      | Mcl1          |
| Dync1li1 | Uevld         |
| Nap11l   | Sirt1         |
| Rps13    | Nt5m          |
| Tm9sf3   | Dnajc13       |
| Tesc     | Fam163b       |
| Grpel1   | Grwd1         |
| Eea1     | Chka          |
| Camkk2   | Rsph1         |
| Gdi2     | Eif4a3;Gm8994 |
| Cul2     | Hmgn5         |
| Ndufs1   | Clasp1        |
| Pde2a    | Prkrip1       |
| Gpm6b    | Mrp142        |
| Epb41    | Gm16039       |

|          |                        |
|----------|------------------------|
| Mtmr1    | Kiaa0513;6430548M08Rik |
| Nlgn2    | Csrp3                  |
| Coq3     | Apc2                   |
| Agk      | Mndal                  |
| Pip4k2c  | Syvn1                  |
| Exoc8    | Nnt                    |
| Thns11   | Plin2                  |
| Vsn11    | Emc9                   |
| Git1     | Phf5a                  |
| Acsl6    | Ddx5                   |
| Opa1     | Rgp1                   |
| Dbn1     | Fam13c                 |
| Vps33b   | Usp29                  |
| Hsp90aa1 | Suds3                  |
| Arpc2    | Myl4                   |
| Pnp      | Akap10                 |
| Sh3gl1   | Rpl39                  |
| Olfm2    | Nabp2                  |
| Dlg1     | Zfyve9                 |
| Them4    | Frmd4a                 |
| Tmem30a  | Xpo6                   |
| Sema7a   | Fbl11                  |
| Brsk1    | Flnb                   |
| Pthr2    | Mrps7                  |
| Fkbp1a   | Hpgds                  |
| Tppp3    | Limch1                 |
| Mlec     | Tmem177                |
| Slc12a9  | Upf3b                  |
| Thop1    | Bach1                  |
| Slc12a2  | Kin                    |
| Aldh111  | Ict1                   |
| Jam3     | Gpc5                   |
| Kalrn    | Fstl5                  |
| Vkorc111 | Ctdsp1                 |
| Ddx19a   | Zfp384                 |
| Sugt1    | Arhgap27               |
| Vps26a   | Fgf1                   |
| Hspa12a  | Ebp                    |
| Dlat     | BC100530               |
| Cd200    | Pam16                  |
| Gba2     | Lonp2                  |
| Arcn1    | Spata13                |
| Aldh7a1  | U2surp                 |

|              |                        |
|--------------|------------------------|
| Atp2a3       | Serpinb6;Serpinb6a     |
| Slk          | Vav2                   |
| Mtx1         | S100a9                 |
| Cyb5r1       | Grk6                   |
| Iqcb1        | Nup35                  |
| Gabbr2       | Pdia5                  |
| Ist1         | Timp3                  |
| Xpo1         | F13a1                  |
| Coro1a       | Foxk1                  |
| Sco1         | Bpifa2                 |
| Epm2aip<br>1 | Rpl8                   |
| Pdpr         | Rab3il1                |
| Nme1         | Lsm2                   |
| Abcg2        | Serpinf2               |
| Slc25a11     | Sap130                 |
| Lmbrd2       | Sowaha                 |
| Uqcc1        | Lmnb1                  |
| Caskin1      | Sts                    |
| Wdr54        | 2310035C23Rik;Kiaa1468 |
| Mtfr11       | Stx5;Stx5a             |
| Tmem65       | H2afy2                 |
| C2cd2l       | Lig3                   |
| Sipa111      | Krit1                  |
| Mccc1        | Peli1                  |
| Blvra        | Arfip1                 |
| Erp29        | Wdsub1                 |
| Ube2k        | Smarcc2                |
| Hsd1l        | P2rx7                  |
| Rnpep        | Ylpm1                  |
| Epn1         | Nfat5                  |
| Rap1gap      | Med17                  |
| Sdhd         | Ostf1                  |
| Aqp4         | Ebna1bp2               |
| Cnr1         | Rps4l                  |
| Lamtor1      | AI848285               |
| Bsn          | Bcam                   |
| Lrtm2        | Gtf3c3                 |
| Pde1b        | Inip                   |
| Tbcb         | Znf512                 |
| Dnajc5       | Ktn1                   |
| Hk2          | Ntper                  |
| Rab6a        | Kiaa1109               |
| Diras2       | Pros1                  |



|          |           |
|----------|-----------|
| Pik3r4   | Ptbp2     |
| Ncdn     | Slc6a8    |
| Pck2     | Nell1     |
| Psmb1    | Smchd1    |
| Synpr    | Dpp9      |
| Rhot1    | Mthfd21   |
| Atg16l1  | Birc2     |
| Twf2     | Armc9     |
| Ftl1     | Scd2;Scd3 |
| Hpcal4   | Shoc2     |
| Eif4b    | Stk16     |
| Maoa     | Atp9b     |
| Map1lc3a | Arhgef11  |
| Vps51    | Tbc1d1    |
| Sv2a     | Kdelc1    |
| Ado      | Slc15a3   |
| Glud1    | Ssb       |
| Psmc7    | Atxn3     |
| Ephx2    | H2-D1     |
| S1pr1    | Fars2     |
| Cad      | Gtpbp3    |
| Actb     | Pcnt      |
| Eno1     | Meaf6     |
| Actr2    | Ccrn4l    |
| Prrt1    | Neu1      |
| Ap3b1    | Arhgef4   |
| Pip5k1b  | Urb2      |
| Slc4a8   | Ubl7      |
| Mpi      | Sphk1     |
| Adam10   | Mettl1    |
| Wdr1     | Cplx1     |
| Spq7     | Mfge8     |
| Nptxr    | Tssc1     |
| Ndufa13  | Gfod2     |
| Bdh1     | Bbox1     |
| Tpd52l1  | Sh3bgrl3  |
| Ndufa4   | Epha3     |
| Eef1b    | Grid2ip   |
| Ap1g1    | Nono      |
| Mem1     | Zfyve28   |
| Cacna1a  | Serpinb10 |
| Snx1     | Mturn     |
| Ap1m1    | Ahsg      |

|         |               |
|---------|---------------|
| Usp15   | Gid8          |
| Eml5    | Zfand6        |
| Rapgef2 | Aebp1         |
| Klc1    | Stard3        |
| Mpst    | Stt3b         |
| Spes2   | Ttc4          |
| Pfn1    | Lppr2         |
| Ube3a   | Agfg2         |
| App     | R3hdm2        |
| Ndufa11 | Notch2        |
| Atp6v1a | Tmem214       |
| Plxnd1  | Cln2          |
| Cct5    | Hmgb1         |
| Exoc3   | Avp           |
| Ndufb5  | Ankrd44       |
| Fah     | Zfyve21       |
| Basp1   | Smardc1       |
| Hip1r   | 2810408M09Rik |
| Cap2    | Oas3          |
| Dad1    | Mt2           |
| Fundc2  | Ctnnb1        |
| Fkbp4   | Zfp62         |
| Gng7    | Hps5          |
| Xpnpep1 | Synj2         |
| Mras    | Dnajc24       |
| Wdr13   | Enpp4         |
| Necab1  | Gnptab        |
| Sirt5   | Hif1an        |
| M6pr    | Fcgr2         |
| Tsc2    | Sumo2         |
| Ugp2    | Prim1         |
| Hspa8   | Ctnna1        |
| Tmem11  | Igf2bp3       |
| Agpat1  | Cox20         |
| Pcyox11 | Rpl10         |
| Kifap3  | H1f0          |
| Tnpo3   | Alkbh8        |
| Kif1a   | Ddx20         |
| Abl2    | Lrrc4         |
| Epb4112 | Zc3hav11      |
| Eif5a2  | Elav14        |
| Nap114  | Fbn2          |
| Kcna6   | Tyw5          |

|          |               |
|----------|---------------|
| Itpa     | Dkc1          |
| Nme3     | Pla2g15       |
| Acsbg1   | Hgsnat        |
| Ciapi1   | Znf207;Zfp207 |
| Psmab    | Gtf2f2        |
| Tppp     | Hist1h1d      |
| Tfam     | Ankrd13a      |
| Cxadr    | Btbd1         |
| Acp1     | Zfp292        |
| Pgap1    | Raph1         |
| Ppp6r2   | Unc80         |
| Dbt      | Mapkapk2      |
| Armc10   | U2af1         |
| Ptpre    | Mrpl23        |
| Arhgap44 | Golga4        |
| Cdk17    | Yipf3         |
| Ical     | Mthfr         |
| Atpaf1   | Dnm2          |
| Upf1     | Map2k7        |
| Lrrc4c   | Gabarapl1     |
| Gng2     | Serac1        |
| Hadhb    | Cd99          |
| Man2c1   | Tmem68        |
| Etfdh    | Mettl10       |
| Ap3s2    | Ube2f         |
| Capza1   | Cers2         |
| Rragd    | Ufsp2         |
| Rnf14    | Impdh1        |
| Atp1b2   | Rbm15b        |
| Hmgcl    | Rcsd1         |
| S100a11  | Psap          |
| Anxa6    | Frs3          |
| Scrn1    | Thra          |
| Ric8a    | Sfxn4         |
| Pclo     | Tra2b         |
| Pip4k2a  | Fut8          |
| Nudt16   | Aox1          |
| Sparcl1  | Cryba4        |
| Rab5b    | Grasp         |
| Rock1    | Samd4b        |
| Slc25a24 | Cog3          |
| Abcd3    | Ptpmt1        |
| Lrrtm4   | Dnajc9        |

|          |                  |
|----------|------------------|
| Ndufaf1  | Tmsb151;Tmsb15b2 |
| Acadl    | Pram1            |
| Itfg1    | Rpl22            |
| Kctd8    | Rpl36a           |
| Rhoc     | Sntb1            |
| Prpsap1  | Copz1            |
| Ccdc127  | Spcs3            |
| Myo5b    | Irf8             |
| Hspa4l   | Kcmf1            |
| Syngap1  | Sec62            |
| Gria4    | Pias2            |
| Vwa5a    | Cox17            |
| Gpi      | Ibtk             |
| Dstn     | Chchd4           |
| Sdr39u1  | Cdc26            |
| Ppp1r21  | Abcc1            |
| Ssr4     | Slc22a4          |
| Cdc42ep4 | Lypd1            |
| Dip2a    | Kifc2            |
| Emc3     | Mavs             |
| Grhpr    | Ccs              |
| Extl2    | Mina             |
| Gclc     | Atp5l            |
| Dmtn     | Tax1bp3          |
| Auh      | Dgkh             |
| Trio     | Aip              |
| Cntnap4  | Arnt2            |
| Pnpla8   | Fndc3a           |
| Ap3d1    | Ikkbg            |
| Dock4    | Telo2            |
| Mog      | Fam107a          |
| Lypla2   | Alpk1            |
| Rdh11    | Nt5c3b           |
| Th       | Stap1            |
| Mrpl39   | Xylt1            |
| Nomo1    | Ccdc93           |
| Ndufs8   | Vangl1           |
| Snx16    | Fkbp3            |
| Dnajb11  | Rpl18            |
| Lin7b    | Rfc5             |
| Vcam1    | Nrgn             |
| Prdx5    | Cnn2             |
| Trim9    | Lphn1            |

|         |             |
|---------|-------------|
| Adcy5   | Map4k4      |
| Itm2b   | Zkscan1     |
| Gad2    | Eln         |
| Pgd     | Rab29       |
| Ndufa8  | Prpf8       |
| Dync1i1 | Rnf2        |
| Flad1   | Ptn         |
| Akr1b1  | Acbd3       |
| Acaa2   | Lrfn3       |
| Itr3    | Crtap       |
| Enpp6   | Scn8a       |
| Nae1    | Mboat2      |
| Ddb1    | Gcn111      |
| Pgk1    | Rit2        |
| Oxr1    | Cln5        |
| Hspbp1  | 09-Sep      |
| Trim2   | Epb4.111    |
| Gpx1    | Specc1      |
| Mblac2  | Tsc22d1     |
| Etfb    | Tspan6      |
| Clu     | Mprip       |
| Ufc1    | Fam213a     |
| Lhfp14  | Mef2a       |
| Canx    | Pcdh10      |
| Coq5    | Stac2       |
| Lrrc47  | Ovca2       |
| Timm44  | Ppih        |
| Kcnip2  | Farp2       |
| Emb     | Uck11       |
| Shank1  | Plcb4       |
| Abhd16a | Qars        |
| Dlst    | Cptp;Gltpd1 |
| Uqcrc1  | Spred3      |
| Scn1b   | Fxr1        |
| Gabra4  | Endog       |
| Gfap    | Rbmx11      |
| Cadm2   | Plekha7     |
| Rps9    | Ttc21b      |
| Sh3gl3  | Slc20a2     |
| Fnbp1   | Gan         |
| Cpne5   | Shd         |
| Dlg3    | Wdr18       |
| Psm3    | Pik3ap1     |

|              |          |
|--------------|----------|
| Efh1         | Celf4    |
| Eml2         | Polb     |
| Camk2g       | Lamtor5  |
| Phgdh        | Mpp5     |
| Nqo2         | Acat3    |
| Pdia6        | Bzw1     |
| Magi2        | Wdfy2    |
| Ralgapa1     | Apc      |
| Crym         | Unc13d   |
| Trappc12     | Mrpl15   |
| Slc25a1      | Akap9    |
| Arl3         | Tsr1     |
| Nceh1        | Gls2     |
| Rab2a        | Serbp1   |
| Zmpste24     | Kptn     |
| Slc2a1       | Bcas2    |
| Cep170b      | Nvl      |
| Eci2         | Slitrk2  |
| Scyl2        | Rab3d    |
| Serinc1      | Tpm4     |
| Rab31        | Naa15    |
| Enoph1       | Kcnj3    |
| Ranbp1       | Tmed1    |
| Dpysl2       | Diablo   |
| Mocs3        | Dynlt3   |
| Fnbp1        | Ift122   |
| Cdc42bp<br>b | Cnnm4    |
| Clybl        | Cdc42ep2 |
| Frrs11       | Pex1     |
| Tubgcp2      | Rpgr     |
| Rab8a        | Syap1    |
| Them6        | Mon1a    |
| Brcc3        | Tmem55b  |
| Tubb2b       | Mmaa     |
| Psd3         | Slc1a5   |
| Psmc9        | Taf2     |
| Scamp3       | Snapin   |
| Gspt1        | Dtx3l    |
| Nf1          | Sema6a   |
| Prmt5        | Gm15800  |
| Qdpr         | Tab2     |
| At12         | Lrrc58   |
| Pafah1b1     | Ddx59    |

|               |               |
|---------------|---------------|
| Rpl12         | Wdr11         |
| Sco2          | Uimc1         |
| Usp5          | Phka2         |
| Lmtk3         | Myo10         |
| Uhrf1bp1<br>1 | Ugt8          |
| Abcb7         | Lhx2          |
| Tln2          | Ube2g2        |
| Ak3           | Ogdhl         |
| Mpp1          | Prkcq         |
| Snph          | Ireb2         |
| Rab4a         | Stmn4         |
| Ube2l3        | Uck2          |
| Tmod1         | Gstm4         |
| Stxbp5l       | Clptm1l       |
| Cyb5r3        | Kmt2d         |
| Otub1         | Tmsb4x        |
| Blvrb         | Nudt9         |
| Sar1b         | Ahnak2        |
| Ak2           | 3110043O21Rik |
| Sarm1         | Mob1a         |
| Dctn3         | Coro6         |
| Hsd17b4       | Dpp7          |
| Smpd3         | Ncapd2        |
| Ermp1         | Baalc         |
| Psmc1         | Rps11         |
| Glo1          | Snrpa;Gm5145  |
| Ntrk2         | Angel2        |
| Dhrs7b        | Mvb12a        |
| Gpr37l1       | Eif2b5        |
| Trappc3       | Wnk3          |
| Tom1l2        | Itfg3         |
| Etfa          | Gprasp2       |
| Cend1         | Pml           |
| Stk24         | Dcaf13        |
| Vps4b         | Rrp7a         |
| Stt3a         | C8a           |
| Necab2        | Phf3          |
| Adam23        | Sptlc1        |
| Pick1         | Atp11b        |
| Spag9         | Rbm28         |
| Drd1          | Krt36         |
| Gabra1        | Vldlr         |
| Kcnc1         | Ralgps1       |

|         |           |
|---------|-----------|
| Rac3    | Ptgfrn    |
| Arl8b   | Mroh1     |
| Mpp2    | Isg15     |
| Sec13   | Zgpat     |
| Vcan    | Yap1      |
| Stx8    | Vrk2      |
| Capns1  | Serpinb6b |
| Dock3   | Nudt12    |
| Cacng4  | Pcmt1     |
| Rab3a   | Pde1c     |
| Magi1   | Naaa      |
| Macf1   | Lurap1    |
| Lyst    | Ddx19b    |
| Bcl2l1  | Wipf1     |
| Myo5a   | Icam1     |
| Cpd     | Rqcd1     |
| Eef2    | Btd       |
| Kcnip4  | Lpar1     |
| Ubqln1  | Ptcd2     |
| Atp6ap2 | Ahsa2     |
| Cry1l   | Rbx1      |
| Gpsm1   | Rmdn2     |
| Eif2s3x | Brix1     |
| Srp54   | Otub2     |
| Rabggta | Ccdc22    |
| Cct6a   | Atp5j2    |
| Ppfia3  | Mex3d     |
| Cops4   | Taf9      |
| Dst     | Vstm2l    |
| Cadm1   | Nek9      |
| Trnt1   | Slc7a4    |
| Plxna1  | Kcnc2     |
| Acbd6   | Wdr62     |
| Ttc7b   | Setd1a    |
| Ddx3x   | Zc3hc1    |
| Uqcrb   | Crabp1    |
| Flii    | Dvl3      |
| Pls3    | Prkd1     |
| Lrfr4   | Snx25     |
| Slc12a5 | Gemin5    |
| Begain  | Ddx51     |
| Ykt6    | Aars2     |
| Dlgap4  | Nrbf2     |



|         |                  |
|---------|------------------|
| Scn1a   | Nudt4            |
| Sh3glb1 | Fam103a1;Gm10767 |
| Cacna1b | Znf800;Zfp800    |
| Mthfd11 | Polr3f           |
| Gprin3  | Smarca4          |
| Gak     | Cntf             |
| Psmc6   | Mcf21            |
| Wfs1    | Palm2Akap2;Akap2 |
| Ndufs7  | Lcmt2            |
| Coq6    | Mcm4             |
| Ndufa9  | Col1a1           |
| Pag1    | Dynlrb2          |
| Mrps27  | Sec11c           |
| Sort1   | Glipr2           |
| Tanc2   | Ncf1             |
| Shmt2   | Tceb2            |
| Syt17   | P4htm            |
| Ttc9b   | Snx19            |
| Lrpprc  | Asns             |
| Trim3   | Ttbk1            |
| Dcun1d3 | Ppfia1           |
| Mapre3  | Kiaa0907         |
| Ahcy    | Pde4dip          |
| Ndufs2  | Atp5o            |
| Fahd2   | Rpl31            |
| Akap5   | Uhrf2            |
| Grin1   | Zyx              |
| Gpx4    | Nudt21           |
| Rptor   | Rgs10            |
| Usp9x   | Exosc8           |
| Timm9   | Casd1            |
| Ubxn6   | Atp5i            |
| Katnb1  | Klhdc4           |
| Cdh2    | Ncoa7            |
| Vdac2   | Rpl15;Gm10020    |
| Chmp4b  | Rab9a;Rab9       |
| Gmppb   | Gmeb1            |
| Eif6    | Sat2             |
| Ddt     | Pnlsr            |
| Cacnb4  | Sars             |
| Bphl    | Fbxl20           |
| Ggt7    | Fam21            |
| Pygb    | Kank1            |

|                       |              |
|-----------------------|--------------|
| Chrm4                 | Kcnn2        |
| Nfs1                  | Man1b1       |
| Dnaja3                | Scn2a1       |
| Aldh1l2               | Hnrnpul1     |
| Arhgap21              | Kif3b        |
| Epdr1                 | Hcfc1        |
| Cct7                  | Unc119       |
| Copb1                 | Faim         |
| Slc9a7                | Bend6        |
| Dmwd                  | Klhl4        |
| Vat1                  | Tbcc         |
| Pik3r1                | Rps24        |
| Scamp5                | Mrpl20       |
| Acot1                 | Plg          |
| Nisch                 | Morc3        |
| Galc                  | Garnl3       |
| Me3                   | Aldh1a2      |
| Rab15                 | Spg11        |
| Plxnb1                | Magoh;Magohb |
| Nipsnap3<br>b         | Sema4b       |
| Lrrtm2                | Smad3        |
| Scn2b                 | Hnrnpr       |
| Rhoa                  | Lpl          |
| Ryr2                  | Zc3hav1      |
| Mlst8                 | Vrk1         |
| Gps1                  | Phf8         |
| Prrt2                 | Gpt          |
| Calb1                 | Slitrk5      |
| Pgm211<br>GOLGA7<br>B | Lum<br>Chrm3 |
| Adh5                  | Serpine2     |
| Agpat4                | Naa16        |
| Tubb4a                | Ncor1        |
| Mff                   | Tnfrsf21     |
| Tomm20                | Trak1        |
| Mtor                  | Pthrhd1      |
| Glul                  | Acsm4        |
| L2hgdh                | Fam129b      |
| Epb4113               | Mtfmt        |
| Psma3                 | Itgb5        |
| Vps29                 | Scubel       |
| Clip1                 | Ccm2         |

|         |         |
|---------|---------|
| Gspt2   | Rac2    |
| Tmem63  |         |
| b       | Adcy2   |
| Sncg    | St3gal4 |
| Vamp7   | Nucb2   |
| Pgm3    | Gng12   |
| Syt3    | Cpeb3   |
| Carm1   | Gm20498 |
| Gsr     | Kctd5   |
| Wipf3   | Fam134c |
| Sult4a1 | Klhdc2  |
| Gas7    | Fbxw9   |
| Itgb8   | Srsf1   |
| Gprin1  | Xrn2    |
| Xpo7    | Megf9   |
| Git2    | Dtx3    |
| Ndufb10 | Tfdp1   |
| Aldh1b1 | Hp      |
| Tjp1    | Rpa2    |
| Rgs9    | Fbln2   |
| Ndufb4  | Nop58   |
| Pdhx    | Xpo4    |
| Mapk8   | Usp35   |
| Grin2a  | Tia1    |
| Nt5e    | Pbrm1   |
| Fam136a | Sap30   |
| Stk32c  | Gatad2a |
| Akr1b7  | Chmp5   |
| Tmem14  |         |
| 3       | Clstn3  |
| Synj2bp | Helz    |
| Psmb6   | Med29   |
| Rimbp2  | Limd1   |
| Map4    | Lsm4    |
| Sfxn1   | Prps2   |
| Bin1    | Nsun5   |
| Rap2b   | Tcp1112 |
| Srgap2  | Anapc7  |
| Arhgdia | Tcof1   |
| Slc6a11 | Cbln3   |
| Napg    | Yjefn3  |
| Spr     | Nwd1    |
| Paics   | Edc3    |
| Rtn1    | Supv311 |

|          |                |
|----------|----------------|
| Dgke     | Cnot7          |
| Slc30a9  | Spns1          |
| Adprh    | Pggt1b         |
| Itgam    | 15-Sep         |
| Coa3     | 9930111J21Rik2 |
| Myl12b   | Zfp871         |
| Gabra3   | Pycrl          |
| Acp6     | Arsb           |
| Prmt8    | Sf3b2          |
| Ap1m2    | Slc39a6        |
| Arf5     | Gorasp1        |
| Prkcg    | Kcnh7          |
| Dnm3     | Ddx17          |
| Acat1    | Abca9          |
| Coa7     | Fuk            |
| Tpi1     | Ddn            |
| Ap2s1    | Gla            |
| Cnksr2   | Supt5h         |
| Pkm      | Mast3          |
| Arhgef12 | Rint1          |
| Rgs20    | Wars           |
| Pdia4    | Mmgt1          |
| Ttc1     | Ube2q1         |
| Fbxo3    | Leng8          |
| Elmod1   | Slc5a3         |
| Psmc6    | Anapc1         |
| Rnf141   | Nsrp1          |
| Fbxo41   | Itga7          |
| Slc44a1  | Ppp1r8         |
| Osbpl2   | Gng5           |
| Mfn2     | Lims1          |
| Ptges3   | Rcor1          |
| Tmx1     | Arsk           |
| Alg2     | 5031439G07Rik  |
| Pgam1    | Cdk12          |
| Chmp1a   | Tbc1d23        |
| Maob     | Pid1           |
| Slmap    | Kif19;Kif19a   |
| Wbp2     | Pcdhgc5        |
| Pex5l    | Cep192         |
| Negr1    | Slu7           |
| Sri      | Stfa3          |
| Tpbp     | Adat3          |

|         |                     |
|---------|---------------------|
| Uchl5   | Smg7                |
| Itpka   | Malt1               |
| Setd7   | Dhcr24              |
| Timm13  | Phldb1              |
| Ca2     | Anp32a              |
| Sec23a  | Aagab               |
| Taok1   | Runx1t1             |
| Wdr48   | Kpna4               |
| Atp1a3  | Slc25a45            |
| Tkt     | Stat3               |
| Uso1    | Lhpp                |
| Pdpk1   | Atp5a1              |
| Vps13a  | Pik3r2              |
| Akr7a2  | Nat9                |
| Acaca   | Enc1                |
| Psm13   | Eif3d               |
| Ccny    | Camk2n2             |
| Cisd1   | Enpp2               |
| Vapa    | Mmp17               |
| Cdc42   | Znf143              |
| Slc25a3 | Ptpn3               |
| Ctbp1   | Cdc42se2            |
| Gap43   | Aqr                 |
| Appl1   | Ankfy1              |
| Clcn3   | N4bp1               |
| Cpne3   | Bbs1                |
| Ndr3    | Mcm3ap              |
| Dip2b   | ORF11;0610007P14Rik |
| Lrpap1  | Smek2               |
| Chkb    | Maged2              |
| Gba     | Pih1d1              |
| Cryz1   | Pde3a               |
| Mat2a   | Fdx1                |
| Clic1   | Dpf2                |
| Lmna    | Fgd3                |
| Pak2    | Mrpl51              |
| Sgtb    | Nav1                |
| Capn2   | Arih2               |
| Ywhab   | Morn4               |
| Timm50  | Comm4               |
| Map2k6  | Bcar1               |
| Cyfp1   | Fbxo31              |
| Sec31a  | Cd93                |

|          |                |
|----------|----------------|
| Eif4e    | Cdh7           |
| Madd     | Maea           |
| Cacna2d2 | Supt16;Supt16h |
| Sdhb     | Cul9           |
| Selenbp1 | Syt13          |
| Osbp     | Gtf3c5         |
| Pabpc1   | Spata2         |
| Gnl1     | Fam84b         |
| Nagk     | Pik3c2a        |
| Bcas3    | Cyp2j9         |
| Ssr1     | Tatdn1         |
| Pacs1    | Wdr65          |
| Inpp5a   | Usp20          |
| Dgki     | Islr           |
| Iqsec3   | Supt71         |
| Ttpal    | Nup50          |
| Unc13c   | Rps6           |
| Mmab     | Nova1          |
| Prkar2b  | Dysf           |
| Pde10a   | Cyp4x1         |
| Rab3c    | Hat1           |
| Dld      | Zfyve26        |
| Bcr      | Daglb          |
| Nit1     | Lmnb2          |
| Plscr3   | Nyap1          |
| Tab1     | Cdc27          |
| Slc1a6   | Atg13          |
| Lrrc57   | Nsg1           |
| Camk2b   | Mettl9         |
| Islr2    | Krt84          |
| Tagln2   | Irf5           |
| Grm2     | Trim56         |
| Bmpr2    | Plexd2         |
| Atad3    | Uqcr11         |
| Pafah1b3 | Dus2           |
| Ppa1     | Cbr2           |
| Pdhb     | Rbm3           |
| Ndufb8   | Camsap1        |
| Synrg    | Mrpl41;Gm6434  |
| Hpca     | Ppm11          |
| Acaa1a   | Hdac3          |
| Uqcrfs1  | Gyg1;Gyg       |
| Psmc2    | Qsox2          |

|           |               |
|-----------|---------------|
| Gabarapl2 | Rtkn          |
| Mdh2      | Ppp1r12b      |
| Ntng1     | Plxdc2        |
| Abcb9     | Ddx39a        |
| Pls1      | Clpb          |
| Cops6     | Trip11        |
| Atp9a     | Klhl2         |
| Crkl      | Tubb6         |
| Nol3      | Chdh          |
| Rpsa      | Tlr2          |
| Ap2a2     | Actr5         |
| Pted3     | Dnph1         |
| Cspg5     | Ing4          |
| Gk        | Pcdha9        |
| Ogdh      | Vps41         |
| Reps1     | Zfyve19       |
| Lgi1      | Trmt61a       |
| Pcyox1    | Chd6          |
| Anks1b    | Map1lc3b      |
| Itgav     | Metap1        |
| Araf      | Akr1c14       |
| Colla2    | Tap2          |
| Pdcd6ip   | Chd3          |
| Slc4a3    | Nudt8         |
| Tmx3      | Rictor        |
| Efr3b     | Ints5         |
| Agap1     | Polr2i        |
| Nsf       | Adam17        |
| Cpm       | Pcbd1         |
| Tm9sf2    | Pxdn          |
| Prkar1a   | Pigt          |
| Synj1     | Ust           |
| Aco1      | Tmem63a       |
| Snca      | Il6st         |
| Taldo1    | Slc25a29      |
| Hspa4     | Eftud2        |
| Gstm5     | Rrp1b         |
| Slc22a23  | Vmp1          |
| Rab23     | Polr2h        |
| Aldoa     | Pop1          |
| Tom1      | Ppp4c         |
| Pgls      | 2900011O08Rik |
| Actr10    | C3            |

|              |               |
|--------------|---------------|
| Exog         | Itpkb         |
| Akap7        | Krt222        |
| Myo18a       | Fam110b       |
| Cntnap2      | Rgs17         |
| Vat1l        | Klc3          |
| Npepps       | Pdel          |
| Wdr37        | Fat1          |
| Ccdc136      | Ube2e3        |
| Myadm        | Gigyf2        |
| Hccs         | Dab2          |
| Arhgef6      | Pdf           |
| Ank2         | Calu          |
| Anxa4        | Lmf2          |
| Plcg1        | Rhot2;Gm20683 |
| Ap3m2        | Ptprg         |
| Sec22b       | Phip          |
| Prkcd        | Poldip3       |
| Hip1         | Plce1         |
| Gnaz         | Zeb2          |
| Ldha         | Klc4          |
| Cul1         | Eif2a         |
| Eif4a1       | Clcn7         |
| Ppp1r9b      | Gpx7          |
| Ywhag        | Gpam          |
| Nefl         | Golim4        |
| Hsd17b1<br>2 | Trmt1         |
| Nif311       | Trim30a       |
| Syt7         | Stk4          |
| Gnb4         | Prc1          |
| Src          | Yipf5         |
| Slc25a46     | Taf4a         |
| Tbcd         | Mta1          |
| Vwa8         | Gab1          |
| Trappc9      | Camlg         |
| Me1          | Rgs12         |
| Neo1         | Ca4;Car4      |
| Crk          | Coil          |
| Atp6v0d1     | Gpr50         |
| Sgip1        | Aaas          |
| Exoc4        | Carns1        |
| Plec         | Top3b         |
| Hdhd2        | Qpct          |
| Ndufs5       | Prpf40a       |



|          |               |
|----------|---------------|
| Dynll2   | Slc13a3       |
| Sigmar1  | Man2b1        |
| Prkaca   | Ehhadh        |
| Nudt3    | Fam105a       |
| Sptb     | Mrpl4         |
| Pgrmc1   | Ggt1          |
| Reep5    | Dpm1          |
| Gpc4     | Gtf3c2        |
| Pfkm     | Rnf170        |
| Pitpnb   | BC005561      |
| Nfasc    | Tead1         |
| Kpna3    | Rpl30         |
| Mbp      | Mtm1          |
| Ckmt1    | Prpf6         |
| Stk11    | Rbm19         |
| Gripap1  | Phka1         |
| Nadk2    | Smn1          |
| Cyb5b    | Naa20         |
| Wdfy3    | Ypel5         |
| Cmpk2    | Ccpg1         |
| Nlgn3    | Ergic3        |
| Ppp1r7   | Abca3         |
| Mtnd1    | Ntsr1         |
| Rgs7     | Rps6kb2       |
| Fh       | Cisd2         |
| Ptk2b    | Chpf2         |
| Eps15    | Ube4a         |
| Strn     | Stx2          |
| Pgp      | Cmc2          |
| Hspa1a   | Fyb           |
| Lrrc8b   | Sardh         |
| Nipsnap1 | Poren         |
| Vps16    | Pnn           |
| Ptprj    | Fkbp2         |
| Ppt1     | Trappc6b      |
| Samm50   | Bfar          |
| Sfxn3    | Polr1e        |
| Map2k4   | Nup133        |
| Nlgn1    | Tbl2          |
| Gnai1    | Ap4s1         |
| Ranbp9   | Mrpl37        |
| Ndufb9   | 2610301B20Rik |
| Zadh2    | Mocos         |

|          |               |
|----------|---------------|
| Bpnt1    | Cd82          |
| Ptpna    | Serpina3g     |
| Slc23a2  | Erap1         |
| Pcmt1    | Camk1         |
| Cpne1    | Apob          |
| Kif5b    | Brat1         |
| Add2     | Commd8        |
| Sfn      | Pak6          |
| Vps36    | St7           |
| Prdx1    | Dhx32         |
| Tcp1111  | Dcx           |
| Dnm1     | Wdr17         |
| Ptprr    | Tdrd3         |
| Pycr2    | Gtf2h1        |
| Arfgef2  | Zbp1          |
| Rph3a    | Msh3          |
| Anxa11   | Arhgap31      |
| Arf3     | Dner          |
| St13     | Stard13       |
| Flot1    | Abhd11        |
| Slc25a14 | Fam184b       |
| Cse11    | Nfix          |
| Bnip3    | Fbxl18        |
| Ppp1r12a | Mrps17        |
| Pdk1     | Ctss          |
| Ch11     | Afap112       |
| Sec14l2  | Pcmt2         |
| Atp6v0a2 | Itgb1bp1      |
| Slc17a7  | Sorcs1        |
| Lonp1    | Mrps6         |
| Hspa2    | Srbd1         |
| Prune2   | Ctsz          |
| Vamp3    | Rela          |
| Hadha    | Pla2g4a       |
| Neto1    | Mrpl44        |
| Gsg11    | Zfp185;Znf185 |
| Mecr     | Ehbp111       |
| Rbbp9    | Dcun1d5       |
| Gna13    | Flrt2         |
| Vta1     | Et14;Skt      |
| Nucb1    | Slc25a19      |
| Vt1a     | B2m           |
| Clasp2   | Cox6a1        |

|          |         |
|----------|---------|
| Arhgap26 | Selo    |
| Park7    | Atp8a2  |
| Abcb10   | Sash1   |
| Wasf1    | Setd2   |
| Bcan     | Cx3cl1  |
| Map1a    | Cstf2   |
| Prkcb    | Prrc2b  |
| Hebp1    | Chrna4  |
| Slc4a10  | Ncapd3  |
| Ppp2cb   | Smpd13a |
| Phb      | Rpl5    |
| Ppp1r1b  | Nfia    |
| Sirt2    | Gpc2    |
| Psmal    | Rlbp1   |
| Jagn1    | Slco1c1 |
| Coasy    | Echdc2  |
| Slc18a2  | Pianp   |
| Oat      | Vamp8   |
| Apbb1    | Actg1   |
| Ncam1    | Ppt2    |
| Cttnbp2  | Psen1   |
| Hmox2    | Nav2    |
| Pex14    | Cep68   |
| Myh14    | Tmub1   |
| Gfod1    | Gemin4  |
| Rmdn3    | Ptp4a3  |
| Chp1     | Hcfc2   |
| Vps45    | Poc1a   |
| Esd      | Acan    |
| Tpm1     | Gosr2   |
| Dlgap1   | Tep1    |
| Gabbr1   | Rrp1    |
| Unc5a    | Sirt3   |
| Snx5     | Lrp4    |
| Ehd4     | Mctp1   |
| Snap25   | Col4a5  |
| Kcnab1   | Ptpro   |
| Arpc4    | Cuedc1  |
| Csnk2a2  | Nup214  |
| Nrxn1    | Aarsd1  |
| Sptbn1   | Ttbk2   |
| Nptn     | Haus6   |
| Slc1a4   | Hexdc   |

|         |               |
|---------|---------------|
| Armc1   | Edil3         |
| Glrx    | Pfdn4         |
| Praf2   | Rps6ka4       |
| Slc6a7  | Prrc1         |
| Plxna3  | Krt86         |
| Chchd3  | Kif1c         |
| Gnao1   | Arhgap9       |
| Nampt   | Cep97         |
| Ccz1    | Zcrb1         |
| Stx7    | Cyth4         |
| Oxct1   | Mest          |
| Sorbs1  | Rab39a        |
| Ube2v1  | Pygl          |
| Gapvd1  | Bpgm          |
| Adsl    | Snx12         |
| F3      | Nedd1         |
| Ap3b2   | Hen3          |
| Taok3   | Fam171b       |
| Psmc4   | Csnk1g3       |
| Erc2    | Ccdc101       |
| Coro1c  | Pik3ca        |
| Ggps1   | Phf2          |
| Secpdh  | Pold3         |
| Bag6    | Cetn2         |
| Kcna1   | Ascc3         |
| Pin1    | Phkg1         |
| Fmnl3   | Lsm7          |
| Dock9   | Lama5         |
| Nt5c3a  | Arhgef17      |
| Kazn    | Xrcc6bp1      |
| Numb1   | Apobec1       |
| Slc16a1 | Coro7         |
| Ruvbl1  | Krtap13-1     |
| Dnajc6  | Phc3          |
| Rab21   | Gpt2          |
| Ipcef1  | Akr1b10       |
| Tmem43  | C1qtnf5       |
| Prkag1  | Eral1         |
| Sphk2   | Ankh          |
| Syt12   | Ano6          |
| Lamp1   | Nf2           |
| Nckip5d | 2210016F16Rik |
| Ntm     | Med19         |

|         |          |
|---------|----------|
| Dnaja1  | Spag1    |
| Ganab   | Fam102b  |
| Slc29a1 | Rab3ip   |
| Fdps    | U2af2    |
| Rp2     | Sdpr     |
| Rheb    | Os9      |
| Tph2    | Mpped2   |
| Abi2    | Myrf     |
| Dmx11   | Gramd1a  |
| Ndufa5  | Mycbp2   |
| Lingo1  | Tmem132e |
| Nt5dc3  | Parva    |
| Shroom2 | Fdft1    |
| Gldc    | Themis2  |
| Mcu     | Cbx3     |
| Gphn    | Psmb8    |
| Mrps22  | Irf2bp1  |
| Tmed10  | Drap1    |
| Tbc1d24 | Timm8b   |
| Olfm3   | Sema6b   |
| Faf2    | Xkr7     |
| Dcc     | Acap3    |
| Rhob    | Cc2d1b   |
| Atp1a1  | Ago1     |
| Impdh2  | Bola3    |
| Immt    | Fhl2     |
| Slc30a1 | Mrpl28   |
| Lypla1  | Kank4    |
| Cct2    | Yy1      |
| Idh3g   | Zc3h4    |
| Cox4i1  | Rpl37a   |
| Chchd6  | Snrpg    |
| Calb2   | Fbxo30   |
| Cds2    | Mrps14   |
| Txnrd2  | Fam76b   |
| Cdh11   | Srsf11   |
| Rab12   | Nrd1     |
| Pacsin2 | G6pc3    |
| Idi1    | Rpl34    |
| Clint1  | Kng1     |
| Paip1   | Gatm     |
| Mdp1    | Trim28   |
| Dcaf7   | Smpx     |

|         |               |
|---------|---------------|
| Scn4b   | S100a16       |
| Doc2a   | Dgcr14        |
| Unc13a  | Gas6          |
| Pip4k2b | Dcaf8         |
| Ywhae   | Drg1          |
| Dpp6    | Dhx58         |
| Arc     | Tfdp2         |
| Nudc    | 2010300C02Rik |
| Ndufaf2 | Golga2        |
| Crybb1  | Des           |
| Rock2   | Slc35g2       |
| Fech    | Lrfr5         |
| Tpm3    | Kif4          |
| Eif2s1  | Serpina1c     |
| Plcl1   | Inpp5b        |
| Wasl    | Eml3          |
| Akt3    | Ids           |
| Apool   | Bdnf          |
| Eef1a1  | Smnnc1        |
| Hnrnp1  | Prkg1         |
| Gria1   | Arx           |
| Psmc4   | Znf22         |
| Vapb    | Ctuf1         |
| Coro2b  | Aven          |
| Hprt1   | Rbfox3        |
| Nrxn3   | Soat1         |
| Atic    | Mcm6          |
| Cdk16   | Rai1          |
| Ppid    | Pet112        |
| Atp1b1  | Cutc          |
| Vps18   | Plekho1       |
| Vps11   | Sp1           |
| Vcp     | Foxred1       |
| Anxa7   | Lrch3         |
| Fasn    | Rsrc1         |
| Gpd1    | Kdm5a         |
| Sorcs2  | Spef2         |
| Mgst3   | Exosc4        |
| Grm8    | Ap5z1         |
| Pgs1    | Myof          |
| Uchl3   | Nsmf          |
| Stmn3   | Cdh5          |
| Sh2d5   | Cradd         |

|          |                |
|----------|----------------|
| Scarb2   | Npc1           |
| Mtmr9    | Pxn            |
| Cd81     | Fat3           |
| Dync1li2 | Bre            |
| Pip5k1a  | Lrrc8c         |
| Nudt5    | Med27          |
| Iqsec2   | Prcp           |
| Gdi1     | Spta1          |
| Tsr2     | Tfap2a         |
| Atp2a2   | Pdzd8          |
| Dctn2    | Cth            |
| Dsp      | Sqstm1         |
| Capn5    | C1qb           |
| Slc8a2   | Loh12cr1       |
| Cnrip1   | Tcea1          |
| Cacybp   | Reep2          |
| Sirpa    | Paccin3        |
| Gsk3a    | Jak1           |
| Gabra5   | Kcnh2          |
| Rab8b    | Obfc1          |
| Ppp3ca   | Tbc1d8         |
| Phactr1  | Nip7           |
| Aldoc    | Hnrnpa3        |
| Calcoco1 | Acss3          |
| Tmem13   |                |
| 2a       | 05-Mar         |
| Dpysl5   | Csl            |
| Ankrd63  | Colgalt1       |
| Vps33a   | Ankrd52        |
| Pptc7    | Srxn1          |
| Aak1     | Mobp           |
| Ehd3     | Sf3a1          |
| Aplp2    | Usp54          |
| Slc10a4  | Tspyl4         |
| Camk2d   | Nenf           |
| Icam5    | Sf1            |
| Acad8    | Pdcd4          |
| Pdk2     | Zmiz1          |
| Tln1     | Prkdc          |
| Dlg2     | Usp33          |
| Syn2     | Hsd17b8;H2-Ke6 |
| Dtymk    | Hdlbp          |
| Grm1     | Oxnad1         |
| Rmnd5a   | Snx14          |

|          |                                         |
|----------|-----------------------------------------|
| Syt5     | Slc25a32                                |
| Pfkip    | Rbms3                                   |
| Ppfia2   | Rars                                    |
| Gpm6a    | Cbln4                                   |
| Mpp6     | Prkx                                    |
| Rcan1    | Fli1                                    |
| Eci1     | Hacl1                                   |
| Eif31    | Top2b                                   |
| Tgm1     | Rc3h1                                   |
| Rab30    | Unc79                                   |
| Wnk2     | Lbh                                     |
| Snx27    | Gpkow                                   |
| Pacs2    | Alg5                                    |
| Ncan     | Nrp2                                    |
| Atp6v1f  | Pcdh7                                   |
| Gabrb1   | Ccnt1                                   |
| Slc25a5  | Fam168a                                 |
| Actn1    | Akna                                    |
| Mink1    | Slc39a12                                |
| Abat     | Morf4l2                                 |
| Dlgap2   | Azi2                                    |
| Rims1    | Csad                                    |
| Rpl13    | Pdap1                                   |
| Strn3    | Tmem2                                   |
| Slc25a10 | Kcnb1                                   |
| G6pdx    | Cox7a2l                                 |
| Chn1     | Acy1                                    |
| Sh3gl2   | Glyctk                                  |
| C1ql3    | Nr3c1                                   |
| Rad23b   | Lclat1                                  |
| Psmb7    | Yars2                                   |
| Hsd12    | Ercc5                                   |
| Slc1a3   | Kpna2                                   |
| Sv2b     | Impad1                                  |
| Hsp90ab1 | Hist1h2af;Hist1h2ab;Hist1h2ak;Hist1h2ah |
| Ephx1    | Man2a2                                  |
| Slc9a1   | Dcps                                    |
| Fmnl1    | Ttll12                                  |
| Chat     | Col6a2                                  |
| Stat1    | Ormdl2                                  |
| Dagla    | Anapc2                                  |
| Rab6b    | 02-Mar                                  |
| Vps4a    | Mphosph8                                |



|         |          |
|---------|----------|
| Nedd4   | Cul7     |
| Rps5    | Cebpzos  |
| Sik3    | Znf24    |
| Cbr3    | Rpusd2   |
| Nbea    | Myo9a    |
| Rdx     | Fbrsl1   |
| Syng1   | Phykp1   |
| Rab27b  | Ptgs1    |
| Blmh    | Plekhh1  |
| Slc24a4 | Zic2     |
| Cntn1   | Exosc2   |
| Mark1   | Trpm7    |
| Aldh1a1 | Wdr20    |
| Rpn2    | Kras     |
| Eif5a   | Ccdc85b  |
| Traf3   | Atf2     |
| Slc1a2  | Cwf19l2  |
| Hcn2    | Elp6     |
| Mag     | Nsd1     |
| Rogdi   | Eif4ebp2 |
| Cacng8  | Taco1    |
| Mapre1  | Vars     |
| Ttyh3   | Rnmt     |
| Uqcr10  | Sec24c   |
| Tenm1   | Mkrm1    |
| Cpt2    | Gtpbp6   |
| Vps35   | Mapk14   |
| Cfl2    | Prdm2    |
| Csmd1   | Tbc1d8b  |
| Sgsm1   | Exosc9   |
| Pip5k1c | Ppic     |
| Suclg2  | Nell2    |
| Epn2    | Syf2     |
| Timm23  | Nrn11    |
| Aifm3   | Pcp2     |
| Ppox    | Gfm2     |
| Myh9    | Pkn2     |
| Gde1    | Ptpn13   |
| Ppp6c   | Arfgap3  |
| Ccdc51  | Znf148   |
| Lap3    | Fam134b  |
| Acyp1   | Cfdp1    |
| Psm14   | Txlng    |

|          |                    |
|----------|--------------------|
| Rps6ka1  | Mto1               |
| Stoml2   | St3gal6            |
| Cpne8    | Podxl              |
| Apba1    | Chuk               |
| Nckap1   | Cyp2a5             |
| Grb2     | Hnrnp11            |
| Mpc2     | Rhoq               |
| Smcr8    | Rgs7bp             |
| Tsn      | Prkrir             |
| Kpnb1    | Snrpd3             |
| Btbd17   | Fig4               |
| Ahsa1    | Arfrp1             |
| Rab39b   | Rpf2               |
| Atp6v1h  | Itga5              |
| Mapk1    | Eif4g1             |
| Amph     | Ankhd1             |
| Nlgn4l   | Dhx8               |
| Aldh3a2  | Aldh3b1            |
| Nck2     | Fez1               |
| Nfu1     | Pstpip1            |
| Hspa9    | Arhgap12           |
| Tpd52    | Nudt14             |
| Ccdc177  | Fntb               |
| Ipo4     | Cpsf1              |
| Cdk14    | Vps8               |
| Il1rap11 | Sec23b             |
| Psmc7    | Epb4.114b;Epb4114b |
| Ppp6r1   | Bod11              |
| Atp6v1g1 | Sema6d             |
| Sod1     | Jakmip3            |
| Ppp1ca   | Map3k7             |
| Tmem9b   | Usp34              |
| Rab5a    | Smarcc1            |
| Pura     | Slmo1              |
| Flna     | Nek1               |
| Tenm3    | Supt6h             |
| Mccc2    | Fkbp1              |
| Plxnc1   | Serpina1a          |
| Msra     | Akt2               |
| Flrt3    | Plcb2              |
| Pitpna   | Eno3               |
| Arhgap39 | Celf2              |
| Echdc1   | Rbm38              |

|          |                        |
|----------|------------------------|
| Akap12   | Pus7                   |
| Rps6ka3  | Mrpl17                 |
| Dync1h1  | Uba3                   |
| Mtfp1    | Ildr2                  |
| Plaa     | Ctnna3                 |
| Abhd10   | Lrrn1                  |
| Prnp     | Bnip1                  |
| Ctsd     | Cxx1b                  |
| Cox6b1   | Smarca5                |
| Usp7     | Msto1                  |
| Acat2    | Pla2g6                 |
| Trim32   | Rnf40                  |
| Scfd1    | Mon2                   |
| Rap1gap2 | Csf1r                  |
| Cd47     | C530008M17Rik;Kiaa1211 |
| Ckap4    | Tex2                   |
| Slc18a3  | Mvp                    |
| Epha4    | Cpsf2                  |
| Smpdl3b  | Cog4                   |
| Clcn6    | Ero11                  |
| Cat      | Kat8                   |
| Get4     | Ank1                   |
| Slc25a4  | Slc4a1                 |
| Psmb2    | Hddc3                  |
| Fabp3    | Ube3b                  |
| Csrp1    | Slc5a6                 |
| Rapgef4  | Rnf11                  |
| Rala     | Hist1h2bc;Hist1h2bh    |
| Cryab    | Ninj1                  |
| Ptges2   | Golt1b                 |
| Myl6     | Tmed3                  |
| Hint1    | Kifc5b                 |
| Cltc     | Akt1s1                 |
| Padi2    | Igsf1                  |
| Tpd52l2  | Osbpl3                 |
| Ide      | Tmem41b                |
| Srm      | Rbm26                  |
| Ube2n    | Rae1                   |
| Nsfl1c   | Glb11                  |
| Ahcy11   | Abcb1a                 |
| Impa1    | Aspscr1                |
| Farp1    | Pcf11                  |
| Pitpnc1  | Tshz1                  |

|          |           |
|----------|-----------|
| Sfxn5    | Ighm      |
| Adk      | Mocs1     |
| Ncln     | Rpl23     |
| Mtpn     | Diexf     |
| Sptan1   | Ift46     |
| Aldh5a1  | Mcur1     |
| Tpt1     | Dennd4a   |
| Acadm    | Cspg4     |
| Cyp2s1   | Mknk1     |
| Rab3gap2 | Pgm1;Pgm2 |
| Srpk2    | Atg4c     |
| Camkv    | Dkk3      |
| Lanc12   | Sdf211    |
| Wdr45    | Dym       |
| Dnpep    | Cep131    |
| Eps1511  | Chst2     |
| Prpsap2  | Fubp3     |
| Arf1     | Wiz       |
| Hadh     | Pwp1      |
| Atp6v1d  | Hpx       |
| Pcbp2    | Dnajc8    |
| Pepd     | Thtpa     |
| Stx4     | Erbp4     |
| Acadv1   | Sphkap    |
| Rftn2    | Krtap15-1 |
| Arl1     | Smg9      |
| Uqcrc2   | Rpap1     |
| Tmx4     | Utp111    |
| Atp2b1   | Sepn1     |
| Dynll1   | Brd4      |
| Rad23a   | Tnip1     |
| Rtn4     | Slc27a2   |
| Cep170   | Ythdc2    |
| Fhl1     | Mipep     |
| Afg3l1   | Nole1     |
| Capza2   | Serpina3m |
| Hars2    | Tmem14c   |
| Sacm11   | Lifr      |
| Gfm1     | Rrs1      |
| Lysmd1   | Atad2     |
| Mareks   | Thsd7a    |
| Pmpcb    | Zcchc8    |
| Scn3b    | Cdc34     |

|          |            |
|----------|------------|
| Atp1b3   | Kifc3      |
| Strip2   | Nol8       |
| Mapk8ip3 | Map6d1     |
| Psme1    | Plp        |
| Ndufa7   | Vav1       |
| Opa3     | Arhgap17   |
| Actn2    | Dock2      |
| Dync1i2  | Orm1       |
| Oplah    | Abca5      |
| Cap1     | Pcp41      |
| Stub1    | Saal1      |
| Plcb1    | Utp18      |
| Rab5c    | Tarsl2     |
| Ppp3r1   | Msi2       |
| Prodh    | Dnajc1     |
| Rabep1   | Dos        |
| Tuba4a   | Bloc1s5    |
| Gnai3    | Cd2bp2     |
| Emc2     | Zcchc11    |
| Prkar1b  | Naa10      |
| Acot11   | Rhpn2      |
| Daam1    | Ifi47      |
| Dtnb     | Higd2a     |
| Rab10    | Zbed5      |
| Wdr77    | Rps27l     |
| Idh3a    | Eif3f      |
| Dnajb2   | Sgsm2      |
| Slc30a3  | Lrrc16b    |
| Cct4     | Ifngr2     |
| Glrx5    | Khdrbs1    |
| Timmdc1  | Fetub      |
| Pten     | Gadd45gip1 |
| Ndufv1   | Ikbip      |
| Cs       | Kcnab3     |
| Slc25a23 | Dohh       |
| Lin7c    | Las11      |
| Acot7    | Mgea5      |
| Klc2     | Mpp7       |
| Mtch1    | AI607873   |
| Adcy6    | Smc2       |
| Rac1     | Gabra6     |
| Thy1     | Slc8a3     |
| Arl2     | Tmod3      |

|          |               |
|----------|---------------|
| Osbp110  | Trappc10      |
| Hibadh   | Ephb3         |
| Psmb4    | Lyn           |
| Tfrc     | Noc2l         |
| L1cam    | Sdf2          |
| Cops2    | Eif5b         |
| Kcnj4    | Lym9          |
| Psm1     | Gfpt1         |
| Dlg4     | Pum1          |
| Plcd1    | Lppr1         |
| Psm12    | Mgat5         |
| Cnp      | Cast          |
| Tmem126a | Med8          |
| Dynlrb1  | Tsc22d3       |
| Cul3     | Kdm6a         |
| Gstm1    | 2010005H15Rik |
| Vps52    | Lrrc49        |
| Lsamp    | Macro1        |
| Glg1     | Obp1b;Gm14743 |
| Phyhip   | Cd9           |
| Snx6     | Rilp          |
| Gdap1    | Rnd3          |
| Rcn1     | Slc15a4       |
| Aldh6a1  | Dixdc1        |
| Cadm3    | Trim14        |
| Eif5     | Kdm4c         |
| Prdx6    | Btk           |
| Gabrb3   | Adprh2        |
| Nans     | Krr1          |
| Csnk1a1  | Gm996         |
| Becn1    | Aldh16a1      |
| Eif3e    | Ifi204        |
| Plch2    | Pigk          |
| Stmn1    | Wdfy4         |
| Olfm1    | Ckm           |
| Dusp3    | S100a4        |
| Zfyve1   | Bloc1s1       |
| Fam162a  | Creg2         |
| Atg7     | Gk5           |
| Uchl1    | Mettl7a1      |
| Rgs14    | Btf3          |
| Ak4      | D430041D05Rik |
| Exoc6b   | Fam20b        |

|          |               |
|----------|---------------|
| Sdha     | Tbr1          |
| Rin1     | Pmvk          |
| Slc25a51 | Plch1         |
| Lgals3   | Sec1414       |
| Tnik     | Cbx6          |
| Hspe1    | Casc3         |
| Htra2    | Pnpla6        |
| Dpysl3   | Rims2         |
| Gdpd5    | Mad211        |
| Evl      | Eif3k         |
| Decr1    | 1810043G02Rik |
| Cdc42bpa | Zhx2          |
| Pdxk     | Phpt1         |
| Dnm11    | Galnt2        |
| Acs15    | Hmgcs2        |
| Myh10    | Ssh3          |
| Tubb2a   | Copz2         |
| Acly     | Znf592        |
| Cpne4    | Zfp219        |
| Prkce    | Pxmp2         |
| Lpgat1   | Sepp1         |
| Osbp18   | Siglec1       |
| Slc7a8   | Fam63b        |
| Gnb2     | Arid1a        |
| Fam131b  | Aar2          |
| Csmd3    | Aamp          |
| Map1s    | Ilk           |
| Alad     | Lym7          |
| Sdk2     | Med10         |
| Etf1     | Rbp4          |
| Sdhc     | Wdr81         |
| Ppp2r1b  | Slc2a6        |
| Trappc11 | Luc712        |
| Dhrs1    | Cmtm5         |
| Acsf2    | Zdhhc3        |
| Ttyh1    | Kcnd3         |
| Itgb1    | Dennd5b       |
| Gls      | Uhrf1bp1      |
| Clta     | Elavl1        |
| Adck1    | Ldb1          |
| Dnaja4   | Rngtt         |
| Nit2     | Kirrel        |
| Fscn1    | Zfp462        |

|              |               |
|--------------|---------------|
| Cpne6        | Mrpl18        |
| Slc6a3       | Diap2;Diaph2  |
| Cab39        | Rpl23a        |
| Ppp2r5a      | Hrsp12        |
| Mark3        | Med12         |
| Vdac3        | Rab27a        |
| Ppm1b        | Cecr6         |
| Brsk2        | Als2          |
| Ddx3y        | Cdc42ep1      |
| Ywhaz        | Uba7          |
| Ddost        | Arpin         |
| Atad1        | Epb4.1        |
| Mtx2         | Rfc2          |
| Grm5         | Gltscr1       |
| My19         | Snrpe         |
| Tubb5        | Dph6          |
| Fam114a<br>2 | Zswim8        |
| Ralb         | Rabl6         |
| Dtna         | 2310061I04Rik |
| Slc25a12     | Sh3bp51       |
| Lamp5        | Esf1          |
| Twf1         | Samsn1        |
| Denr         | Gnpnat1       |
| Kcnd2        | Lats1         |
| Gstz1        | Smarce1       |
| Skp1         | Slfn5         |
| Fam210a      | Mkl2          |
| Smad2        | Insr          |
| Add1         | Wdr35         |
| Eno2         | Plekhf1       |
| Nipa1        | Limd2         |
| Efh2         | Stk3          |
| Slc5a7       | Srp72         |
| Cul5         | Ddx24         |
| Rragc        | Snx9          |
| Iba57        | Chrac1        |
| Ubtd2        | Kct2          |
| Nwd2         | Itih2         |
| Gdap1l1      | Stradb        |
| Slc9a3r1     | Srsf6         |
| Clvs1        | Rsph4a        |
| Camkk1       | Zfml;Znf638   |
| Rap1b        | Gpr108        |



|          |          |
|----------|----------|
| Atp8a1   | Ppp1r10  |
| Psmc8    | Mrps12   |
| Tbrg4    | Mrps2    |
| Mob4     | Slc1a1   |
| Sbf1     | Tor1aip2 |
| Slc7a14  | Prpf4    |
| Ola1     | Nid1     |
| Gda      | Inf2     |
| Ddi2     | Ubr7     |
| Stx12    | Der11    |
| Ndufb6   | Ankrd40  |
| Ttc9     | Plod2    |
| Exoc2    | Ubl3     |
| Ndufa10  | Plcg2    |
| Got2     | Ppap2b   |
| Acap2    | Degs1    |
| Hapln1   | Zfand2b  |
| Cox5b    | Klhl8    |
| Ptpn     | Mrpl11   |
| Rpl3     | Rpp38    |
| Pfn2     | mt-Co3   |
| Fis1     | Slc9a3r2 |
| Arf6     | Fus      |
| Bsg      | Rnf220   |
| Ptpnf    | Nup12    |
| Mif      | Micall1  |
| Stk39    | Nbeal1   |
| Itp2     | Rpl14    |
| Arhgef9  | Hectd1   |
| Ndufa3   | Cln5     |
| Bcs11    | Fam192a  |
| Inpp1    | Mbd3     |
| Gpc1     | Pin4     |
| Faim2    | Rgs19    |
| Ptp4a2   | Tial1    |
| Stx3     | Csmc2    |
| Atp6v1b2 | Tmem35   |
| Ndufa12  | Eif3m    |
| Lxn      | Tor1a    |
| Anxa5    | Wdr19    |
| Pygm     | Mcmcp    |
| Phb2     | Tnrc6c   |
| Gria3    | Krt8     |

|          |               |
|----------|---------------|
| Usp24    | Rchy1         |
| Psm5     | RBM8;Rbm8a    |
| Ipo9     | Atp6v0d2      |
| Bsdc1    | Rbm12;Gm28036 |
| Iars2    | Rbm5          |
| Letm1    | Shmt1         |
| Echs1    | Ing3          |
| Slc27a4  | Ksr2          |
| Ppp6r3   | Hexim1        |
| Mcts1    | Fes           |
| Hk1      | Tceal5        |
| Ptprd    | Hmbs          |
| Usp14    | Atp1a4        |
| Cdh13    | Chd8          |
| Lactb    | Mrps28        |
| Scrn3    | Tbc1d10b      |
| Fsd11    | Ppp1r17       |
| Enah     | 6330403A02Rik |
| Syp      | Tmem87a       |
| Homer1   | Ttc8          |
| Bag5     | Adnp2         |
| Ap3s1    | Cars2         |
| Slc25a40 | Smpd1         |
| Cbr1     | Robo1         |
| Actr1b   | Matn4         |
| Cotl1    | Peak1         |
| Ctsb     | Rpl7l1        |
|          | Irak1         |
|          | Champ1        |
|          | Fbxo6         |
|          | Nras          |
|          | Plxdc1        |
|          | Stk38         |
|          | Tjp2          |
|          | Trpc4         |
|          | Ube2b         |
|          | Ccdc132       |
|          | Rbbp4         |
|          | Cand2         |
|          | Rundc3b       |
|          | Dnajb5        |
|          | Polr2f        |
|          | Nicn1         |

Gfra1  
Pom121  
Dok1  
Erf  
Prpf19  
Ifi205b  
Ints3  
Hnrnpk;Gm7964  
Tnks  
Vars2  
Nos1ap  
Abcc5  
Rgl3  
Wdr59  
Coprs  
Erlec1  
Tapt1  
Bcl11b  
Pcyt1b  
Nup93  
Mark4  
Sik2  
Thbs1  
Stat6  
Ascc1  
Cox7a1  
Flcn  
Cdc40  
Fam114a1  
Eif1a;Gm8300;Gm2016;Gm21936;Gm  
2035  
Fam210b  
Zbtb43  
Gskip  
Tle4  
Narfl  
Rsu1  
Gcsh  
Coa6  
Dnajc17  
Lsp1  
Slc9a9  
Tpm3-rs7  
Dync2h1

Zdhhc13  
Col4a3bp  
Hopx  
Ap4b1  
Bag4  
Noc4l  
Wdr45b  
Nucks1  
Itgb4  
Rbl2  
Amacr  
Dcaf6  
Arhgef33  
Pja1  
Scrn2  
Rasa4  
Ifit3  
Serp7  
Cbx1  
Ddr1  
Rcvtb2  
Dph1  
Arid4a  
Large  
Tbc1d15  
Tns1  
Fkbp1b  
Htra1  
Kank2  
Kxd1;Uba52  
Acad11  
Rbfox2  
Serpib9b  
Cd151  
Zwilch  
Spin1  
Rps15a  
Snrnp200  
Zfp407  
Dus31  
Usp19  
Suox  
Mrps10

Eif2b1  
Arhgef28  
Frs2  
Mapk9  
Eomes  
Cep250  
Ncf4  
Ctsl  
Ipo11  
Dock8  
Minpp1  
Ccdc124  
Cycs;Gm10108  
Hdac5  
Fabp7  
Lym5  
Npr13  
Osbpl5  
Bin2  
Cpox  
Yeats2  
Synpo2  
Spp1  
Akap13  
Sbf2  
Scgn  
Cntn6  
Serpina1e  
Inpp5d  
Ednrb  
Enpp1  
Ranbp10  
Commd6  
Apba2  
Snrpb2  
Pdzn3  
Nup85  
Ttc27  
Hbbt1;Hbb-bs  
Trim33  
Fam175b  
Sf3b6  
Lamb2

Rb1cc1  
Cog6  
Amigo1  
Dido1  
Tsnax  
Kdm5c  
Mrps18a  
Rabac1  
Cfh  
Ada  
Cdk15  
Cox8a  
Snf8  
Mrps18c  
Rpl35a  
Ddx46  
Mrpl47  
Mia3  
Syncrip  
Slc7a7  
Nfya  
Psme4  
Swi5  
Fabp4  
Rasip1  
Sox5  
Abcf2  
Mib1  
B3gnt1  
Esam  
Ranbp3  
Csnk1g1  
Wwp1  
Optn  
Irs2  
Stim2  
Mb21d2  
Ano10  
Clstn1  
Polr1a  
Tubgcp3  
Rbm8a  
Mnat1

Hm13;H13

Ankrd11

Smarcal1

Akap11

Afp

Psmg4

Ctsc

Pcdhga9

Elov14

Dpy19l3

C330007P06Rik

Ngly1

Mtif3

Pank2

Thada

Dbi

Nifk

Scfd2

Atp5f1

Ephb1

Lrrfip1

Pcdhb1

Hook3

Rem2

9230110C19Rik

Ano8

Ddx18

Cd99l2

Ldhd

Higd1a

Usp25

D6Wsu163e

Gemin2

Ppwd1

Slc29a2

Rps15

Arhgef38

Cep41

Seh1l

Spryd3

Lsm5

Fau

Try10

Ptprc  
Nars  
Vamp4  
Pcdhb20  
Cdk5r1  
Etnk1  
Chtf8  
Klhl42  
Sbno1  
Eif4enif1  
Snx10  
Iars  
Cdc73  
Pkig  
Vps9d1  
Slc25a17  
Trim47  
Pomgnt1  
Tmem209  
Plrg1  
Mterf2  
Cog1  
Mrps36  
Kdm3b  
Abtb2  
Fstl1  
Parp9  
Palm3  
Hnmt  
Pcbp3  
Rasgrf1  
D17Wsu104e  
Gm9242;Hnrmpa3;Gm6793  
Mrpl2  
Hnrnpl  
Ppcdc  
Ssbp1  
Tomm70a  
Klhl22  
Jph1  
Fdx1  
Tefm  
Nop16



Sympk  
Msmo1  
Snrpd1  
Flywch2  
Lppr3  
Vwa1  
Gtpbp8  
Snx32  
Atp5e  
Znf536  
Tgfbr3  
Psme2

Kiaa1429;1110037F02Rik

Hspa14  
Spred2  
Trmt6  
Sec22a  
Galk2  
Dhdh  
Tbp11  
Golgb1  
Adcy8  
Pded2  
Cdk11b  
Llg12  
Dusp15  
Arl10  
Smarcad1  
Scn3a  
Ica11  
Nanp  
Prex2  
Shc1  
Phf21a  
Agbl4  
Gjb6  
Noc31

4933434E20Rik

Med22  
Plekha1  
Natd1  
Npr2  
Tmem261

Tulp3  
Cdk2ap1  
Lss  
Supt4h1a;Supt4h1b  
Acyp2  
Alg13  
Sin3b  
Timm21  
Nsun6  
Btbd2  
Ftsj3  
Stard7  
Pdgfra  
Ppip5k2  
Srpk1  
Timm17a  
Sqrdl  
Ehbp1  
Inpp5k  
Mapkapk5  
Gopc  
Rspry1  
Pnck  
Epcam  
Rps18;Gm10260  
Ndst1  
Bbs4  
Cpsf4  
Bysl  
Acss1  
Parp14  
D1Ert622e  
Cpa3  
Scoc  
Rasd2  
Klk6  
Ttc13  
Epn3  
Rnf25  
Xrcc5  
Oasl2  
Mtss1l  
Dennd4c

Map2k3  
Sme5  
Usp38  
Coro2a  
Slc12a4  
Pld2  
Gng13  
Ptma  
Armex3  
Rbks  
Gtde1  
Tars  
Gipc2  
Bag2  
Lgals9  
Fmod  
Nfatc1  
Anp32e  
Adrm1;Gm9774  
Slc43a2  
Ptrf  
Mbnl2  
Pfas  
08-Sep  
Cdkal1  
Prmt9;Prmt10  
Glcc1  
Gtf2i  
Ces1c  
mt-Nd4;Mtnd4  
Usf1  
Smarb1  
Ankrd50  
Abcc3  
Hm13  
Rnaseh2a  
Faap100  
Adam8  
Abcc8  
Mapk8ip2  
Xylb  
Fam98c  
Itga3

Gcc1  
Jmjd6  
Homer2  
Mrps25  
Dennd2a  
Puf60  
Wdr46  
Fam65a  
Ercc3  
Hdgfrp3  
Prps111  
Abhd17c  
Gga2  
Emc7  
Sf3a3  
Dgkd  
Heatr1  
Faf1  
Fermt3  
Hnrnpab  
Abi3  
Inpp5f  
Tbc1d5  
G3bp2  
Pcm1  
Mical1  
Bcl9  
Ston1  
Otud4  
Aim1  
Lzic  
Ablim3  
Shroom3  
Mettl17  
Cd44  
Ncoa5  
Fuca1  
Palld  
Nup160  
Gramd4  
Svip  
Nars2  
Ugdh

Plekhd1  
Pold1  
Atg101  
Hhat1  
Ints9  
Smc4  
Dnajc3  
Smc1a  
Lnp  
Pde4a  
Wnk1  
Fkbp10  
Ifi202  
Ccdc97  
Col6a3  
Ppie  
Rhbdfl  
Trim16  
U2af114  
Rnf126  
Bicd1  
ptplad1  
Sh2b1  
Nol11  
Ppp1r16b  
Mak16  
Gucy1a3  
Uqcrh  
Wdr91  
Peg3  
Pigo  
Rcan2  
Sumo3  
Haghl  
Trim65  
Pnmal2  
Pex6  
Unc5c  
Cdh19  
Msln1  
Arhgef26  
Galnt16  
Fam188b

Tmem259  
Elov11  
Naa30  
Osbp111  
Sun1  
Mfsd4  
Adck4  
Gm20521  
Itga2b  
Neu3  
Tmem181a  
Zfp11  
Cherp  
Wipi2  
Chd11  
Lpin2  
Pdlim7  
Atp5h;Gm10250  
Pex13  
Ubqln4  
Scrg1  
Ppil2  
Shprh  
Brd2  
Ddx55  
Rnaset2  
Ccdc88b  
Srgap1  
Sst  
Habp4  
Klhl25  
Lars  
Fdxr  
Pars2  
Vps37c  
Usp31  
Polg2  
Cops7b  
Ngdn  
2010107G23Rik  
Ssh1  
Casq2  
Ctnbp2nl

Akap81  
Rps29  
Dhps  
Inpp1  
Txndc16  
Nxn  
Seps2  
Krtap6-1;Krtap6-5;Gm10229  
Lage3  
Rbm17  
Myo1e  
Serpinc1  
Heph  
Gn13  
Serpina3k  
Fam96b  
Ubtf  
Abca7  
Lipt2  
Ccdc58  
Phf14  
Tgoln1;Tgoln2  
Hnrnpu  
Igsf3  
Rrm1  
Tgfbr2  
Tp53bp2;Trp53bp2  
Naga  
Myh11  
Ppp2r4  
Ptms  
Trim35  
Pnkp  
Tgfbrap1  
Arhgap5  
Usp53  
Tomm5  
Sugp1  
Ythdf2  
Krt76  
Gbp5  
Slirp  
Serpib2

Dcxr  
Ssrp1  
Bloc1s3  
Usf2  
Ppp1r3d  
Bms1  
Crlf3  
Dpp4  
Nckap11  
Itih4  
Unc45a  
Rnf31  
Pan3  
Nol6  
Srsf4  
Ms4a15  
Mkln1  
Lrrk2  
Grip2  
Cdc16  
Sfswap  
Tmed5  
Bri3bp  
Def6  
Dolpp1  
Wbp4  
Lrrc41  
Mtmr6  
Usp48  
Chst14  
Clec4a1  
Ccsap  
Vprbp  
Nek4  
Lrrc14  
Fuom  
Vcpkmt  
Ubap2  
Cav2  
Grsf1  
Nt5c1a  
Ttc9c  
Rin2



Rab7b;5430435G22Rik

Gkap1

Dr1

Ube2i

Mtnr10

Sorbs3

Srrm1

Cd3eap

Mettl13

Prosc

Scaf11

Sptlc2

Rybp

Bbs9

Wdr33

Pcdh1

Mon1b

Alg11

Apobr

Here3

Cept1

Gm20390;Nme2

St5

Acta2;Actg2

Stk11ip

Gdpd2

Psd4

Fcrls

Npm1;Gm5611

Mcm3

Max

Grm4

Slc41a3

Glx2

Lsg1

Acsl4

Utp20

Myo1b

Dctn6

Fads1

Ggh

Arl6

Spon1

Rnaseh2c  
Lgi3  
Ddx52  
Gbp7  
Tprg11;Tprgl  
Ralgapb  
Tmed8  
Snrpb;Snrpn  
Pcdh8  
Snx24  
Ppp4r2  
Uri1  
Scn7a  
Kcnj2  
Cnot4  
Mlip  
Utrn  
Serpib1b  
Rbm22  
Hscb  
Pnpt1  
Dzank1  
Cerk  
Tomm6  
Pole3  
Snrk  
Fam81a  
Riok3  
Arl5a  
Vangl2  
Dock11  
Meis1  
Adal  
Ppp1r37  
Zc3h12b  
Tceal3  
Cfbf  
Fkbp9  
Cstb  
Ccp110  
Tfcp2  
Tmcc1  
Selt

Atad5  
Glyr1  
Sh3d19  
Fnbp4  
Xxylt1  
Ppp1r14b  
Brd9  
Nsa2  
Moap1  
Rpp14  
Cx3cr1  
Ptd1  
Dag1  
Pnk1  
Ppig  
Nedd8  
Fam49b  
Rnaseh2b  
Rragb  
Pcdhgb6  
Wdfy1  
Acox2  
Smyd2  
Eif3h  
Med14  
Tmem106b  
Cggbp1  
Ssr3  
Fbp1  
Szrd1  
Bcas1  
Serp1b8  
Aif1  
Nudcd3  
Cnpy2  
Lztf1  
Ep300  
Lrrc59  
Srsf9  
Hapln4  
Prdx4  
Cpeb4

Atf7;Gm28047

Hlcs  
Tns3  
Gatsl2  
Ldb3  
Tmtc4  
Trim67  
Sfr1  
Nexn  
Rfc4  
Jakmip1  
Mdm1  
Cpsf31  
H2-Q10  
Lphn2  
Plekhb2  
Cartpt  
Slc31a1  
C2cd2  
Tnks1bp1  
Rab34  
Creld2  
Xylt2  
Sdk1  
Sh2b2  
Arrb2  
Mt1  
Dhrs11  
Lars2  
Atrn  
Prom1  
Snx18  
Rps8  
Rcc2  
Rdh10  
Upf2  
Dhrs13  
Stag2  
Sdf4  
Ccdc32  
Gne  
Fa2h  
Exosc10  
Prph

Spred1  
Mtpap  
Nr2c2  
Lemd3  
Dimt1  
Kcna5  
Gars  
Phf10  
Nab2  
Znf423;Zfp423  
Sipa13  
Tab3  
Fkbp15  
Smc6  
Herpud2  
Cmas  
Scaf1  
Npl  
Cenpv  
Banf1  
Raly1  
Trpc4ap  
Rapgef11  
Ilf3  
Reln  
Prkci  
Camk2n1  
Lpcat3  
Rpl26  
Gpc6  
Smad4  
Rer1  
Nmd3  
Papss2  
Usp30  
Slc15a2  
Gas2l1  
Gng11  
Cyhr1  
Msrb2  
Trappc21  
Mtmr3  
mt-Nd2;Mtnd2

Tnk2  
Rb1  
Cdk1  
Ncaph  
Decr2  
Ube2g1  
Stk32a  
Wrb  
Fastkd2  
Nsun2  
Cope  
Naa38  
Anp32b  
Tuba1b  
Fam76a  
Emc8  
FAM120A  
Jak2  
Arsa  
Ghitm  
Strip1  
Mtg1  
Sms  
Dhx37  
Bmp2k  
Uros  
Elavl2  
Taf6  
Eif4g3  
Opcml  
Pet100  
P4ha1  
Rnps1;Gm9825  
Phyh  
Rps19  
Pmm2  
Srrm2  
Nfate2  
Ankib1  
Tjap1  
Itfg2  
Kiaa1549;D630045J12Rik  
Evi2a

Rbpj  
Rnf20  
Avil  
Oasl1  
Dusp12  
Srp19  
Klhl6  
Thoc2  
Gm2a  
Ece1  
Ighg2c  
Pdcl3  
Fcgrt  
Nup153  
Nfyc  
Bmi1  
Usp12  
Commd1;Gm28048  
Anapc4  
Lamc1  
07-Sep  
Kiaa1432;C030046E11Rik  
Wdr41  
Arsg  
Psmb10  
Dnmt1  
Fbln5  
Gpalpp1  
Smg8  
Smarca1  
Jph3  
Kiaa0020  
Ath11  
Atp10d  
Syk  
Trmt11  
Ss18l1  
Traf7  
Sos1  
Dcp1b  
Slitrk1  
Pon3  
Nudt19

Zcchc6  
Gstt3  
Mllt4  
Atp11a  
Vezf1  
Itga1  
Phkb  
Chmp7  
Tmem205  
Ccar2  
Fam185a  
Olig1  
Parp12  
Tmem246  
Tnfaip813  
Nup205  
Wwc2  
Dnaaf3  
Mtr  
Sdsl  
Vil1  
Csdc2  
Dnajb14  
Pard3b  
Cldn10  
Plcd3  
Trim23  
Mrpl13  
Cnn3  
Crte3  
Ccde23  
Luzp1  
Phospho2  
Msr1  
Maged1  
Mtd5;mt-Nd5  
Fip111  
Myef2  
Brap  
Osbp17  
Sf3b4  
Odf2  
Casp6



Adcy1  
Ift80  
Rhof  
Tmem56  
Agps  
Pds5b  
Rnf130  
B4galt3  
Cda  
Napepld  
Fyttl1  
Fryl  
Kat7  
Tlde1  
Entpd6  
Nhp2  
Phactr4  
Smim8  
Fam219a  
Exosc5  
Med25  
Ighg1  
Polr3b  
Pde6d  
Fam98b  
Mvk  
Mapk8ip1  
Clpx  
Uhrf1  
Ddx25  
Parp4  
Pkp3  
Slc25a16  
Asfla  
Iah1  
Arl6ip4  
Tnpo2  
Ccde90b  
Sall2  
Larp1  
Fap  
Ly75  
Polr1c

Lrrc40  
Sdc3  
Plat  
Rpl9  
Prpf38b  
Rps17  
Amt  
Fibcd1  
Paox  
Aatf  
Rere  
Sod3  
Zscan21  
Metap2  
Mul1  
Pfkfb2  
Ttl  
Ube2d1  
Suz12  
Cluh  
Ftsj1  
Yrdc  
Gpr124  
Asic4  
Aimp2  
Noa1  
Naa25  
S100a6  
Cald1  
Tmfl  
Panx1  
Nrbp1  
Ubr1  
Emc10  
Ica;1300017J02Rik  
Pgm5  
Rps20  
Tfg  
Nup62  
Ca10;Car10  
Psmg1  
Eif2b3  
Amdhd1

Ptgis  
Lsm3  
Clmn  
Fn1  
Mex3a  
Golp3  
Rusc2  
Polr3d  
Rabl3  
Creb1  
Ulk3  
Cyb5d2  
Nfkb1  
Dvl2  
Copg1  
Ptgr2  
Slc26a2  
2810428I15Rik  
Zfp651  
Cd109  
Mecp2  
Rpl36  
Kctd12b  
Nop2  
Ipo8  
Npep11  
Ptpn4  
Zdhhc20  
Carkd  
Gpr162  
Lman1  
Sf3b1  
Zfp759  
Cdkn1b  
Smap;1110004F10Rik  
Sgpl1  
Mcm2  
Dnaje10  
Kiaa2013  
Mgat1  
Arl2bp  
Terf2  
Trim36

Tgfb2  
Rbm42  
Celsr3  
Elof1  
Ncoa3  
Cul4b  
Wasf2  
Thoc6  
Rtn4rl1  
Tecpr2  
Bai2  
Carhsp1  
Nfrkb  
Tdrd7  
Rsrc2  
Esys2  
Secisbp2  
Zbtb21  
Lztr1  
Mrpl9  
Ip6k1  
Nhlrc2  
Cmip  
Stxbp4  
Pkib  
Gsdmde1  
Fcgr1  
D17h6s53e  
Ifit1  
Lamb1  
Pvr12  
Rpa3  
Caskin2  
Mrps18b  
Hspb8  
Pja2  
Kctd14  
B3galnt1  
Ptprt  
Toe1  
Mrps34  
Hdac6  
Afap1

Cd34  
Itch  
Ppp2r2d  
Wdr70  
Baz1b  
Tbc1d13  
Ankmy2  
Ifitm3  
Fbxo21  
Pcid2  
Tbxas1  
Bub3  
Umps  
Rsph9  
Tnfaip8l2  
Ankle2  
Cdh15  
Hist1h4a  
Rpl10a  
Rwdd4;Rwdd4a  
Rbbp7  
Rgl2  
Foxg1  
Qtrtd1  
Bud31  
Mrc1  
Pofut1  
Cd180  
Spock1  
Dap  
Ift140  
Bbs2  
Alkbh3  
Lrfr1  
Abcd1  
Ndufaf6  
Josd2  
Tacc2  
Pfdn5  
Rps27  
Slc7a6os  
Tbc1d16  
Utp14a

Zdhhc17  
Dicer1  
Gh1  
Ptpm  
Chm  
Lyplal1  
Zmat2  
Srpr  
Ptpn12  
Atxn2l  
Serpinf1  
Zc3h13  
Atr  
Magee2  
P33monox;4833439L19Rik  
Ca3  
Tgm2  
Polr2e  
Cirh1a  
Hmg20a  
Pomk  
Spcs1  
Heatr2  
Zfyve20  
Gm561  
Slc7a11  
Tusc5  
Ift172  
Anpep  
Tor4a  
Arap1  
Slc25a35  
Chid1  
Frmd7  
Ephb2  
S100b  
Mov10  
Chd7  
Nat2  
Man1a1  
Nubp2  
Matn2  
Sema3c

Shc3  
Snrnp70  
Oas1a  
Dck  
Serinc3  
Mthfd2  
Strada  
Commd10  
Mea1  
Erh  
Dazap1  
Zmynd8  
Gnpda2  
Lamtor4  
Ap5b1  
Fam57b  
Snrpc  
Mrpl24  
Snrnp27  
Nrip3  
Ext2  
Fhit  
Eif3j1;Eif3j2  
Igf1r  
Cdk9  
Pik3cg  
Arhgef40  
Nprl2  
Kbtbd3  
Adarb1  
Col3a1  
Fcho2  
Rpl17  
Map4k3  
Trit1  
Ing1  
Gm3839  
Adssl1  
Ablim1  
Mrpl32  
Chn2  
Chchd1  
Srsf7

Ppp2r5d  
Dok4  
Polr2d  
Dera  
Maneal  
Tpgs1  
Pld4  
Fbxl15  
Sgk2  
Myg1  
Rbm7  
Hist1h1c  
Acad10  
Sgsh  
Ints7  
Rnf114  
Mettl3  
Snx3  
Srsf3;Gm12355  
Phf6  
Arhgap33  
Dzip1;Syce3  
Cpped1  
Txndc9  
Apoa2  
Gpcpd1  
Znf346;Zfp346  
Ccdc115  
Api5  
Elmo3  
Saraf  
Adra2a  
Fndc3b  
Lcat  
Pbx1  
Rbm14  
Cul4a  
Nme4  
Clec2l  
Serpina1d  
Lcp2  
Fam151b  
Trmt2a



Anapc11  
Stard4  
Timm8a1  
Eprs  
Stard10  
mt-Atp6;Mtatp6  
Rpe  
Smim20  
Fam169a  
Ehd2  
Nle1  
Gnl31  
Arfgap2  
Med20  
Arglu1  
Myt1  
Sumo1  
Mbd2  
Dph7  
Pabpc4;Gm10110  
Ube2j1  
Ddx23  
Jmjd1c  
Alkbh5  
Pard6a  
Ahi1  
Mrps11  
Atp5b  
Parvb  
Depdc5  
Alox5  
Kiaa1671  
Ehmt2  
Tssc4  
Tcirg1  
Tnc  
Osbp19  
Fxyd7  
Ube2r2  
Pde8b  
Chmp2b  
Ugt1a7c  
Mx1

Bgn  
Il16  
Commd7  
Ifih1  
Map3k12  
Arid4b  
Prpf3  
Mtif2  
Tmem62  
Lyz2  
Ppcs  
Golga7  
Dfna5  
Znf330  
Lgals1  
Tdp1  
Dpf3  
Vps37a  
Entpd5  
Arpp21  
Raf1  
Spata6  
Pxx  
Zfc3h1  
Vasp  
Rapgef1  
Abl1  
Ccdc39  
Fmn1  
Ncapg2  
Foxp1  
Dis3l2  
Cnpy4  
Plin3  
Cep128  
Gm21992;Rbm4  
Gabpa  
Rbm10  
Birc6  
Fam107b  
Myo1g  
Slc13a5  
Tsta3

Stat2  
Samd9l  
Tha1  
Nmnat1  
Rps12  
Raggef5  
Sdad1  
Fuca2  
Prpf31  
Rnf213  
Sugp2  
Casp8  
Pla2g16  
Rtp1  
Ube4b  
Nudcd1  
Krt33a  
Gm20441  
Eif1  
Znf622  
Tmeff1  
Pctp  
Med28  
Kif21b  
Ssbp3  
Ppil3  
Cnot10  
Ddx58  
Tbc1d9b  
Rprd2  
Tmed2  
Ddx21  
Calm1  
Cdh8  
Tapbp  
Rab36  
Cd48  
Lnpep  
Trub2  
Wdr75  
Kiaa0196  
Alb  
Plekha6

Jam2  
Chchd7  
Ttc17  
Gbp6;Gbp10  
Pde3b  
Xrcc1  
Znf609  
Tcerg1  
Ckap2l  
Eepd1  
Tbc1d7  
Cenpc  
Brox  
Snw1  
Rps7;Gm9493  
Dhx29  
Gfce  
Ppp2r2b  
Srek1  
Dchs1  
Alg9  
Vill  
Kirrel2  
Hspg2  
Gale  
Thbs4  
Slc12a7  
Ambp  
Prcc  
Semp6  
B3gatl  
Tmem260  
Tmem186  
Ccdc94  
Evi5  
Slc20a1  
Ppp1r12c  
Vrk3  
Tmem240  
Fgfr3  
Gbp9  
Azgp1  
Fam171a1

Ufsp1  
Asun  
Raver1  
Rfk  
Bad  
Clip3  
Kcnc3  
Dusp19  
Thns12  
Tmbim6  
Mospd2  
Fgd1  
Rmdn1  
Gar1  
Cd63  
Znf598  
Desi1  
Ldlr  
Kiaa1033  
Znym3  
Sox2  
Nacc1  
Swap70  
Enpp5  
Kctd21  
Rpap3  
Selm  
Polr3e  
Mvb12b  
Nudt13  
Ddx50  
Prorsd1  
Naa40  
Wdr61  
Cnot2  
Tpmt  
Ncf2  
Deptor  
Pecr  
Ass1;Gm5424  
B4galnt1  
Larp4  
Brd7

Herc6  
Skiv2l2  
Ints12  
Man2a1  
Hgh1  
Uck1  
Xpr1  
Mad2l1bp  
Plau  
Dpp8  
Rap2c  
Otud7b  
Ccde9  
Eif2b4  
Traf2  
Lgmn  
Skap2  
Cdk5rap2  
Sgsm3  
Riok1  
Top1  
Fut11  
Herc1  
Sulf2  
Dgat1  
Eif3a  
Fam91a1  
Trappc2  
Ripk1  
Hdac11  
Fubp1  
Atp11c  
Acot8  
Snupn  
Ash2l  
Tbl1x  
Ncor2  
Rab13  
Chrm2  
Cluap1  
Pcx;Pc  
Tf  
Pon1

Znf326;Zfp326

Slit3

Srsf2

Itih5

Ndufaf4

Dped

Timm22

Edc4

Trim25

Cybb

Dennd1a

Tbck

Xpo5

Znf521

Glt1d1

Dnajc28

Hltf

Kctd4

Lmcd1

Rprd1a

Tnxb

Dync2li1

Adh1

Ciao1

Rassf8

Mup2;Mup10

Gnb2l1

Apoa1

Kctd6

Sec14l1

Pdim1

Prox1

Eif1ad

Csnk1d

Xrn1

Gatad2b

Pum2

Pogz

Entpd1

Dab1

Rnase4

Exosc7

Akr1e2;Akr1e1

Tceb3  
Grec10  
Kif3a  
St3gal3  
Prkaa2  
Slain1  
Isoc2a  
Lrch1  
Rpl32  
Adpgk  
Pdcd5  
Smim12  
Palm2;Palm2Akap2  
Rgs18  
Unc93b1  
Hnrnpul2  
Surf6  
Sec61a2  
Plxnb3  
Gdap2  
Naglu  
Sema4c  
Rcan3  
Bbs7  
Fam122a  
Klh15  
Rasgef1a  
Smad2  
Raly  
Tbc1d25  
Pdzd2  
Mef2d  
Ca7;Car7  
Slc30a7  
Hist1h3a  
0610011F06Rik  
Mrpl50  
Evi51  
Ndn12  
Abca1  
Dennd4b  
Col5a1  
Kbtbd7;Zbtbd6



Mrpl21  
Leprel1  
Dpf1  
Mesdc1  
Baiap3  
Hbs11;Gm9923  
2410002F23Rik  
Parn  
Saa3  
Cd1d1;Cd1d2  
Myo16  
Fam126a  
Asna1  
Uap1  
Wdr12  
Ccdc12  
Ei24  
Chpt1  
Rab43  
Elac2  
Arhgef101  
Galnt1  
Nhlrc3  
Osbp2  
Lpcat1  
Urm1  
Fxn  
Cd36  
Mtmr14  
Tmem126b  
Zmynd11  
1700037H04Rik  
Txnrd3  
Sez61  
Slc25a21  
Ddx41  
Gfpt2  
Tmcc3  
Bola1  
Hs2st1  
Fam134a  
Ndufv3  
Gorasp2

Rsb1  
Mpeg1  
Antxr1  
Csk  
Pter  
Barhl2  
Stxbp2  
Klhdc8b  
Cyth2  
Rps23  
Elp2  
Ppat  
Mrps21  
Gng4  
Col4a1  
05-Sep  
Gtf2a1  
Cpsf7  
Khk  
Zc3h7b  
Acbd7  
Wdr43  
Fam160b1  
Ubl4a  
Cdk13  
Rnf13  
Ttc21a  
Celf3  
Baz2a  
Rfc1  
Rps10  
Gm10094;Sap18  
Ankrd28  
Dctpp1  
Ppp4r4  
Nat14  
Cox7c  
Spg20  
Zpr1  
Htatsf1  
Stx17  
Ttc33  
Usp8

Rsl1d1  
Cwc15  
Sema4a  
Flnc  
Etv6  
Pald1  
Nmnat2  
Hist1h1b  
Uvrag  
Igfbp7  
Nelfb  
Ints10  
Nde1  
Foxk2  
Commd5  
Osgep  
Klhdc10  
Map3k4  
Pdzd11  
Igsf9b  
Abca8b  
Exoc1  
Fbxl14  
Fchsd2  
Tubal3  
Btaf1  
Prr7  
Dguok  
Wbscr16  
Med6  
Rasal2  
Bcl10  
Mrpl49  
Dgkg  
Celf6  
Usp1  
Nudt16l1  
Set  
Cyp51a1  
Zmat4  
Cbx8  
Top2a  
Znf706

Arhgef10  
A830010M20Rik;Kiaa1107  
Chi3  
Ano3  
Ivns1abp  
Ppfibp2  
Sepsecs  
Rasgrp1  
Terf2ip  
Zc3h15  
Heatr5a  
Ccdc53  
Pak7  
Galns  
Ptrh1  
Hdac8  
Usp28  
Fmn2  
Actl6a  
Rps25  
St18  
Nup98  
Pex11b  
Ctnnbip1  
Znf385b;Zfp385b  
Cblb  
Cdc3711  
Ncoa1  
Lsm14a  
Mdn1  
Nub1  
Epha6  
Pdlim3  
Dnttip1  
Nfib  
Rbbp5  
Aif11  
Trhde  
Ulk2  
Sirt7  
Slc39a7  
Wdr5  
Rbm12b2

Khdrbs2  
Ugcg  
Necap2  
Sart1  
Slit1  
Cdh23  
Dach1  
Sely  
Pspc1  
Nmt2  
Bag1  
Klh13  
Vav3  
Blnk  
Trim27  
Znfx1  
Tubgcp6  
Arhgap18  
Gtpbp4  
Arhgap25  
Cp  
Cdh20  
Btf3l4  
Mios  
Ogn  
Tcf20  
Lsm1  
Rad50  
Sez6  
Tceb1  
Sgms1  
Hist1h1e  
Timp2  
Txndc12  
Ankrd17  
Marcks1l  
Atp2c1  
S100a8  
Mtrf1l  
Ubr2  
Larp6  
Clmp  
Rdh13

Pdzd4  
Secisbp21  
Chtop  
Zbtb8os  
Gnpat  
Otulin  
Slc33a1  
Mrpl30  
Clstn2  
Tprn  
Sub1  
Gm20671;Pisd  
Yeats4  
Ighg2b;Igh-3  
S100a1  
06-Mar  
Mrpl40  
Etnppl  
Mex3c  
Nme7  
Mphosph10  
Slc7a3  
Ikkkb  
Gmeb2  
Usp10  
Tmem263  
Plekhg5  
Rnf123  
Ubp21  
Cnnm3  
Rplp1  
Agpat6  
Sobp  
Rpl38  
B3gat3  
Mapk4  
Rnf181  
Csrp2  
Nbas  
Ptk7  
Brinp2  
Rnf219  
Ikkkap

Surf4  
Cds1  
Rpa1  
Iqgap1  
Lzts2  
Serping1  
Fam120c  
Vash1  
Alkbh7  
Golga5  
Igf2bp2  
Wipf2  
Gpld1  
Dhx35  
Pelo  
Aifm2  
Smoc1  
Prim2  
Lrsam1  
Chgb  
F8a;F8a1  
Ift74  
Ltn1  
Dnajc25  
Wsb2  
Dnajc19  
Hcls1  
Lrrc1  
Xpot  
Comt  
Hexa  
Unc119b  
Gys1  
Dffa  
Nasp  
Dapk1  
Elp4  
Nadk  
Smardc2  
R3hdm1  
Apbb2  
Mb  
Cbwd1

Hps6  
Nxph1  
Adss  
Rimkla  
Rbmx  
Hapln2  
D10Jhu81e  
Rab33a  
Sae1  
Tceal1  
Tufm;Gm9755  
Acvr1  
Pnpo  
Ptdss1  
Nhs11  
H2afv;H2afz  
Emp2  
Fam65b  
Fhod1  
Lmf1  
Kynu  
Ptpdc1  
Snrnp40  
Chml  
Oxsm  
Sh2d3c  
Pgpep1  
Sap30bp  
Rims4  
Xpnpep3  
Fga  
Lgals3bp  
Trp53i11  
Hirip3  
H2afx  
Ndor1  
Cmtr1  
Gtf2f1  
Cars  
G3bp1  
Rbms1  
Entpd3  
Ptbp1



Pelp1  
Dyrk1a  
Zdhhc6  
Apip  
Enox2  
Pak4  
Adamts5  
Nes  
Kdelc2  
Dnmbp  
Slc22a17  
Sel1l3  
Kif13b  
Trabd  
Rasa3  
Thumpd1  
Fgb  
Satb1  
Siae  
Gla1  
Omp  
Zfp532;Znf532  
R3hcc1  
Irak4  
Syne2  
Pias1  
Efnb1  
Mars2  
Ttr  
Bzw2  
Map4k5  
Cdk7  
Phactr2  
Inpp4b  
Ankzf1  
Hnrpa1  
Efcab14  
Adipoq  
Actr6  
Cog2  
Tbc1d9  
Wdr55  
Sec63

Tbc1d22b  
Sh3bgrl2  
Sssca1  
Cd1d1  
Scg2  
Ngp  
Fbxo44  
Kiaa1045  
Tma7  
Gab2  
Vimp  
Hivep2  
Lpin1  
Ddhd1  
Pcsk1  
Cpq  
Ttc3  
Apod  
Kiaa1598  
Ccde141  
Pecam1  
Med16  
Chd1  
Bmpr1a  
Lcmt1  
Dgcr8  
Sspl2a  
Mrpl22  
Mif4gd  
Scaf8  
Pcnx13  
Cenh  
Tes  
Cck  
Naprt  
Hspb6  
Polr2l;Gm10774  
Ctc1  
Mapk11  
Pus10  
Cdk5r2  
Exoc6  
Apoa4

Polr2k  
Pde12  
Ccdc28a  
Sgpp1  
Itsn2  
Nup155  
Romo1  
Ubxn2b  
Polr2b  
Yipf4  
Agt  
Slc39a10  
Rpl19  
Mut  
Pcsk1n  
Prrc2a  
Fam120b  
Copa  
Npdc1  
Gpr37  
Lrch4  
Pdp2  
Sra1  
Ptplb  
Tmem19  
Rif1  
Iap  
Plcb3  
Nfx1  
Nav3  
Celf1  
Bap18;0610010K14Rik  
Lpxn  
Mbnl1  
Ppfibp1  
Abcd4  
Atad2b  
Cabp1  
Parp1  
Edf1  
Acin1  
Atp5j  
Myrip

Ndufa1  
Ubxn4  
Rnd2  
Kpna1  
Rab1  
Gm20604;Gm28051;AK010878  
Mrto4  
Trmt10a  
Fam45a  
Aftph  
Abhd17b  
Hba-a2;Hba  
Ndufc1  
Gpr17  
Setd3  
Bnip2  
Ca13  
Ebf3  
Qrich1  
Dcn  
Mrpl57  
Mrps30  
Ercc4  
Dis3  
Nrp1  
Mblac1  
Urod  
Egfr  
Emc4  
Mtmr12  
Rpia  
Ahctf1  
C1qa  
Vwa9  
Garem  
Atp5d  
Fam195b  
Rpl13a  
Akap1  
Cog5  
Ppp1r2  
Glrb  
Ppp1r11

L7rn6;l7Rn6

Prpf38a

Gtf2b

03-Sep

Ythdc1

Mrgbp

Exosc1

Nptx2

Hs1bp3

Itpk1

Lrrc8d

Ganc

Flrt1

Hdgfrp2

Slc25a31

Hmbox1

Nmi

Eif3c

Clec16a

Cbln2

Nr2c2ap

Rbms2

Itga6

Slc30a5

Snx15

Serf2;Serf1

Gatad1

Ctsf

Ppapdc1a

Ilkap

Gng10;Gm20503

Akap8

Engase

Fez2

Rbm33

Pou3f3

Scpep1

Trip4

Dbr1

Hddc2

Ppp1r9a

Neurod1

Sephs1

Mrrf  
Ptpn6  
Hn1l  
Cemip  
Hmgcs1  
Opalin  
Sirt4  
Bptf  
Ifggb5  
Gdpgp1  
Sf3a2  
Acss2  
Rtn4rl2  
Jph4  
Tmem132b  
Pla2g7  
Serpini1  
Gbp1  
Cstf2t  
Vezt  
Srp14  
Cant1  
Geat  
Adprm  
Pdim2  
Pcgf2  
Col6a1  
Uba2  
Eogt  
Rimklb  
Braf  
Arvcf  
Pik3r5  
Tada1  
Tpst1  
Cdr2l  
Kif3c  
Ctgf  
Zic1  
Ttc37  
Reep3  
Mrpl14  
Map2k5

Glb1  
Cdh6  
Sec24b  
Fos  
Fbn1  
Hmger  
St3gal5  
Mkrm2  
Dak  
Ift22  
Col12a1  
Megf8  
Fhl3  
Tbl3  
Gpatch11  
Pkn1  
Adcy7  
Sh3bgrl  
Arhgap24  
Ybx1  
Matk  
St8sia3  
Eif4g2  
Dnajc27  
Kdm2b  
Ubl5;Gm16381  
Atp2b3  
Ufm1  
Rasal3  
Irf3  
Mertk  
Parp3  
Sema4d  
Ahdc1  
Stam2  
9030617O03Rik  
Atxn1  
Dusp23  
As3mt  
Rps6kb1  
Brk1  
Tll1  
Kiaa0319l;AU040320

Homer3  
Gas2  
Smdt1  
Prpf40b  
Scamp2  
Ogfod1  
Phldb2  
Rps2;Gm5786;Gm18025;Gm6576;Gm8225  
Bloc1s2  
Tmed4  
Edem3  
Ergic2  
Ccser2  
Chmp1b1  
Ormdl3  
Ripk2  
Sacs  
Unk  
Lonrf2  
Sypl1;Sypl  
Maf1  
Smek1  
Ctsa  
Mettl16  
Crhbp  
Pcbp4  
Ppp1r14c  
Xrcc6  
C2cd4c2CD4 family  
Myo1f  
Casp1  
Tm9sf4  
Ncl  
Sde2  
Rps14  
Pomp  
Tinagl1  
Col18a1  
Sipa1  
Rsf1  
Lrp8  
Rnf7;Gm7075  
Elp3



Fam73a  
F2  
Itgax  
Sptbn4  
Tpp1  
Uxt  
Rpp25l  
Atg2a  
Ppp1r16a  
Hmha1  
Atrx  
Atg4b  
Atp5g2;Atp5g3  
Gucy1b3  
Tpk1  
Atl3  
Gprasp1  
Patz1  
Herc4  
Hn1  
Ilvbl  
S1pr5  
Pdpf  
Ppip5k1  
Cnot8  
Raver2  
Rrm2  
Amer2  
Agl  
Dcakd  
Ythdf1  
Fbxo42  
A2m;Pzp  
Gbp2  
Zkscan3  
Prps1;Prps113  
Tcf25  
Plcd4  
Nacad  
Em11  
Alpl  
Pmch  
Ccadc88a

Tmppe  
Tarbp2  
Ube2a  
Cebpz  
4931406P16Rik  
Paxbp1  
Pwp2  
Ssh2  
Farsb  
Cbx5  
Snn  
N6amt2  
Ube3c  
Ddx56  
Tsc22d4  
Eef1e1  
Nipbl  
Cnn1  
Ccdc85a  
Iigp1  
Fgd2  
Wbp11  
Fam63a  
Kcnj6  
Gfer  
Clcc1  
Cdc5l  
Zbtb7a  
Ecsit  
Yars  
MacroD2  
Camsap2  
Gns  
Amot1l  
Gpaa1  
Tle1  
Heg1  
Cwc22  
Elfn1  
Kdm4b  
Scg3  
Ap4e1  
Tprkb

Phlpp2  
Was  
Gabpb1  
Yif1b  
Lppr4  
Smg1  
Slc27a1  
Atp6v0c  
Mtdh  
Gamt  
Sdhaf2  
Arpc1b  
Mepce  
Zc3h7a  
Cdk5rap3  
Bace1  
Pnpla7  
Gpr56  
Ift27  
Naf1  
Tspan2  
Prmt3  
Arhgef25  
Amot  
Trip10  
Fastkd5  
Cdk4  
Golga3  
Grid2  
Tgfb1  
Ttc39b  
Tmem165  
Palmd  
Casp7  
Rab28  
Fgd4  
Gid4  
Hdac1;Gm10093  
Tap1  
Ap4m1  
Asphd1  
Eif4e3  
Gmip

Chga  
Abce1  
Fut9  
Chd4  
Kiaa1161  
Trappc1  
Ptp3  
Hmgb2  
Tub  
Slc35b2  
Bai1  
Ddx6  
Abcc4  
Megf10  
Fbxo7  
Papss1  
Polr2j  
Galt  
Lipa  
Phf1  
Capg  
Eftud1  
Snap23  
Emilin1  
Ndc1  
Slc4a1ap  
Cnksr3  
Fat2  
Ttc5  
Sh3bp1  
Tmcc2  
Bche  
Galm  
Trappc8  
Kidins220  
Renbp  
Ephb6  
Mob2  
Nyap2  
Zfpm2  
Micu2  
Naa35  
Sytl2

Mrpl19  
Abca2  
Chd9  
Kiaa1841;0610010F05Rik  
C4b  
Ntan1  
Zfyve27  
Mocs2  
Clns1a  
Cxxc1  
Mcc  
Tbc1d19  
Tra2a  
Lrrc25  
Sp9  
Krt85  
Med1  
Slc38a2  
Tnfaip2  
Cdc23  
Cers1  
Pi4kb  
Tubgcp4  
Cdan1  
Gtf2h2  
Dhx30  
Pank3  
Ddx39b  
Cacul1  
Gtf3c4  
Efnb2  
Snrpf  
Hkdc1  
Lphn3  
06-Sep  
P2rx4  
Rbck1  
Ddx27  
Sf3b5  
Cxx1c  
Il1rap  
Kcnip1

Rpl29;Gm17669;Gm10709;Gm3550

Zfand5  
Dapk3  
Ctso  
Igf2bp1  
Samd14  
Ptpn21  
4930402H24Rik  
Gabarap  
Cfi  
Serpind1  
Atpif1  
Vps13d  
Plekho2  
Ccdc186  
Fam115a  
Ccnk  
Rnf113a2  
Arg2  
Msi1  
Atf7ip  
Tyms  
Manf  
Srd5a3  
Slain2  
Cmc1  
Lemd2  
Rpl7a  
Nup11  
Nfx11  
Tmem178b  
Plek  
Fkbp5  
Upp1  
Hars  
Ctbs  
Otud7a  
Ankrd13d  
Dhx33  
Col14a1  
Podx12  
Micall2  
Tbc1d2b  
Smug1

Gmfg  
Med13  
Nova2  
Slfn9  
Zeb1  
Eif2d  
Nop14  
Pkd2  
Pus1  
Clip4  
Dars  
Erb2ip  
Hectd3  
Cyp2d22  
Coq4  
Cst3  
Sfpq  
Mid1ip1  
Med11  
Usp47  
Trp53bp1  
Bckdhd  
Mycbp  
Larp4b  
Cldnd1;Cldnd25  
Hk3  
Fer  
Aacs  
Mcf2  
Rpl18a  
Frd4b  
Tgs1;Gm5117  
Sarnp  
Nr2f1  
Aamd  
Smpd2  
Tgfb  
Stambp1  
Mrpl16  
No19  
Thumpd3  
Plekhf2  
Klf13

Rnf157  
Ints4  
Clca1  
Lbr  
Mrpl27  
Ppil4  
Rpp30  
Ctr9  
Mrpl3  
Mars  
Cgn1  
Rasa1  
Acy3  
Hist2h2bb;Hist1h2bm  
Dph2  
Txnip  
Zc3h18  
Hspb1  
Chmp3  
Fnta  
Ubr5  
Tmem222  
Kif15  
Agtbp1  
Gna12  
Pik3cb  
Nap115  
Srsf12  
Mast1  
Usp22  
Adam9  
Cry2  
Col4a6  
Atxn2  
Hsd11b1  
Abhd4  
Dock7  
Haus3  
H1fx  
Cnga2  
Snx13  
Mpz  
Aass



Ctu2  
Abcf3  
Scn9a  
Rrp9  
Dtnbp1  
Bid  
Mst4;2610018G03Rik  
Rnpc3  
Syt6  
Lama4  
Magt1  
Phc2  
Nemf  
Ttc28  
Nubpl  
Zfr2  
Rel  
Eefsec  
Fam184a  
Mt3  
H2-K1  
Jmjd7;Gm28042  
Arhgap30  
Atp13a5  
Afap111  
Kti12  
Nop10  
Cacnb2  
Unkl  
Mesdc2  
Lgals8  
Sp110  
Creg1  
Hmgb3;Gm6104  
Xdh  
Hmox1  
Mrps16  
Pdcd1  
Bag3  
Crebbp  
Mfap1  
Ell  
Plbd2

Zfr  
Ptar1  
Rc3h2  
Jakmip2  
Myl6b  
Wibg  
Fbl  
Slc7a6  
Spata5  
Fto  
Wapal  
Alyref  
Kctd10  
Trmt11  
Satb2  
Pak1ip1  
Mrps35  
Mrpl43  
Mpdz  
Tifa  
Lrig1  
Hp1bp3  
Kcnb2  
Ralgps2  
Ago3  
Rilp1  
Nfil3  
Ogfr  
Eif2ak4  
Relb  
Ace  
Bcat2  
Mtss1  
Lrch2  
Kdm4a  
Prrc2c  
Igf2r  
Eef2k  
Wdr74  
Pyroxd2  
Cdkn2aip  
Tusc2

Bola2  
Tbc1d2  
Rrbp1  
Osbp16  
Qki  
Ncbp2  
Fbxo38  
Phyhd1  
Cygb  
Golp31  
Slc37a2  
Nup88  
Smad1  
Mem5  
Serpinh1  
Ppm1g  
Rap1gds1  
Slc16a2  
Arid2  
Msh2  
Adnp  
Pax6  
Pycard  
Kmt2a  
Rbm47  
Itgb3  
Bod1  
Arhgef18  
Nat81  
Bdh2  
Pvr13  
Ptgds  
Ddx49  
Dusp14  
Dhx38  
Alox15  
Asap2  
Fam102a  
Rtn2  
Cbx4  
Rbpms  
Pdlim4  
Klh19

Impa2  
Fam213b  
Dek  
Syt11  
Acot13  
Slc6a15  
Adrbk1  
Tmem223  
Serp8  
Irf2bp2  
Phkg2  
Rpl4  
Nudt7  
Kiaa1467  
Dact3  
Ubxn2a  
Acp2  
Spats2  
Lym4  
Kcnj11  
Dars2  
Sart3  
Slc9a6  
Clgn  
Hdac2  
Pfdn1  
Hnrnp3  
Apoc3  
Gpatch1  
Pitpnm2  
Cstf3  
Ccb12  
Tsc22d2  
Col15a1  
Zfp644  
Ago2  
Appbp2  
Fv1  
Dhx57  
Naip2  
Ca5b  
2700097O09Rik  
Cntn3

Penk  
Gpc3  
Adap2  
Suv420h2  
Lactb2  
Rbm39  
Hecw1  
Fn3krp  
Pkp2  
Tyk2  
Gcc2  
Tram1  
Cdk18  
Esrra  
Inpp5j  
Ppapdc2  
Sin3a  
Bccip  
Nelfcd  
Egln1  
Hdhd2;Ier3ip1;Gm10784  
Ybx3  
Dnlz  
Tor2a  
Ca14  
Rnf41  
Epb42  
Mpv17  
Trappe5  
Mms19  
Abhd14b  
Pdgfrb  
Rpl35;Gm10269  
Amfr  
Hypk  
Odr4  
Stau1  
Bop1  
Akt1  
Rps28  
Cpeb2  
Ccdc85c  
Slc6a5

Hid1  
Tcf4  
Neurod2  
Cpsf3  
Zhx3  
Nt5c2  
Aup1  
Fzd3  
Ltbp4  
Stau2  
Utp15  
Tb11xr1  
Dnajib12  
Rtp2  
Col11a1  
Chchd10  
Seg5  
Sos2  
Rtn4ip1  
Atpaf2  
Tlr13  
Epha7  
Ric8b  
Ewsr1  
Gipc1  
Smurf1  
Maz  
Ntmt1  
Dscr3  
Hspa13  
Focad  
Gulp1  
Exosc3  
Lpp  
Heatr6  
A2mp  
Cirbp  
Rel1  
Mtcl1  
Ssbp2  
Gjc3  
Tiam1  
Sec24d

Crtc1  
Gbp4  
Rps6kc1  
Hook1  
Scaper  
Mre11a  
Rnasel  
Cactin  
Cyp20a1  
Cdh4  
Rasgrf2  
Kctd1  
Dopey2  
Sash3  
Ubac2  
Dnajc30  
Tspan15  
Hnrnpm  
Gpn1  
Xab2  
Cog7  
Triobp  
Myo1d  
Mrps24  
Wrnip1  
Cox19  
Safb  
Emc6  
Timm10b  
Cetn3  
Pex10  
Accs  
Pard3  
Ctps1  
Tmem109  
Abcd2  
Kcnq3  
Ctcf  
Lingo3  
Myo9b  
Ten1  
Parg  
L3hypdh

Rxbp1  
Papola  
Pold2  
Fam69b  
Mthfs1  
Atp5s  
Pgk2  
Wdr26  
Elp5  
Mettl14  
Emr1  
Usp32  
Ncoa6  
Gca  
Orc4  
Lgl1  
Kpna6  
Mapk15  
Mta3  
Sall1  
Npc2  
Pknox2  
Fmo5  
Usp39  
Cobl  
Gng8  
Fbxo11  
Fat4  
Psip1  
Rgs3  
Map2k2  
Tlr3  
Scaf4  
Sec61b  
Coq10a  
Rps4x;Gm15013  
Pikfyve  
Cabin1  
Snx33  
Cwf1911  
Atxn7l3b  
Smg6  
Extl3



Tmpo  
Znf512b  
Kif16b  
Itga4  
Speg  
Snx17  
Ces1d  
C1qc  
Uaca  
Rel2  
Mb21d1  
Fam217b  
Tspan9  
Sun2  
Tstd1  
Rpp25  
Adck3  
Limk2  
Aatk  
Elov15  
Cecr5  
Pstpip2  
Nqo1  
Dok2  
S100a10  
Lrrc16a  
Ints2  
Pex5  
Shb  
Brd3  
Trmt112  
Lrfr2  
Aff4  
Tpgs2  
Dhx16  
Erlin1  
Dock1  
Casc4  
Fgfr1op2  
Ddx54  
Trappc13  
Met  
Dnal1

Ubxn1  
Xiap  
Hsd17b7  
Apaf1  
Ralgapa2  
Snx29  
Slc4a2  
Mtp  
Bloc1s4  
Tti1  
Gvin1  
Spag7  
Dzip3  
Mgrn1  
Uxs1  
Wipi1  
Mrpl55  
Spats21  
Thrap3  
Thg11  
Hvcn1  
Zwint  
Glmn  
Ranbp2  
Ctif  
Ift52  
Ccde25  
Dnajc2  
Smc3  
Inadl  
Pex7  
Manba  
Ercc1  
Rpl2211  
Pde4b  
Pld1  
Dhx15  
Thoc5  
Cnpy3  
Numa1  
Mylk  
Ate1  
Sdcbp

Inpp5e  
Mvd  
Whsc111  
F11r  
Fam188a  
Cr11  
Ddrgk1  
D2hgdh  
Rfx1  
Ifi203  
Arhgap4  
ApoH  
Wash1  
Emg1  
Hap1  
Rab26  
Pign  
Rps21  
Unc5b  
Wars2  
Slitrk3  
Ndufb2  
Dnase2;Dnase2a  
Preb  
Igkc  
Arhgap22  
Fam129a  
Hnrnpd  
Uqcc2  
Sec16a  
Arid1b  
Map7d2  
Eif4ebp1  
Ldlrap1  
Aoc3  
Grip1  
Srsf5  
Usp4  
Lgi4  
Anln  
Colec12  
Znf385a  
Sox6

Yme111  
Tmlhe  
Tradd  
Nol7  
No66  
Exd2  
Farsa  
Irs1  
Tlr7  
Mtmr7  
Ctdp1  
Luc7l  
Dennd5a  
Elf2  
Gtf2e1  
Cav1  
Rps3a  
Cnbp  
Ubap1  
Ngb  
Ublcp1  
Msl1  
Eny2  
Casq1  
Fgfr1op  
Lurap1l  
Pigg  
Ppp1r14a  
Casp3  
Ppp3cc  
Gpmb  
Ube2h  
Keap1  
Pde9a  
Use1  
Phlpp1  
Kbp;2510003E04Rik  
Dut  
Capn7  
Cnot6  
Here2  
BC024978  
Slc7a1

Ptpn2  
Sparc  
Mogs  
Atg14  
Trmu  
Dusp28  
Yod1  
Nudt17  
Spast  
Endou  
Vwf  
Tagln  
Tyro3  
Pcdcl1  
Ythdf3  
Ccde50  
Ttc38  
Ccde104  
Lsm12  
Psd2  
Chmp1b2  
Mapkap1  
Rufy2  
Pard6b  
Cd74  
Gm10704  
Gm20425  
Stxbp6  
Ccde40  
Pcnp  
Mllt11  
Gpr107  
Serpina1b  
Ctnnal1  
Rpl6;Gm5428  
Tmem160  
Eif2s3y  
Snx8  
Stom  
Rras  
Tdrp  
Prkra  
Thyn1

Mrpl10  
Purg  
Cisd3  
Ksr1  
Map3k10  
Taf15  
Baz2b  
Wdr82  
Naa50  
Slc6a13  
Cobll1  
Itih1  
Ddx31  
Gm11568;Krtap9-  
1;Gm11559;Gm11567  
Npm3  
Foxj3  
Hmga1  
Fggy  
Ddx10  
Vps37b  
Kcnip3  
Pofut2  
Sec24a  
Tmem55a  
Till1  
Stab1  
Hras  
Nphp4  
Nup43  
Cmtm6  
Utp6  
Zw10  
Ankrd34a  
Il18  
Prr12  
Atp5sl  
Hspb11  
Tbk1  
Rab32  
Dbh  
Cenpf  
Eif1ax  
Cuedc2

Cnot3  
Syngn2;Gm20708  
Fcho1  
Hsbp1  
Rabepk  
Lbp  
Lrrfip2  
Pbx3  
Sntb2  
Prune  
Man2b2  
Cic  
Glyat13  
Dpy30  
8030462N17Rik  
Zfyve16  
Dock5  
Ube2j2  
Magi3  
Cramp11  
Polr2g  
Golga1  
Mdga1  
Tex10  
Cdk2  
Irf2bp1  
Chd5  
Samd4a  
Wac  
Ddx60  
Kbtbd2  
Gm20431;Ube2v1  
Ca1  
Med15  
Adecyap1r1  
Hnrnp1  
Rpl21  
Paqr4  
Cd14  
Pdxdc1  
Nhp211  
Astn2  
Ciz1

Wtap  
Adamts1  
Ccnyl1  
Bcl11a  
Gpatch8  
Frmd5  
Ranbp6  
Snrnp35  
Slc4a7  
Cuta  
Dhfr  
Slc17a8  
Tle3  
Ppp1r18  
Pigu  
Dcun1d1  
Fxr2  
Adi1  
Nrip2  
Lamtor2  
Wwp2  
Gc  
Mkl1  
Rbm6  
Gigyf1  
Hrg  
Aqp1  
Tmem201  
Krt83  
Gga1  
Rpl28  
Mic1  
Eps812  
Adhfe1  
Ppil1  
Zfp37  
Elmsan1  
Ccdc43  
Nsg2  
Ubash3b  
Hist1h2bf  
Tyw1  
Cep55



Ube2z  
Ca8  
Cnep1r1  
Gramd3  
Tbca  
Fam172a  
Gtf2h4  
Tnrc6b  
Dmd  
Synm  
Lmbrd1  
Abcf1  
Txndc17  
Trip12  
Ttc30b  
Mpdu1  
Srp9  
Soga1  
Znf281  
Gm16286;Naa11  
Sepw1  
Lchn  
Atm  
Chrm1  
Lace1  
Atg12  
Lynx1  
Zmym4  
Specc11  
Folh1  
Zak  
Eml4  
Hdac4  
Sike1  
Spen  
Trex1  
Rtn4r  
Kank3  
Med24  
Tmem57  
Rabgap11  
Rab11fip5  
Aasdhpt

Usp18  
Ndufab1  
Pfdn6  
Pik3ip1  
Timm10  
Sirt6  
Ankrd46  
Map7  
Rgma  
Hcn4  
Txnl4a  
Cln6  
Polr3a  
Foxo3  
Plod3  
Pcdh19  
Bbs5  
Prdm10  
Isy1  
Epb4115  
Ankrd24  
Tmem237  
Prickle1  
Thsd4  
Kif11  
Ascc2  
Lsm8  
Uap111  
Pvalb  
Rbm27  
Isca1;AK157302  
Chac2  
Ubp1  
Cfap20  
Tor1b  
Cnst  
Arid5b  
04-Sep  
Kndc1  
10-Sep  
Dtd2  
Fbxo18  
Inmt

Drg2  
Grb10  
Poglut1  
Psmb9  
Usmg5  
Ifit2  
Ddx47  
Kcnj13  
Coa5  
Gramd1b  
Timm17b  
Pipox  
Fem1b  
Rcbtb1  
BC068157  
Pds5a  
Igtf  
Kctd13  
Stambp  
Ccdc92  
Grn  
Ap1s2  
Cstf1  
Slc24a2  
Lmo7  
Itga2  
Tlk2  
Commd9  
Safb2  
Fam208a  
Gmpr2  
Nxf1  
Eif2ak2  
BC048403  
Rbfox1  
Vhl  
Nbeal2  
Asah2  
Thrsp  
Cnot6l  
Mast4  
Zranb2

Mtco2;mt-Co2

0610037L13Rik

S100a5

Kcnj9

Phf2011

Mgst1

Sp100

Aes

Mers1

Igfbp2

Jcad

Ugg2

Clic6

Nob1

Cyth3

Ispd

Pcyt1a

Nrn1

Gpx3

Mrps15

Ecm29;A1314180

Dynlt1

Sf3b3

Sult1d1

Cbl1

Ube2d3

Smpd4

Tox4

Lama2

Wdr6

Slc25a18

Nelfe

Iqgap2

Gnptg

Radil

Snx11

Hoxd10

B3gnt2

Cilp

Kdm5b

Arpp19

Sez6l2

Ppp1r3f

Cbl

Srrt  
Ahnak  
Guf1  
Csnk1g2  
Trim46  
Tbc1d10a  
Slc35e1  
Zbtb18  
Atp13a3  
Dcaf5  
Fbxl17  
Setdb1  
Crip1  
Mrpl46  
Lpcat2  
Aars  
Dnaje16  
Mrpl45  
Spire1  
Pik3cd  
Mib2  
Tenc1  
Abhd5  
Plekhg1  
Dnmt3a  
Ttc26  
Nrf1  
Rps6ka5  
Dcp2  
Dhx36  
Fyco1  
Polr1b  
Rltpr  
Nlrx1  
Srsf10  
Znf830  
Mrps5  
Sec23ip  
Gosr1  
Psmg3  
Ogfr11  
H2bc3

Striatum enriched

| Common   | Mouse Proteome Residual        | DA-FASS Proteome Residual |
|----------|--------------------------------|---------------------------|
| Tmod1    | B9d2                           | Rab4a                     |
| Smpd3    | Gdpd2                          | Abi2                      |
| Necab2   | Ercc4                          | Ndufa5                    |
| Dlgap3   | 03-Sep                         | Dmx11                     |
| Camk4    | Mlf2                           | Clvs2                     |
| Spata21  | Ppp1r9a                        | Ube2l3                    |
| Scn4b    | Nexn                           | Ruvbl2                    |
| Cacng4   | St8sia3                        | Lingo1                    |
| Dpp6     | Wdr17                          | Nt5dc3                    |
| Rasgrp2  | Alg1                           | Shroom2                   |
| Gprin3   | Kcna4                          | H2bc3                     |
| Sh2d5    | Rps6ka4                        | Arpc1a                    |
| Syt17    | Mpped2                         | Glde                      |
| Cacna2d3 | Znf365                         | Mcu                       |
| Akap5    | Mrps14                         | Gstm2                     |
| Phactr1  | 2010300C02Rik                  | Gphn                      |
| Ankrd63  | Ept1                           | C2cd4c                    |
| Dgkb     | Asic4                          | Psm4                      |
| Icam5    | Atf2                           | Ppm1e                     |
| Chrm4    | Rgs7bp                         | Mrps22                    |
| Me3      | Clip4                          | Tmed10                    |
| Dlgap2   | Pomk                           | Stxbp5l                   |
| Mff      | Dtnbp1                         | Capzb                     |
| Gnal     | Mst4;2610018G03Rik             | Cyb5r3                    |
| Ptpn5    | Ext2                           | Tbc1d24                   |
| Plxna2   | Cacnb2                         | Septin9                   |
| Chat     | Kbtbd3                         | Otub1                     |
| Cbr3     | Mtstp8;mt-Atp8                 | Syt2                      |
| Shank3   | Ace                            | Snap91                    |
| Rgs9     | Hist2h2ac;Hist2h2aa1;Hist1h2al | Ppia                      |
| Stk32c   | Slc35f3                        | Blvrb                     |
| Cyld     | Pde8b                          | Rap1a                     |
| Shisa7   | Arpp21                         | Hsd17b8                   |
| Fbxl16   | Penk                           | Sar1b                     |
| Lrrc7    | Foxp1                          | Sarm1                     |
| Rgs20    | Tesk1                          | Astn1                     |
| Elmod1   | Pes1                           | Ak2                       |
| Flrt3    | Inf2                           | Dctn3                     |
| Itpka    | Ckap2l                         | Plppr1                    |
| Tiam2    | Psd                            | Olfm3                     |
| Pde2a    | Myl4                           | Ret                       |
| Gpm6b    | Bcl11b                         | Faf2                      |

|         |               |         |
|---------|---------------|---------|
| Smpd13b | Krit1         | Hsd17b4 |
| Cyp2s1  | Tspan9        | Actn4   |
| Ngef    | Synpo2        | Ppp5c   |
| Pde10a  | Rasgef1a      | Dcc     |
| Synpo   | Slc7a7        | Rhob    |
| Baiap2  | Mesdc1        | Psmc11  |
| Grm2    | Impdh1        | Ermp1   |
| Pcbp2   | Pcdhga9       | Psph    |
| Hpca    | Rem2          | Glo1    |
| Sipa111 | 4933434E20Rik | Tigar   |
| Strip2  | Fchol         | Ntrk2   |
| Rap1gap | Lhx2          | Dhrs7b  |
| Actn2   | Trim27        | Slc38a1 |
| Pde1b   | Sez6          | Gpr3711 |
| Anks1b  | Sptlc1        | Trappc3 |
| Lzts3   | Nsg2          | Tom112  |
| Rps6ka2 | Mapk4         | Arih1   |
| Slc30a3 | Ccm2          | Slc17a6 |
| Ache    | Entpd3        | Gad1    |
| Kcnj4   | Nucb2         | Omg     |
| Prkcd   | Adamts5       | Yars1   |
| Rcn1    | Srgap1        | Gss     |
| Gng7    | Lmo7          | Impdh2  |
| Ablim2  | Jcad          | Atp1a1  |
| Rgs14   | Mast3         | Etfp    |
| Rin1    | Radil         | Immt    |
| Ptk2b   | Sgpp1         | Pank4   |
| Gabrd   |               | Tmem33  |
| Cacna1e |               | Tprg11  |
| Dnm1    |               | Cend1   |
| Gls     |               | Arf2    |
| Slc6a3  |               | Pmm1    |
| Syngap1 |               | Pithd1  |
| Grm5    |               | Dnajc11 |
| Gsg11   |               | Stk24   |
| Th      |               | Vps4b   |
| Adcy5   |               | Rab9b   |
| Ppp1r1b |               | Slc30a1 |
| Slc18a2 |               | Prkag2  |
| Kcnip2  |               | Stt3a   |
| Rgs8    |               | Nrcam   |
| Kcnab1  |               | Vps53   |
| Ddc     |               | Lypla1  |

Cpne5  
Crym  
Rasa1  
Homer1

Txndc5  
H2az1  
Ttc39c  
Camk1d  
Psmf1  
Nos1  
Letmd1  
Cdk5  
Sod2  
Cct2  
Adam23  
Idh3g  
Pick1  
Strn4  
Tnpol  
Cox4i1  
Atp6v1e1  
Chchd6  
Cds2  
Calb2  
Spag9  
Drd1  
Asap1  
Txnrd2  
Arpc5l  
Grid1  
Gabra1  
Kcnc1  
Rac3  
Eef1g  
Arl8b  
Vamp2  
Cdh11  
Rab12  
Mindy2  
Pfk1  
Pacsin2  
Idi1  
Hepacam  
Napb  
Mpp2  
Sec13  
Plp1



Ndufs4  
Ldhd  
Clint1  
Vcan  
Tst  
Hnrnpk  
Paip1  
Nln  
Stx8  
Mdp1  
Cystm1  
Sv2c  
Dcaf7  
Pdia3  
Capns1  
Syn1  
Cadm4  
Pi4k2a  
Doc2a  
Aimp1  
Gnaq  
Dock3  
Unc13a  
Pip4k2b  
Rab3a  
Ywhae  
Atp6v0a4  
Magi1  
Gbe1  
Aida  
Sord  
Macf1  
Ctbp2  
Fahd1  
Lyst  
Ap1s1  
Bcl2l1  
Rab3gap1  
Ptpns  
Myo5a  
Gprc5b  
Arc  
Lta4h

Zdhhc5  
Rab11b  
Psm2  
C1qbp  
Cpd  
Eef2  
Kcnip4  
H2aj  
Ubqln1  
Agpat3  
Gmfb  
Iqsec1  
Eef1d  
Atp6ap2  
Nudc  
Cry11  
Ipo5  
Usp46  
Lrba  
Ndufaf2  
Gpsm1  
Ppp2ca  
Ocr1  
Pi4ka  
Srp54  
Eif2s3x  
Rock2  
Fech  
Crybb1  
Ckb  
Atp5pd  
Snx7  
Tpm3  
Rabggta  
Emd  
Eif2s1  
Ndufb3  
Dab2ip  
Plcl1  
Wasl  
Akt3  
Tomm40  
Cct6a

Apool  
Cpnc7  
Pebp1  
Uba5  
Ppfia3  
Ube2m  
Eef1a1  
Ctnna2  
Tbc1d17  
Hba  
Arl6ip1  
Cops4  
Dsg1a  
Arfgef3  
Hhrrnph1  
Dst  
Apeh  
Bcat1  
Tecpr1  
Mboat7  
Gria1  
Ndel1  
Scamp1  
Ppm1h  
Ran  
Psmc4  
Cadm1  
Vapb  
Trnt1  
Mdga2  
Plxna1  
Grm7  
Asl  
Rundc3a  
Acbd6  
Ttc7b  
Tars2  
Coro2b  
Aldh18a1  
Grik3  
Ddx3x  
Slc3a2  
H2bc1

Stxbp5  
Crtac1  
Uqcrb  
Ppm1a  
Hprr1  
Gcdh  
Ddah2  
Calr  
Hbb-b1  
Mark2  
Wasf3  
Mlycd  
Flii  
Snap29  
Nrxn3  
Pls3  
Csnk2b  
Efnb3  
Atic  
Lrfn4  
Cdk16  
Ppid  
Abhd3  
Slc12a5  
Begain  
Suclg1  
Prickle2  
Ykt6  
Zer1  
Dlgap4  
Atp1b1  
Map2  
Xkr4  
Scn1a  
Acot10  
H2bc14  
Vps18  
Sh3glb1  
Vps11  
Actc1  
Vcp  
Mthfd11  
Cacna1b

Idh2  
Anxa7  
Katnal1  
Fam171a2  
Selenoi  
Purb  
Kctd16  
Vps13c  
Htt  
Got1  
Rpn1  
Tbcel  
Atp2a1  
Grin2b  
Fasn  
Dpp10  
Gak  
Psmc6  
Cd38  
Wfs1  
Gpd1  
Dhodh  
Pgm2  
Ndufs7  
Coq6  
Cacnb3  
Sorcs2  
Mgst3  
Acadsb  
Hacd3  
Gk2  
Grm8  
Ndufa9  
Pgs1  
Ppp1cb  
Stam  
Pag1  
Uchl3  
Osbp1a  
Mrps27  
Crip2  
Cacng2  
Stmn3

Lpcat4  
Slc7a5  
Sort1  
Nrxn2  
Aprt  
Eif3j1  
Cyc1  
Septin8  
Adrbk2  
Tanc2  
Scarb2  
Mtmr9  
Shmt2  
Mfsd4a  
Cd81  
Dync1li2  
Pip5k1a  
Ttc9b  
Prkab2  
Lrpprc  
Cpt1a  
Atp5f1b  
Nudt5  
Elmo1  
Arl6ip5  
H2ax  
Gga3  
Pld3  
Plppr4  
Snta1  
Trim3  
Iqsec2  
Atp5f1c  
Gdi1  
Dcun1d3  
Tsr2  
Atp2a2  
Wdr47  
Lrrc15  
Ptpn23  
Mmut  
Dctn2  
Acad9

Srprb  
Atp1a2  
Mapre3  
Crmp1  
Hist2h2aa1; Hist2h2aa2  
Ptpn11  
Ahcy  
Ndufs2  
Fahd2  
Dsp  
Mtap  
Capn5  
Eloc  
Fcsk  
Adgrl2  
Gna11  
Slc8a2  
Hist2h2bb  
Cnrip1  
Cacybp  
Sirpa  
H3-5  
Tomm22  
Ndufb11  
Gsk3a  
Grin1  
Gabra5  
Sgta  
Rab8b  
Ugt1  
Ppp3ca  
Gpx4  
Rptor  
Pof1b  
Snap47  
Atp6v1g2  
Syne1  
Usp9x  
Timm9  
Ubr4  
Cox15  
Coro1b  
Uba1

Atp6ap1  
Calcoco1  
Aldoc  
Tmem132a  
Psm8  
Dpysl5  
Lingo2  
Maip1  
Itgb2  
Ubxn6  
Gstm7  
Katnb1  
Abhd6  
Cdh2  
Vdac2  
Smap1  
Anxa2  
Vps33a  
Map6  
Pde4d  
Pptc7  
Cc2d1a  
Aak1  
Slc25a25  
Dhrs7  
Chmp4b  
Vac14  
Gmppb  
Rars2  
Copg2  
Eif6  
Vamp1  
Galk1  
Ehd3  
Aplp2  
Rabgap1  
Nsdhl  
Mthfd1  
Slc10a4  
Ddt  
Cacnb4  
Prnt3  
Bphl



Psm5  
Relch  
Dpp3  
Pak3  
Rab22a  
Rtn3  
Ggt7  
Pgam5  
Camk2d  
Abi1  
Pygb  
Cpne2  
Hspa12b  
Tenm2  
Nfs1  
Pdlim5  
Dnaja3  
Ndufa2  
Nedd4l  
Pycr3  
Mri1  
Snx30  
Ankrd34b  
Tuba3a; Tuba3b  
Shisa4  
Cdh10  
Aldh112  
Csde1  
Arhgap21  
Acacb  
Acsf3  
Shank2  
Pak1  
Cyfip2  
Acad8  
Pdk2  
Naca  
Kcnj10  
Pgrmc2  
Poldip2  
Tln1  
Epdr1  
Ubqln2

Asrgl1  
Tsg101  
Cct7  
Slc7a10  
Copb1  
Robo2  
Fyn  
Cmtm4  
Ca4  
Kirrel3  
Slc9a7  
Cops5  
Dmwd  
Syn2  
Vat1  
Dlg2  
Cadps  
Cacna2d1  
Acta2  
Aifm1  
Tmem121b  
Apoo  
Numb  
P2ry12  
Necap1  
Lman2  
Adora2a  
Ncstn  
Dtymk  
Rmnd5a  
Grm1  
Pik3r1  
Scamp5  
Syt5  
Acot1  
Pccb  
Fabp5  
Ppfia2  
Pfkp  
Tubb3  
Dtd1  
Clptm1  
Gpm6a

Nisch  
Mpp6  
Rcan1  
Pmpca  
Nt5c  
Eci1  
Asah1  
Galc  
Kcnma1  
Vps50  
Stx6  
Gnb5  
Afdn  
Tgm1  
Eif3l  
Calm2  
Snx4  
Pcyt2  
Dock10  
Ajm1  
Slc2a13  
Palm2  
Ampd3  
Unc13b  
Rab15  
Actb12  
Rab30  
Nck1  
Wnk2  
Lcp1  
Plxnb1  
Txnl1  
Nipsnap3b  
Arfgap1  
Snx27  
Atp5md  
Map2k1  
Tubg2  
Slc6a9  
Gsdma3  
Pacs2  
Ncan  
Arpc3

Lrrtm2  
Cntn4  
Kctd12  
Scn2b  
Atp6v1f  
Gabbr1  
Surf1  
Slc25a5  
Micu3  
Actn1  
Kbtbd11  
Wdr7  
Sdr9c7  
Clcn4  
Adprs  
Rhoa  
Rtcb  
Appl2  
Ndrg4  
Hace1  
Arg1  
Mink1  
Serpib1a  
Acaa1b  
Ndrg2  
Dnajb1  
Ryr2  
Cand1  
Hspa5  
Atg5  
Abat  
Skt  
Rims1  
Strn3  
Rpl13  
Tuba1a  
Slc25a10  
Mlst8  
Gps1  
Psmc3  
Gng3  
Ogt  
Rabggtb

Prrt2  
Slc12a6  
Pdk3  
G6pdx  
Cct3  
Calb1  
Chn1  
Pgm2l1  
Sh3gl2  
Mapt  
GOLGA7B  
Cndp2  
Palm  
At1l  
Isoc1  
Adh5  
Elob  
C1ql3  
Cryz  
Bcap29  
Agpat4  
Rmnd1  
Rars1  
Nptx1  
Rad23b  
Rab18  
Psmb7  
Ppa2  
Txnrd1  
Tubb4a  
Nccrp1  
Atp5pb  
Hsd1l2  
Pigs  
Slc1a3  
Cacng3  
Sv2b  
Dclk1  
Hsp90ab1  
Tomm20  
Pdha1  
Mtor  
Bcap31

Arfp2  
Tcp1  
Ephx1  
Glul  
Tollip  
Rab3b  
Mpp3  
Lrrc4b  
Mtatp6  
Vcpip1  
Slc9a1  
Arhgap23  
Emc1  
Atp6v1e2  
Arl8a  
Fmnl1  
Adam22  
Tiprl  
L2hgdh  
Epb41l3  
Stat1  
Vps26b  
Psm3  
Mydgf  
Znr2  
Scai  
Vps29  
Dagla  
Rab6b  
Vps4a  
Prps1  
Ppp2r1a  
Nedd4  
Mrps23  
Rps5  
Gspt2  
Clip1  
Tmem63b  
Pde1a  
Nudt10  
Ndufa6  
Diras1  
Sik3

Cyria  
Rdx  
Nbea  
Acot9  
Syng1  
Bcl2l13  
Sncg  
Rab27b  
Vamp7  
Blmh  
Slc24a4  
Pgm3  
Pdcd10  
Syt3  
Gpr158  
Carm1  
Gsr  
Hsd17b10  
Trappc4  
Kif21a  
Cdipt  
Wipf3  
Sult4a1  
Fkbp8  
Adgrb1  
Acsl3  
Rnf214  
Gas7  
Cntn1  
Itgb8  
Abhd17a  
Ndufc2  
Ak1  
Cct6b  
Neb1  
Mark1  
Slc32a1  
Gprin1  
Xpo7  
Git2  
Pgbd5  
Ndufb10  
Slc25a42

Nefh  
Mat2b  
Aldh1b1  
Tjp1  
Gstp2  
Cdc37  
Cct8  
Svop  
Mical3  
Mrs2  
Ndufb4  
Hsd17b13  
Pdhx  
Aldh1a1  
Mapk8  
Grin2a  
Rpn2  
Aldh1a7  
Nt5e  
Gapdh  
Eif5a  
Camk2a  
Tgm3  
Ech1  
Nme2  
Cplx2  
Fam136a  
Gfra2  
Traf3  
Abcb8  
Akr1b7  
Lrp1b  
Slc1a2  
Mag  
Hcn2  
Cox5a  
Armc8  
Gucyl1a1  
Gdpd1  
Tmem143  
RTRAF  
Rps2  
Synj2bp



Rogdi  
Septin11  
Glr3  
Cacng8  
Psm6  
Hagh  
Sucla2  
Cyp46a1  
Mdh1  
Mapre2  
Mapre1  
Ttyh3  
Gsdma2  
Uqcr10  
Tenm1  
Cpt2  
Rimbp2  
Atp2b2  
Map4  
Vps35  
H2bc11; H2bc13; H2bc15; H2bc7  
Hars1  
Sfxn1  
Commd3  
Cox6c  
Bin1  
Cfl2  
Csm1  
Rap2b  
Gsta4  
Sh3glb2  
Srgap2  
Wars1  
Kif2a  
Sgsm1  
H2bc12  
Pip5k1c  
Arrb1  
Arhgdia  
Suclg2  
Slc6a11  
Ociad1  
Septin5

Myo6  
Epn2  
Ppp2r2c  
Ass1  
Timm23  
Cpe  
Arl15  
Pdyn  
Hecw2  
Afg3l2  
Napg  
Aifm3  
Gapdhs  
Ubtd1  
Spr  
Ppox  
Actr1a  
Paics  
Irgm1  
Rab11a  
Gnas  
Jup  
Rtn1  
Gja1  
Dgke  
Erlin2  
Myh9  
Lysmd2  
Dap3  
Akr1e2  
Gpsm2  
Prdx3  
Tmem256  
Lancl1  
Gde1  
Fermt2  
Slc30a9  
Ap2a1  
Ppp2r5c  
Adss2  
Ntng2  
Smyd5  
Ppp6c

Adprh  
Eef1a2  
Mfsd6  
Prkar2a  
Itgam  
Slc6a6  
Ndufaf3  
Coa3  
My112b  
Hnrnpa2b1  
Rab33b  
Gabra3  
Ccde51  
Acp6  
Rack1  
Cops3  
Zzef1  
Rgs6  
Lap3  
Acyp1  
Capn1  
Gria2  
Psm14  
Gabra2  
D1Pas1  
Chordc1  
Stoml2  
Rps6ka1  
Tomm401  
Cpne8  
Prmt8  
Hpcal1  
Apba1  
Ap1m2  
Arf5  
Ndubf7  
Nckap1  
Prkcg  
Dnm3  
Acat1  
C2cd5  
Grb2  
Coa7

Tpi1  
Tpm2  
Hhrnph2  
Mpc2  
Smcr8  
Dsg1b  
Tsn  
Ap2s1  
Iglon5  
Kpnb1  
Ahsa1  
Btbd17  
Oga  
Cnksr2  
Lrrtm1  
Pip4p2  
Ntrk3  
Rab39b  
Atp6v1h  
Rhot2  
Slc2a3  
Fth1  
Pkm  
Mapk1  
Cmpk1  
Cops8  
Hist1h2af  
Arhgef12  
Amph  
Nlgn4l  
Aldh3a2  
Pdia4  
Stxbp3  
Ttc1  
Nck2  
Nfu1  
Hspa9  
Fbxo3  
Tpd52  
Gmppa  
Elfn2  
Clic4  
Prep

Atg2b  
Psmc6  
Ccde177  
Rab24  
Rnf141  
Ipo4  
Abr  
Cdk14  
Slc6a17  
Ii1rap1  
Trpv2  
Slc25a20  
Dnaja2  
Cnm1  
Psm7  
Ppp6r1  
Atp6v1g1  
Sod1  
Pitrm1  
Dbnl  
Ppp1ca  
Tmem9b  
Msn  
Adam11  
Fbxo41  
Dnajb4  
Nipsnap2  
Mtc1  
Rab5a  
Gabrg2  
Picalm  
Slc44a1  
Pura  
Irgq  
Fam177a1  
Osbp12  
Dpysl4  
Vdac1  
Gpd2  
Psmc5  
Exoc5  
Dctn1  
Flna

Mfn2  
Ptges3  
Tenm3  
Mccc2  
Tmx1  
Alg2  
Pgam1  
Hspd1  
Chmp1a  
Gmps  
Ctnnd2  
Sorcs3  
Maob  
Slmap  
Soga3  
Wbp2  
Plxnc1  
Msra  
Tnr  
Isyna1  
Pex5l  
Negr1  
Sri  
Ddx1  
Stim1  
Tpbp  
Grik5  
Uchl5  
Pitpna  
Mlc1  
Arhgap39  
Fgf12  
Fibp  
Stmn2  
Ak5  
Echdc1  
Setd7  
Babam1  
Akap12  
Glod4  
Rps6ka3  
Kif1b  
Dync1h1

Stum  
Timm13  
Mtmr2  
Ca2  
Mtfp1  
Uqcrq  
Sec23a  
Rap2a  
Vps25  
Ezr  
Plaa  
Dync11i1  
Nap111  
Lin7a  
Abhd10  
Taok1  
Tm9sf3  
Prnp  
Rps13  
Ctsd  
Tesc  
Grpel1  
Wdr48  
Cox6b1  
Actg2  
Usp7  
Eea1  
Acat2  
Camkk2  
Brinp1  
Atp1a3  
Tkt  
Uso1  
Trim32  
Gdi2  
Mrpl12  
Pdpk1  
Atp5f1d  
Scfd1  
Rap1gap2  
Cd47  
Ndufs1  
Cul2

Crat  
Vps13a  
Timm29  
Akr7a2  
Ckap4  
Nefm  
Clip2  
Slc18a3  
Epb41  
Fsd1  
Atp5mg  
Ptpn9  
Acaca  
Psm13  
Epha4  
Nlgn2  
Mtmr1  
Cny  
Coq3  
Sar1a  
Cadps2  
Cisd1  
Kif5a  
Dctn5  
Vapa  
Agk  
Tubg1  
Pip4k2c  
Exoc8  
Thsn1  
Vsn1  
Cdc42  
Git1  
Acsl6  
Gsto1  
Opa1  
Dbn1  
Vps33b  
Sec61a1  
Slc25a3  
Ctbp1  
Gap43  
Prune1



Erp44  
Hsp90aa1  
Appl1  
Cat  
Clcn6  
Clcn3  
Arpc2  
Get4  
Cpne3  
Ndr3  
Slc25a4  
Pnp  
Dip2b  
Ptk2  
Psm2  
Lrpap1  
Sh3gl1  
Chkb  
Fabp3  
Marchf5  
Olfm2  
Dlg1  
Pgam2  
Cops7a  
Gba  
Cryz1  
Csrp1  
Septin2  
Them4  
Slc6a1  
Rapgef4  
Kent1  
Mat2a  
Retreg2  
Gnb1  
Aldh8a1  
Rala  
Ndufs6  
Lmna  
Clic1  
Impact  
Ptges2  
Pak2

Myl6  
Cryab  
Copb2  
Tmem30a  
Sema7a  
Hint1  
Cltc  
Padi2  
Tpd52l2  
Psat1  
Brsk1  
Sgtb  
Ywhab  
Ptrh2  
Capn2  
Timm50  
Ide  
Hdhd3  
Lmtk2  
Map2k6  
Fkbp1a  
Tppp3  
Srm  
Ube2n  
Nsfl1c  
Cyfip1  
Mlec  
Slc12a9  
Grm3  
Aheyl1  
Thop1  
Slc12a2  
Cit  
Sec31a  
Anxa3  
Ctnnb1  
Impa1  
Farp1  
Aldh1l1  
Pitpnc1  
Jam3  
Acvr1b  
Csnk1e

Sfxn5  
Plpp3  
Kalm  
Eif4e  
Vkorc111  
Adk  
Ddx19a  
Acta1  
Trap1  
Madd  
Pcbp1  
Cldn11  
Cacna2d2  
Sdhb  
Ncln  
Mtpn  
Sptan1  
Selenbp1  
Aldh5a1  
Sugt1  
Tpt1  
H2bc4; H2bc6; H2bc8  
Hint2  
Osbp  
Plxnb2  
Acadm  
Hint3  
Pabpc1  
Gnl1  
Igbp1  
Nagk  
Vps26a  
Bcas3  
Hspa12a  
Ssr1  
Dlat  
Gpr52  
Micu1  
Cd200  
Pacs1  
Strap  
Inpp5a  
Rab3gap2

Srpk2  
Camkv  
Dgki  
Mtn4  
Iqsec3  
Gba2  
H3-3a; H3-3b  
Aren1  
Arfgef1  
Psm2  
Lancl2  
Ttpal  
Unc13c  
Sh3kbp1  
Mmab  
Aldh7a1  
Prkar2b  
Slk  
Atp2a3  
Wdr45  
Lgalsl  
Dnpep  
Rab3c  
Bcr  
Dld  
Nit1  
Gget  
Mtx1  
Plscr3  
Ndr1  
Tab1  
Eps15l1  
Cyb5r1  
Fbxo2  
Eipr1  
Slc1a6  
Lrrc57  
Prpsap2  
Camk2b  
Inpp4a  
Iqcb1  
Atp6v0a1  
Lrp1

Islr2  
Ina  
Gabrb2  
Stx16  
Bmerb1  
Serpinb6  
Dsg1c  
Tagln2  
Xpo1  
Ist1  
Coro1a  
Arf1  
Sco1  
Rnh1  
Calml3  
Bmpr2  
Hadh  
Mrps31  
Atad3  
Srcin1  
Epm2aip1  
Atp5fle  
Atp6v1d  
Pafah1b3  
Pepd  
Stx4  
Pdpr  
Septin4  
Ppa1  
Nme1  
Abcg2  
Slc25a11  
Ap2m1  
Pdhb  
Lmbrd2  
Rftn2  
Acadv1  
Ndufb8  
Snx2  
Uqcc1  
Add3  
Caskin1  
Arl1

Wdr54  
Synrg  
Mtf1l  
Cfl1  
Uqcrc2  
Tmem65  
C2cd2l  
Tmx4  
Acaa1a  
Uqcrfs1  
Asphd2  
Itp1  
Psmc2  
Atp2b1  
Ppib  
Gabarapl2  
Naxe  
Pitpnm1  
Pik3c3  
Dynll1  
Hal  
Rad23a  
Mdh2  
Adecy9  
Ntng1  
Rtn4  
Cep170  
Fhl1  
Afg3l1  
Abcb9  
Mccc1  
Capza2  
Hars2  
Blvra  
Sacm1l  
Gfm1  
Rcn2  
Pls1  
Erp29  
Prdx2  
Lysmd1  
Cops6  
Ube2k

Slc7a2  
Atp9a  
Marcks  
Hsd1l  
Pmpcb  
Rnpep  
Gpr88  
Epn1  
Scn3b  
Atp1b3  
Ncs1  
Mapk8ip3  
Psmc1  
Tenm4  
Sdhd  
Crkl  
Map1b  
H3c1; H3c10; H3c11; H3c8  
Prmt1  
Por  
Kcna2  
Aqp4  
Sars1  
Septin6  
Cnr1  
Ndufa7  
Opa3  
Aspa  
Lamtor1  
Rasl2-9  
Scp2  
Nol3  
Rpsa  
Bsn  
Mapk3  
Vgf  
Lrtm2  
Dync1i2  
Rab9a  
Hsp90b1  
Tcbp  
Oplah  
Ap2a2

Cbr4  
Dnaje5  
Cap1  
Hk2  
Stub1  
Ptd3  
Plcb1  
Srgap3  
Cspg5  
Gk  
Rab5c  
Ppp3r1  
Rab6a  
Ogdh  
Reps1  
Lgi1  
Igsf8  
Arf4  
Rplp0  
Pcyox1  
Diras2  
Ivd  
Rabgef1  
Gstk1  
Atp5po  
Itgav  
Tsfm  
Pik3r4  
Agap3  
Dhrs4  
Araf  
Ncdn  
Vim  
Colla2  
Prodh  
Rabep1  
Tamm41  
Pdcd6ip  
Aloxe3  
Slc38a3  
Pck2  
Flot2  
Tuba4a



Gnai3  
Slc4a3  
Emc2  
Psmb1  
Synpr  
Tmx3  
Efr3b  
Prkar1b  
Rhot1  
Agap1  
Hyou1  
Nsf  
Acot11  
Cpm  
Psmb5  
Daam1  
Dtnb  
Tm9sf2  
Atg16l1  
Wdr77  
Rab10  
Aars1  
Twf2  
Slc25a13  
Dnajb2  
Idh3a  
Prkar1a  
Gch1  
Neto2  
Ryr3  
Arhgef7  
Kiaa1549  
Prxl2b  
Ftl1  
Synj1  
Hpcal4  
Eif4b  
Aco1  
Fam126b  
Snca  
Taldo1  
Aco2  
Maoa

Hspa4  
Map1lc3a  
Asic1  
Nrbp2  
Cct4  
Vps51  
Gstm5  
Slc22a23  
Glr5  
Timmec1  
Sv2a  
Rab23  
Ado  
Pten  
Glud1  
Abhd12  
Ndufv1  
Cs  
Psmc7  
Ephx2  
Slpr1  
Chrb2  
Ap1g2  
Slc25a23  
Cad  
Actb  
Pam  
Rab7a  
Eno1  
Actr2  
Prmt1  
Aldoa  
Lin7c  
Ap3b1  
Acot7  
Klc2  
Mtch1  
Phyhip1  
Pip5k1b  
Acy6  
Heatr5b  
Slc4a8  
Rac1

Tom1  
Actr10  
Mpi  
Pgl3  
Adam10  
Wdr1  
Exog  
Spg7  
Thy1  
Akap7  
Nptxr  
Myo18a  
Cntnap2  
Ndufa13  
Vat11  
Bdh1  
Entpd2  
Npepps  
Arl2  
Wdr37  
Agpat5  
Ccdc136  
Tpd5211  
Myadm  
Ndufa4  
Hibadh  
Osbp110  
Psmb4  
Cpne9  
Eef1b  
Aplg1  
Hccs  
Memo1  
Arhgef6  
Tfrc  
Ank2  
Fxyd6  
Ptpn2  
Alcam  
Ap3m2  
Anxa4  
Plcg1  
Cacna1a

Snx1  
Lamp2  
Ap1m1  
L1cam  
Usp15  
Eci3  
Eml5  
Sorbs2  
Tars1  
Kiaa0513  
Rapgef2  
Ube2v2  
Klc1  
Mpst  
Spcs2  
Gmpr  
Cops2  
Sec22b  
Arhgap32  
Csnk2a1  
Gatd3a  
Psm1  
Ube2o  
Dlg4  
Hip1  
Pfn1  
Plcd1  
Ube3a  
Stx1b  
Stip1  
Elmo2  
App  
Gnaz  
Ndufa11  
Dennd11  
Ldha  
Atp6v1a  
Celsr2  
Cul1  
Gabbr2  
Psm12  
Cnp  
Ppm1f

Prkcsh  
Hexb  
Tmem126a  
Eif4a1  
Napa  
Ppp1r9b  
Dynlrb1  
Plxnd1  
Atp5mf  
H2ac20  
Cct5  
Atp2b4  
Cul3  
Exoc3  
Gstm1  
Ywhag  
Fah  
Ndufb5  
Vps52  
Basp1  
Hip1r  
Rufy3  
Nefl  
Cap2  
Hsd17b12  
Lsamp  
Nif311  
Dad1  
Glg1  
Snx6  
Phyhip  
Syt7  
Gnb4  
Mtnd5  
Gdap1  
Avl9  
Cltb  
Elmod2  
Ppp2r5e  
Aldh6a1  
Fundc2  
Src  
Fkbp4

Tmem163  
Slc25a46  
Oxsr1  
Cadm3  
Tbcd  
Vwa8  
Eif5  
Arpc5  
Trappc9  
Endod1  
Rdh14  
Prdx6  
Me1  
Gaa  
Pc  
Gabbr3  
Gsn  
Neo1  
Crk  
Atp6v0d1  
Xpnpep1  
Mras  
Mt-Cyb  
Nans  
Tdrkh  
Wdr13  
Csnk1a1  
Sgip1  
Becn1  
Ehd1  
Mapk10  
Exoc4  
Cpt1c  
Necab1  
Hdhd2  
Plec  
Eif3e  
Sirt5  
M6pr  
Kcnab2  
Ndufs5  
Tsc2  
Ugp2

Plch2  
Dynl12  
Stmn1  
Sigmar1  
Prkaca  
Nudt3  
Tomm70  
Sptb  
Olfm1  
Slc44a2  
Exoc7  
Septin3  
P4hb  
Hspa8  
Plcl2  
Pgrmc1  
Reep5  
Dusp3  
Gpc4  
Pfkf  
Pitpnb  
Tmem11  
Zfyve1  
Nfasc  
Itsn1  
Agpat1  
Kpna3  
Tnpo3  
Fam162a  
Kifap3  
Pcyox11  
Atg7  
Kif1a  
Mbp  
Ckmt1  
Abl2  
Stk11  
Uchl1  
Adgrb3  
Gripap1  
Ak4  
Exoc6b  
Sdha

Epb4112  
Slc25a51  
Lgals3  
Psmc3  
Eif5a2  
Cycs  
Kcna6  
Nap114  
Nadk2  
Cyb5b  
Mtco2  
Tnik  
Hspe1  
Actr3  
Itpa  
Lasp1  
Acsbg1  
Nme3  
Ciapin1  
Gucy1b1  
Wdfy3  
Cmpk2  
Vti1b  
Htra2  
Czib  
Stx1a  
Pasma6  
Tppp  
Tfam  
Pcsk2  
Serpib5  
Nlgn3  
Dpysl3  
Cxadr  
Ppp1r7  
Acp1  
Bckdk  
Mtch2  
Dars1  
Mtnd1  
Grk2  
Rgs7  
Erc1



Fh  
Ipo7  
Gdpd5  
Rab1b  
Evl  
Apoe  
Cntfr  
Deer1  
Cdc42bpa  
Eps15  
Pdxk  
Pgap1  
Strn  
Agfg1  
Ppp6r2  
Pgp  
Ddhd2  
Fmnl2  
Hspa1a  
Plexd3  
Dnm11  
Acsl5  
Lrrc8b  
Nipsnap1  
Myh10  
Tubb2a  
Dbt  
Armc10  
Vps16  
Ptpre  
NARS1  
Acly  
Ckap5  
Cpne4  
Ppt1  
Ptprij  
Gltp  
Prkce  
Rab35  
Cdk17  
Arhgap44  
Sfxn3  
Samm50

Hgs  
Ica1  
Map2k4  
Lnpk  
Lpgat1  
Atpaf1  
Slc25a44  
Nlgn1  
Upf1  
H2ac12  
Bles03  
Gnai1  
Naxd  
Lrrc4c  
Apmmap  
Gng2  
Hadhb  
Ranbp9  
Creld1  
Pafah1b2  
Cask  
Daam2  
Man2c1  
Syn3  
Atp5me  
Ndufb9  
Etfdh  
Gnpda1  
Acox1  
Osbp18  
Slc7a8  
Gnb2  
Ap3s2  
Grik2  
Fam131b  
Zadh2  
Bpnt1  
Capza1  
Csmd3  
Nectin1  
Map1s  
Rragd  
Ptpa

Alad  
Ppp2r2a  
Rnf14  
Slc23a2  
Atp1b2  
Hmgcl  
S100a11  
Anxa6  
Scrn1  
Srr  
Pemt1  
Ric8a  
Cpnc1  
Rps3  
Sdk2  
Kif5b  
Reps2  
Etf1  
Add2  
S100a14  
Sfn  
G6pd2  
Eif3i  
Atp6v1c1  
Pclo  
Pip4k2a  
Sdhc  
Nudt16  
Vps36  
Tspan7  
Tmx2  
Prdx1  
Tcp1l1l  
Sparc1  
Rab11fip2  
Ppp2r1b  
Rab5b  
Trappc1l  
Ptprr  
Hsph1  
Rock1  
Dhrs1  
Cldnd1

Selenbp2  
Slc25a24  
Acsf2  
Tagln3  
Abcd3  
Lrrtm4  
Ndufaf1  
Anxa1  
Acadl  
Itfg1  
Ttyh1  
Itgb1  
Kctd8  
Rhoc  
Atg9a  
Plpbb  
Pycr2  
Arfgef2  
Clta  
Prpsap1  
Rph3a  
Ccde127  
Myo5b  
Adck1  
Dnaja4  
Clpp  
Nit2  
Anxa1  
Kif17  
Fscn1  
Arf3  
St13  
Flot1  
Slc25a14  
Cse1l  
Fn3k  
Hspa4l  
Cpne6  
Guk1  
Cab39  
Bnip3  
Gatd1  
Ppp1r12a

Adrm1  
Comtd1  
Ftl2  
Ppp2r5a  
Gria4  
Pdk1  
Vwa5a  
Gpi  
Rras2  
Tmod2  
Chl1  
H3c13; H3c14; H3c15; H3c2; H3c3; H3c4; H3c6;  
H3c7  
Sec14l2  
Pcca  
Atp6v0a2  
Cyrib  
Slc17a7  
Dstn  
Lonp1  
Mark3  
Vdac3  
Ppm1b  
Vars1  
Brsk2  
Sdr39u1  
Ddx3y  
Susd2  
Ppp1r21  
Ssr4  
Hspa2  
Ywhaz  
Cdc42ep4  
Cacnb1  
H2az2  
Dgkz  
Dip2a  
Tmed9  
Sncb  
Prune2  
Ddost  
Ddah1  
Atad1  
Mtx2

Vamp3  
Hadha  
Emc3  
Grhpr  
Pacsin1  
Extl2  
Neto1  
Myl9  
Ergic1  
Gclc  
Dgkq  
Dmtn  
Ctnnd1  
Auh  
Trio  
Cntnap4  
Rpl27a  
Mecr  
Ptp4a1  
Tubb5  
Ap3d1  
Pnpla8  
Mal2  
Ralb  
Fam114a2  
Dock4  
Mog  
Ampd2  
Dtna  
Gsk3b  
Rpl15  
Lypla2  
Slc25a12  
Rdh11  
Lamp5  
Vta1  
Rbbp9  
Gna13  
Nucb1  
Mrpl39  
Twf1  
Denr  
Igsf21

Hibch  
Kend2  
Nomo1  
Cdip1  
Vbp1  
Ndufs8  
Gstz1  
Plxna4  
Snx16  
Dnajib11  
Lin7b  
Skp1  
Pkp1  
Fam210a  
Vcam1  
Prdx5  
Vti1a  
Smap2  
Spryd7  
Trim9  
Add1  
Atg3  
Babam2  
Rab4b  
Eno2  
Clasp2  
Hcn1  
Gsdma  
Arhgap26  
Abcb10  
Park7  
Wasf1  
Bcan  
Efhd2  
Nipa1  
Itm2b  
Slc5a7  
Arhgap1  
Dctn4  
Gad2  
Hbb-b2  
Plgrkt  
Map1a

Prkcb  
Pgd  
Cul5  
Hebp1  
Slc4a10  
Ndufa8  
Rragc  
Iba57  
Ubt2  
Phf24  
Acsl1  
Dync1i1  
Slc8a1  
Flad1  
Nwd2  
Gdap11  
Epb411  
Slc9a3r1  
Aldh4a1  
Ppp2cb  
Sars2  
Ppp3cb  
Clvs1  
Syng3  
Rap1b  
Camkk1  
Fbx14  
Eif3j2  
Akr1b1  
Atp8a1  
Gstm3  
Syt1  
Acaa2  
Tsc1  
Phb  
Sirt2  
Agap2  
Psm8  
Psm1  
Itp3  
Jagn1  
Ppp1cc  
Enpp6



Tbrg4  
Nae1  
Slc4a4  
Coasy  
Ubfd1  
Mob4  
Oat  
Huwe1  
Sbf1  
Ddb1  
Pgk1  
Apbb1  
Akr1a1  
Ncam1  
Ccdc6  
Ctnbp2  
Oxr1  
Prkacb  
Hmox2  
Hspbp1  
Ndufs3  
Pex14  
Trim2  
Slc7a14  
Gpx1  
Ola1  
Gpd11  
Mblac2  
Ap2b1  
Gda  
Dmx12  
Etfb  
Clu  
Eif4h  
Ddi2  
H2bc9  
Ufc1  
Stx12  
Ndufb6  
Lhfp14  
Eif4a2  
Prxl2a  
Ttc9

Oscp1  
Faah  
Rhog  
Exoc2  
Prkca  
Mgl1  
Efr3a  
Canx  
Pcd6  
Myh14  
Gfod1  
Coq5  
Slc35f1  
Lrrc47  
Abraxas2  
Ndufa10  
Timm44  
Rmdn3  
Got2  
Kif5c  
Chp1  
Vps45  
Esd  
Tpm1  
Emb  
Dlgap1  
Acap2  
Pdp1  
Eppk1  
Shank1  
Abhd16a  
Rab14  
Bckdha  
Gabbr1  
Eprs1  
Unc5a  
Idh1  
Dlst  
Ly6h  
Uqcr1  
Me2  
Hapln1  
Mtatp8

Gart  
Scn1b  
Snx5  
Ehd4  
Ncam2  
Itm2c  
Cox5b  
Gabra4  
Snap25  
Gfap  
Ptpn  
Cadm2  
Rpl3  
Hsd17b11  
Cntnap1  
Dglucy  
Gmds  
Rps9  
Insrr  
Acot2  
Arpc4  
Pfn2  
Sh3gl3  
Scn2a  
Pgm1  
Csnk2a2  
Fis1  
Prss2  
Fnbp1  
Arf6  
Nrxn1  
Vipas39  
Sptbn1  
Bsg  
Dlg3  
Nptn  
Psmb3  
Efhd1  
Ernm  
Eml2  
Slc1a4  
Camk2g  
Ptpnf

Armc1  
Mif  
Phgdh  
Mrtfb  
Fry  
Nqo2  
Pdia6  
Glx  
Stk39  
Ank3  
Armc6  
Magi2  
Prpf2  
Ralgapa1  
Slc6a7  
Trappc12  
Slc25a1  
Arl3  
Itp2  
Nceh1  
Tmem35a  
Rab2a  
Arhgef9  
Plxna3  
Ndufa3  
Bcs1l  
Chchd3  
Atcay  
Gnao1  
Zmpste24  
H2aw  
Nampt  
Slc2a1  
Inpp1  
Ptpa  
Ccz1  
Gpc1  
Ap3m1  
Faim2  
Aldh9a1  
Ptp4a2  
Atp5f1a  
Stx3

Cep170b  
Atp6v1b2  
Ndufa12  
Eci2  
H2ac7  
Scyl2  
Stx7  
Ctnn  
Stxbp1  
Spart  
Serinc1  
Zc2hc1a  
Lxn  
Oxct1  
Anxa5  
Pygm  
Mtarc2  
Ube2v1  
Sorbs1  
Gapvd1  
Gria3  
Phb2  
Rab1A  
Usp24  
Adsl  
Wdr44  
F3  
Ndufv2  
Ap3b2  
Taok3  
Psm5  
Rab31  
Ipo9  
Psm4  
Bsd1  
Iars2  
Enoph1  
Ndufaf5  
Ranbp1  
Dpysl2  
Cntn2  
Letm1  
Echs1

Mocs3  
Erc2  
Tpp2  
Slc27a4  
Ppp6r3  
Fnbp11  
Coro1c  
Pkp4  
Ggps1  
Gstp1  
Cdc42bpb  
Septin7  
Sccpdh  
Pef1  
Cyb5a  
Frrs11  
Clybl  
Gars1  
Lrrc8a  
Get3  
Bag6  
Kcna1  
Ppme1  
Tubgcp2  
F8a1  
Rab8a  
Shisa9  
Them6  
Pin1  
Fmnl3  
Dock9  
Mcts1  
Slc25a22  
Brec3  
Hspa1b  
Dnajb6  
Nt5c3a  
Tubb2b  
Hk1  
Ptprd  
Lrrtm3  
Psd3  
Kazn

Psmc9  
Scamp3  
Gnai2  
Gspt1  
Numbl  
Nfl  
Ubal1  
Adgr1  
Wwox  
Slc16a1  
Ruvbl1  
Dnajc6  
H4c1; H4c11; H4c12; H4c14; H4c2; H4c3; H4c4;  
H4c6; H4c8; H4c9; H4f16; Hist1h4m  
Usp14  
Prmt5  
Rab21  
Cdh13  
Ipcef1  
Lactb  
Cars1  
Qdpr  
Vcl  
Tufm  
Scrn3  
Fsd11  
Syp  
Enah  
Pdxp  
Rida  
Tmem43  
Prkag1  
Rpl11  
Adgrl3  
Ywhaq  
Atf2  
Sphk2  
Pcdhga4  
Pafah1b1  
Coq9  
Bag5  
Ap3s1  
Rpl12  
Syt12

H2ac15  
 Sco2  
 Usp5  
 Lmtk3  
 Ncald  
 Slc25a40  
 Lamp1  
 Uhrf1bp11  
 Cbr1  
 Aldh2  
 Ywhah  
 Nckipsd  
 Camsap3  
 Actr1b  
 Psmc1  
 Ntm  
 Dnaja1  
 Ganab  
 Slc29a1  
 Cotl1  
 Hist1h2bp  
 Abcb7  
 Ctsb  
 Fdps  
 Tln2  
 Plppr3  
 Rp2  
 Rheb  
 Actr3b  
 Ak3  
 Ahcy12  
 Uchl4  
 Tph2  
 Ckmt2  
 Ap1b1  
 Mpp1  
 Snph  
 Fgf14

Primary Cultured Cell

| Common | Mouse Proteome Residual | DA-FASS Proteome Residual |
|--------|-------------------------|---------------------------|
| Ndufa5 | Sorbs3                  | Rab4a                     |
| Lingo1 | Dcun1d2                 | Abi2                      |
| Nt5dc3 | Usp20                   | Dmxl1                     |



|         |         |         |
|---------|---------|---------|
| Gstm2   | Bbs9    | Clvs2   |
| Stxbp51 | Mon1b   | Ube2l3  |
| Tbc1d24 | Ptgr1   | Ruvbl2  |
| Snap91  | Spock2  | Tmod1   |
| Astn1   | Nav3    | Shroom2 |
| Sarm1   | Dysf    | H2bc3   |
| Smpd3   | Lpxn    | Arpc1a  |
| Ntrk2   | Apobr   | Glde    |
| Slc17a6 | Strbp   | Mcu     |
| Gad1    | Dnahc9  | Gphn    |
| Pmm1    | Ppfibp1 | C2cd4c  |
| Necab2  | Fcrls   | Psma4   |
| Nos1    | Nsg1    | Ppm1e   |
| Adam23  | Irf5    | Mrps22  |
| Camk4   | Myo1b   | Tmed10  |
| Calb2   | Ca13    | Capzb   |
| Gabra1  | Gbp7    | Cyb5r3  |
| Rac3    | C1qtnf4 | Septin9 |
| Vamp2   | Tmed8   | Otub1   |
| Hepacam | Pcdh8   | Syt2    |
| Napb    | Rtkn    | Ppia    |
| Mpp2    | Slc1a4  | Blvrb   |
| Plp1    | Tmem88b | Rap1a   |
| Vcan    | Cdk6    | Hsd17b8 |
| Syn1    | Tlr2    | Sar1b   |
| Doc2a   | Vangl2  | Ak2     |
| Dock3   | Ptprk   | Dctn3   |
| Unc13a  | Kit     | Plppr1  |
| Rab3a   | Ccp110  | Olfm3   |
| Magi1   | Akr1c14 | Ret     |
| Dpp6    | Tap2    | Faf2    |
| Fahd1   | Chd3    | Hsd17b4 |
| Ptprs   | Ganc    | Actn4   |
| Rasgrp2 | Nudt8   | Ppp5c   |
| Cry1l   | Nt5dc1  | Dcc     |
| Gpsm1   | Hbegf   | Rhob    |
| Ppfia3  | Nmi     | Psm11   |
| Arfgef3 | Il6st   | Ermp1   |
| Gria1   | Nid2    | Psph    |
| Mdga2   | Tor3a   | Glo1    |
| Plxna1  | Baz1a   | Tigar   |
| Ttc7b   | FRRS1   | Dhrs7b  |
| Stxbp5  | Dab2    | Slc38a1 |

|          |          |         |
|----------|----------|---------|
| Hbb-b1   | Scpep1   | Gpr3711 |
| Nrxn3    | Arap3    | Trappc3 |
| Efnb3    | Ptpn6    | Tom112  |
| Prickle2 | Tsga10   | Arih1   |
| Zer1     | Bcas1    | Omg     |
| Atp1b1   | Serpib8  | Yars1   |
| Cacna1b  | Aif1     | Gss     |
| Fam171a  |          |         |
| 2        | Plce1    | Impdh2  |
| Kctd16   | Spnb3    | Atp1a1  |
| Dpp10    | Rtn4rl2  | Etfa    |
| Grin2b   | Gpam     | Immt    |
| Cd38     | Trim30a  | Pank4   |
| Gpd1     | Pla2g7   | Tmem33  |
| Cacnb3   | Serpini1 | Tprg11  |
| Mgst3    | Tusc3    | Cend1   |
| Crip2    | Tns3     | Arf2    |
| Stmn3    | Rgs12    | Pithd1  |
| Nrxn2    | Trim67   | Dnajc11 |
| Tanc2    | Pdlim2   | Stk24   |
| Cd81     | Pcgf2    | Vps4b   |
| Ttc9b    | Mrps33   | Rab9b   |
| Trim3    | Pf4      | Slc30a1 |
| Dcun1d3  | Pir      | Prkag2  |
| Wdr47    | Jakmip1  | Stt3a   |
| Crmp1    | Elavl3   | Nrcam   |
| Capn5    | Man2b1   | Vps53   |
| Slc8a2   | Csf2rb   | Krt16   |
| Akap5    | Gm5483   | Lypla1  |
| Cacna2d3 | Fbn1     | Txndc5  |
| Tomm22   | Mt1      | H2az1   |
| Grin1    | Hmgcr    | Ttc39c  |
| Phactr1  | Dhrs11   | Camk1d  |
| Tmem13   |          |         |
| 2a       | Fyb      | Psmf1   |
| Dpysl5   | Sardh    | Letmd1  |
| Itgb2    | Sfrp1    | Cdk5    |
| Gstm7    | Megf8    | Sod2    |
| Abhd6    | Mocos    | Cct2    |
| Nedd41   | Adcy7    | Dlgap3  |
| Shank2   | Pak6     | Idh3g   |
| Cyfp2    | Dcx      | Pick1   |
| Kcnj10   | Atp2b3   | Strn4   |
| Robo2    | Parp3    | Tnpo1   |

|          |               |          |
|----------|---------------|----------|
| Syn2     | Zbp1          | Krt23    |
| Dlg2     | Tab3          | Cox4i1   |
| Cadps    | 9030617003Rik | Atp6v1e1 |
| Cacna2d1 | Mrps17        | Chchd6   |
| Scamp5   | Ctss          | Cds2     |
| Syt5     | Odz4          | Spata21  |
| Acot1    | Afap112       | Spag9    |
| Ppfa2    | Trpc4ap       | Drd1     |
| Tubb3    | Scamp2        | Asap1    |
| Gpm6a    | Pvr11         | Txnrd2   |
| Kcnma1   | Pla2g4a       | Arpc51   |
| Gnb5     | Atat1         | Grid1    |
| Tgm1     | Reln          | Kcnc1    |
| Dock10   | Zfp185;Znf185 | Eef1g    |
| Rab15    | Ehbp111       | Arl8b    |
| Wnk2     | Gjc1          | Cdh11    |
| Lcp1     | Nfkbie        | Rab12    |
| Slc6a9   | Gm5431        | Mindy2   |
| Scn2b    | B2m           | Pfkl     |
| Ndrg4    | Sox10         | Pacsin2  |
| Arg1     | Tmem106a      | Idi1     |
| Ryr2     | Atp8a2        | Sec13    |
| Rims1    | Adamts4       | Ndufs4   |
| Calb1    | Smpd13a       | Ldhb     |
| Chn1     | 41888         | Clint1   |
| Pgm211   | Lonrf2        | Tst      |
| Sh3gl2   | Slc15a2       | Hnrnpk   |
| Mapt     | Ctsa          | Paip1    |
| Palm     | Gpc2          | Nln      |
| At11     | 6430704M03Rik | Stx8     |
| Tubb4a   | Dopey1        | Mdp1     |
| Slc1a3   | Vamp8         | Cystm1   |
| Dclk1    | Myo1f         | Sv2c     |
| Sv2b     | Sox8          | Dcaf7    |
| Ephx1    | Myt11         | Pdia3    |
| Mpp3     | Casp1         | Capns1   |
| Ptpn5    | Tep1          | Scn4b    |
| Fmn11    | Atrnl1        | Cadm4    |
| Plxna2   | Txndc15       | Pi4k2a   |
| Adam22   | Card9         | Aimp1    |
| Scai     | Elavl2        | Gnaq     |
| Rab6b    | Sipa1         | Pip4k2b  |
| Tmem63   |               |          |
| b        | Kcna4         | Cacng4   |

|          |                            |          |
|----------|----------------------------|----------|
| Pde1a    | Igfbp3                     | Ywhae    |
| Nbea     | Edil3                      | Atp6v0a4 |
| Sult4a1  | Crygs                      | Gbe1     |
| Nebi     | Sp4                        | Aida     |
| Mark1    | Arhgap9                    | Sord     |
| Slc32a1  | Nfatc2                     | Macf1    |
| Gprin1   | Cd300lh;OTTMUSG00000003606 | Ctbp2    |
| Pgbd5    | Cyth4                      | Lyst     |
| Svop     | Hmha1                      | Ap1s1    |
| Grin2a   | Avil                       | Bcl2l1   |
| Camk2a   | Fbxo45                     | Rab3gap1 |
| Mag      | Gucy1b3                    | Myo5a    |
| Cacng8   | Hn1                        | Gprc5b   |
| Uqcr10   | Spock3                     | Arc      |
| Atp2b2   | Fcgrt                      | Lta4h    |
| Csmd1    | Lama5                      | Zdhhc5   |
| Gsta4    | Arhgef17                   | Rab11b   |
| Sgsm1    | Lamc1                      | Psmc2    |
| Ass1     | C1qtnf5                    | C1qbp    |
| Rtn1     | Psmb10                     | Cpd      |
| Dgke     | Galnt7                     | Eef2     |
| Gja1     | Smarca1                    | Kcnip4   |
| Lrrc7    | Plcd4                      | H2aj     |
| Eef1a2   | Athl1                      | Ubqln1   |
| Itgam    | Syk                        | Agpat3   |
| Ccdc51   | Lacc1;9030625A04Rik        | Gmfb     |
| Rgs6     | Traf7                      | Iqsec1   |
| Gria2    | Pon3                       | Eef1d    |
| Gabra2   | Fdft1                      | Atp6ap2  |
| Prmt8    | Themis2                    | Nude     |
| Apba1    | Psmb8                      | Ipo5     |
| Prkcg    | 41886                      | Usp46    |
| Dnm3     | Mpg                        | Lrba     |
| Tpm2     | Htatip2                    | Ndufaf2  |
| Cnksr2   | Mllt4                      | Ppp2ca   |
| Rab39b   | Itga1                      | Ocll     |
| Amph     | Rcn3                       | Pi4ka    |
| Nlgn4l   | Sltm                       | Srp54    |
| Nck2     | Prkcdpb                    | Eif2s3x  |
| Elfn2    | E1l2                       | Rock2    |
| Elmod1   | Mrps14                     | Fech     |
| Slc6a17  | Cnn1                       | Crybb1   |
| Il1rap1l | Fam20c                     | Ckb      |

|          |                   |         |
|----------|-------------------|---------|
| Trpv2    | Sdsl              | Atp5pd  |
| Fbxo41   | Fgd2              | Snx7    |
| Slc44a1  | S100a16           | Tpm3    |
| Maob     | Hfe               | Rabggta |
| Plxnc1   | Pard3b            | Emd     |
| Tnr      | Frmpd4            | Eif2s1  |
| Pex5l    | Dhx58             | Ndufb3  |
| Negr1    | Gm98;MRF          | Dab2ip  |
| Arhgap39 | Zbtb7a            | Plcl1   |
| Fibp     | Wdr66             | Wasl    |
| Stmn2    | MacroD2           | Akt3    |
| Ca2      | Cnn3              | Tomm40  |
| Tiam2    | Ptbp3;Rod1        | Cct6a   |
| Atp1a3   | Arhgdib           | Apool   |
| Rap1gap2 | Msr1              | Cpne7   |
| Pde2a    | Tmem179           | Pebp1   |
| Gpm6b    | Palm2;Akap2       | Uba5    |
| Nefm     | Tle1              | Ube2m   |
| Fsd1     | Apbb1ip           | Eef1a1  |
| Epha4    | Tnfaip8           | Ctnna2  |
| Nlgn2    | Osbpl7            | Tbc1d17 |
| Smpd13b  | Phf11l;D14Ert668e | Hba     |
| Cadps2   | Clec12a           | Arl6ip1 |
| Kif5a    | Adcy1             | Cops4   |
| Vsnl1    | Bhlhe22           | Dsg1a   |
| Dbn1     | Rhof              | Hnrnp1  |
| Gap43    | Phlpp2            | Dst     |
| Rapgef4  | Was               | Apeh    |
| Cryab    | Epha5             | Bcat1   |
| Sema7a   | Lppr4             | Tecpr1  |
| Padi2    | Hira              | Mboat7  |
| Brsk1    | Tmem179b          | Ndel1   |
| Sgtb     | Epb4.9;Epb49      | Scamp1  |
| Map2k6   | Mapk8ip1          | Ppm1h   |
| Tppp3    | Sp1               | Ran     |
| Grm3     | Ift27             | Psmc4   |
| Slc12a2  | Parp4             | Cadm1   |
| Sfxn5    | Pyhin1            | Vapb    |
| Kalrn    | Trip10            | Trnt1   |
| Madd     | Arhgap28          | Grm7    |
| Cldn11   | Ltbp1             | Asl     |
| Cacna2d2 | Fat3              | Rundc3a |
| Hspa12a  | Tgfb1             | Acbd6   |

|         |                   |          |
|---------|-------------------|----------|
| Cd200   | Hbb-b1;Beta-s     | Tars2    |
| Camkv   | Tap1              | Coro2b   |
| Ngef    | Col8a1            | Aldh18a1 |
| Prkar2b | Amt               | Grik3    |
| Atp2a3  | Gmip              | Ddx3x    |
| Pde10a  | C1qb              | Slc3a2   |
| Rab3c   | Chga              | H2bc1    |
| Fbxo2   | Loh12cr1          | Crtac1   |
| Camk2b  | Fut9              | Uqcrb    |
| Inpp4a  | Pacsin3           | Ppm1a    |
| Islr2   | Ube2d1            | Hprt1    |
| Ina     | Ftsj1             | Gcdh     |
| Synpo   | Hba-a2;Hba-a1;Hba | Ddah2    |
| Grm2    | Lipa              | Calr     |
| Srcin1  | Noa1              | Mark2    |
| Arl1    | S100a6            | Wasf3    |
| Sipa111 | Cald1             | Mlycd    |
| Scn3b   | Srxn1             | Flii     |
| Ncs1    | H6pd              | Snap29   |
| Aqp4    | Pgm5              | Pls3     |
| Cnr1    | Sh3bp1            | Csnk2b   |
| Bsn     | Cybrd1            | Atic     |
| Actn2   | Tmem50a           | Lrfn4    |
| Oplah   | C4b               | Cdk16    |
| Plcb1   | Csad              | Ppid     |
| Diras2  | Mocs2             | Abhd3    |
| Col1a2  | Nol4              | Slc12a5  |
| Prkar1b | Atp13a2           | Begain   |
| Acot11  | Kcnq2             | Suclg1   |
| Rps6ka2 | Cd109             | Ykt6     |
| Neto2   | Lrrc25            | Dlgap4   |
| Hpcal4  | Tmem123           | Map2     |
| Snca    | Slc38a2           | Xkr4     |
| Nrbp2   | Igsf11            | Scn1a    |
| Glrx5   | Pcdh9             | Acot10   |
| Sv2a    | Amz2              | H2bc14   |
| Pten    | Gtf2h2            | Vps18    |
| Pgls    | Rpusd2            | Sh3glb1  |
| Exog    | Mrfap1            | Vps11    |
| Cntnap2 | Ptgs1             | Actc1    |
| Bdh1    | Mgat1             | Vcp      |
| Ccdc136 | Odz2              | Mthfd11  |
| Arhgef6 | Rabif             | Idh2     |

|         |                 |         |
|---------|-----------------|---------|
| Fxyd6   | P2rx4           | Anxa7   |
| Ptprn2  | Lyz1            | Katnal1 |
| Cacna1a | Illrap          | Selenoi |
| Lamp2   | Igf2bp1         | Purb    |
| L1cam   | Mapk14          | Vps13c  |
| Sorbs2  | Nell2           | Htt     |
| Dlg4    | Ptpn13          | Got1    |
| Stx1b   | Plekho2         | Rpn1    |
| Gnaz    | Cln3            | Tbcel   |
| Cnp     | Arg2            | Atp2a1  |
| Plxnd1  | Plek            | Fasn    |
| Atp2b4  | Cacna1c         | Gprin3  |
| Gstm1   | Ctbs            | Gak     |
| Nefl    | Gsdmdc1         | Psmc6   |
| Phyhip  | Podxl2          | Wfs1    |
| Gdap1   | Ifit1           | Dhodh   |
| Src     | Hspb8           | Pgm2    |
| Tmem163 | Pstpip1         | Ndufs7  |
| Cadm3   | Acox3           | Coq6    |
| Prdx6   | Gmfg            | Sorcs2  |
| Gabbr3  | Afap1           | Acadsb  |
| Mras    | Rbp1            | Hacd3   |
| Sgip1   | Mapksp1;Lamtor3 | Gk2     |
| Necab1  | Ifitm3          | Grm8    |
| Cpt1c   | Fbxo21          | Ndufa9  |
| Sirt5   | Ccdc102a        | Pgs1    |
| Kcnab2  | Tbxas1          | Ppp1cb  |
| Tsc2    | Bckdhb          | Stam    |
| Plch2   | Sema4g          | Pag1    |
| Nfasc   | Cxcl14          | Uchl3   |
| Mbp     | Nagpa           | Osbp11a |
| Ckmt1   | Arap2           | Mrps27  |
| Rin1    | Hk3             | Cacng2  |
| Stx1a   | Iqce            | Lpcat4  |
| Tppp    | Mrc1            | Slc7a5  |
| Pcsk2   | Cd180           | Sort1   |
| Cxadr   | Spock1          | Aprt    |
| Rgs7    | Cd72            | Sh2d5   |
| Cntfr   | Pbxip1          | Eif3j1  |
| Plcx3   | Lrfr1           | Cyc1    |
| Dnm11   | Rnf157          | Septin8 |
| Cpne4   | Cxx1b           | Adrbk2  |
| Gltf    | Alyref2;Refbp2  | Scarb2  |

|          |                        |                        |
|----------|------------------------|------------------------|
| Prkce    | Lcorl                  | Mtmr9                  |
| Ical     | Pla2g6                 | Shmt2                  |
| Lpgat1   | Csf1r                  | Mfsd4a                 |
| Nlgn1    | C530008M17Rik;Kiaa1211 | Dync1li2               |
| Slc25a44 | Fam49a                 | Syt17                  |
| Gnai1    | Dhrs3                  | Pip5k1a                |
| Cask     | Hck                    | Prkab2                 |
| Daam2    | Hspb1                  | Lrpprc                 |
| Syn3     | Tgm2                   | Cpt1a                  |
| Fam131b  | Mast1                  | Atp5f1b                |
| Cacna1e  | Calml4                 | Nudt5                  |
| Add2     | Lrmp                   | Elmo1                  |
| Pclo     | Anpep                  | Arl6ip5                |
| Sdhc     | Tor4a                  | H2ax                   |
| Acsf2    | Cspg4                  | Gga3                   |
| Rhoc     | Ephb2                  | Pld3                   |
| Gls      | Bai3                   | Plppr4                 |
| Rph3a    | Aass                   | Snta1                  |
| Cpne6    | AW551984               | Iqsec2                 |
| Syngap1  | Sema3c                 | Atp5f1c                |
| Ch11     | Erbp4                  | Gdi1                   |
| Brsk2    | Evi2b                  | Tsr2                   |
| Hspa2    | Clk4                   | Atp2a2                 |
| Sncb     | Oas1a                  | Lrrc15                 |
| Prune2   | Sybu                   | Ptpn23                 |
| Grm5     | Syt6                   | Mmut                   |
| Pacsin1  | Mea1                   | Srprb                  |
| Trio     | Itgal                  | Dctn2                  |
| Mog      | Kiaa1045;N28178        | Atp1a2                 |
| Kcnd2    | Rel                    | Acad9                  |
| Plxna4   | Mt3                    | Mapre3                 |
| Arhgap26 | H2-K1                  | Hist2h2aa1; Hist2h2aa2 |
| Adcy5    | Arhgap30               | Ptpn11                 |
| Wasf1    | Thsd7a                 | Ahcy                   |
| Gad2     | Trim5                  | Ndufs2                 |
| Dync1i1  | Sp110                  | Fahd2                  |
| Slc8a1   | Creg1                  | Dsp                    |
| Gdap111  | C5ar1                  | Mtap                   |
| Epb4111  | Xdh                    | Eloc                   |
| Ppp3cb   | Vav1                   | Fcsk                   |
| Clvs1    | Hmox1                  | Adgrl2                 |
| Syng3    | Mrps16                 | Gna11                  |
| Camkk1   | Dock2                  | Krt75                  |



|              |                                                     |           |
|--------------|-----------------------------------------------------|-----------|
| Syt1         | Pcp41l                                              | Hist2h2bb |
| Sirt2        | Dnajc1                                              | Cnrip1    |
| Ppp1r1b      | Dos                                                 | Cacybp    |
| Agap2        | Ablim1                                              | Sirpa     |
| Itpr3        | Myl6b                                               | H3-5      |
| Enpp6        | Gusb                                                | Ndufb11   |
| Slc4a4       | Ifi47                                               | Gsk3a     |
| Mob4         | Lman2l                                              | Gabra5    |
| Ncam1        | Dera                                                | Sgta      |
| Ctnbp2       | Satb2                                               | Rab8b     |
| Trim2        | Pld4                                                | Uggt1     |
| Mblac2       | Alox12l;Alox15                                      | Ppp3ca    |
| Gda          | Gpr84                                               | Gpx4      |
| Dmxl2        | Gadd45gip1                                          | Rptor     |
| Clu          | Acad10                                              | Pof1b     |
| Ttc9         | Reep1                                               | Snap47    |
| Myh14        | AI607873                                            | Atp6v1g2  |
| Kif5c        | Mettl7a1;AB099516;Mettl7a2;Ubie;Me<br>ttl7a2-Higd1c | Syne1     |
| Tpm1         | Arhgap33                                            | Usp9x     |
| Dlgap1       | Lyn                                                 | Timm9     |
| Shank1       | Osbpl6                                              | Ubr4      |
| Gabbr1       | Mmp12                                               | Cox15     |
| Ly6h         | Pawr                                                | Coro1b    |
| Hapln1       | Irg1                                                | Uba1      |
| Gfap         | Phyhd1                                              | Atp6ap1   |
| Snap25       | Lcp2                                                | Calcoco1  |
| Hsd17b1<br>1 | Fam151b                                             | Aldoc     |
| Acot2        | Cygb                                                | Psm8      |
| Ddc          | Btk                                                 | Maip1     |
| Nrxn1        | Timm8a1                                             | Lingo2    |
| Dlg3         | Stard10                                             | Ankrd63   |
| Itpr2        | Slc37a2                                             | Dgkb      |
| Plxna3       | Fam169a                                             | Ubxn6     |
| Atcay        | Ptpn18                                              | Katnb1    |
| Gnao1        | Ifi204                                              | Cdh2      |
| Slc2a1       | Slfn1                                               | Vdac2     |
| Stxbp1       | Wdfy4                                               | Smap1     |
| Zc2hc1a      | Pycard                                              | Anxa2     |
| Sorbs1       | Rbm47                                               | Vps33a    |
| Gria3        | Wdr24                                               | Map6      |
| F3           | Parvb                                               | Pde4d     |
| Erc2         | Rin3                                                | Pptc7     |

|          |               |          |
|----------|---------------|----------|
| Clybl    | Alox5         | Cc2d1a   |
| Fmnl3    | 2310035C23Rik | Aak1     |
| Slc25a22 | D430041D05Rik | Slc25a25 |
| Ptprd    | Pcp4;Igsf5    | Dhrs7    |
| Psd3     | Pvrl3         | Chmp4b   |
| Slc16a1  | Tcirg1        | Vac14    |
| Dnajc6   | Hnrpd1        | Rars2    |
| Fsd11    | Asap2         | Gmppb    |
| Syp      | Tbr1          | Copg2    |
| Pdxp     | Cd59a         | Eif6     |
| Lmtk3    | Pdlim4        | Vamp1    |
| Camsap3  | Slc6a15       | Galk1    |
| Ntm      | Bgn           | Ehd3     |
| Actr3b   | Il16          | Aplp2    |
| Snph     | Phkg2         | Rabgap1  |
|          | Ifih1         | Nsdhl    |
|          | Rims2         | Mthfd1   |
|          | Lyz2          | Slc10a4  |
|          | Efha2         | Ddt      |
|          | Pitpnm2       | Cacnb4   |
|          | Zfp644        | Prrt3    |
|          | Siglec1       | Krt77    |
|          | Arpp21        | Bphl     |
|          | Dhx57         | Psmd5    |
|          | Naip2         | Relch    |
|          | Cd84          | Dpp3     |
|          | Med10         | Pak3     |
|          | Hecw1         | Krt1     |
|          | Ccdc39        | Rab22a   |
|          | Slc2a6        | Rtn3     |
|          | Mcam          | Ggt7     |
|          | Kirrel        | Pgam5    |
|          | Samd9l        | Camk2d   |
|          | Mns1          | Icam5    |
|          | Rab11fip1     | Abi1     |
|          | Nmnat1        | Pygb     |
|          | Tyrobp        | Cpne2    |
|          | Kiaa1841      | Chrm4    |
|          | Rnf213        | Hspa12b  |
|          | Sugp2         | Tenm2    |
|          | Casp8         | Nfs1     |
|          | Gucy1a2       | Pdlim5   |
|          | Actl6b        | Dnaja3   |

|               |                |
|---------------|----------------|
| Tmeff1        | Ndufa2         |
| Kif21b        | Pycr3          |
| Qki;Qk        | Mri1           |
| Lrp2          | Snx30          |
| Samsn1        | Ankrd34b       |
| Slfn5         | Tuba3a; Tuba3b |
| Tapbp         | Shisa4         |
| Ighmbp2       | Cdh10          |
| Cd48          | Aldh112        |
| Spa17         | Csde1          |
| Col11a1       | Arhgap21       |
| Alb           | Acsf3          |
| Scg5          | Acacb          |
| Jam2          | Pak1           |
| Gm4902        | Acad8          |
| Sdc4          | Pdk2           |
| Tlr13         | Naca           |
| Rsph4a        | Pgrmc2         |
| Epha7         | Poldip2        |
| Tmem151b      | Tln1           |
| Nid1          | Epdr1          |
| Gulp1         | Ubqln2         |
| Ankrd40       | Asrgl1         |
| Plod2         | Tsg101         |
| Plcg2         | Cct7           |
| Anks1         | Slc7a10        |
| Map9          | Copb1          |
| Ccdc120       | Fyn            |
| Glce          | Cmtm4          |
| Ctsh          | Kirrel3        |
| Gbp4          | Ca4            |
| Psd           | Slc9a7         |
| Hspg2         | Cops5          |
| Hook1         | Dmwd           |
| Map3k5        | Vat1           |
| Pltp          | Aifm1          |
| Fam38a;Piezo1 | Acta2          |
| Rnasel        | Tmem121b       |
| Slc16a3       | Apoo           |
| Rasgrf2       | Numb           |
| Celf5         | P2ry12         |
| Sash3         | Necap1         |
| Tmem35        | Lman2          |

|              |           |
|--------------|-----------|
| Dvl1         | Adora2a   |
| Mcl1         | Ncstn     |
| Rsph1        | Dtymk     |
| Wdr19        | Rmnd5a    |
| Irgm2        | Grm1      |
| Apc2         | Pik3r1    |
| Mndal        | Pccb      |
| Ksr2         | Fabp5     |
| Plin2        | Pfklp     |
| Tceal5       | Dtd1      |
| Cd63         | Clptm1    |
| Ldlr         | Nisch     |
| Myo9b        | Mpp6      |
| Robo1        | Rcan1     |
| Zfyve9       | Pmpca     |
| Fbl11        | Nt5c      |
| Rilpl2       | Eci1      |
| Flnb         | Galc      |
| Hpgds        | Asah1     |
| Kif6         | Vps50     |
| Plaur        | Stx6      |
| Atp5s        | Afdn      |
| Ncf2         | Eif31     |
| Plxdc1       | Calm2     |
| Emr1         | Me3       |
| Rttm         | Snx4      |
| Lilrb4;Gp49a | Pcyt2     |
| Pde7a        | Ajm1      |
| Man2a1       | Slc2a13   |
| Pcdhga8      | Palm2     |
| Dok1         | Ampd3     |
| Xpr1         | Unc13b    |
| Plau         | Actbl2    |
| Mgat5b       | Rab30     |
| Fbxo11       | Nck1      |
| Fat4         | Plxnb1    |
| Psip1        | Txn11     |
| F13a1        | Nipsnap3b |
| Skap2        | Arfgap1   |
| Snx33        | Snx27     |
| Sulf2        | Atp5md    |
| Rab3il1      | Map2k1    |
| Gna14        | Tubg2     |

|           |           |
|-----------|-----------|
| Bcl11b    | Gsdma3    |
| Znf512b   | Pacs2     |
| Pcyt1b    | Ncan      |
| Ripk1     | Arpc3     |
| Itga4     | Lrrtm2    |
| Chst10    | Cntn4     |
| Sts       | Kctd12    |
| Kiaa1239  | Atp6v1f   |
| Odz1      | Gabrb1    |
| C1qc      | Surf1     |
| Uaca      | Slc25a5   |
| P2rx7     | Micu3     |
| Slc9a9    | Actn1     |
| Dok2      | Kbtbd11   |
| S100a10   | Wdr7      |
| Itih5     | Sdr9c7    |
| Itgb4     | Clcn4     |
| Ptbp2     | Adprs     |
| Trim25    | Rhoa      |
| Marco     | Rtcb      |
| Cybb      | Appl2     |
| Prr3      | Hace1     |
| Rasa4     | Mink1     |
| Ifit3     | Serpina1a |
| Scd2;Scd3 | Acaa1b    |
| BC006779  | Ndrp2     |
| Met       | Dnajb1    |
| Xiap      | Cand1     |
| H2-D1     | Hspa5     |
| Fars2     | Atg5      |
| Spin1     | Abat      |
| Ccrn4l    | Skt       |
| Pdlim1    | Dlgap2    |
| Gvin1     | Strn3     |
| Arhgef4   | Rpl13     |
| Cplx1     | Tuba1a    |
| Epha3     | Slc25a10  |
| Thg11     | Mlst8     |
| Serpina10 | Gps1      |
| Hvcn1     | Psmc3     |
| Ly9       | Gng3      |
| Ncf4      | Ogt       |
| Dock8     | Rabggb    |

|                |          |
|----------------|----------|
| Minpp1         | Prrt2    |
| Notch2         | Slc12a6  |
| Pde4b          | Pdk3     |
| Slc26a11       | G6pdx    |
| Osbpl5         | Cct3     |
| Bin2           | GOLGA7B  |
| Synpo2         | Cndp2    |
| Spp1           | Isoc1    |
| Ndnf           | Adh5     |
| Unc93b1        | Elob     |
| Inpp5d         | C1ql3    |
| Plxnb3         | Cryz     |
| Mt2            | Bcap29   |
| Kiaa0284       | Agpat4   |
| Pdzrn3         | Rmnd1    |
| Arhgap4        | Rars1    |
| Lamb2          | Nptx1    |
| Alkbh8         | Rad23b   |
| Elavl4         | Rab18    |
| Fbn2           | Psmb7    |
| Fam129a        | Ppa2     |
| Hnrnpd         | Txnrd1   |
| Il1rn          | Nccrp1   |
| Dnase2a;Dnase2 | Atp5pb   |
| Leprel1        | Hsd12    |
| Ak7            | Pigs     |
| Slc7a7         | Cacng3   |
| Fabp4          | Mff      |
| Colec12        | Hsp90ab1 |
| Tmem175        | Tomm20   |
| 2410002F23Rik  | Pdha1    |
| Aim2           | Mtor     |
| Raph1          | Bcap31   |
| Irs2           | Arfip2   |
| Saa3           | Tcp1     |
| Tlr7           | Glul     |
| Mtmr7          | Tollip   |
| Ano10          | Gnal     |
| Cav1           | Rab3b    |
| Msl1           | Lrrc4b   |
| Osbp2          | Mtstp6   |
| Rcsd1          | Vcpip1   |
| Afp            | Slc9a1   |

|             |          |
|-------------|----------|
| Ctsc        | Emc1     |
| Cd36        | Arhgap23 |
| Mtif3       | Atp6v1e2 |
| Gpnmb       | Arl8a    |
| Fam108c1    | Tiprl    |
| Rem2        | L2hgdh   |
| Ano8        | Epb4113  |
| Cd99l2      | Chat     |
| Capn7       | Stat1    |
| Ldhd        | Vps26b   |
| Fam134a     | Psma3    |
| Pram1       | Mydgf    |
| Irf8        | Znrd2    |
| Mpeg1       | Vps29    |
| Sparc       | Krt5     |
| Stxbp2      | Dagla    |
| Ptprc       | Vps4a    |
| Cyth2       | Prps1    |
| Elp2        | Ppp2r1a  |
| Tax1bp3     | Nedd4    |
| Slc17a5     | Mrps23   |
| Tagln       | Rps5     |
| Dgkh        | Gspt2    |
| Psd2        | Clip1    |
| Fam107a     | Nudt10   |
| Stap1       | Ndufa6   |
| Fstl1       | Diras1   |
| Palm3       | Sik3     |
| Dctpp1      | Cbr3     |
| Tgtp        | Cyria    |
| Meig1       | Rdx      |
| Clea1;Clea2 | Acot9    |
| Cnn2        | Syng1    |
| Lphn1       | Bcl2l13  |
| Ccdc40      | Sncg     |
| Alox5ap     | Rab27b   |
| Ctnnal1     | Vamp7    |
| Flnc        | Blmh     |
| Stom        | Slc24a4  |
| Lppr3       | Pgm3     |
| Cln5        | Pdcd10   |
| Klhdc10     | Syt3     |
| Slc16a7     | Gpr158   |

|                 |          |
|-----------------|----------|
| Arl4c           | Carm1    |
| Mfi2            | Gsr      |
| Snx32           | Hsd17b10 |
| Hyal2           | Trappc4  |
| Purg            | Kif21a   |
| Slc11a1         | Cdipt    |
| Mrip            | Wipf3    |
| Mef2a           | Fkbp8    |
| Cobll1          | Adgrb1   |
| Cesmst1         | Acs13    |
| Galk2           | Rnf214   |
| Dhdh            | Gas7     |
| Plekha7         | Cntn1    |
| Brf1            | Itgb8    |
| Dusp15          | Abhd17a  |
| Gan             | Ndufc2   |
| Celf4           | Cct6b    |
| Pik3ap1         | Ak1      |
| Ica11           | Xpo7     |
| Prex2           | Git2     |
| Till1           | Ndufb10  |
| Stab1           | Slc25a42 |
| Sin3b           | Shank3   |
| Arhgef10        | Nefh     |
| Xpa             | Mat2b    |
| Rab32           | Aldh1b1  |
| Pak7            | Tjp1     |
| Galns           | Gstp2    |
| Pdgfra          | Cdc37    |
| Kcnj3           | Rgs9     |
| Fmn2            | Cct8     |
| Dynlt3          | Mical3   |
| Fcho1           | Mrs2     |
| Sqrdl           | Ndufb4   |
| Map11c3b;Gm6055 | Hsd17b13 |
| Lbp             | Pdhx     |
| Man2b2          | Mapk8    |
| Fcgr2b          | Aldh1a1  |
| Dtx3l           | Rpn2     |
| Efemp2          | Nt5e     |
| Aif11           | Gapdh    |
| Bbs4            | Eif5a    |
| Parp14          | Aldh1a7  |



|             |                               |
|-------------|-------------------------------|
| Sema6a      | Tgm3                          |
| Khdrbs2     | Ech1                          |
| Ugt8        | Nme2                          |
| Slit1       | Cplx2                         |
| Magi3       | Fam136a                       |
| Prkcq       | Stk32c                        |
| Chd5        | Gfra2                         |
| Cp          | Traf3                         |
| Rbks        | Cyld                          |
| Gtdc1       | Abcb8                         |
| Lgals9      | Akr1b7                        |
| Zfp238      | Lrp1b                         |
| Slc43a2     | Slc1a2                        |
| Cd14        | Hcn2                          |
| Ptrf        | Cox5a                         |
| Wnk3        | Armc8                         |
| Kcnt2;Kent1 | Gucy1a1                       |
| Sez6        | Gdpd1                         |
| Gprasp2     | Tmem143                       |
| Pml         | RTRAF                         |
| Bcl11a      | Rps2                          |
| Ranbp6      | Synj2bp                       |
| Meis2;Meis1 | Rogdi                         |
| Cd40        | Septin11                      |
| Clmp        | Glrx3                         |
| Larp6       | Psemb6                        |
| Faap100     | Hagh                          |
| Ralgps1     | Sucla2                        |
| Adam8       | Cyp46a1                       |
| Slc33a1     | Mdh1                          |
| Yap1        | Mapre2                        |
| Vrk2        | Mapre1                        |
| Wipf1       | Ttyh3                         |
| Gm1568      | Gsdma2                        |
| Nsg2        | Tenm1                         |
| Fermt3      | Cpt2                          |
| Spnb4       | Rimbp2                        |
| Abi3        | Map4                          |
| B3gat3      | Vps35                         |
| Clec7a      | H2bc11; H2bc13; H2bc15; H2bc7 |
| Synm        | Shisa7                        |
| Gemin6      | Hars1                         |
| Txndc17     | Sfxn1                         |

|                      |         |
|----------------------|---------|
| Clec4n;Clec6a        | Commd3  |
| Rnf219               | Cox6c   |
| Ston1                | Cfl2    |
| Dnal1;Dnalc1         | Bin1    |
| Aim1                 | Rap2b   |
| Mcf21                | Sh3glb2 |
| Shroom3              | Srgap2  |
| Ablim3               | Fbxl16  |
| Colla1               | Wars1   |
| Glipr2               | Kif2a   |
| Ncf1                 | H2bc12  |
| Folh1                | Pip5k1c |
| Ttbk1                | Arrb1   |
| Wipf2                | Arhgdia |
| Pald                 | Suclg2  |
| Trex1                | Slc6a11 |
| Chgb                 | Ociad1  |
| Trip6                | Septin5 |
| Med24                | Myo6    |
| Wsb2                 | Epn2    |
| Ifi202               | Ppp2r2c |
| Ccna2                | Timm23  |
| Nadk                 | Cpe     |
| Cep128;4930534B04Rik | Arl15   |
| Rgma                 | Pdyn    |
| Rbfox2;Rbfox1        | Hecw2   |
| Kank1                | Afg3l2  |
| Scn2a1               | Napg    |
| Gucy1a3              | Aifm3   |
| Unc119               | Gapdhs  |
| Epha2                | Ubtd1   |
| Garnl3               | Spr     |
| Aldh1a2              | Ppox    |
| Pvalb                | Actr1a  |
| Trim62               | Paics   |
| Ptpn7                | Irgm1   |
| Cyba                 | Rab11a  |
| Kndc1                | Gnas    |
| Igfbp1               | Jup     |
| Zc3hav1              | Erlin2  |
| Grb10                | Myh9    |
| Wipi2                | Lysmd2  |
| Lgals3bp             | Dap3    |

|              |           |
|--------------|-----------|
| Pdlim7       | Akr1e2    |
| Trp53i11     | Gpsm2     |
| Psmb9        | Prdx3     |
| Ncor1        | Tmem256   |
| Ifit2        | Lanc11    |
| Scube1       | Gde1      |
| Tpcn2        | Fermt2    |
| Zdhhc6       | Slc30a9   |
| Pipox        | Ap2a1     |
| Rac2         | Ppp2r5c   |
| Adamts5      | Adss2     |
| Ccdc88b      | Ntng2     |
| Ccdc92       | Smyd5     |
| Klhdc2       | Ppp6c     |
| Grn          | Adprh     |
| Ap1s2        | Mfsd6     |
| Pars2        | Prkar2a   |
| Dtx3         | Slc6a6    |
| Hp           | Ndufaf3   |
| Fbln2        | Coa3      |
| Gpsm3        | My112b    |
| Clstn3       | Hnrnpa2b1 |
| Nbeal2       | Rab33b    |
| Irak4        | Gabra3    |
| H2-Ke2;Pfdn6 | Acp6      |
| Mgst1        | Rack1     |
| Sp100        | Cops3     |
| Aes          | Zzef1     |
| Igfbp2       | Lap3      |
| Adipoq       | Acyp1     |
| Milr1        | Capn1     |
| Igsf3        | Psm14     |
| Echdc3       | D1Pas1    |
| Scg2         | Chordc1   |
| Tgfbr2       | Stoml2    |
| Naga         | Rps6ka1   |
| Cd86         | Krt13     |
| Steap4       | Tomm401   |
| Slc25a18     | Cpne8     |
| Snx11        | Hpcal1    |
| Cpq          | Ap1m2     |
| Ttc3         | Arf5      |
| Gprin2       | Ndufb7    |

Cd68  
Serpib2  
Zfp334  
Trim46  
Sppl2a  
Stfa3  
2700081O15Rik  
Nckap11  
Ube2e3;Ube2e2  
Lpcat2  
Aagab  
Grip2  
Mphosph6  
Def6  
Folr1  
Plekhg1  
Enc1  
Enpp2  
Lilrb3  
Rltpr  
Cav2  
Morn4  
Bcor  
Tlr8  
Ecel1

Nckap1  
C2cd5  
Acat1  
Grb2  
Coa7  
Tpi1  
Hnrnp2  
Mpc2  
Krt80  
Smcr8  
Dsg1b  
Tsn  
Ap2s1  
Iglon5  
Kpnb1  
Btbd17  
Ahsa1  
Oga  
Lrrtm1  
Pip4p2  
Ntrk3  
Atp6v1h  
Rhot2  
Slc2a3  
Krt12  
Fth1  
Pkm  
Mapk1  
Cmpk1  
Cops8  
Krt6a  
Hist1h2af  
Arhgef12  
Aldh3a2  
Rgs20  
Pdia4  
Stxbp3  
Ttc1  
Nfu1  
Hspa9  
Fbxo3  
Tpd52  
Gmppa

Clic4  
Prep  
Atg2b  
Psmc6  
Ccde177  
Rab24  
Rnf141  
Ipo4  
Abr  
Cdk14  
Slc25a20  
Dnaja2  
Cnm1  
Psmc7  
Ppp6r1  
Atp6v1g1  
Sod1  
Pitrm1  
Dbnl  
Ppp1ca  
Tmem9b  
Msn  
Adam11  
Dnajb4  
Nipsnap2  
Mtco1  
Rab5a  
Gabrg2  
Picalm  
Pura  
Irgq  
Fam177a1  
Osbp12  
Dpysl4  
Vdac1  
Gpd2  
Psmc5  
Exoc5  
Dctn1  
Flna  
Mfn2  
Ptges3  
Tenm3

Mccc2  
Tmx1  
Alg2  
Pgam1  
Hspd1  
Chmp1a  
Gmps  
Ctnnd2  
Sorcs3  
Smap  
Soga3  
Wbp2  
Msra  
Isyna1  
Sri  
Ddx1  
Stim1  
Flrt3  
Tpbg  
Grik5  
Uchl5  
Pitpna  
Mlc1  
Itpka  
Fgf12  
Ak5  
Echdc1  
Setd7  
Babam1  
Akap12  
Glod4  
Rps6ka3  
Kif1b  
Dync1h1  
Stum  
Timm13  
Mtmr2  
Mtfp1  
Uqcrq  
Sec23a  
Rap2a  
Vps25  
Ezr

Plaa  
Dync1li1  
Nap111  
Lin7a  
Abhd10  
Taok1  
Tm9sf3  
Rps13  
Prnp  
Ctsd  
Tesc  
Grpel1  
Wdr48  
Cox6b1  
Actg2  
Usp7  
Eea1  
Camkk2  
Acat2  
Brinp1  
Tkt  
Uso1  
Trim32  
Gdi2  
Pdpk1  
Mrpl12  
Atp5f1d  
Scfd1  
Cd47  
Ndufs1  
Cul2  
Crat  
Vps13a  
Timm29  
Akr7a2  
Ckap4  
Clip2  
Slc18a3  
Krt4  
Epb41  
Atp5mg  
Ptpn9  
Acaca

Psm13  
Mtmr1  
Cny  
Coq3  
Sar1a  
Cisd1  
Dctn5  
Vapa  
Agk  
Tubg1  
Pip4k2c  
Exoc8  
Thsn1  
Git1  
Cdc42  
Acl6  
Gst1  
Opa1  
Vps33b  
Sec61a1  
Slc25a3  
Ctbp1  
Prune1  
Erp44  
Hsp90aa1  
App1  
Clcn6  
Cat  
Clcn3  
Arpc2  
Get4  
Cpne3  
Ndr3  
Slc25a4  
Pnp  
Dip2b  
Ptk2  
Psm2  
Lrpap1  
Sh3gl1  
Chkb  
Fabp3  
Marchf5



Olfm2  
Dlg1  
Pgam2  
Cops7a  
Gba  
Cryz11  
Csrp1  
Septin2  
Them4  
Slc6a1  
Kcnt1  
Mat2a  
Retreg2  
Gnb1  
Aldh8a1  
Rala  
Ndufs6  
Lmna  
Clic1  
Impact  
Ptges2  
Pak2  
Myl6  
Copb2  
Tmem30a  
Hint1  
Cltc  
Tpd52l2  
Psat1  
Ywhab  
Ptrh2  
Capn2  
Timm50  
Ide  
Hdhd3  
Lmtk2  
Fkbp1a  
Srm  
Ube2n  
Nsf11c  
Cyfip1  
Mlec  
Slc12a9

Ahcy11  
Thop1  
Cit  
Sec31a  
Anxa3  
Ctnnb1  
Impa1  
Farp1  
Aldh111  
Pitpnc1  
Jam3  
Acvr1b  
Csnk1e  
Plpp3  
Eif4e  
Vkorc111  
Ddx19a  
Adk  
Acta1  
Trap1  
Pcbp1  
Sdhb  
Ncln  
Mtpn  
Sptan1  
Selenbp1  
Aldh5a1  
Sugt1  
Krt10  
Tpt1  
H2bc4; H2bc6; H2bc8  
Plxnb2  
Osbp  
Hint2  
Acadm  
Hint3  
Cyp2s1  
Pabpc1  
Igbp1  
Gnl1  
Nagk  
Vps26a  
Bcas3

Ssr1  
Gpr52  
Dlat  
Micu1  
Pacs1  
Strap  
Rab3gap2  
Inpp5a  
Srpk2  
Dgki  
Mtnd4  
Iqsec3  
H3-3a; H3-3b  
Gba2  
Arcn1  
Psm2  
Arfgef1  
Lancl2  
Ttpal  
Unc13c  
Sh3kbp1  
Mmab  
Aldh7a1  
Slk  
Wdr45  
Lgalsl  
Dnpep  
Nit1  
Bcr  
Dld  
Plscr3  
Mtx1  
Ggct  
Ndr1  
Tab1  
Eps15l1  
Cyb5r1  
Eipr1  
Slc1a6  
Lrrc57  
Krt79  
Prpsap2  
Iqcb1

Atp6v0a1  
Lrp1  
Gabrb2  
Stx16  
Bmerb1  
Serpib6  
Dsg1c  
Tagln2  
Xpo1  
Ist1  
Baiap2  
Coro1a  
Arf1  
Scol  
Rnh1  
Calm13  
Mrps31  
Hadh  
Bmpr2  
Atad3  
Epm2aip1  
Atp5fle  
Atp6v1d  
Pepd  
Pcbp2  
Pafah1b3  
Stx4  
Pdpr  
Septin4  
Ppa1  
Nme1  
Abcg2  
Slc25a11  
Ap2m1  
Pdhb  
Lmbrd2  
Rftn2  
Ndufb8  
Acadv1  
Snx2  
Uqcc1  
Add3  
Caskin1

Wdr54  
Synrg  
Mtf11  
Cf11  
Uqrc2  
Tmem65  
C2cd21  
Tmx4  
Hpca  
Acaa1a  
Uqcrfs1  
Asphd2  
Itp1  
Psmc2  
Atp2b1  
Ppib  
Gabarapl2  
Naxe  
Pitpnm1  
Pik3c3  
Hal  
Dynl1  
Rad23a  
Mdh2  
Adcy9  
Ntng1  
Rtn4  
Cep170  
Fhl1  
Abcb9  
Afg3l1  
Mccc1  
Capza2  
Hars2  
Blvra  
Sacm11  
Gfm1  
Rcn2  
Pls1  
Erp29  
Prdx2  
Lysmd1  
Cops6

Ube2k  
Slc7a2  
Atp9a  
Marcks  
Hsd1l  
Pmpcb  
Rnpep  
Gpr88  
Epn1  
Atp1b3  
Strip2  
Psmc1  
Mapk8ip3  
Tenm4  
Rap1gap  
Sdhc  
Crkl  
Map1b  
H3c1; H3c10; H3c11; H3c8  
Prmt1  
Por  
Kcna2  
Sars1  
Septin6  
Opa3  
Ndufa7  
Lamtor1  
Aspa  
Rasl2-9  
Scp2  
Nol3  
Krt8  
Rpsa  
Mapk3  
Vgf  
Lrtm2  
Pde1b  
Dync1i2  
Rab9a  
Hsp90b1  
Tbc1  
Ap2a2  
Cbr4

Dnajc5  
Cap1  
Hk2  
Stub1  
Ptc3  
Srgap3  
Rab5c  
Gk  
Cspg5  
Ppp3r1  
Rab6a  
Ogdh  
Reps1  
Lgi1  
Igsf8  
Arf4  
Rplp0  
Pcyox1  
Ivd  
Rabgef1  
Gstk1  
Anks1b  
Itgav  
Atp5po  
Tsfm  
Pik3r4  
Agap3  
Dhrs4  
Araf  
Ncdn  
Vim  
Rabep1  
Prodh  
Tamm41  
Pcd6ip  
Aloxe3  
Slc38a3  
Lzts3  
Pck2  
Flot2  
Tuba4a  
Gnai3  
Slc4a3

Emc2  
Psmb1  
Synpr  
Tmx3  
Efr3b  
Rhot1  
Nsf  
Hyou1  
Agap1  
Psmb5  
Cpm  
Daam1  
Dtnb  
Tm9sf2  
Atg16l1  
Wdr77  
Rab10  
Aars1  
Twf2  
Slc25a13  
Prkar1a  
Idh3a  
Dnajb2  
Gch1  
Ryr3  
Arhgef7  
Kiaa1549  
Prxl2b  
Ftl1  
Synj1  
Eif4b  
Aco1  
Fam126b  
Taldo1  
Aco2  
Maoa  
Map1lc3a  
Hspa4  
Asic1  
Slc30a3  
Cct4  
Vps51  
Gstm5



Slc22a23  
Timmde1  
Rab23  
Ado  
Glud1  
Ndufv1  
Abhd12  
Psmc7  
Cs  
Ephx2  
S1pr1  
Ap1g2  
Chrb2  
Slc25a23  
Cad  
Actb  
Rab7a  
Pam  
Eno1  
Prmt1  
Actr2  
Aldoa  
Krt72  
Lin7c  
Ap3b1  
Acot7  
Klc2  
Mtch1  
Pip5k1b  
Phyhl1  
Acy6  
Slc4a8  
Rac1  
Heatr5b  
Tom1  
Mpi  
Actr10  
Adam10  
Wdr1  
Spg7  
Thy1  
Akap7  
Nptxr

Myo18a  
Ndufa13  
Vat11  
Ache  
Npepps  
Entpd2  
Arl2  
Wdr37  
Agpat5  
Tpd5211  
Myadm  
Ndufa4  
Krt26  
Osbp110  
Hibadh  
Psmb4  
Cpne9  
Eef1b  
Aplg1  
Hccs  
Memo1  
Tfrc  
Ank2  
Alcam  
Plcg1  
Anxa4  
Ap3m2  
Snx1  
Ap1m1  
Usp15  
Eci3  
Eml5  
Tars1  
Kiaa0513  
Ragef2  
Ube2v2  
Mpst  
Klc1  
Spcs2  
Gmpr  
Cops2  
Kcnj4  
Sec22b

Arhgap32  
Csnk2a1  
Psm1  
Gatd3a  
Ube2o  
Prkd  
Hip1  
Plcd1  
Pfn1  
Ube3a  
Stip1  
Elmo2  
App  
Ndufa11  
Ldha  
Dennd11  
Atp6v1a  
Celsr2  
Cul1  
Gabbr2  
Psm12  
Ppm1f  
Prkesh  
Hexb  
Tmem126a  
Eif4a1  
Ppp1r9b  
Napa  
Dynlrb1  
H2ac20  
Atp5mf  
Cct5  
Cul3  
Exoc3  
Ywhag  
Ndufb5  
Fah  
Vps52  
Basp1  
Hip1r  
Rufy3  
Cap2  
Hsd17b12

Nif3l1  
Lsamp  
Dad1  
Glg1  
Snx6  
Syt7  
Mtn2  
Gnb4  
Rcn1  
Avl9  
Cltb  
Ppp2r5e  
Elmod2  
Aldh6a1  
Fundc2  
Fkbp4  
Slc25a46  
Oxsr1  
Tbcd  
Vwa8  
Eif5  
Arpc5  
Trappc9  
Endod1  
Rdh14  
Me1  
Pc  
Gaa  
Gsn  
Neo1  
Gng7  
Crk  
Atp6v0d1  
Xpnpep1  
Mt-Cyb  
Nans  
Tdrkh  
Wdr13  
Csnk1a1  
Mapk10  
Becl1  
Ehd1  
Exoc4

Plec  
Hdhd2  
Eif3e  
M6pr  
Ndufs5  
Ugp2  
Dynll2  
Stmn1  
Sigmar1  
Prkaca  
Nudt3  
Tomm70  
Sptb  
Olfm1  
Slc44a2  
Exoc7  
Septin3  
P4hb  
Hspa8  
Plcl2  
Pgrmc1  
Reep5  
Dusp3  
Pfkf  
Gpc4  
Pitpnb  
Ablim2  
Tmem11  
Zfyve1  
Itsn1  
Agpat1  
Kpna3  
Tnpo3  
Pcyox11  
Kifap3  
Fam162a  
Kif1a  
Atg7  
Abl2  
Stk11  
Uchl1  
Adgrb3  
Gripap1

Rgs14  
Ak4  
Exoc6b  
Sdha  
Epb4112  
Slc25a51  
Lgals3  
Psm3  
Eif5a2  
Nap114  
Kcna6  
Cycs  
Nadk2  
Mtco2  
Cyb5b  
Tnik  
Hspe1  
Lasp1  
Itpa  
Actr3  
Nme3  
Acsbg1  
Gucy1b1  
Ciapin1  
Wdfy3  
Cmpk2  
Vti1b  
Htra2  
Czib  
Psm6  
Tfam  
Serpib5  
Nlgn3  
Dpysl3  
Ppp1r7  
Acp1  
Bckdk  
Mtch2  
Dars1  
Mtnd1  
Grk2  
Erc1  
Fh

Ipo7  
Ptk2b  
Rab1b  
Gdpd5  
Evl  
Apoe  
Decr1  
Pdxk  
Cdc42bpa  
Eps15  
Pgap1  
Strn  
Agfg1  
Ppp6r2  
Pgp  
Dhd2  
Fmnl2  
Hspa1a  
Acsl5  
Lrrc8b  
Nipsnap1  
Myh10  
Tubb2a  
Dbt  
Armc10  
Vps16  
Ptpre  
NARS1  
Acly  
Ckap5  
Ptrj  
Ppt1  
Krt17  
Rab35  
Arhgap44  
Cdk17  
Sfxn3  
Samm50  
Hgs  
Map2k4  
Lnpk  
Atpaf1  
Upf1

H2ac12  
Bles03  
Naxd  
Lrrc4c  
Apmmap  
Gng2  
Hadhb  
Ranbp9  
Creld1  
Pafah1b2  
Man2c1  
Atp5me  
Ndufb9  
Gabrd  
Etfdh  
Gnpda1  
Ospl8  
Acox1  
Slc7a8  
Gnb2  
Grik2  
Ap3s2  
Zadh2  
Bpnt1  
Capza1  
Csmc3  
Nectin1  
Map1s  
Rragd  
Ptpa  
Alad  
Ppp2r2a  
Rnf14  
Slc23a2  
Atp1b2  
Hmgcl  
S100a11  
Anxa6  
Scrn1  
Srr  
Pcmt1  
Ric8a  
Cpne1



Rps3  
Sdk2  
Kif5b  
Reps2  
Etf1  
S100a14  
Sfn  
Eif3i  
G6pd2  
Atp6v1c1  
Pip4k2a  
Nudt16  
Vps36  
Tspan7  
Tmx2  
Prdx1  
Tcp1111  
Sparc1  
Rab11fip2  
Ppp2r1b  
Rab5b  
Trappc11  
Dnm1  
Ptprr  
Hsph1  
Rock1  
Cldnd1  
Dhrs1  
Selenbp2  
Slc25a24  
Tagln3  
Lrrtm4  
Abcd3  
Ndufaf1  
Itfg1  
Acadl  
Anxa1  
Ttyh1  
Itgb1  
Kctd8  
Plpbp  
Atg9a  
Pycr2

Arfgef2  
Clta  
Prpsap1  
Myo5b  
Ccde127  
Adck1  
Dnaja4  
Clpp  
Nit2  
Kif17  
Anxa11  
Arf3  
Fscn1  
St13  
Flot1  
Slc25a14  
Cse11  
Fn3k  
Hspa41  
Guk1  
Slc6a3  
Cab39  
Ppp1r12a  
Bnip3  
Gatd1  
Adrm1  
Comtd1  
Ftl2  
Ppp2r5a  
Pdk1  
Gria4  
Vwa5a  
Gpi  
Rras2  
Tmod2  
H3c13; H3c14; H3c15; H3c2; H3c3; H3c4; H3c6;  
H3c7  
Sec14l2  
Pcca  
Atp6v0a2  
Cyrib  
Slc17a7  
Mark3  
Lonp1

Dstn  
Vdac3  
Ppm1b  
Vars1  
Sdr39u1  
Ddx3y  
Susd2  
Ppp1r21  
Ssr4  
Ywhaz  
H2az2  
Cacnb1  
Cdc42ep4  
Dgkz  
Dip2a  
Tmed9  
Ddost  
Atad1  
Ddah1  
Mtx2  
Vamp3  
Hadha  
Emc3  
Grhpr  
Neto1  
Extl2  
Myl9  
Ergic1  
Gclc  
Dgkq  
Dmtn  
Ctnnd1  
Auh  
Gsg1l  
Cntnap4  
Rpl27a  
Mecr  
Ptp4a1  
Tubb5  
Pnpla8  
Ap3d1  
Mal2  
Ralb

Dock4  
Fam114a2  
Ampd2  
Dtna  
Gsk3b  
Rpl15  
Lypla2  
Slc25a12  
Rdh11  
Lamp5  
Vta1  
Th  
Rbbp9  
Gna13  
Nucb1  
Mrpl39  
Twf1  
Igsf21  
Denr  
Hibch  
Nomo1  
Cdip1  
Vbp1  
Ndufs8  
Gstz1  
Snx16  
Dnajb11  
Lin7b  
Skp1  
Pkp1  
Fam210a  
Vcam1  
Prdx5  
Vti1a  
Smap2  
Spryd7  
Trim9  
Add1  
Atg3  
Rab4b  
Babam2  
Hcn1  
Clasp2

Eno2  
Gsdma  
Park7  
Abcb10  
Bcan  
Nipa1  
Efhd2  
Itm2b  
Slc5a7  
Arhgap1  
Dctn4  
Hbb-b2  
Plgrkt  
Prkcb  
Map1a  
Pgd  
Cul5  
Hebp1  
Slc4a10  
Ndufa8  
Rragc  
Iba57  
Ubt2  
Phf24  
Acs1  
Flad1  
Nwd2  
Slc9a3r1  
Ppp2cb  
Aldh4a1  
Sars2  
Rap1b  
Fbx14  
Akr1b1  
Eif3j2  
Gstm3  
Atp8a1  
Acaa2  
Tsc1  
Phb  
Psm8  
Psm1  
Jagn1

Ppp1cc  
Tbrg4  
Nae1  
Coasy  
Slc18a2  
Ubfd1  
Oat  
Huwe1  
Sbf1  
Pgk1  
Ddb1  
Apbb1  
Akr1a1  
Ccdc6  
Oxr1  
Prkacb  
Pex14  
Ndufs3  
Hspbp1  
Hmox2  
Slc7a14  
Gpx1  
Ola1  
Gpd1l  
Ap2b1  
Etfb  
Ddi2  
Eif4h  
H2bc9  
Ufc1  
Stx12  
Ndufb6  
Lhfp14  
Prx12a  
Eif4a2  
Oscp1  
Faah  
Rhog  
Prkca  
Exoc2  
Mgl1  
Canx  
Efr3a

Pdcd6  
Gfod1  
Coq5  
Slc35f1  
Lrrc47  
Ndufa10  
Abraxas2  
Timm44  
Rmdn3  
Got2  
Chp1  
Vps45  
Kcnip2  
Esd  
Pdp1  
Acap2  
Emb  
Eppk1  
Rab14  
Abhd16a  
Bckdha  
Rgs8  
Krt42  
Eprs1  
Unc5a  
Idh1  
Dlst  
Uqcr1  
Me2  
Mtatp8  
Gart  
Scn1b  
Snx5  
Ncam2  
Ehd4  
Itm2c  
Cox5b  
Gabra4  
Ptpn  
Cadm2  
Rpl3  
Cntnap1  
Kcnab1

Gmcs  
Dglucy  
Rps9  
Insrr  
Arpc4  
Pfn2  
Sh3gl3  
Scn2a  
Pgm1  
Csnk2a2  
Fis1  
Prss2  
Arf6  
Fnbp1  
Cpne5  
Vipas39  
Sptbn1  
Bsg  
Psmb3  
Nptn  
Efhd1  
Ernm  
Eml2  
Slc1a4  
Ptpf  
Camk2g  
Armc1  
Mif  
Phgdh  
Mrtfb  
Fry  
Pdia6  
Nqo2  
Glx  
Stk39  
Ank3  
Armc6  
Magi2  
Prpf2  
Ralgapa1  
Crym  
Slc6a7  
Trappc12



Slc25a1  
Arl3  
Nceh1  
Tmem35a  
Rab2a  
Arhgef9  
Ndufa3  
Bcs1l  
Chchd3  
Zmpste24  
H2aw  
Nampt  
Ptpa  
Inpp1  
Gpc1  
Ccz1  
Ap3m1  
Aldh9a1  
Faim2  
Ptp4a2  
Atp5f1a  
Stx3  
Cep170b  
Atp6v1b2  
Ndufa12  
H2ac7  
Eci2  
Scyl2  
Stx7  
Ctnn  
Spart  
Serinc1  
Lxn  
Oxct1  
Anxa5  
Pygm  
Mtarc2  
Krt14  
Ube2v1  
Phb2  
Gapvd1  
Rab1A  
Usp24

Adsl  
Wdr44  
Ndufv2  
Ap3b2  
Taok3  
Psm5  
Rab31  
Psm4  
Ipo9  
Rasa1  
Iars2  
Bsd1  
Ndufa5  
Enoph1  
Ranbp1  
Cntn2  
Dpysl2  
Letm1  
Mocs3  
Echs1  
Tpp2  
Slc27a4  
Ppp6r3  
Fnbp1  
Coro1c  
Pkp4  
Gstp1  
Ggps1  
Cdc42bpb  
Septin7  
Sccpdh  
Pef1  
Cyb5a  
Frrs1  
Lrrc8a  
Gars1  
Get3  
Ppme1  
Kcna1  
Bag6  
Tubgcp2  
F8a1  
Rab8a

Shisa9

Them6

Pin1

Dock9

Mcts1

Hspa1b

Brcc3

Dnajb6

Nt5c3a

Tubb2b

Hk1

Krt76

Lrrtm3

Kazn

Psmc9

Scamp3

Numbl

Gspt1

Gnai2

Nf1

Uba1y

Adgrl1

Wwox

Ruvbl1

H4c1; H4c11; H4c12; H4c14; H4c2; H4c3; H4c4;  
H4c6; H4c8; H4c9; H4f16; Hist1h4m

Usp14

Prmt5

Rab21

Cdh13

Ipcef1

Lactb

Qdpr

Cars1

Vcl

Tufm

Scrn3

Enah

Rida

Homer1

Tmem43

Prkag1

Rpl11

Adgrl3

Ywhaq  
Atf2  
Sphk2  
Pcdhga4  
Pafah1b1  
Bag5  
Coq9  
Ap3s1  
Rpl12  
Syt12  
H2ac15  
Sco2  
Usp5  
Ncald  
Slc25a40  
Lamp1  
Uhrf1bp11  
Aldh2  
Cbr1  
Ywhah  
Nckipsd  
Actr1b  
Psmc1  
Dnaja1  
Ganab  
Slc29a1  
Cotl1  
Hist1h2bp  
Abcb7  
Ctsb  
Fdps  
Tln2  
Plppr3  
Rp2  
Rheb  
Ak3  
Ahcyl2  
Uchl4  
Tph2  
Ckmt2  
Mpp1  
Ap1b1  
Fgf14

**Supplementary Table 5: Proteomics Comparison With KEGG Neurotransmission Pathways**

| Synaptic Vesicle Cycling |                                                               |
|--------------------------|---------------------------------------------------------------|
| Pre-synapse              |                                                               |
| KEGG Name                | Associated Genes                                              |
| Transporters             | Slc32a1 Slc18a1/2/3/ Slc17a6/7/8                              |
| Transporters             | Slc1a1/2/3/6/7 Slc6a1/2/3/4/5/7/9/11/12/13                    |
| SYT                      | Syt1                                                          |
| VAMP                     | Vamp2                                                         |
| Rab3A                    | Rab3a                                                         |
| RIM                      | Rims                                                          |
| Munc18                   | Stxbp1                                                        |
| Munc13                   | Unc13a/b/c                                                    |
| Syntaxin                 | Stx1a/b/2/3                                                   |
| SNAP25                   | Snap25                                                        |
| Complexin                | Cplx1/2/3/4                                                   |
| VGCC                     | Cacna1a/b                                                     |
| NSF                      | Nsf                                                           |
| alpha-SNAP               | Napa                                                          |
| Dyna                     | Dmn1/2/3                                                      |
| AP2                      | Ap2a1/2/b1/m1/s1                                              |
| Clathrin                 | Clta/b/c/c11                                                  |
| vATPase                  | Atp6v1a/b1/b2/c2/c1/d/e2/e1/f/g1/g3/g2 Atp6v0e1/2             |
| SYN                      | Syn1/2/3                                                      |
| Glutamatergic Synapse    |                                                               |
| Pre-synapse              |                                                               |
| KEGG Name                | Gene Name                                                     |
| mGluR2/3                 | Grm2/3                                                        |
| mGluR4/8                 | Grm4/8                                                        |
| GLNT                     | Slc38a1/2                                                     |
| GLS                      | Gls/2                                                         |
| GRK                      | Grk2/3                                                        |
| AC                       | Adcy1/2/3/4/5/6/7/8/9                                         |
| Gi/o                     | Gnai1/2/3 Gnao1 Gnb1/2/3/4 Gng2/3/4/5/7/8/10/11/12/13 Gngt1/2 |
| PKA                      | Prkaca/b/g                                                    |
| VGLUT                    | Slc17a6/7/8                                                   |
| mGluR7                   | Grm7                                                          |
| GIRK                     | Kcnj3                                                         |
| KA                       | Grik1/2/3/4/5                                                 |
| VGCC                     | Cacna1a                                                       |
| EAAT                     | Slc1a2/7                                                      |
| Post-synapse             |                                                               |

| KEGG Name         | Gene Name                                                                    |
|-------------------|------------------------------------------------------------------------------|
| KA                | Grik1/2/3/4/5                                                                |
| AMPA              | Gria1/2/3/4                                                                  |
| EAAT              | Slc1a1/6                                                                     |
| VGCC              | Cacna1c/d                                                                    |
| NMDAR             | Grin1/2a/2b/2c/2d/3a/3b                                                      |
| PLA2              | Pla2g4a/b/c/d/e/f Jmjd7-Pla2g4b                                              |
| PLD               | Pld1/2                                                                       |
| ERK1/2            | Mapk1/3                                                                      |
| PKC               | Prkca/b/g                                                                    |
| PKA               | Prkaca/b/g                                                                   |
| IP3R              | Itpr1/2/3                                                                    |
| PLC               | Plcb1/2/3/4                                                                  |
| Homer             | Homer1/2/3                                                                   |
| PP2B              | Ppp3ca/cb/cc/r1/r2                                                           |
| Gi/Go             | Gnai1/2/3 Gnao1                                                              |
| AC                | Adcy1/2/3/4/5/6/7/8/9                                                        |
| Gs                | Gnas                                                                         |
| Gq                | Gnaq                                                                         |
| SHANK             | Shank1/2/3                                                                   |
| GKAP              | Dlgap1                                                                       |
| PSD95             | Dlg4                                                                         |
| TRPC1             | Trpc1                                                                        |
| mGluR1/5          | Grm1/5                                                                       |
| mGluR2/3          | Grm2/3                                                                       |
| mGluR4/6          | Grm4/6                                                                       |
| mGluR7/8          | Grm7/8                                                                       |
| GABAergic Synapse |                                                                              |
| Pre-synapse       |                                                                              |
| KEGG Name         | Gene Name                                                                    |
| GLS               | Gls/2                                                                        |
| SystemA           | Slc38a1/2                                                                    |
| GAD               | Gad1/2                                                                       |
| VIAAT             | Slc32a1                                                                      |
| GABA-T            | Abat                                                                         |
| AC                | Adcy1/2/3/4/5/6/7/8/9                                                        |
| Gi/o              | Gnai1/2/3 Gnao1      Gnb1/2/3/4      Gng2/3/4/5/7/8/10/11/12/13      Gngt1/2 |
| PKA               | Prkaca/b/g                                                                   |
| VGCC              | Cacna1a/b                                                                    |
| GAT               | Slc6a1/11/12/13                                                              |
| GABAB             | Gabbr1/2                                                                     |
| Post-synapse      |                                                                              |
| KEGG Name         | Gene Name                                                                    |

| GABAA               | Gabra1/2/3/4/5/6 Gabrb1/2/3 Gabrd/e Gabrg1/2/3 Gabrp/q        |
|---------------------|---------------------------------------------------------------|
| PKA                 | Prkaca/b/g                                                    |
| Src                 | Src                                                           |
| PKC                 | Prkca/b/g                                                     |
| HAP                 | Hap1                                                          |
| GRIF                | Trak2                                                         |
| PRIP                | Plc11                                                         |
| Gephyrin            | Gphn                                                          |
| GABARAP             | Gabarap/pl1/pl2                                               |
| NSF                 | Nsf                                                           |
| KCC2                | Slc12a5                                                       |
| GABAC               | Gabrr1/2/3                                                    |
| VGCC                | Cacna1a/b/c/d/f                                               |
| GABAB               | Gabbr1/2                                                      |
| GIRK2               | Kcnj6                                                         |
| Gi/o                | Gnai1/2/3 Gnao1 Gnb1/2/3/4 Gng2/3/4/5/7/8/10/11/12/13 Gngt1/2 |
| AC                  | Adcy1/2/3/4/5/6/7/8/9                                         |
| Cholinergic Synapse |                                                               |
| Pre-synapse         |                                                               |
| KEGG Name           | Gene Name                                                     |
| M2                  | Chrm2                                                         |
| M4                  | Chrm4                                                         |
| Gi/o                | Gnai1/2/3 Gnao1                                               |
| VGCC                | Cacna1a/b                                                     |
| vAChT               | Slc18a3                                                       |
| AChE                | Ache                                                          |
| ChAT                | Chat                                                          |
| CHT                 | Slc5a7                                                        |
| Post-synapse        |                                                               |
| KEGG Name           | Gene Name                                                     |
| M5                  | Chrm5                                                         |
| M3                  | Chrm3                                                         |
| M1                  | Chrm1                                                         |
| Gq/11               | Gnaq/Gna11                                                    |
| PLC                 | Plcb1/2/3/4                                                   |
| IP3R                | Itpr1/2/3                                                     |
| PKC                 | Prkca/b/g                                                     |
| Kv7/Kir2            | Kcnj2/4/12/14/18 Kcnq1/2/3/4/5                                |
| Kir3                | Kcnj3/6                                                       |
| PI3K(y)             | Pik3r5/6 Pi3keg                                               |
| Ras                 | H/K/N/ras                                                     |
| Mek                 | Map2k1                                                        |
| Erk                 | Mapk1/3                                                       |

| c-fos                | Fos                                                           |
|----------------------|---------------------------------------------------------------|
| Gi/o                 | Gnai1/2/3 Gnao1 Gnb1/2 3/4 Gng2/3/4/5/7/8/10/11/12/13 Gngt1/2 |
| M2                   | Chrm2                                                         |
| M4                   | Chrm4                                                         |
| AC                   | Adcy1/2/3/4/5/6/7/8/9                                         |
| PKA                  | Prkaca/b/g                                                    |
| CREB                 | Atf4/Creb1/3/5 Creb311/2/3/4                                  |
| nAChR                | Chrna3/4/6/7 Chrnb2 4                                         |
| CaMK                 | Camk2a/2b/2d/2g/4                                             |
| Fyn                  | Fyn                                                           |
| JAK2                 | Jak2                                                          |
| PI3K                 | Pi3kca/cb/r1/r2/r3                                            |
| PKB/Akt              | Akt1/2 3                                                      |
| Bcl-2                | Bcl2                                                          |
| VGCC                 | Cacna1c/d/f/s                                                 |
| Dopaminergic Synapse |                                                               |
| Pre-synapse          |                                                               |
| KEGG Name            | Gene Name                                                     |
| D2                   | Drd2                                                          |
| TH                   | Th                                                            |
| DDC                  | Ddc                                                           |
| VMAT                 | Slc18a1/2                                                     |
| VGCC                 | Cacna1a/b                                                     |
| DAT                  | Slc6a3                                                        |
| MAO                  | Maoa/b                                                        |
| COMT                 | Comtd1 Comt Lrtomt                                            |
| Post-synapse         |                                                               |
| KEGG Name            | Gene Name                                                     |
| D1                   | Drd1                                                          |
| D5                   | Drd5                                                          |
| VSCC                 | Scn1a                                                         |
| IP3R                 | Itpr1/2/3                                                     |
| Calcyon              | Caly                                                          |
| Gq                   | Gnaq                                                          |
| PLC                  | Plcb1/2/3/4                                                   |
| Gs/olf               | Gnas/l                                                        |
| AC5                  | Adcy5                                                         |
| PKA                  | Prkaca/b/g                                                    |
| CaM                  | Calm2/3                                                       |
| PKC                  | Prkca/b/g                                                     |
| CaMKII               | Camk2a/2b/2d/2g                                               |
| PP2B                 | Ppp3ca/cb                                                     |
| CREB                 | Creb1/3/5 Atf2/4/6b Creb311/2/3/4                             |



|            |                                                               |
|------------|---------------------------------------------------------------|
| c-fos      | Fos                                                           |
| MAPK       | Mapk8/9/10 11/12/13/14                                        |
| DARPP32    | Ppp1r1b                                                       |
| PP-1       | Ppp1ca/cb/cc                                                  |
| NMDAr      | Grin1/2a/2b                                                   |
| AMPAr      | Gria1/2/3/4                                                   |
| Kinesin    | Kif5a/b/c                                                     |
| Clock      | Clock                                                         |
| BMAL1      | Arntl                                                         |
| D2         | Drd2                                                          |
| PP2A       | Ppp2ca/b Ppp2r1a/c Ppp2r2a/b/c/d Ppp2r3a/b/c Ppp2r5a/b/c/d/e  |
| Gi/o       | Gnai1/2/3 Gnao1 Gnb1/2/3/4 Gng2/3/4/5/7/8/10/11/12/13 Gngt1/2 |
| Akt        | Akt1/2/3                                                      |
| GSK-3      | Gsk3a/3b                                                      |
| bArrII     | Arrb2                                                         |
| Cav1.2/1.3 | Cacna1c/d                                                     |
| GIRK       | Kcnj3/5/6/9                                                   |
| Cav2.1/2.2 | Cacna1a/b                                                     |

### Supplementary Data: Uncropped images from capillary immunoblot experiments

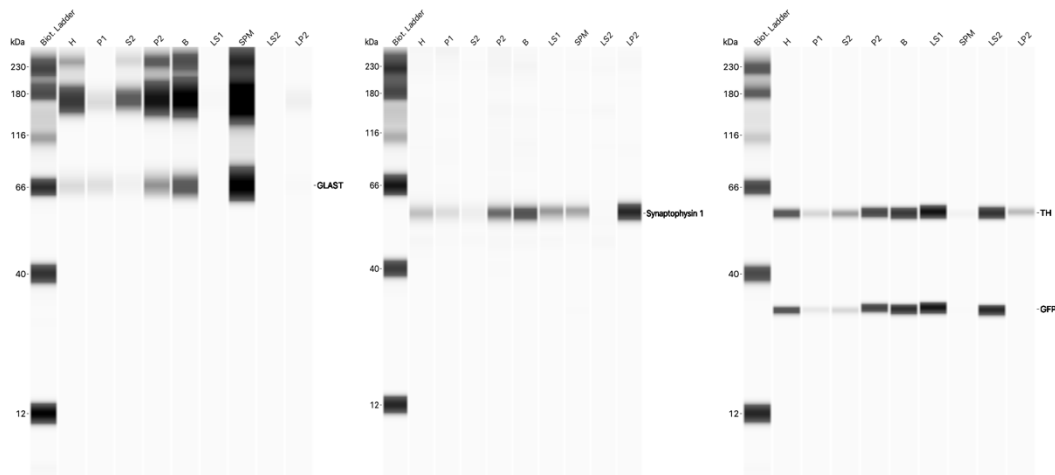

Pictures from Figure 1c

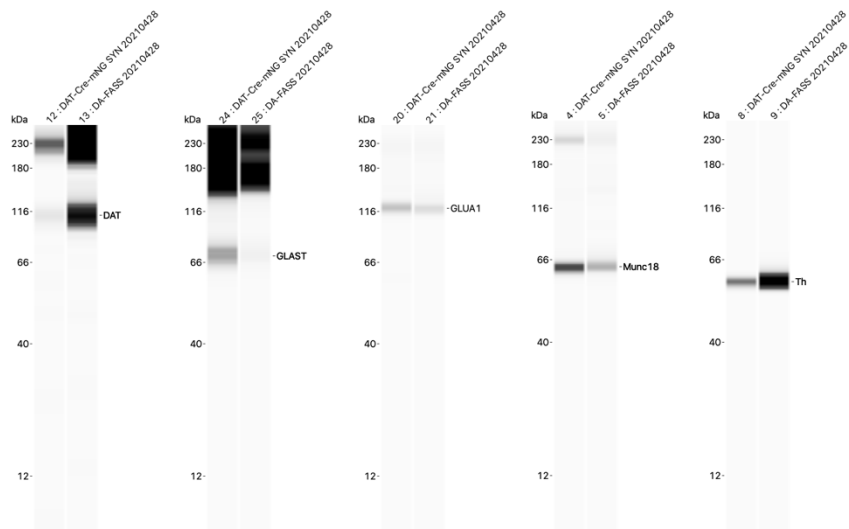

Pictures from Figure 1g

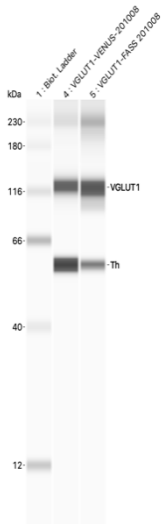

Picture from Figure 7c
